# Supplementary material for: Oxidative cross coupling reaction mediated by I2/H2O2: a novel approach for the construction of fused thiazole containing coumarin derivatives
Source: Royal Society of Chemistry journal article supplement (doi:10.1039/c5ra20405d), 2015-01-01

## Supporting Information

Oxidative cross coupling reaction mediated by  $I_2/H_2O_2$ : A novel approach for construction of fused thiazole containing coumarin derivatives.

Md. Belal and Abu T. Khan\*

*Department of Chemistry, Indian Institute of Technology Guwahati, Guwahati 781 039, India*

Tel.: +91 361 2582305; fax: +91 361 2582349.

E-mail address: atk@iitg.ernet.in (A.T. Khan).

|                                                                             |          |
|-----------------------------------------------------------------------------|----------|
| Title page                                                                  | S1       |
| Experimental General and Crystallographic description of compound <b>2a</b> | S2       |
| Copy of $^1H$ NMR, $^{13}C$ NMR and HRMS spectra of compounds <b>1a-v</b>   | S3-S68   |
| Copy of $^1H$ NMR, $^{13}C$ NMR and HRMS spectra of compounds <b>2a-v</b>   | S69-S134 |

## Experimental General

Melting points were determined on a Büchi melting point apparatus. IR spectra were recorded on Perkin-Elmer 281 IR spectrophotometer.  $^1\text{H}$  NMR spectra were recorded on Bruker 600 MHz and Varian 400 MHz spectrometer with TMS as internal reference; chemical shifts ( $\delta$  scale) are reported in parts per million (ppm).  $^1\text{H}$  NMR Spectra are reported in the order: multiplicity, coupling constant (J value) in hertz (Hz) and no. of protons, signals were characterized as s (singlet), d (doublet), t (triplet), m (multiplet), and dd (doublet of double). HRMS spectra were recorded using WATERS MS system, Q-TOF premier and data analyzed using Mass Lynx 4.1. The X-ray crystal structures were determined with a Siemen P-4 diffractometer. Complete crystallographic data of **2a** (CCDC 1013314) for the structural analysis have been deposited with the Cambridge Crystallographic Data Centre, Copies of this information may be obtained free of charge from the Director, Cambridge Crystallographic Data Centre, 12 Union Road, Cambridge CB2 1EZ, UK, (fax: +44-1223-336033, e-mail: deposit@ccdc.cam.ac.uk or via: [www.ccdc.cam.ac.uk](http://www.ccdc.cam.ac.uk)).

**Crystallographic Description:** Crystal data were collected with Bruker Smart Apex-II CCD diffractometer using graphite monochromated  $\text{MoK}\alpha$  radiation ( $\lambda = 0.71073 \text{ \AA}$ ) at 298 K. Cell parameters were retrieved using SMART software and refined with SAINT on all observed reflections. Data reduction was performed with the SAINT software and corrected for Lorentz and polarization effects. Absorption corrections were applied with the program SADABS. The structure was solved by direct methods implemented in SHELX-97 program and refined by full-matrix least-squares methods on  $F^2$ . All non-hydrogen atomic positions were located in difference Fourier maps and refined anisotropically. The hydrogen atoms were placed in their geometrically generated positions. Compound **2a** empirical formula  $\text{C}_{16}\text{H}_9\text{NO}_2\text{S}$ , pale yellow crystal, formula wt 301.29, Monoclinic,  $P -1$ ,  $a = 8.2110(2) \text{ \AA}$ ,  $b = 8.9277(2) \text{ \AA}$ ,  $c = 9.0926(2) \text{ \AA}$ ,  $V = 652.53(3) \text{ \AA}^3$ ,  $Z = 2$ ,  $F(000) = 288.0$ ,  $\text{GOF}(S) = 1.049$ . Final indices  $R_{\text{obs}} = 0.0330$ ,  $wR_{\text{obs}} = 0.0887$  with  $I > 2\sigma(I)$ ;  $R_{\text{all}} = 0.0361$ ,  $wR_{\text{all}} = 0.0913$  for all data.

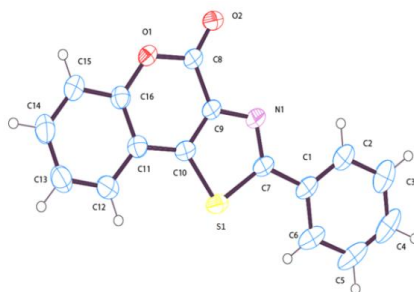

**Figure 1.** Single crystal structure of **2a** (CCDC: 1013314)

# <sup>1</sup>H NMR spectra of **1a**

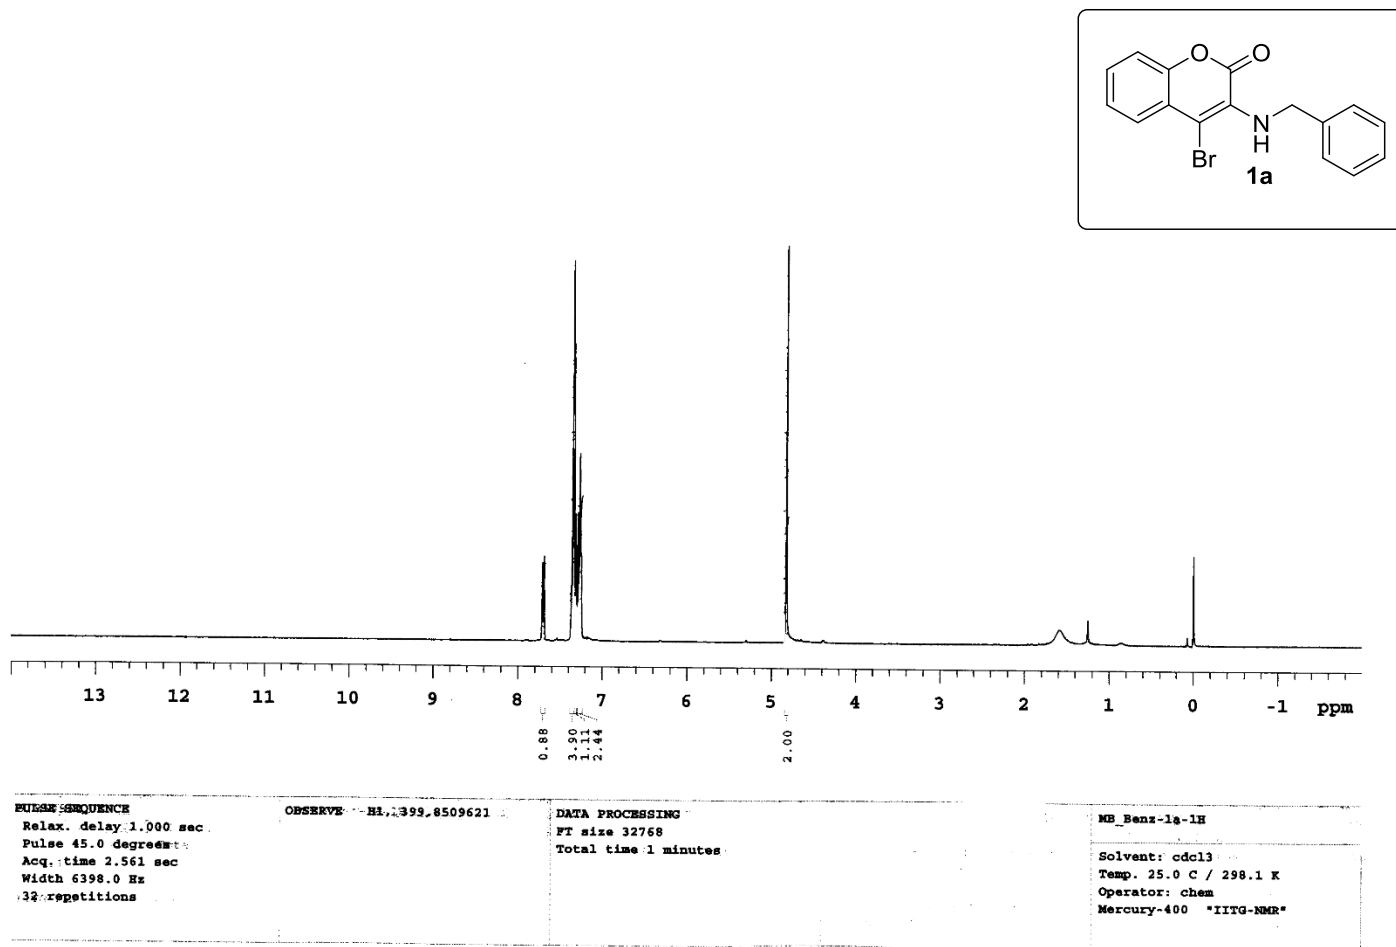

<sup>13</sup>C NMR spectra of **1a**

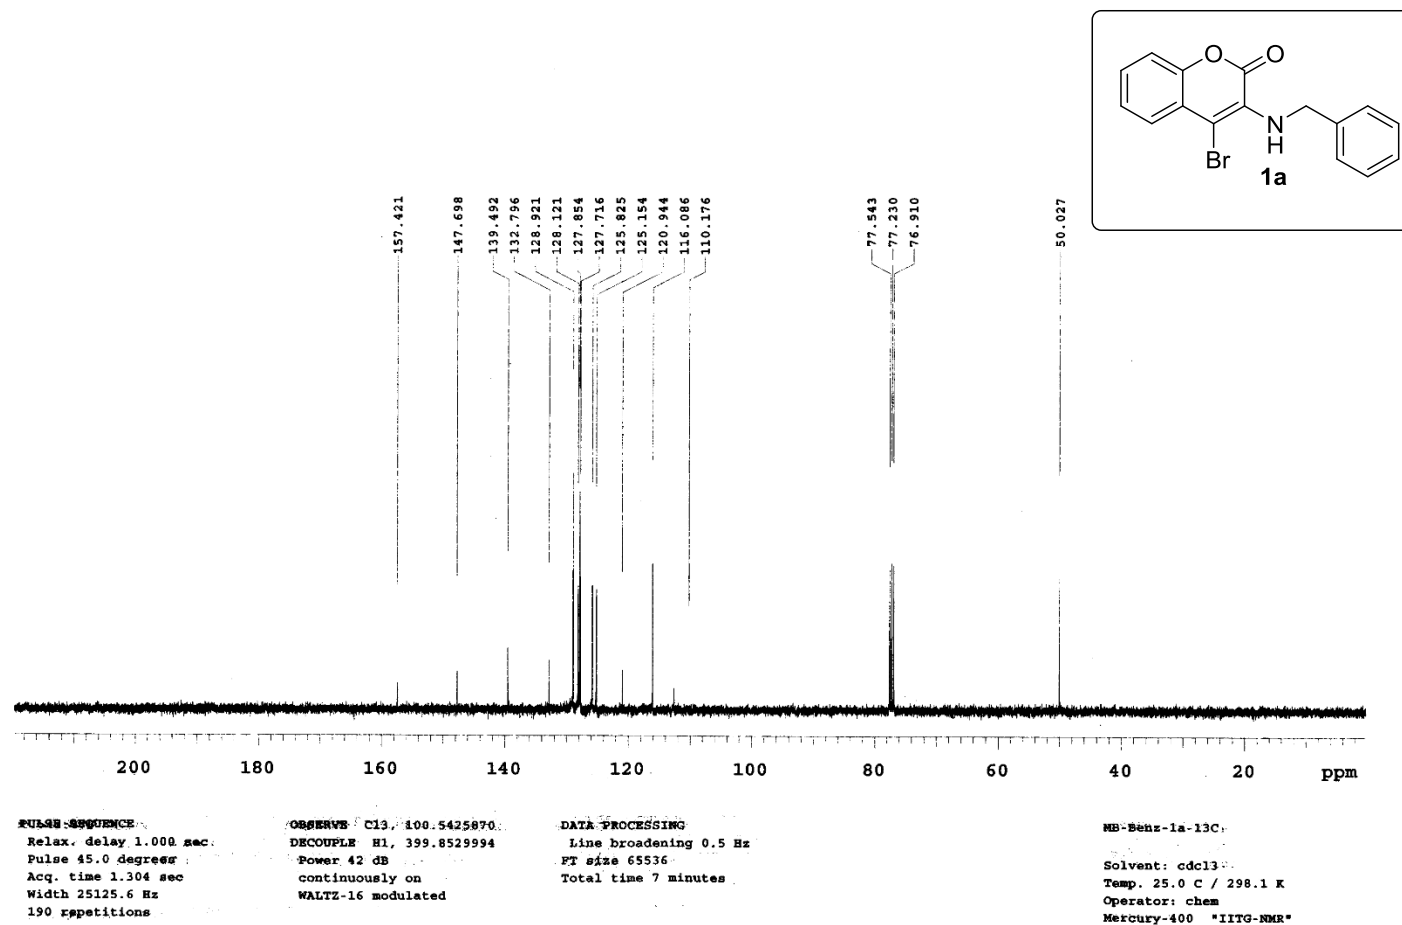



# HRMS Spectra of **1a**

Sample Name  
Inj Vol  
Data Filename

Position  
InjPosition  
ACQ Method

Instrument Name  
SampleType  
Comment

User Name  
IRM Calibration Status  
Acquired Time

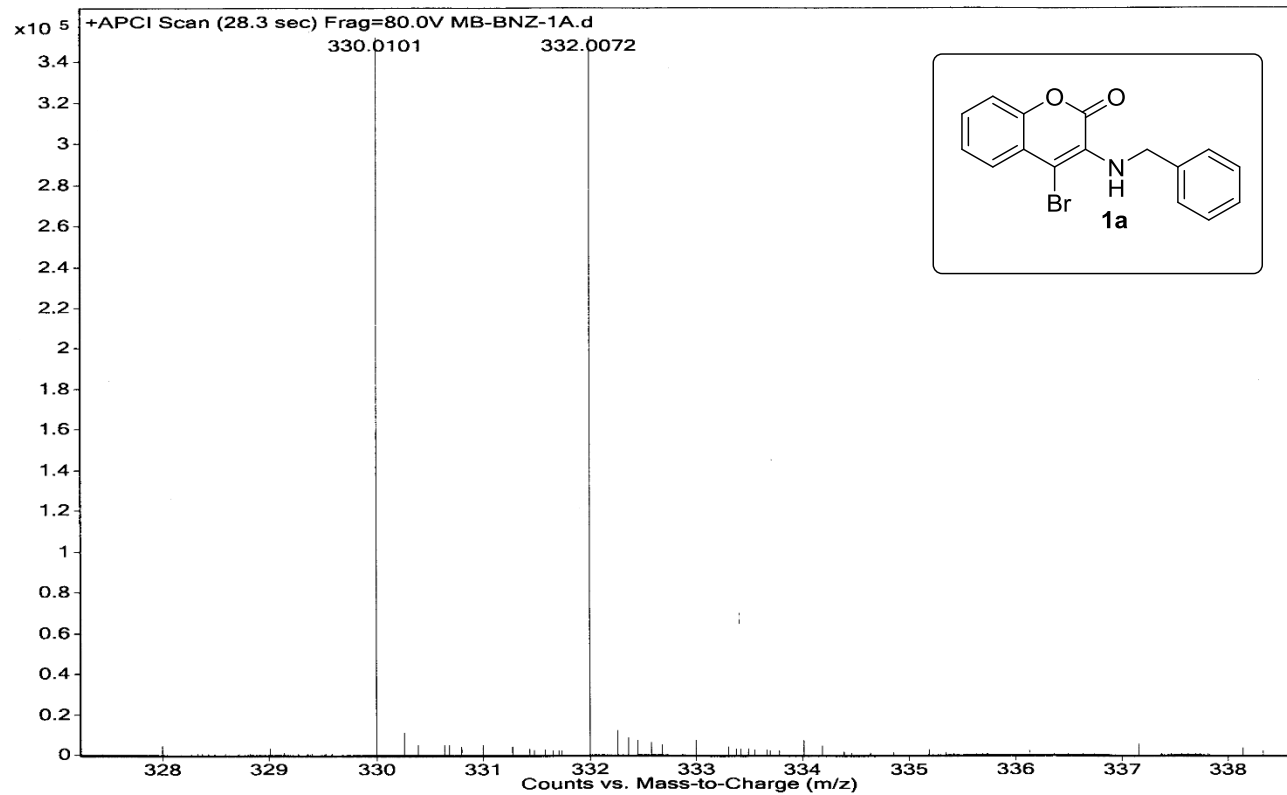

# <sup>1</sup>H NMR spectra of **1b**

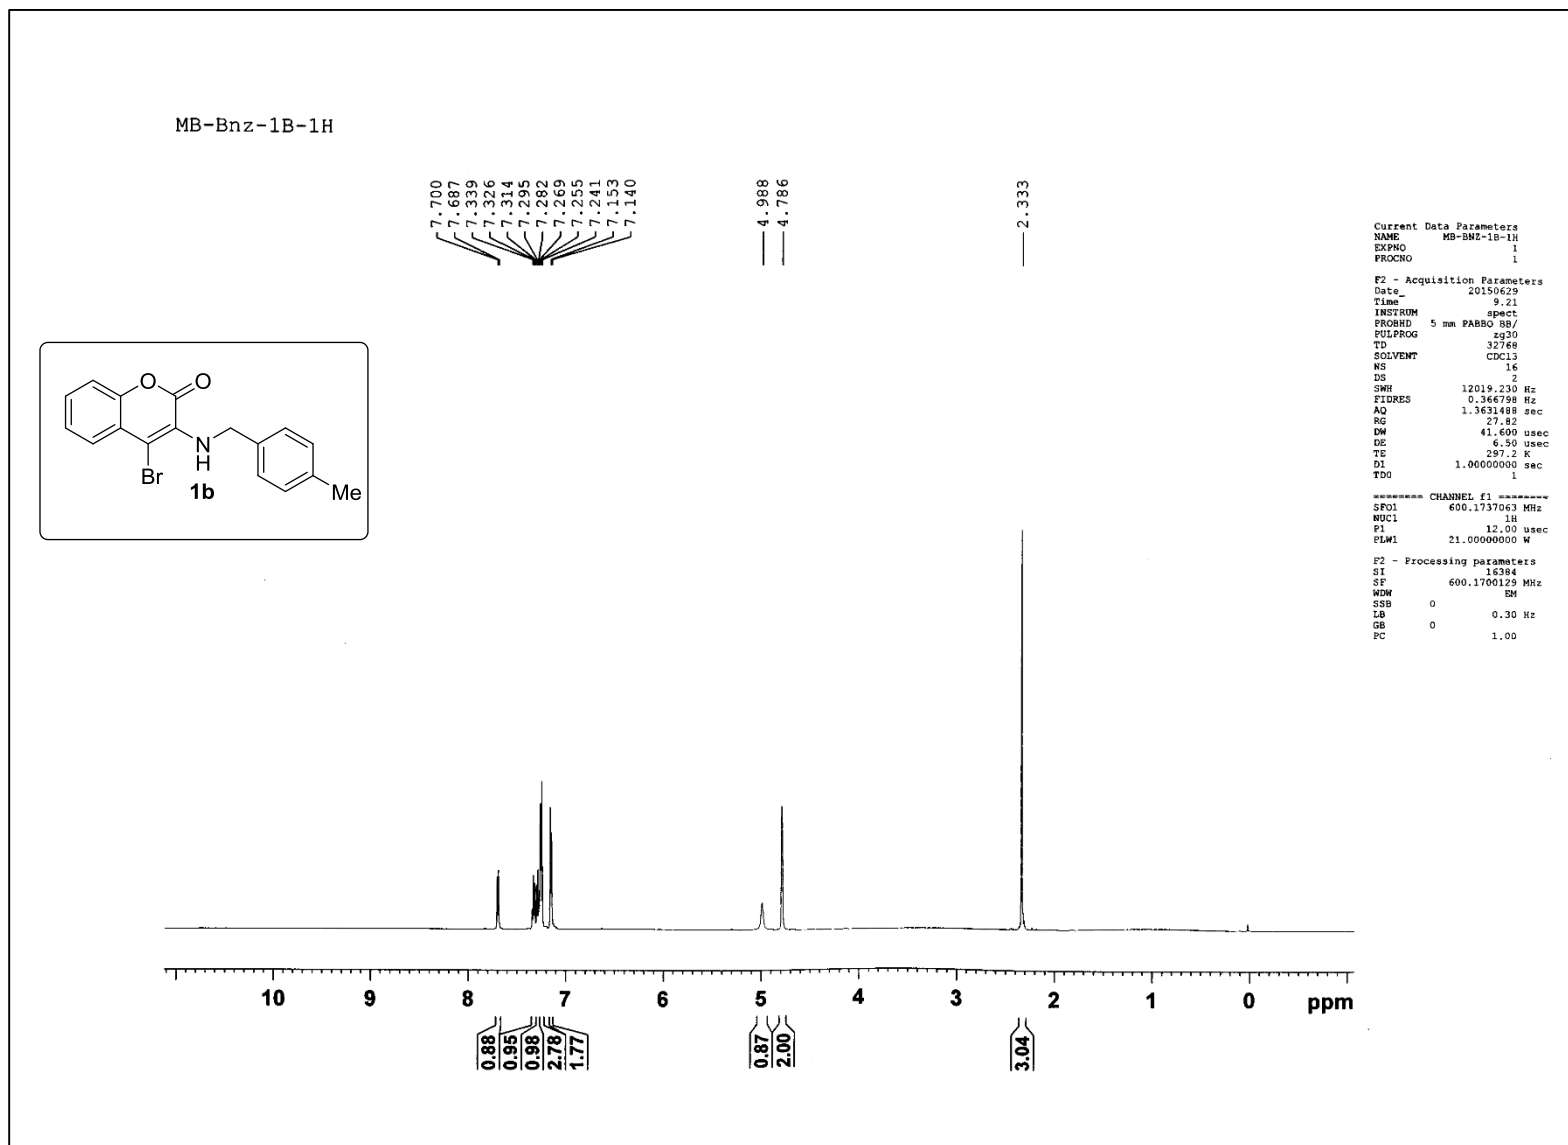

<sup>13</sup>C NMR spectra of **1b**

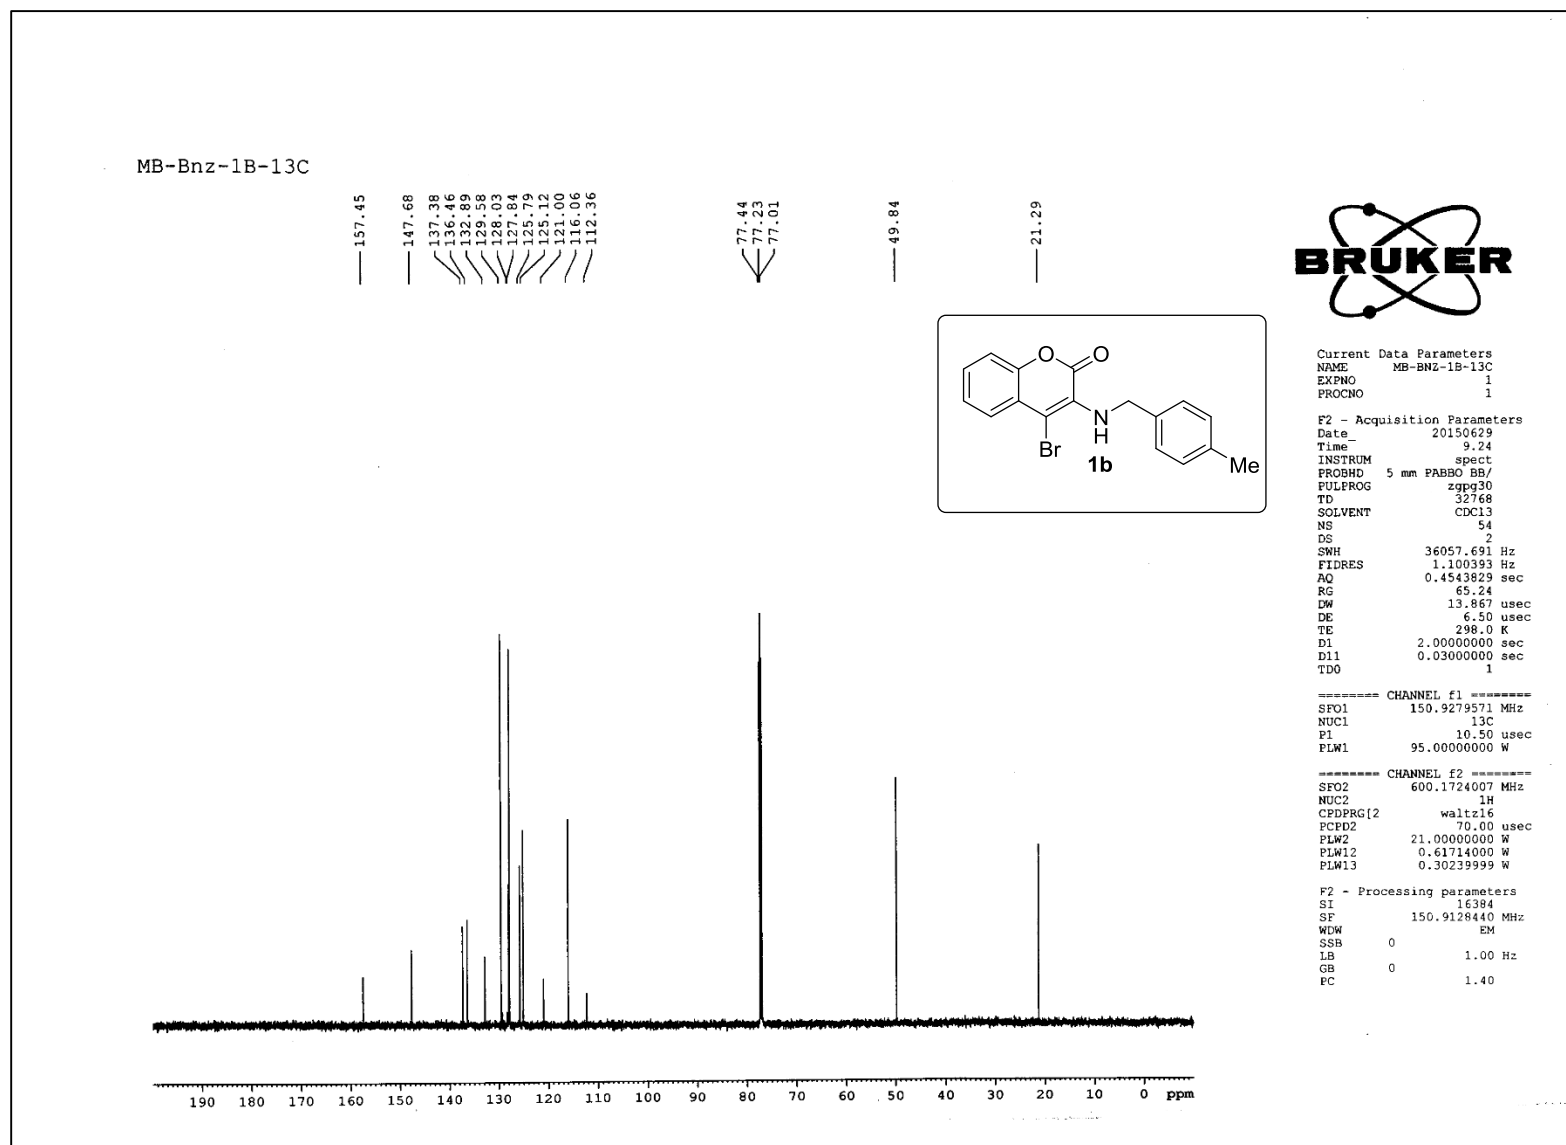

# HRMS Spectra of **1b**

Sample Name  
Inj Vol  
Data Filename

Position  
InjPosition  
ACQ Method

Instrument Name  
SampleType  
Comment

User Name  
IRM Calibration Status  
Acquired Time

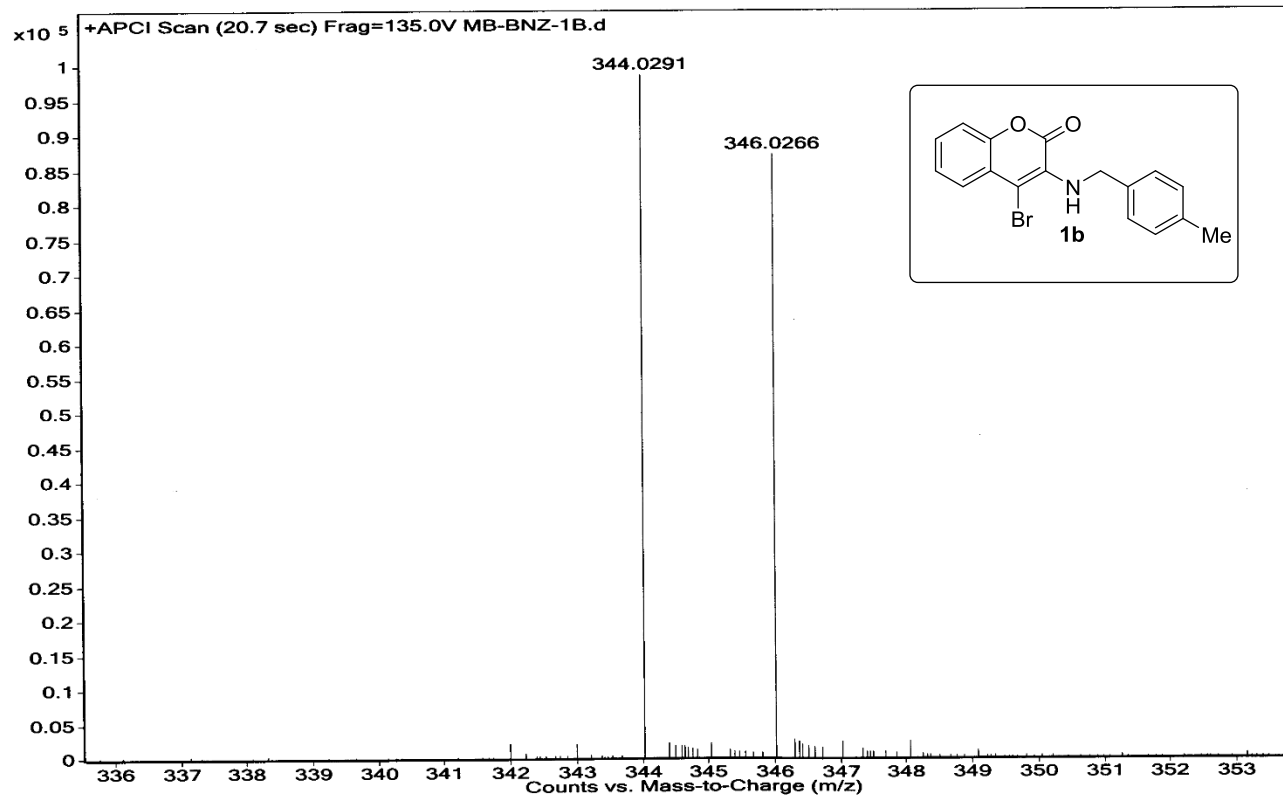

# <sup>1</sup>H NMR spectra of **1c**

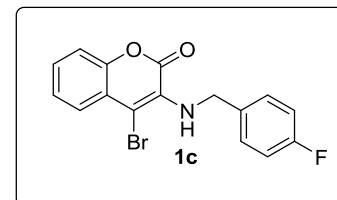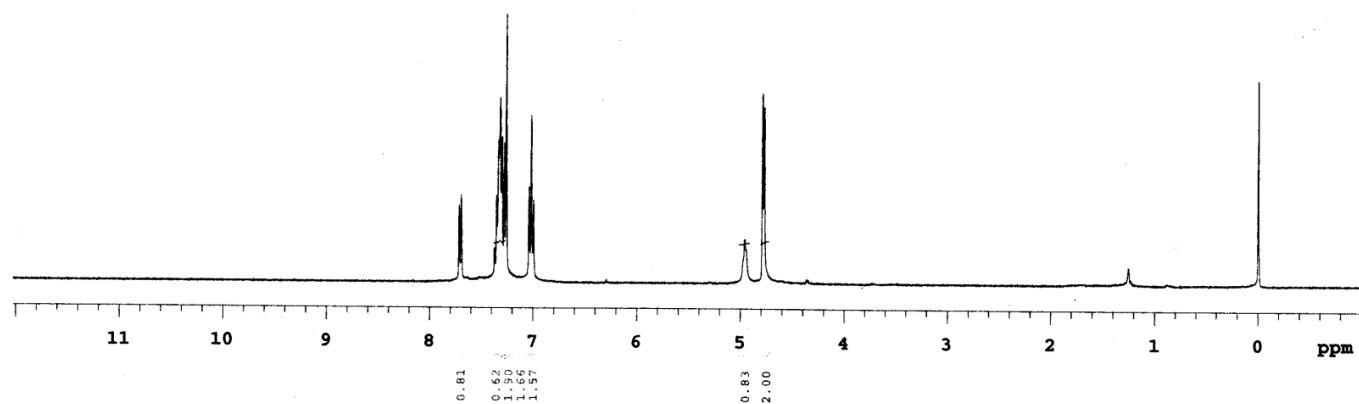

PULSE SEQUENCE  
Relax. delay 1.000 sec  
Pulse 45.0 degrees  
Acq. time 2.561 sec  
Width 6398.0 Hz  
64 repetitions

NAME: 1c  
EXPNO: 1  
PROCNO: 1  
F2: 399.8509634

DATA PROCESSING  
FT size 32768  
Total time 3 minutes

NAME: 1c  
Solvent: DMSO-d6  
Temp. 25.0°C / 298.1 K  
Operator: chem  
File: MS-Benz-1E-1H  
Mercury-400 "IITG-NMR"

<sup>13</sup>C NMR spectra of **1c**

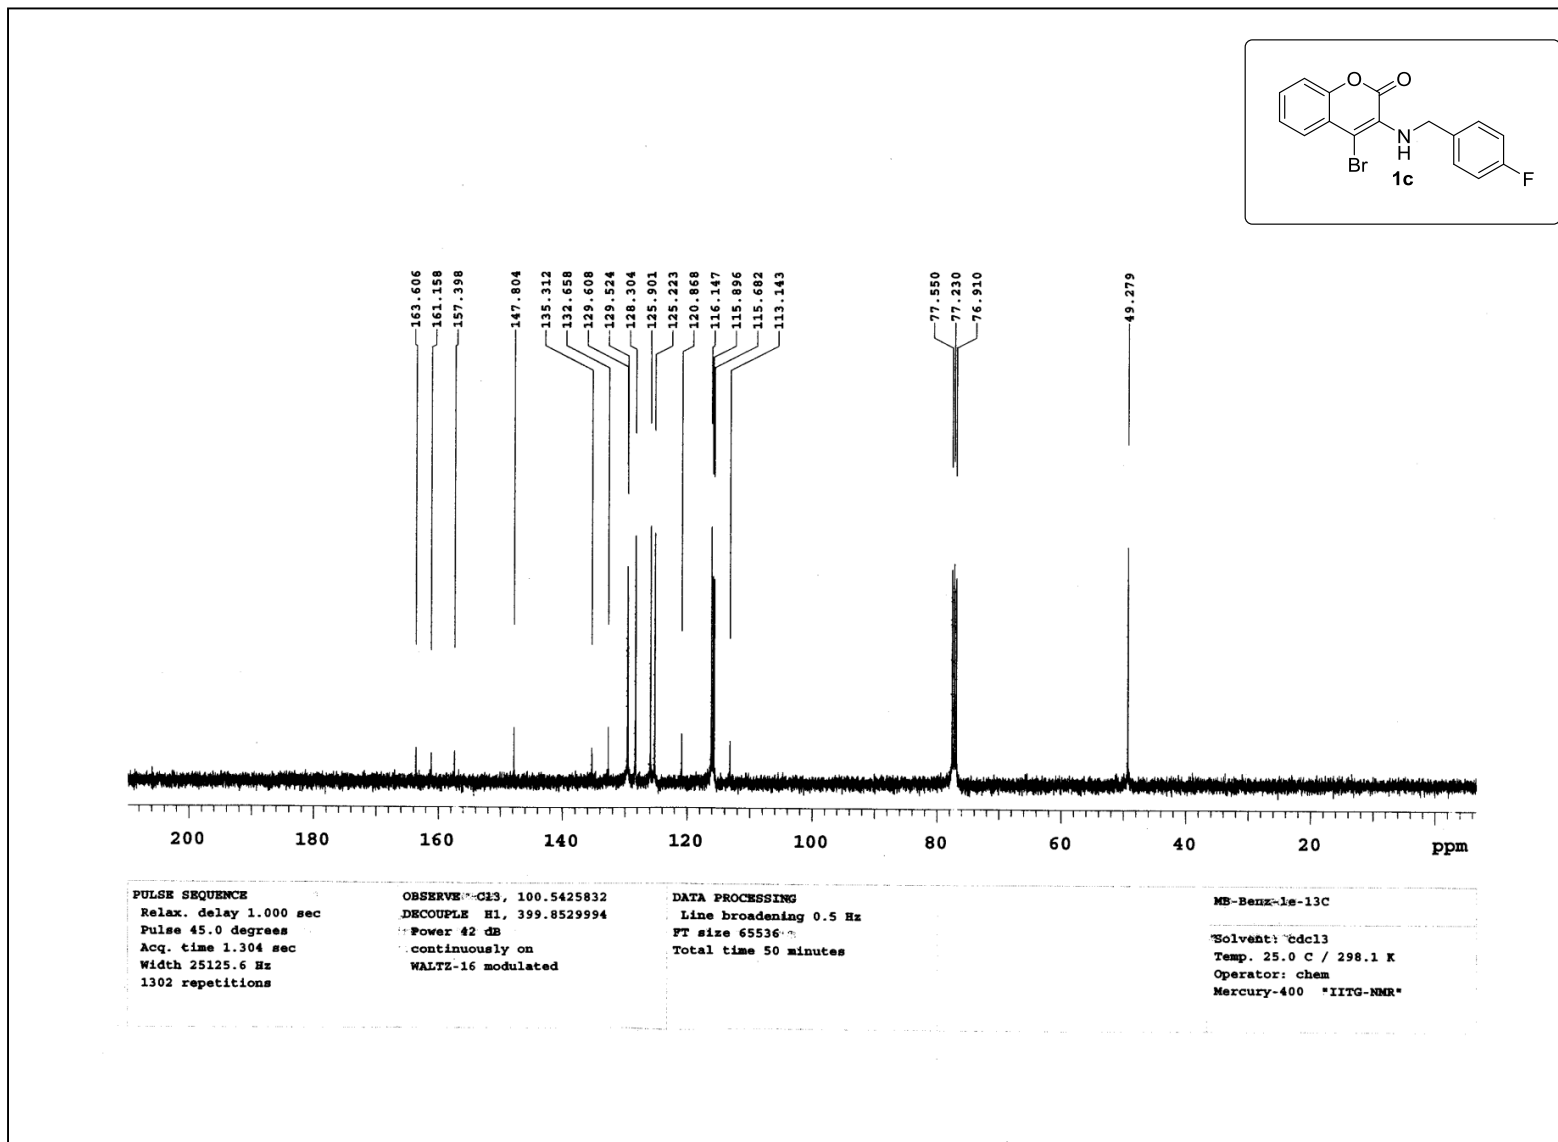

# HRMS spectra of 1c

|                      |             |                    |        |                        |              |                               |                       |
|----------------------|-------------|--------------------|--------|------------------------|--------------|-------------------------------|-----------------------|
| <b>Sample Name</b>   | MB-BNZ-1E   | <b>Position</b>    | Vial 1 | <b>Instrument Name</b> | Instrument 1 | <b>User Name</b>              |                       |
| <b>Inj Vol</b>       | -10         | <b>InjPosition</b> |        | <b>SampleType</b>      | Sample       | <b>IRM Calibration Status</b> | Success               |
| <b>Data Filename</b> | MB-BNZ-1E.d | <b>ACQ Method</b>  |        | <b>Comment</b>         |              | <b>Acquired Time</b>          | 8/18/2015 10:53:52 AM |

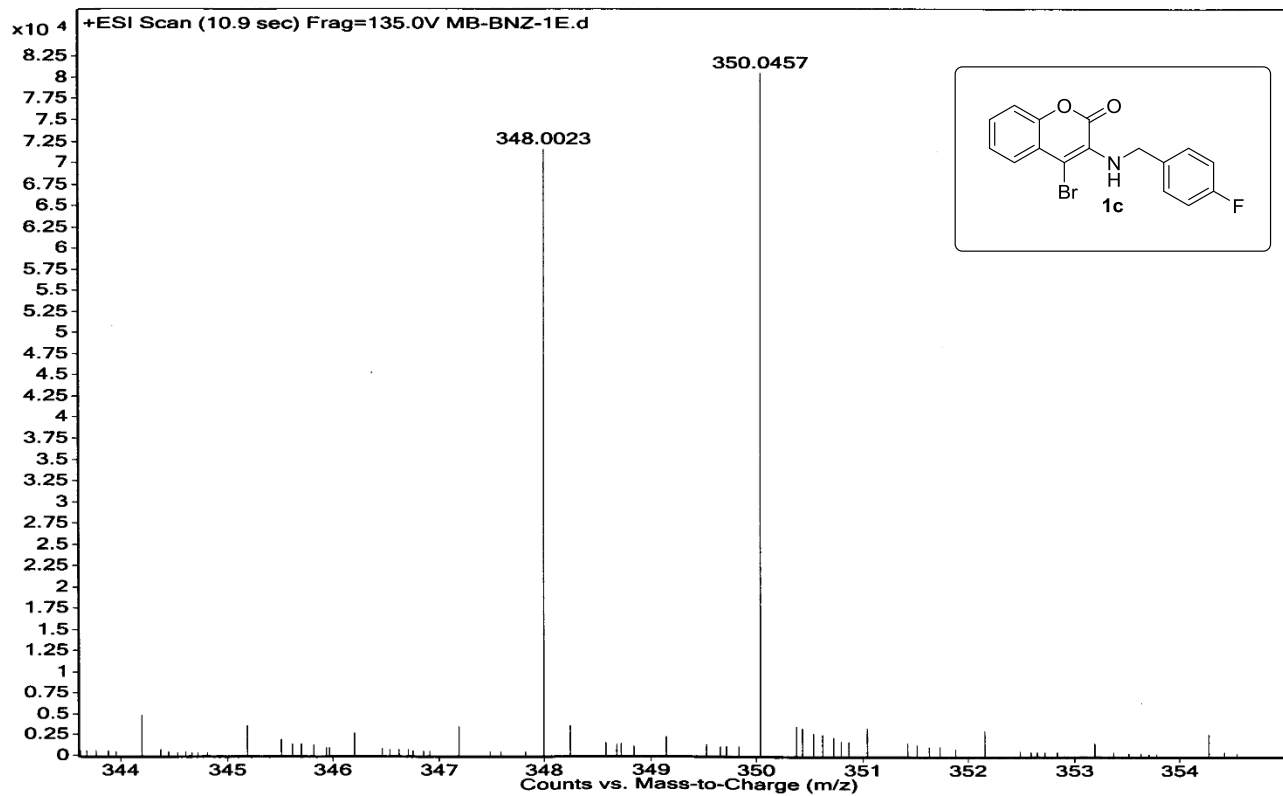

<sup>1</sup>H NMR spectra of **1d**

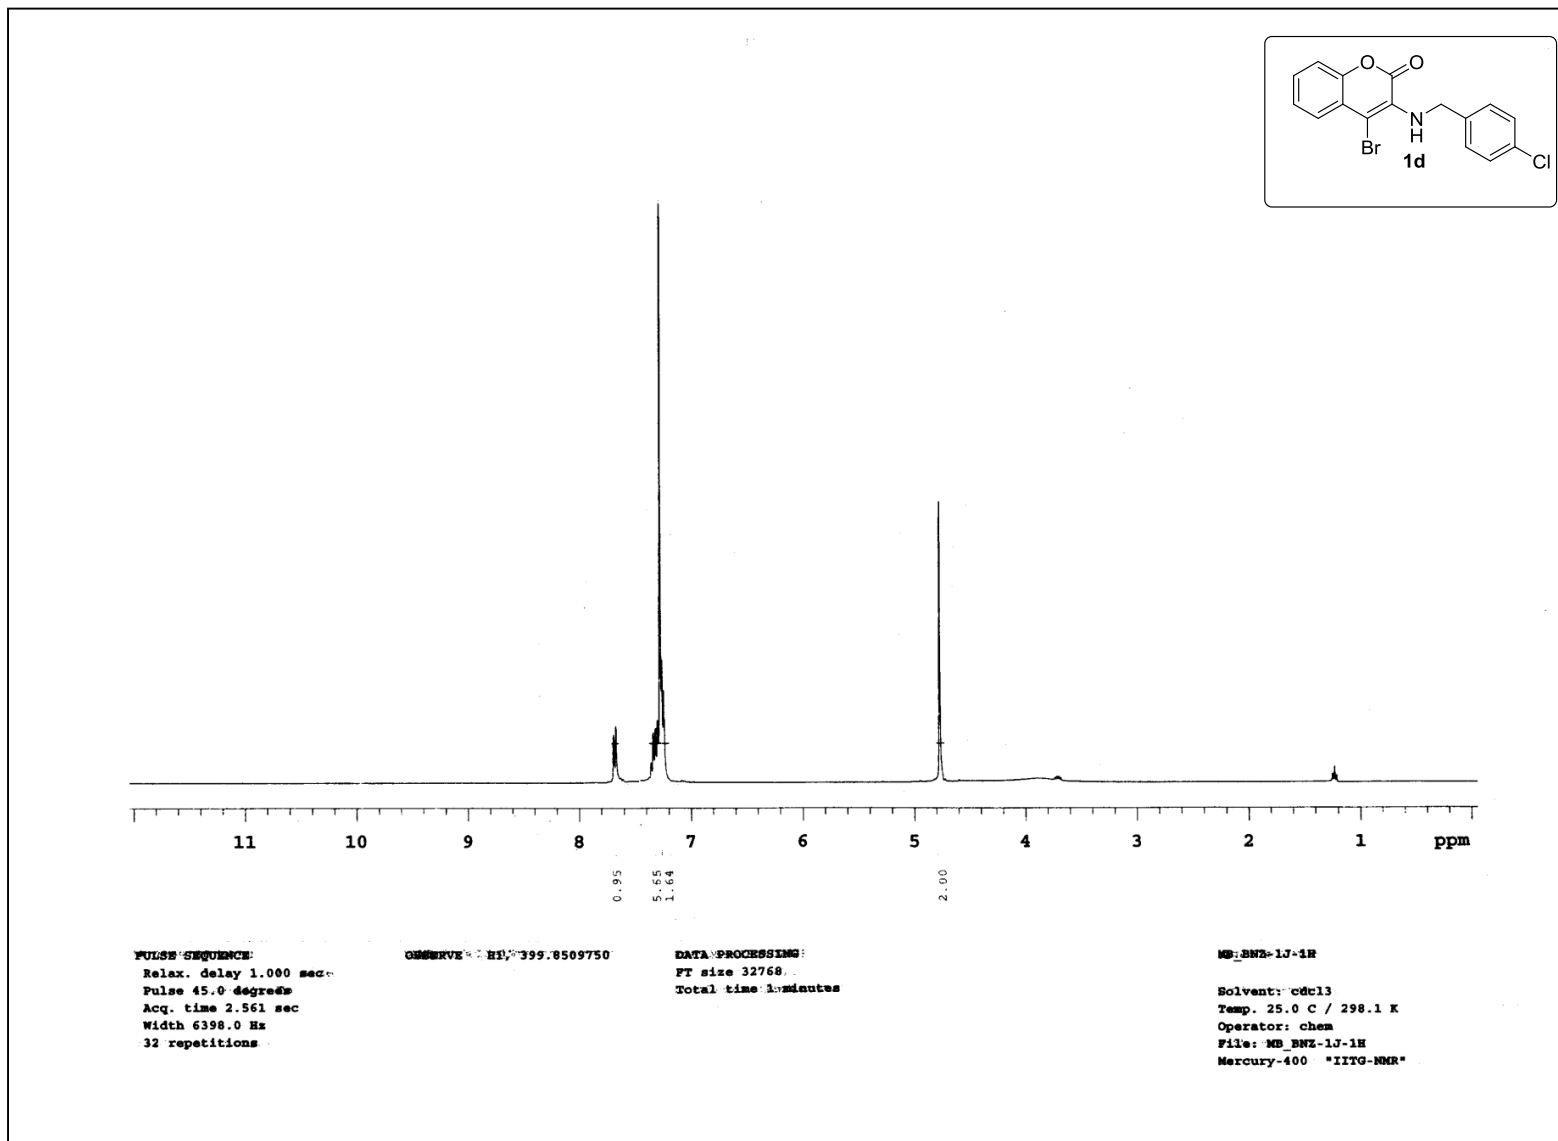



<sup>13</sup>C NMR spectra of **1d**

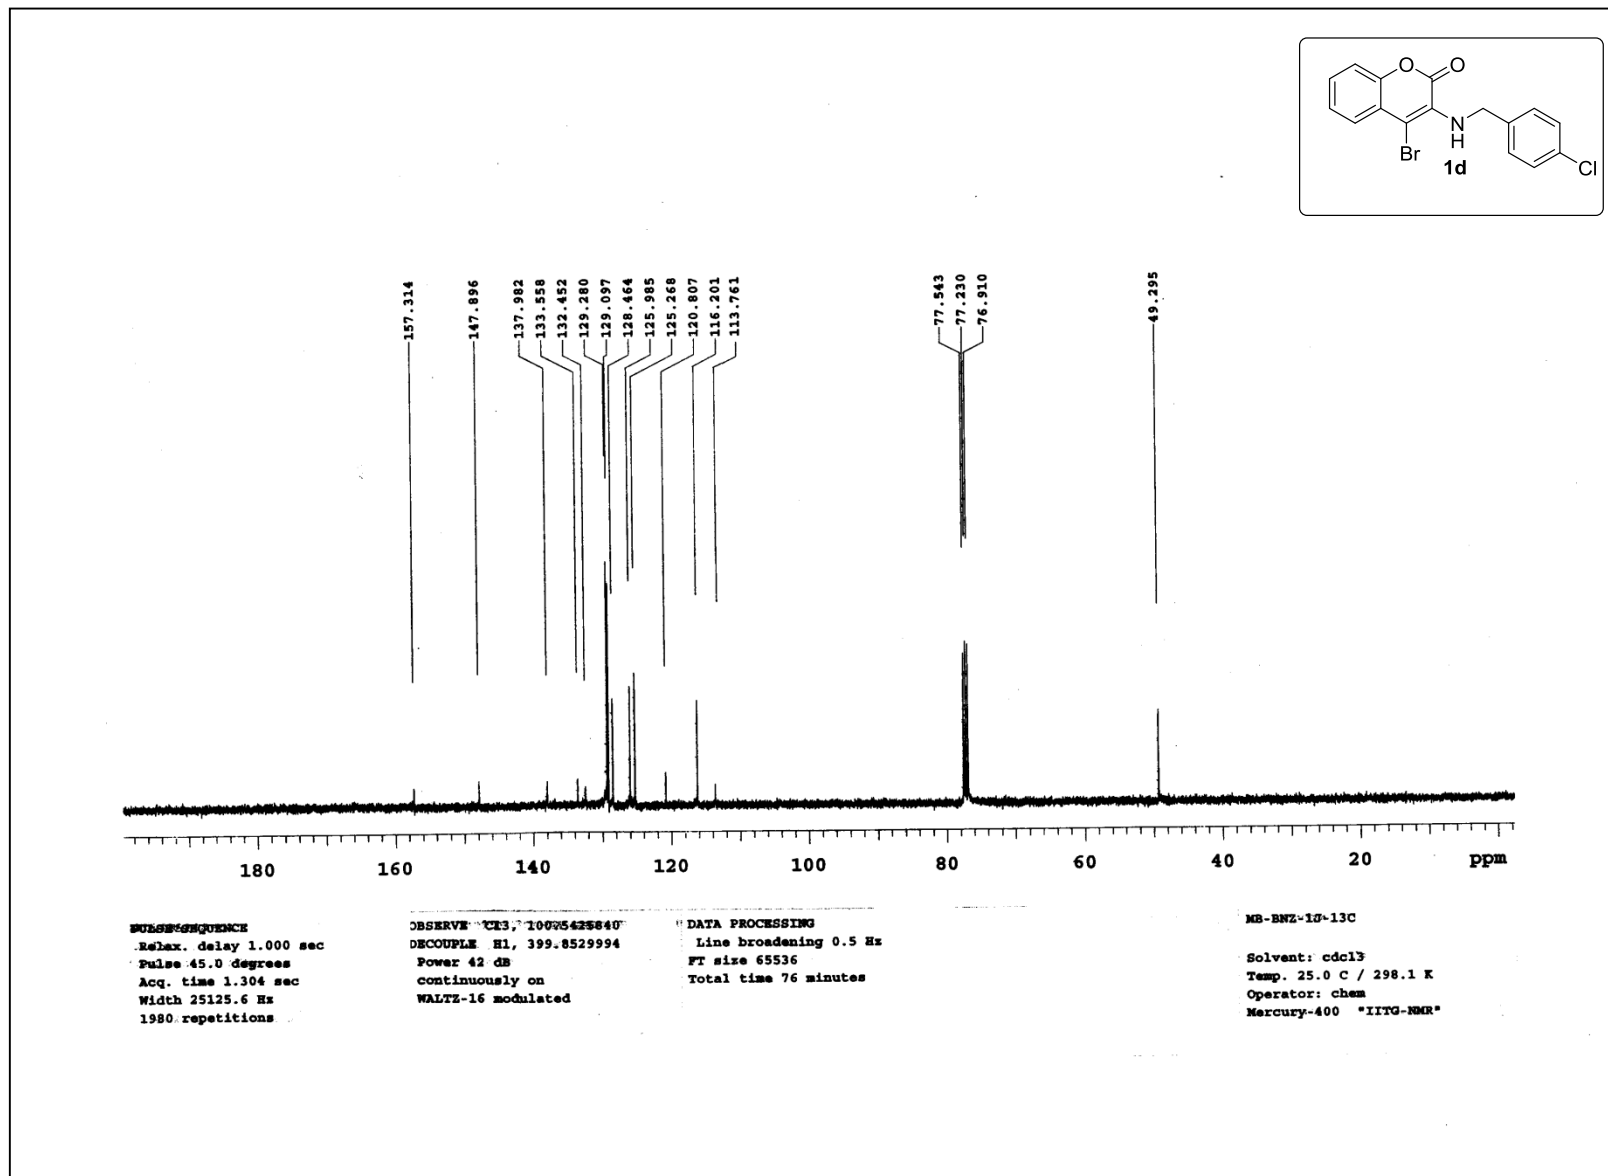

# HRMS Spectra of **1d**

| Sample Name   | Position    | Instrument Name | User Name              |
|---------------|-------------|-----------------|------------------------|
| Inj Vol       | InjPosition | SampleType      | IRM Calibration Status |
| Data Filename | ACQ Method  | Comment         | Acquired Time          |

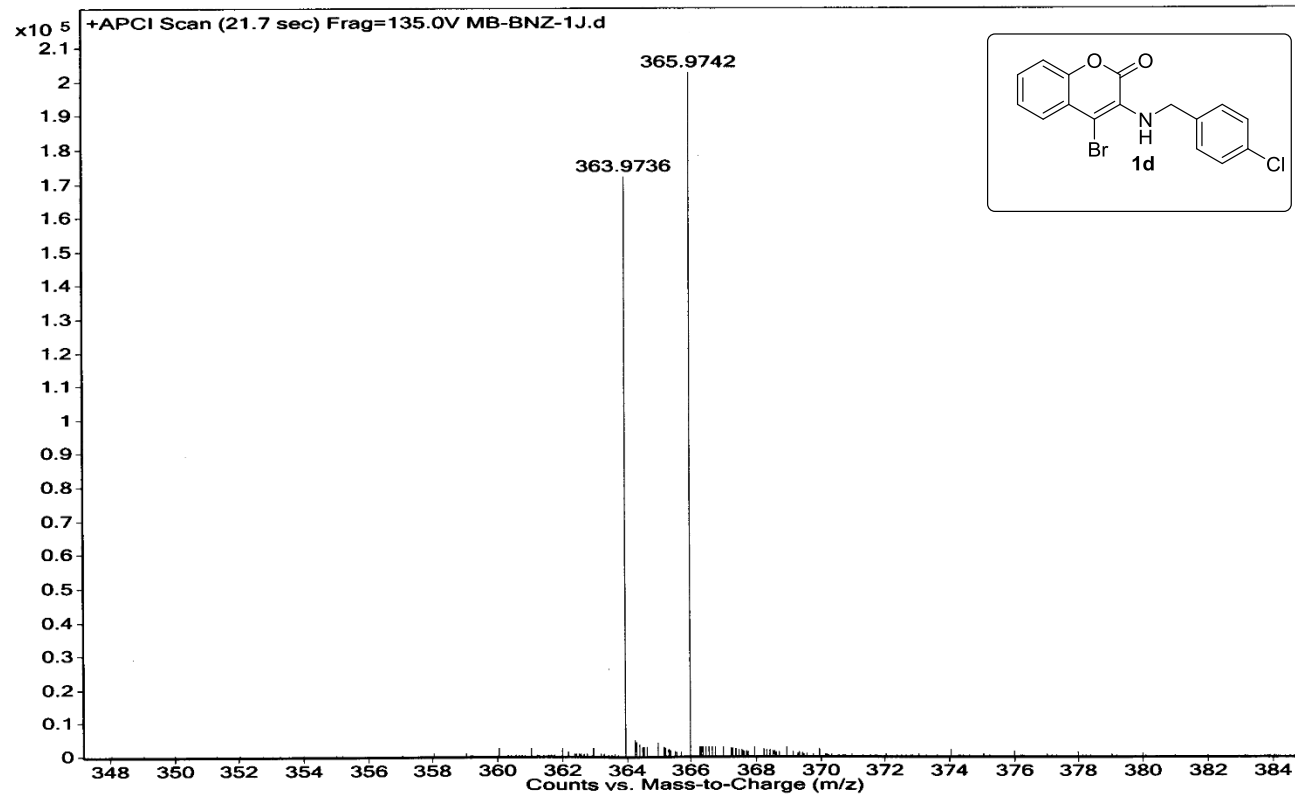

<sup>1</sup>H NMR spectra of **1e**

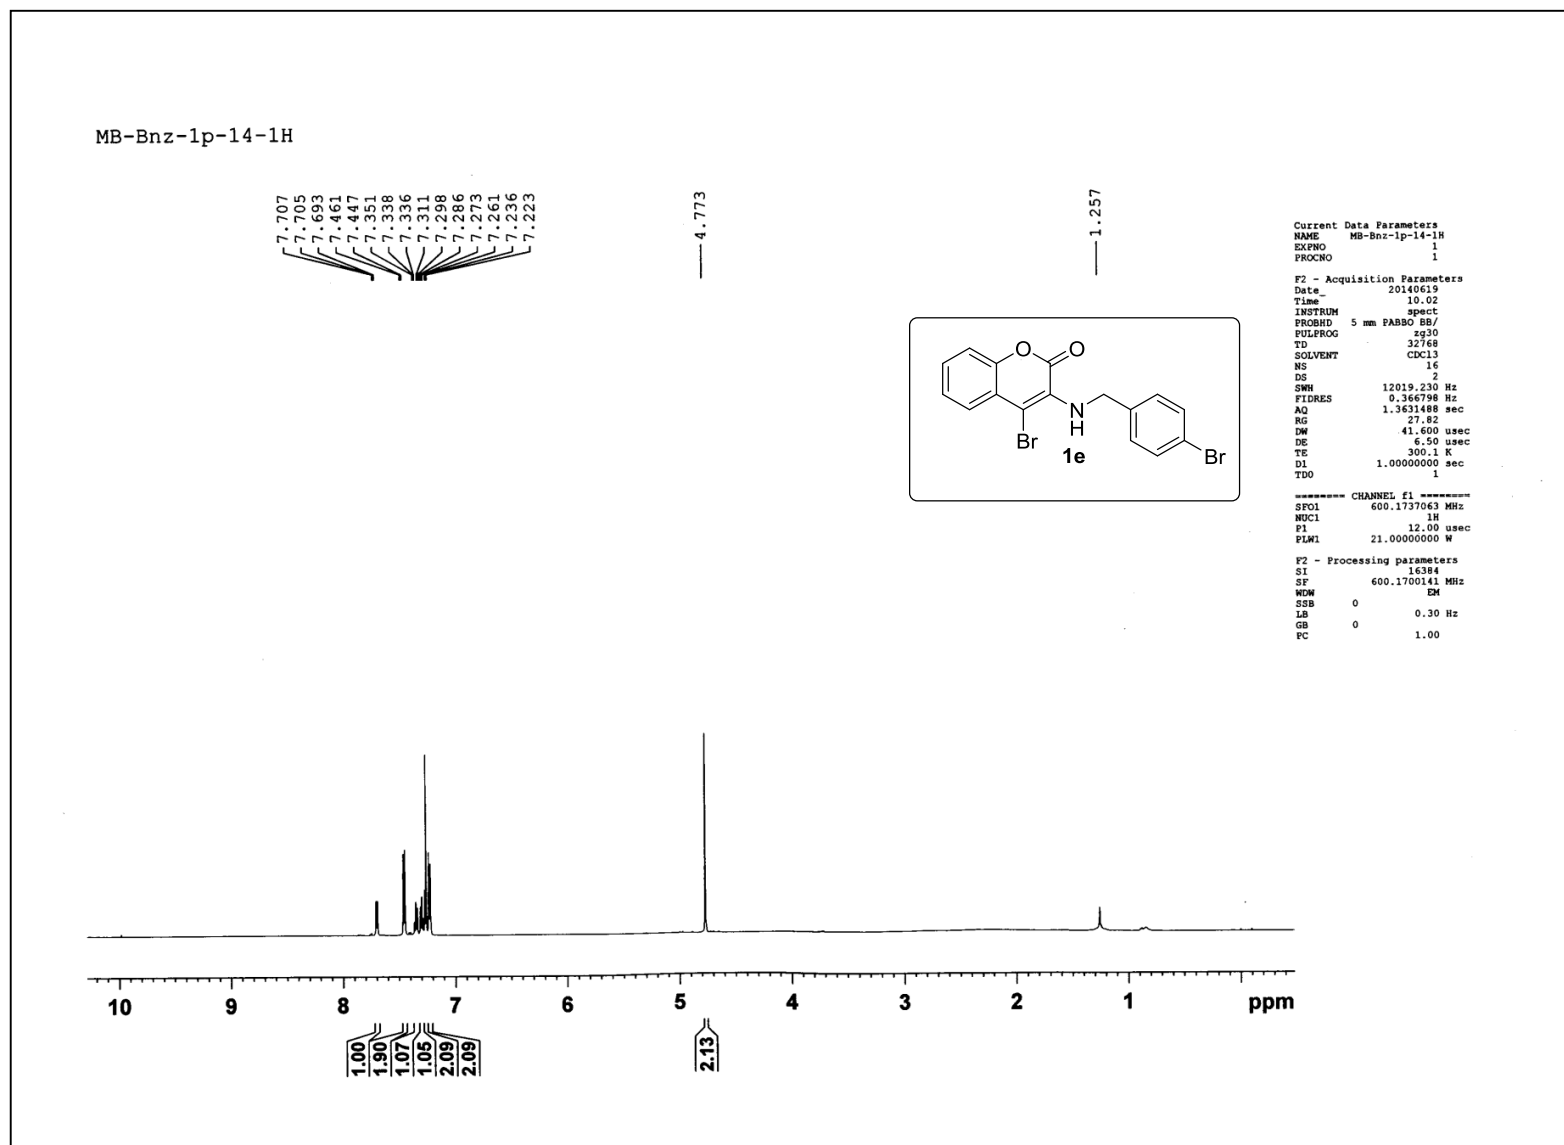

<sup>13</sup>C NMR spectra of **1e**

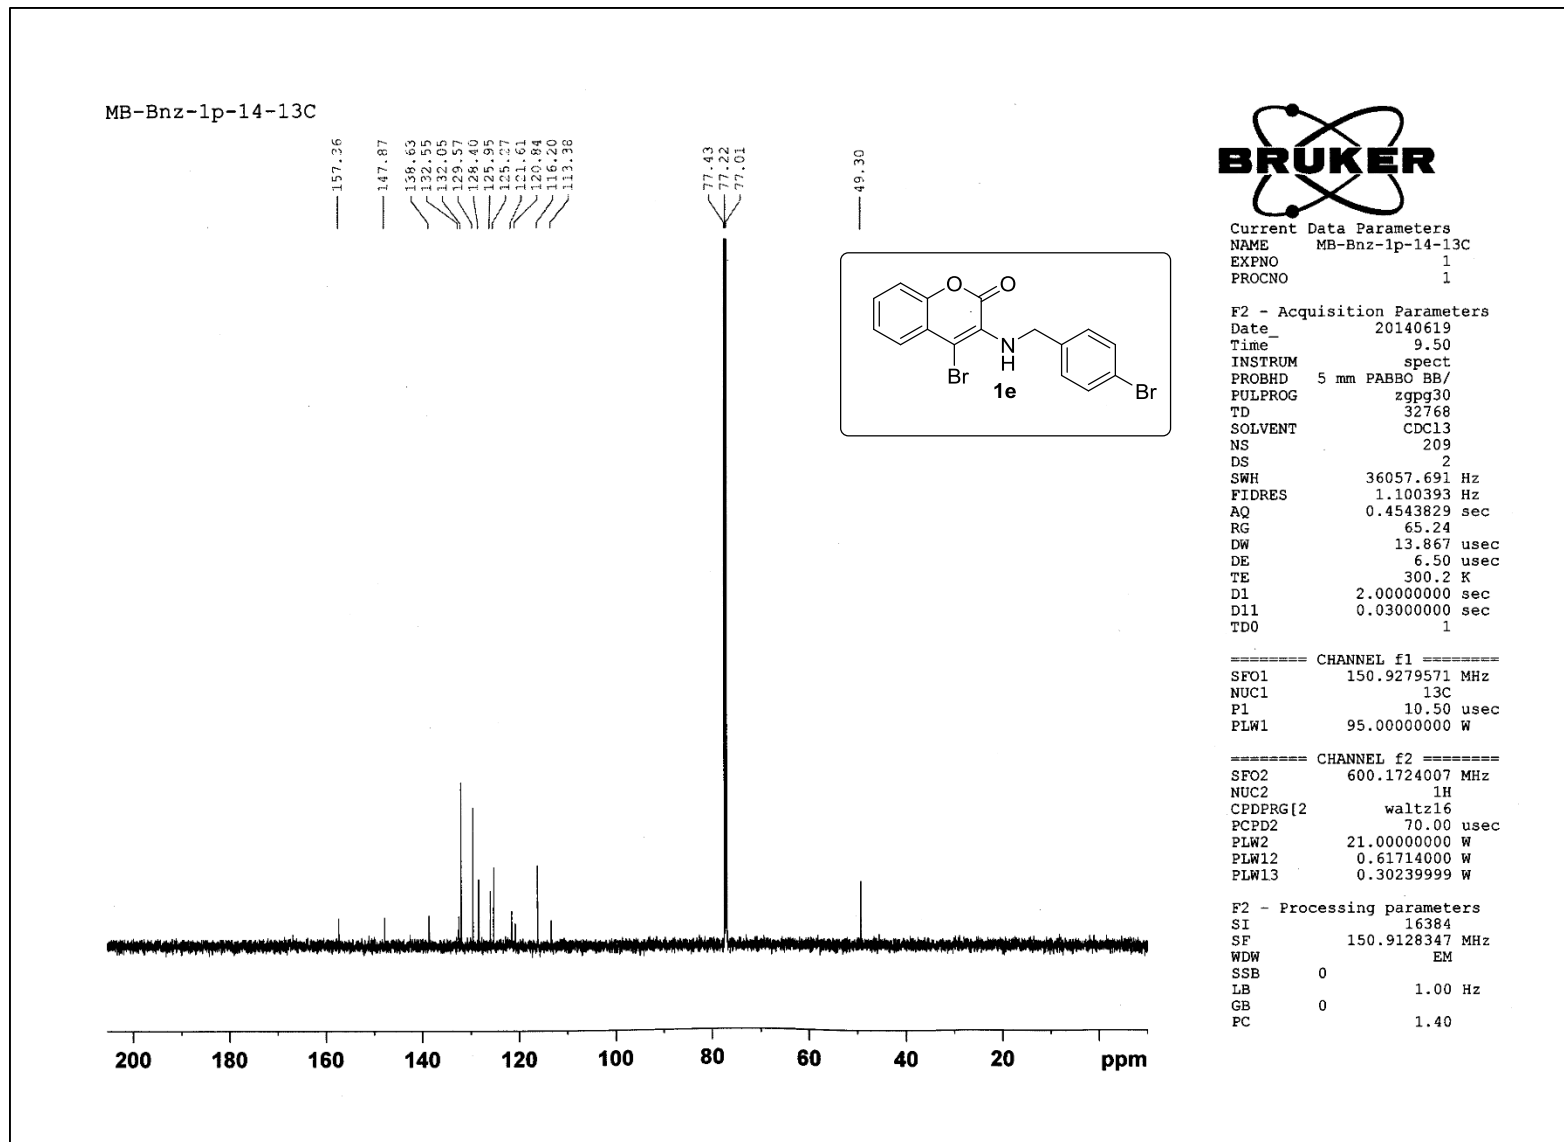

# HRMS Spectra of 1e

| Sample Name   | Position    | Instrument Name | User Name              |
|---------------|-------------|-----------------|------------------------|
| Inj Vol       | InjPosition | SampleType      | IRM Calibration Status |
| Data Filename | ACQ Method  | Comment         | Acquired Time          |

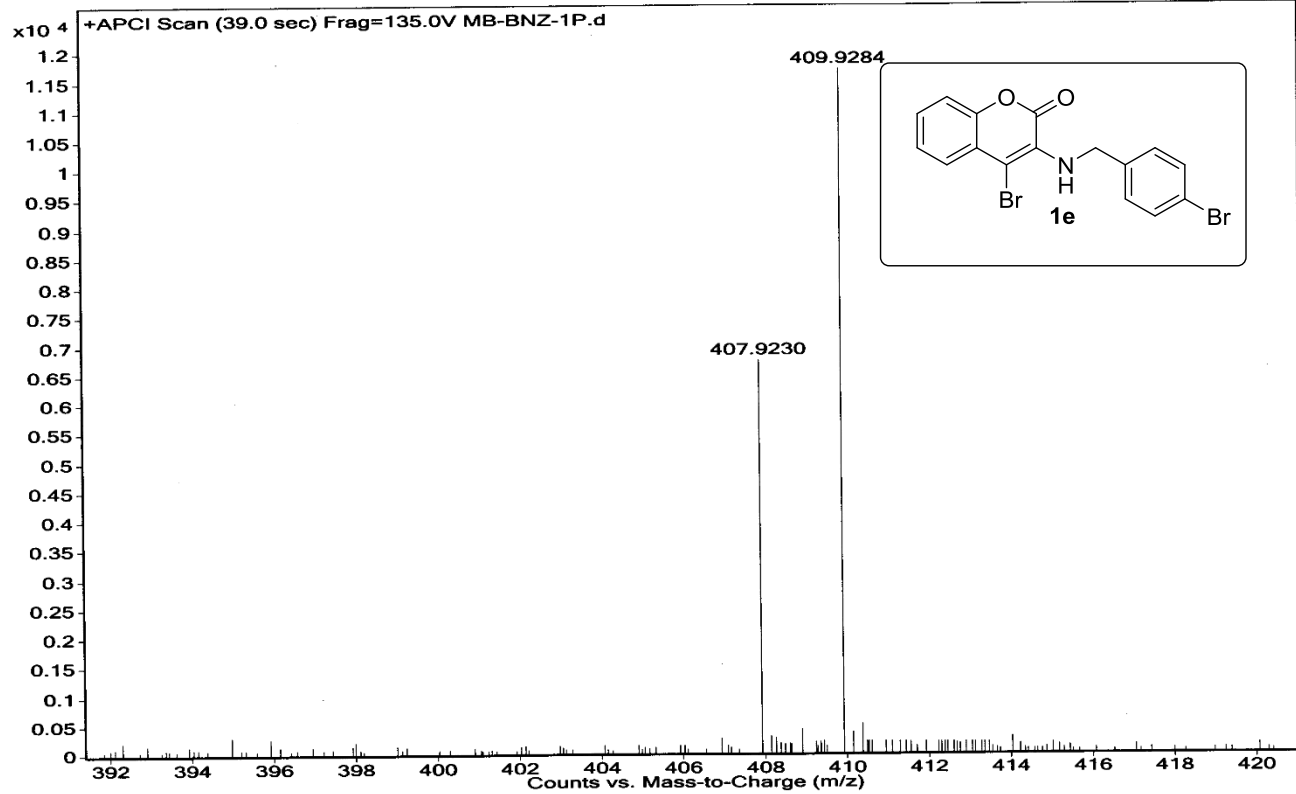

# H1 NMR Spectra of 1f

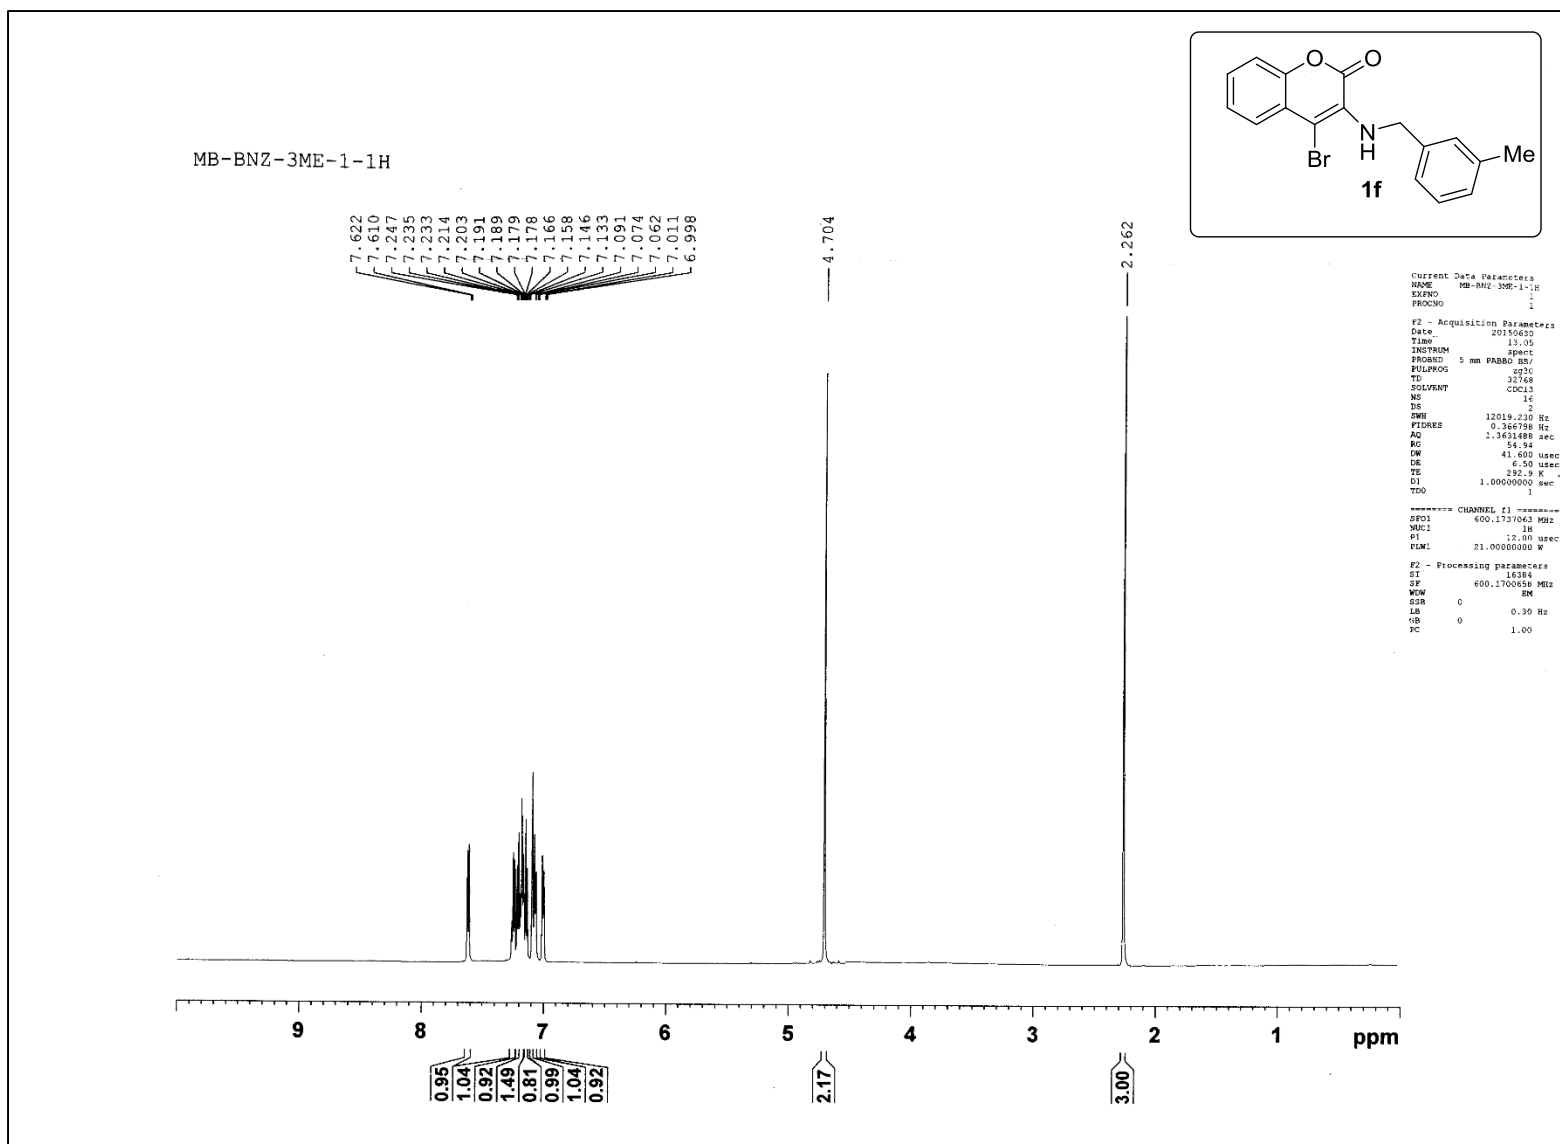

<sup>13</sup>C NMR spectra of **1f**

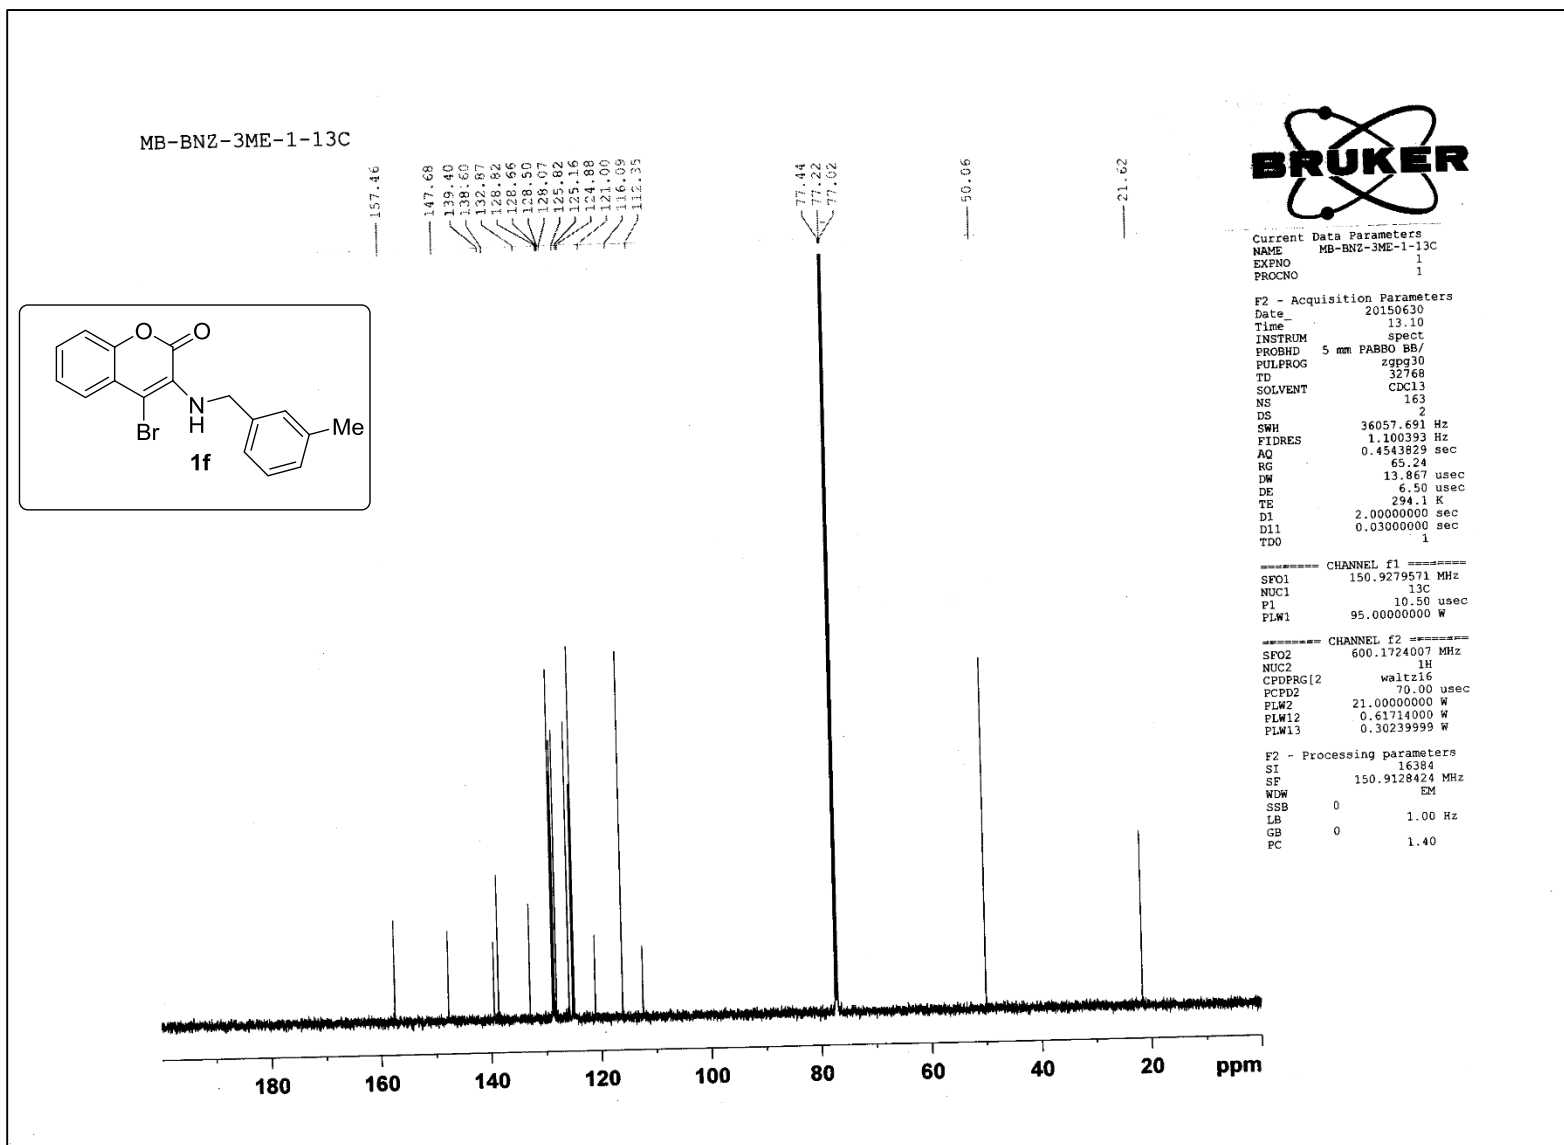

# HRMS Spectra of **1f**

|                      |                 |                    |        |                        |              |                               |                      |
|----------------------|-----------------|--------------------|--------|------------------------|--------------|-------------------------------|----------------------|
| <b>Sample Name</b>   | MB-BNZ-3-ME-1   | <b>Position</b>    | Vial 1 | <b>Instrument Name</b> | Instrument 1 | <b>User Name</b>              |                      |
| <b>Inj Vol</b>       | -10             | <b>InjPosition</b> |        | <b>SampleType</b>      | Sample       | <b>IRM Calibration Status</b> | Success              |
| <b>Data Filename</b> | MB-BNZ-3-ME-1.d | <b>ACQ Method</b>  |        | <b>Comment</b>         |              | <b>Acquired Time</b>          | 8/13/2015 3:18:06 PM |

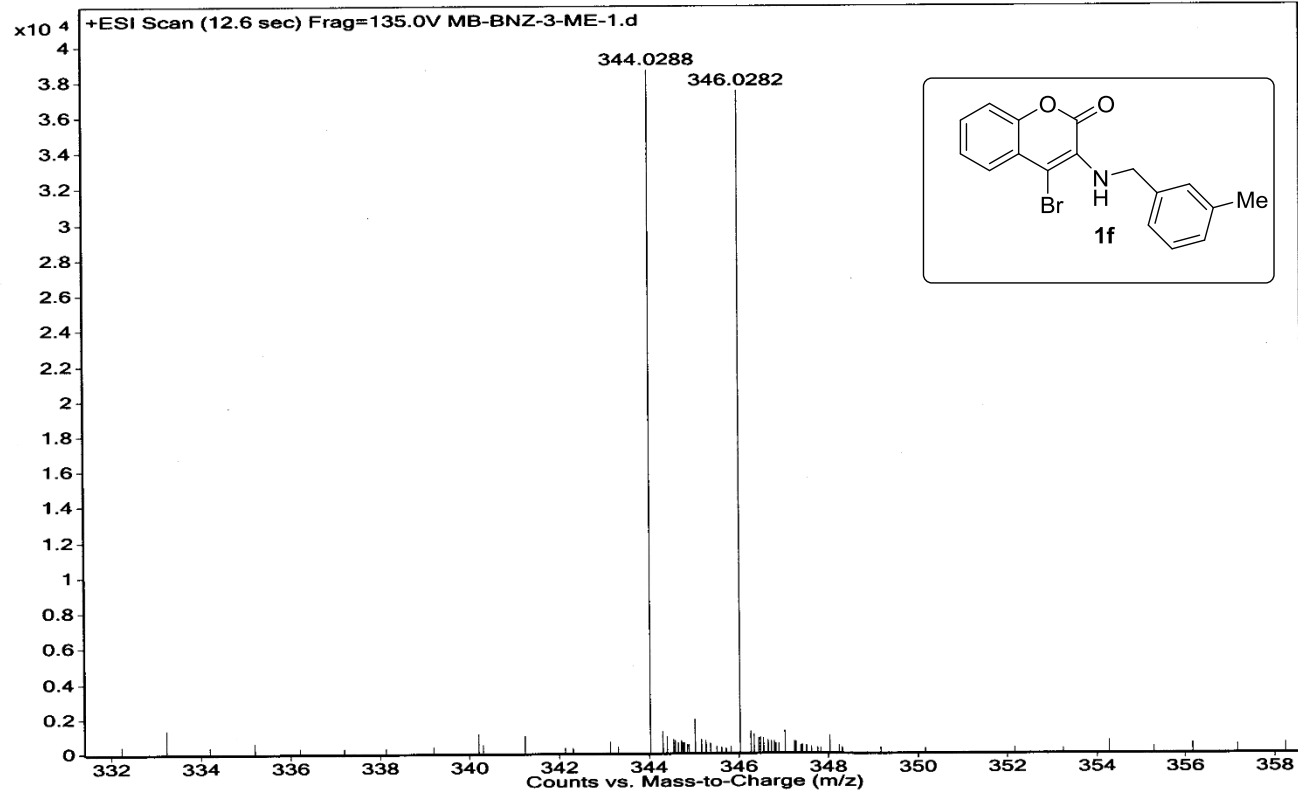



<sup>1</sup>H NMR spectra of **1g**

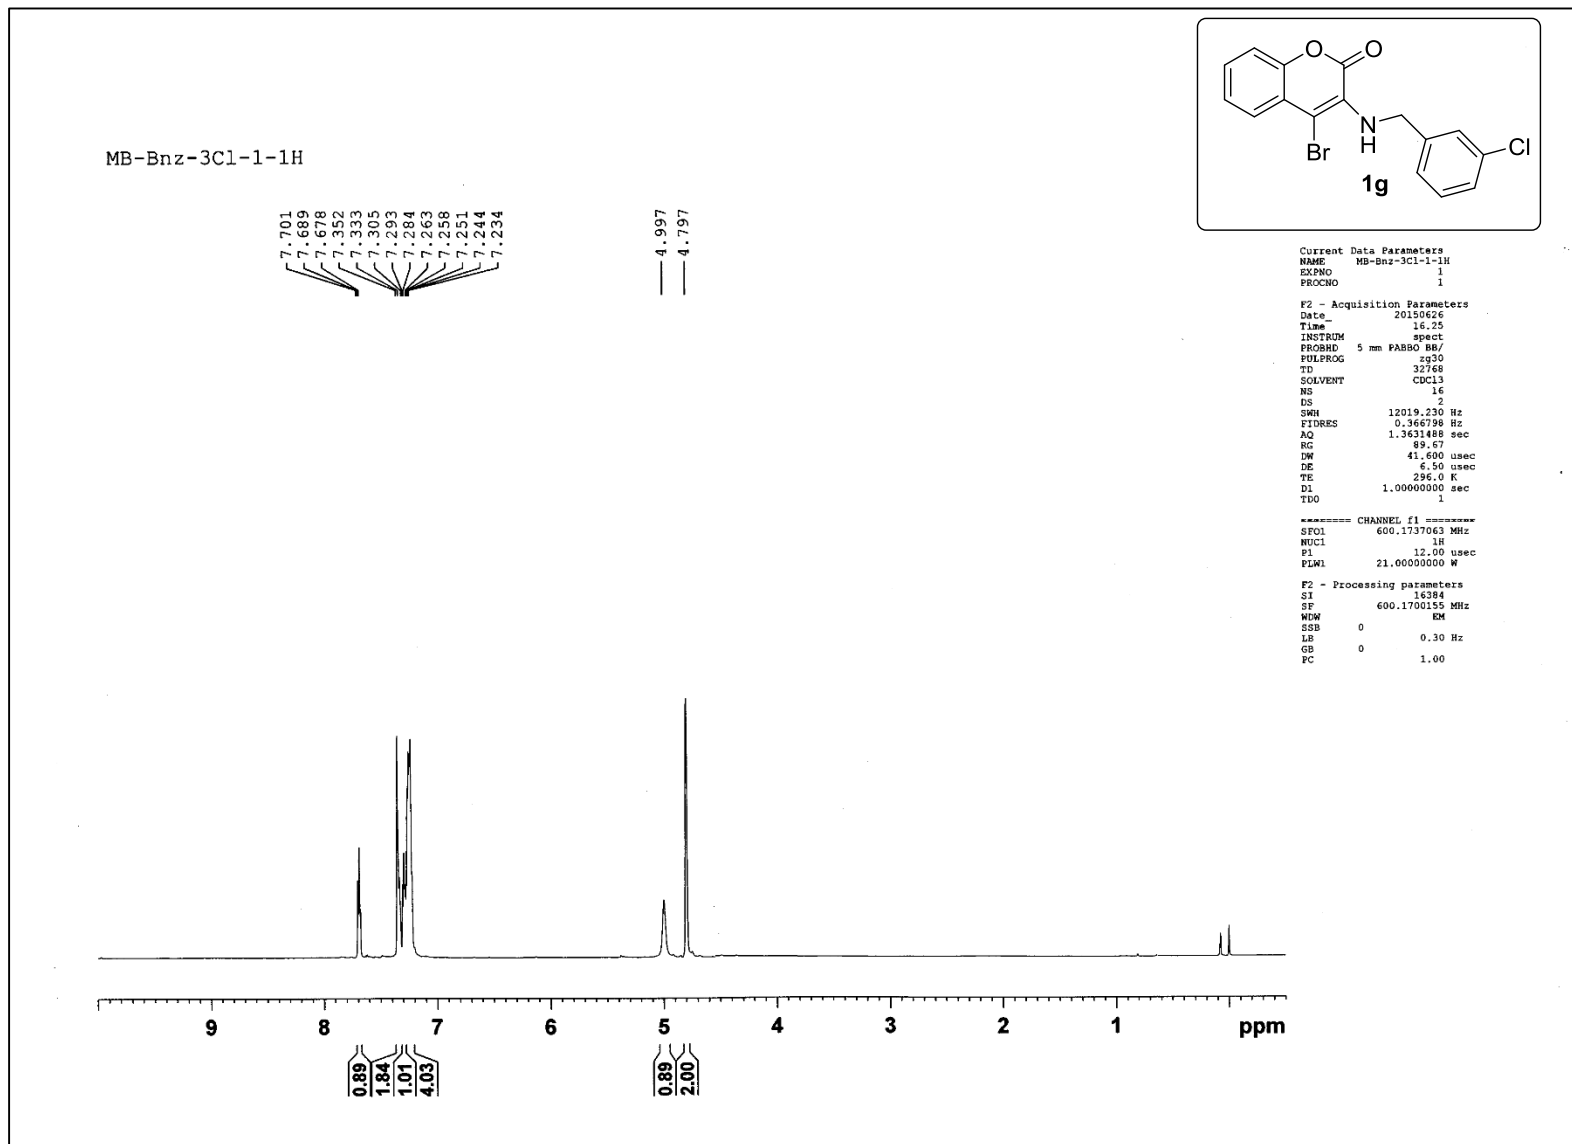

<sup>13</sup>C NMR spectra of **1g**

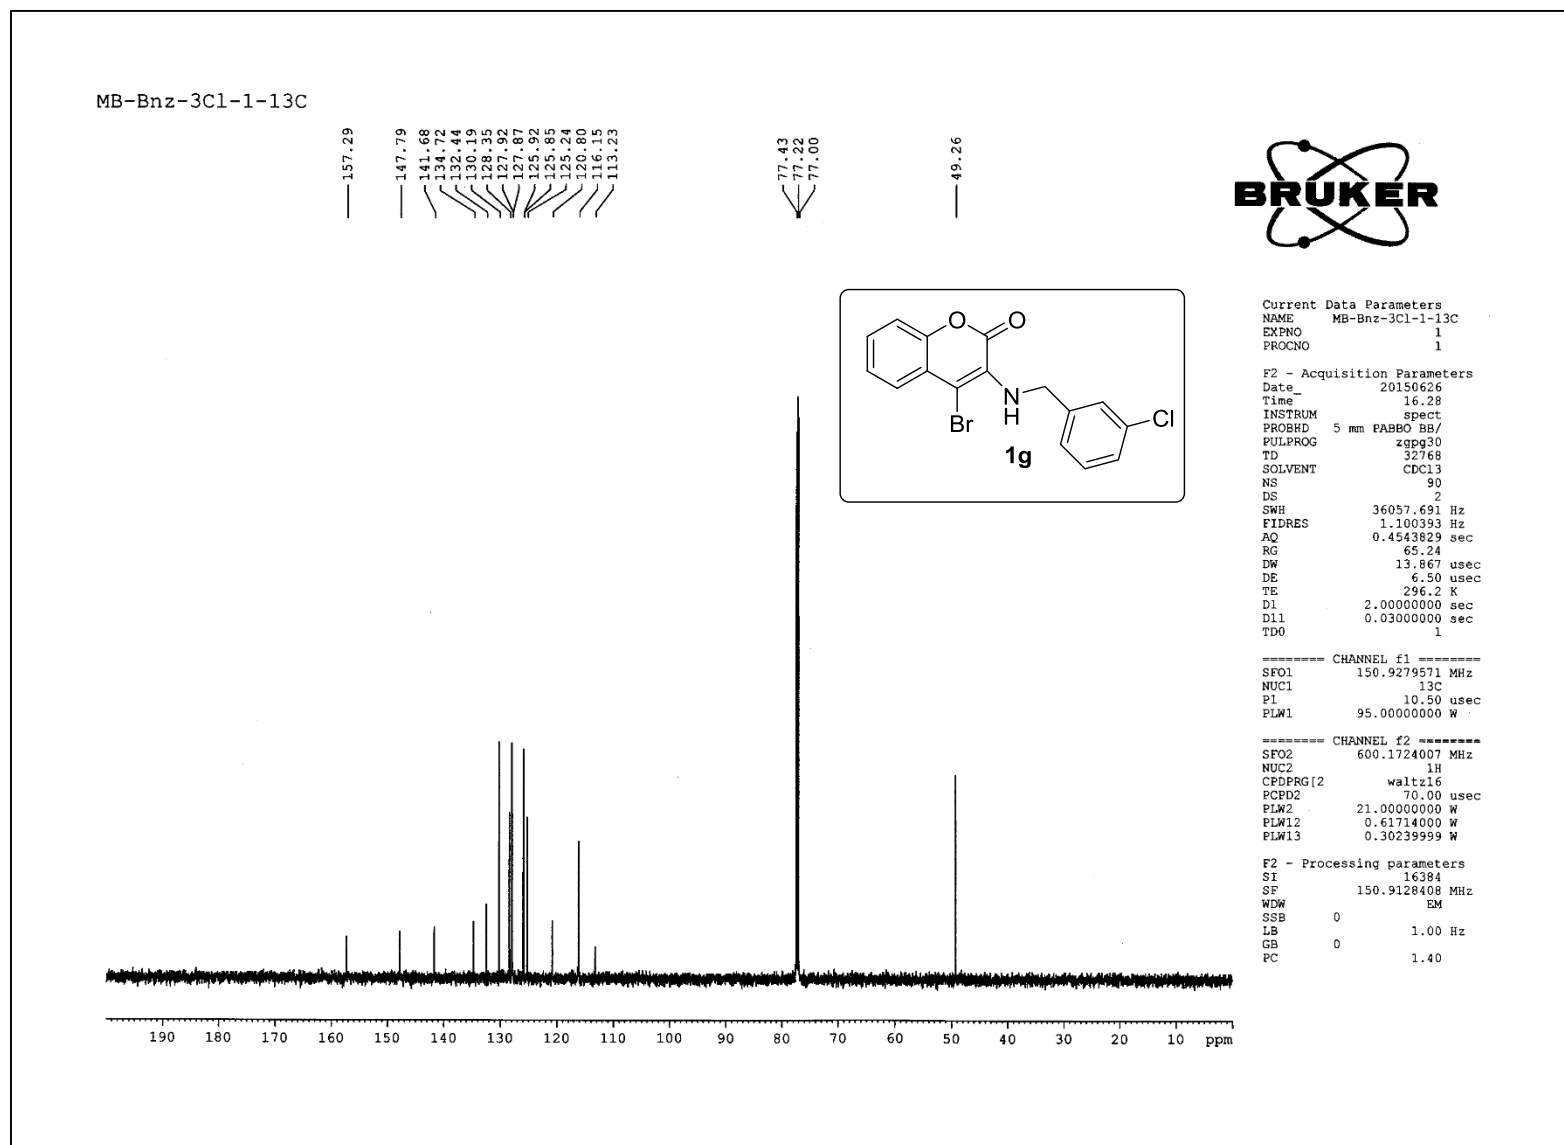

# HRMS Spectra of **1g**

Sample Name  
Inj Vol  
Data Filename

Position  
InjPosition  
ACQ Method

Instrument Name  
SampleType  
Comment

User Name  
IRM Calibration Status  
Acquired Time

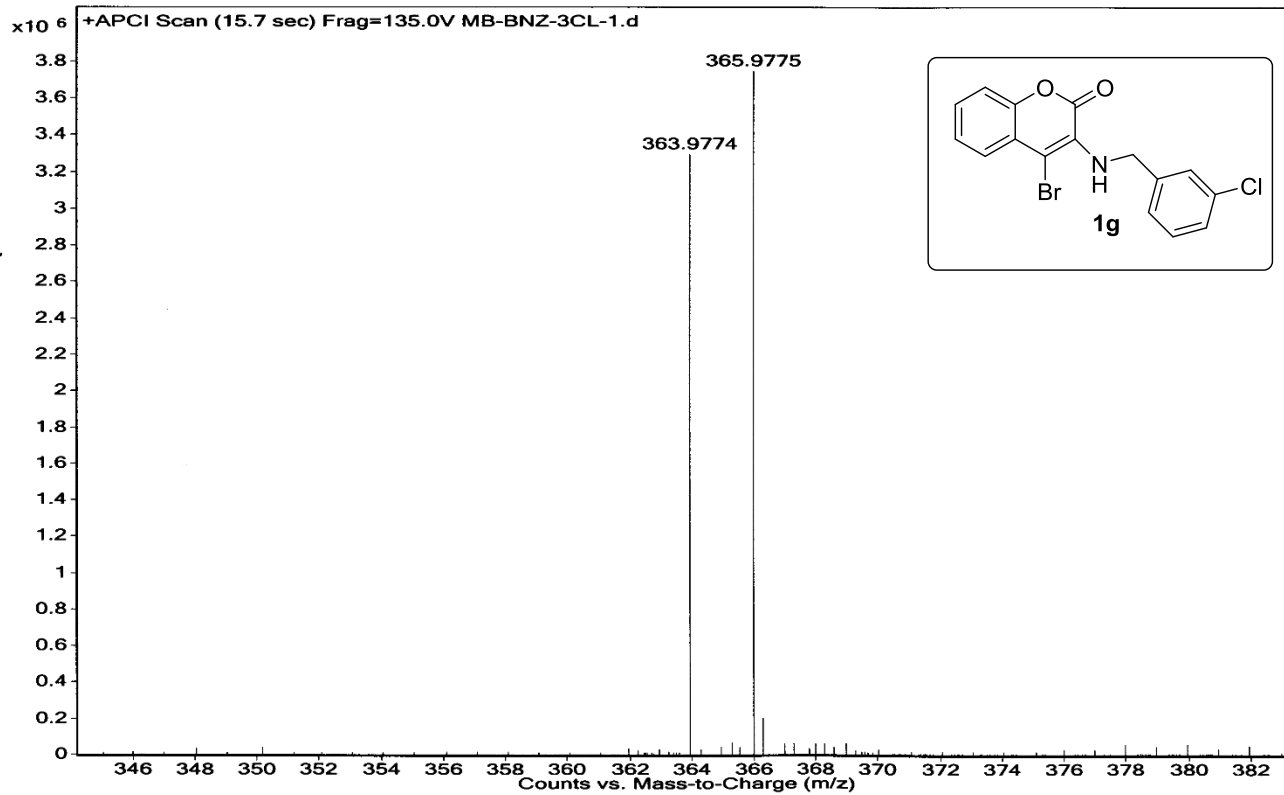

# <sup>1</sup>H NMR spectra of **1h**

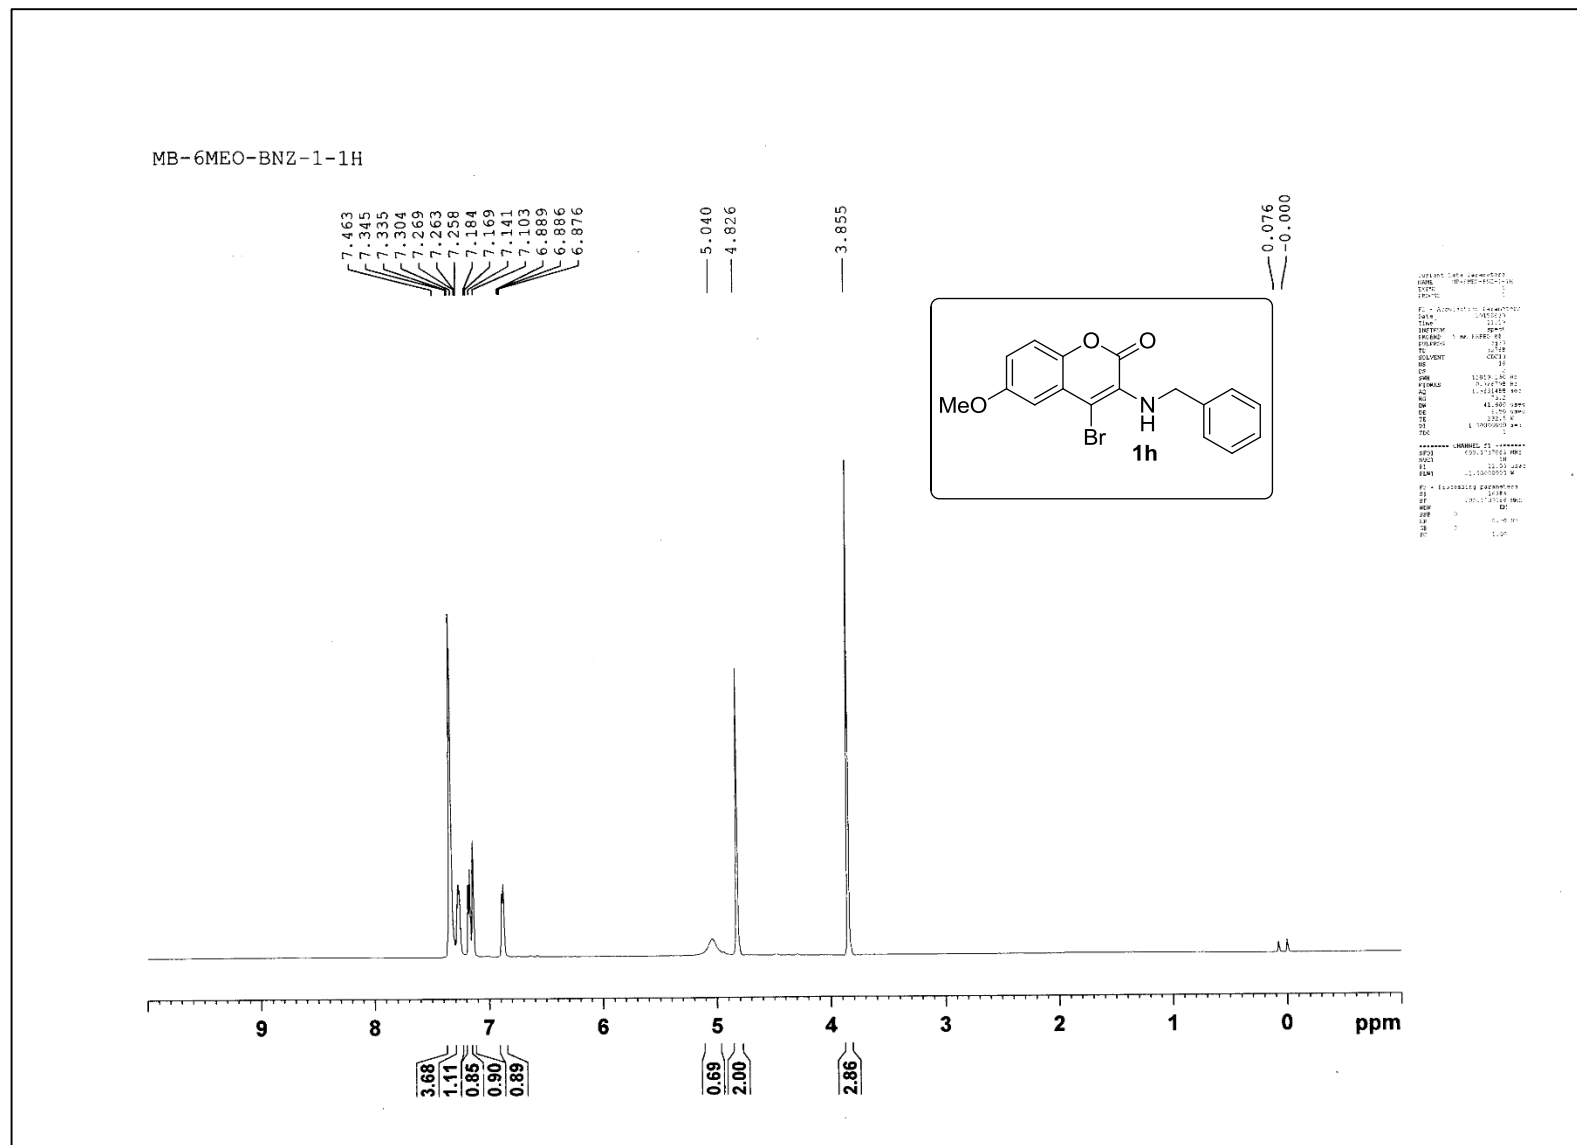

<sup>13</sup>C NMR of spectra of **1h**

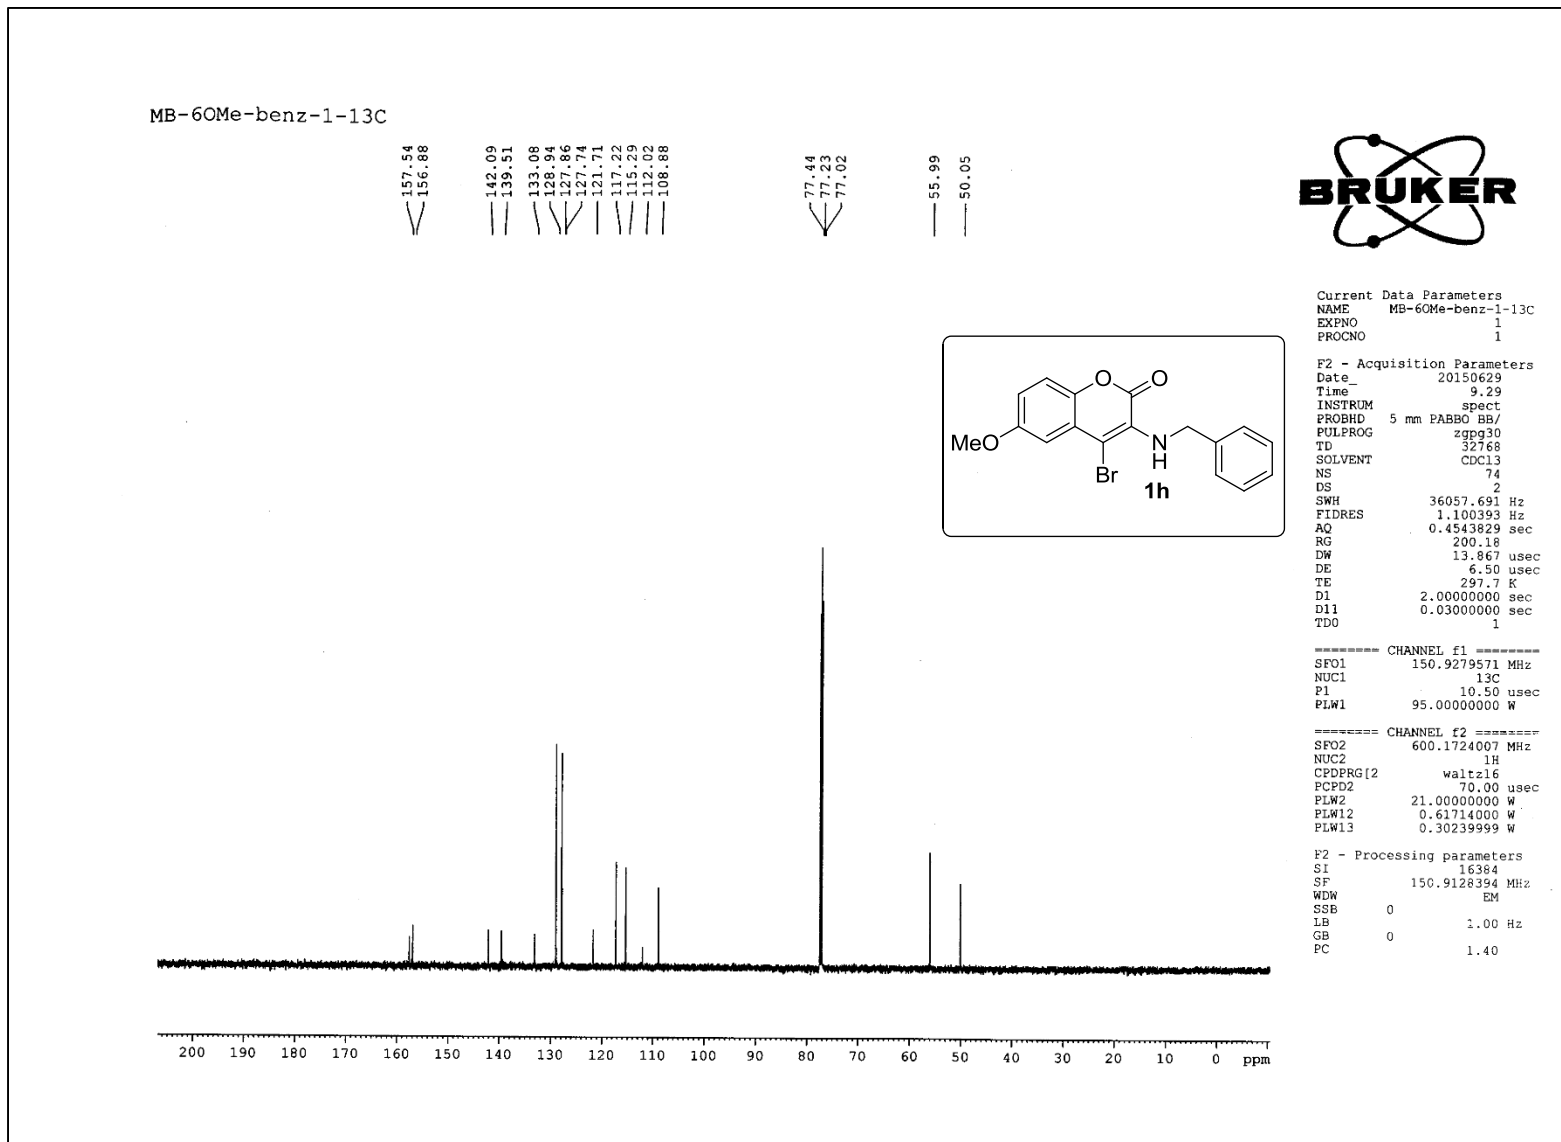

# HRMS spectra of **1h**

| Sample Name   | Position    | Instrument Name | User Name              |
|---------------|-------------|-----------------|------------------------|
| Inj Vol       | InjPosition | SampleType      | IRM Calibration Status |
| Data Filename | ACQ Method  | Comment         | Acquired Time          |

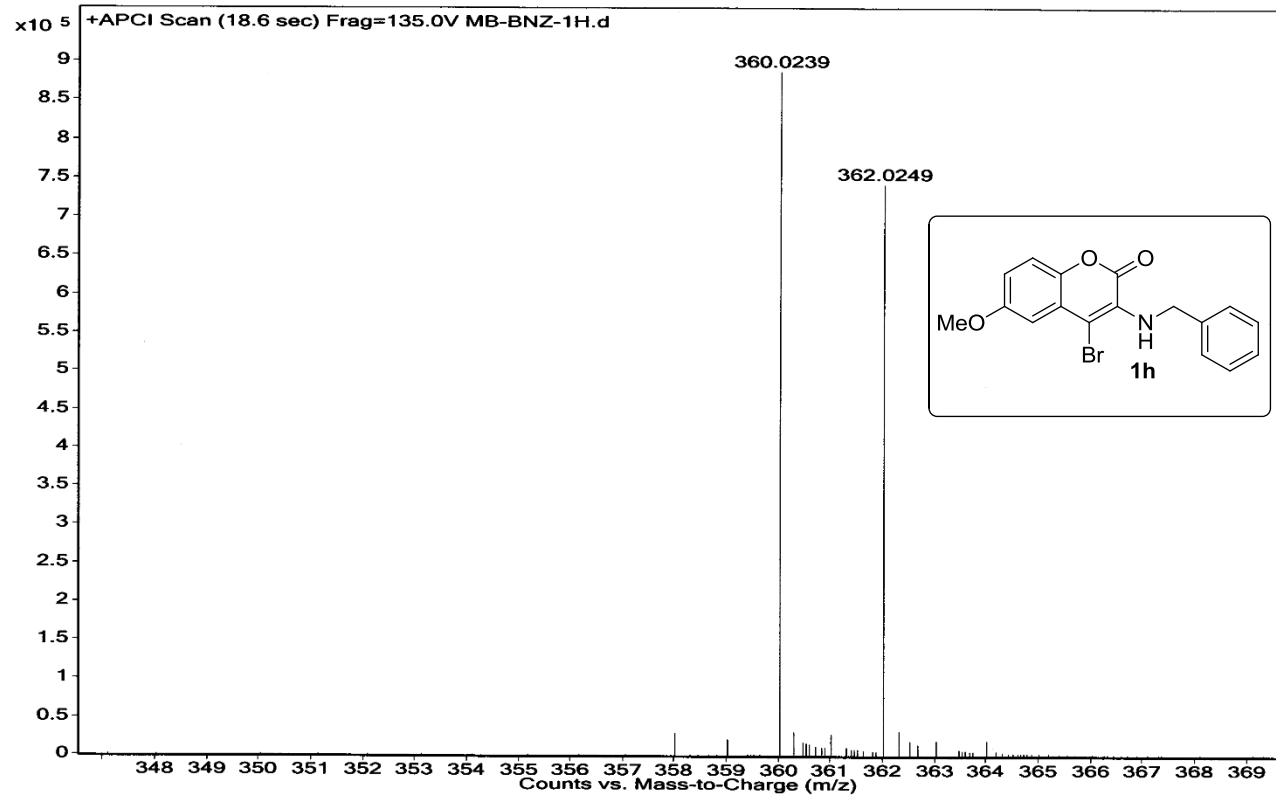

# <sup>1</sup>H NMR spectra of **1i**

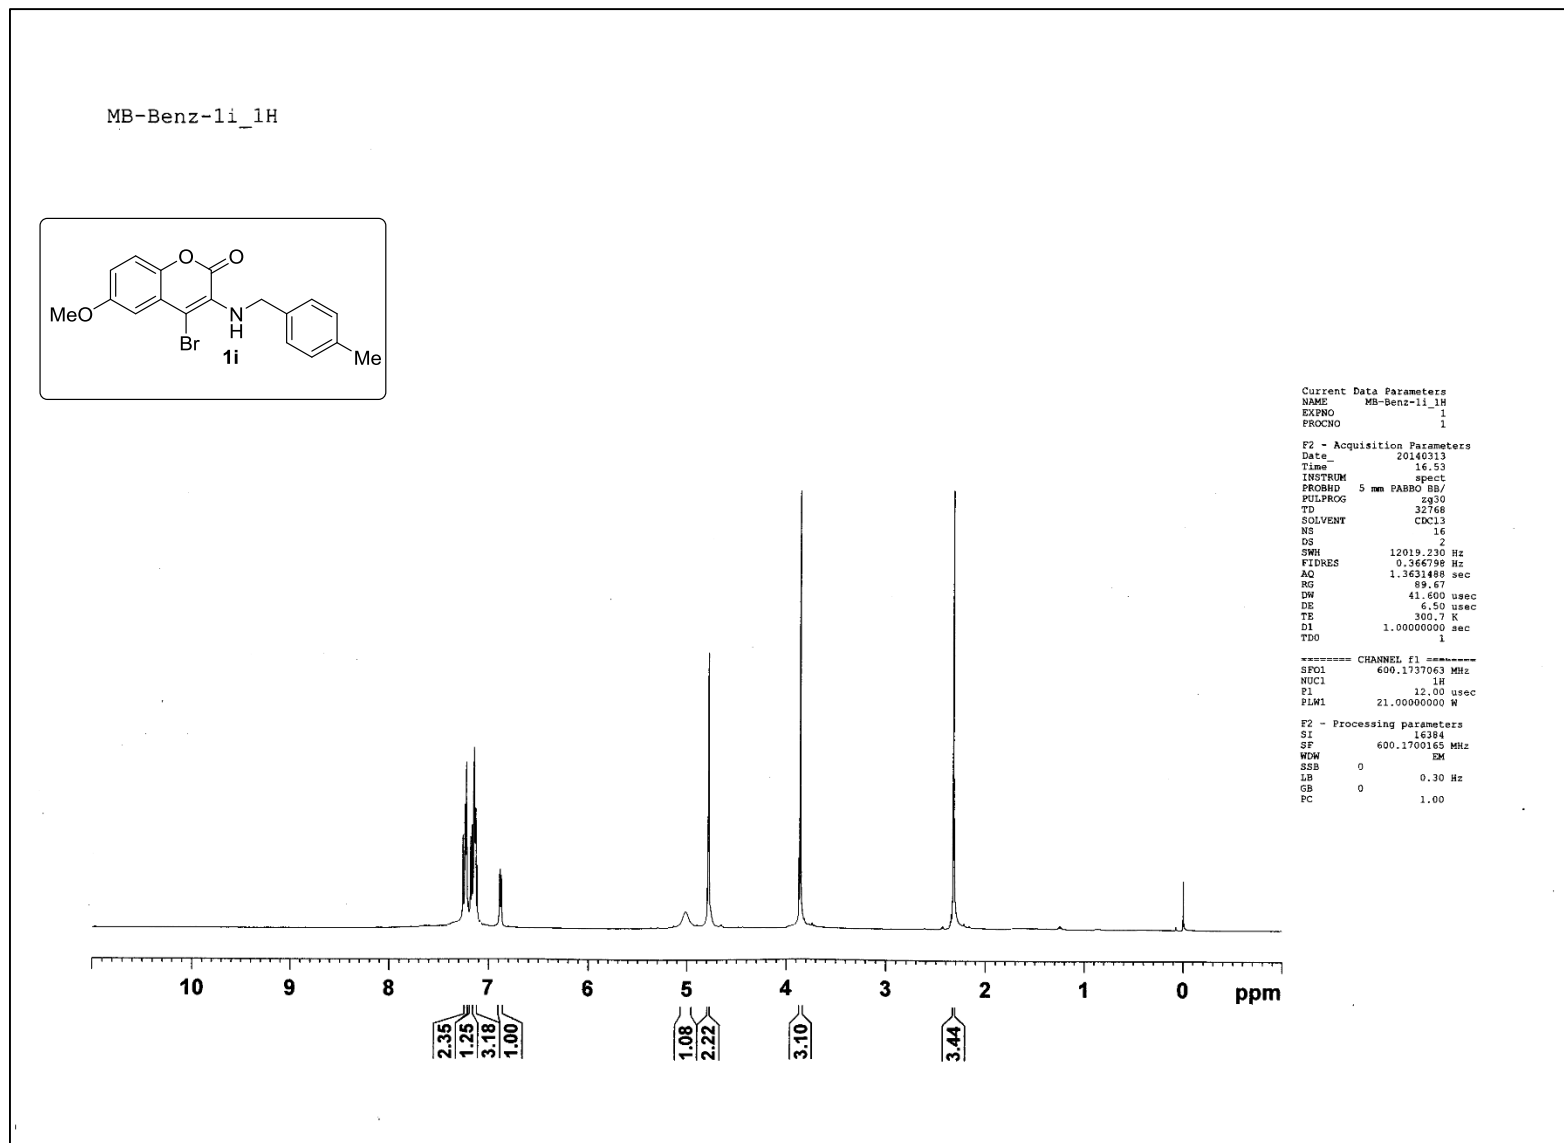

<sup>13</sup>C NMR spectra of **1i**

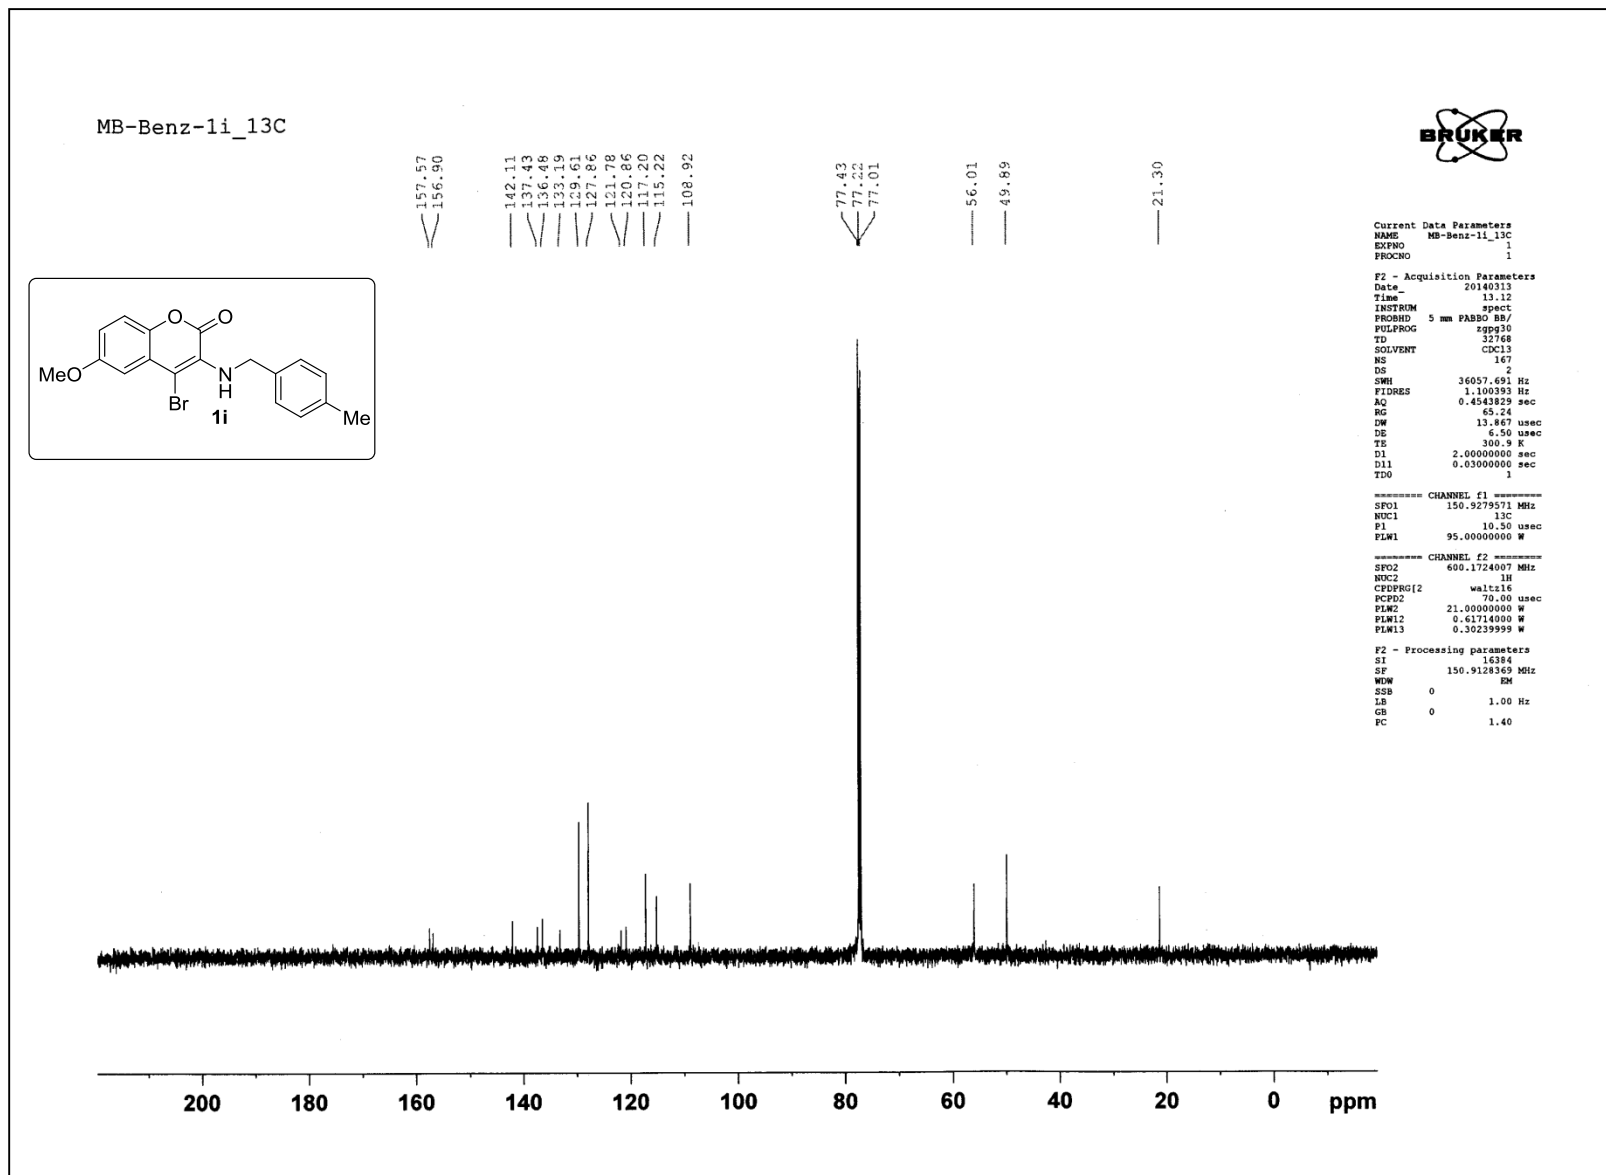



# HRMS spectra of **1i**

|                      |             |                    |        |                        |              |                               |                      |
|----------------------|-------------|--------------------|--------|------------------------|--------------|-------------------------------|----------------------|
| <b>Sample Name</b>   | MB-BNZ-1I   | <b>Position</b>    | Vial 1 | <b>Instrument Name</b> | Instrument 1 | <b>User Name</b>              |                      |
| <b>Inj Vol</b>       | -10         | <b>InjPosition</b> |        | <b>SampleType</b>      | Sample       | <b>IRM Calibration Status</b> | Success              |
| <b>Data Filename</b> | MB-BNZ-1I.d | <b>ACQ Method</b>  |        | <b>Comment</b>         |              | <b>Acquired Time</b>          | 8/13/2015 3:14:53 PM |

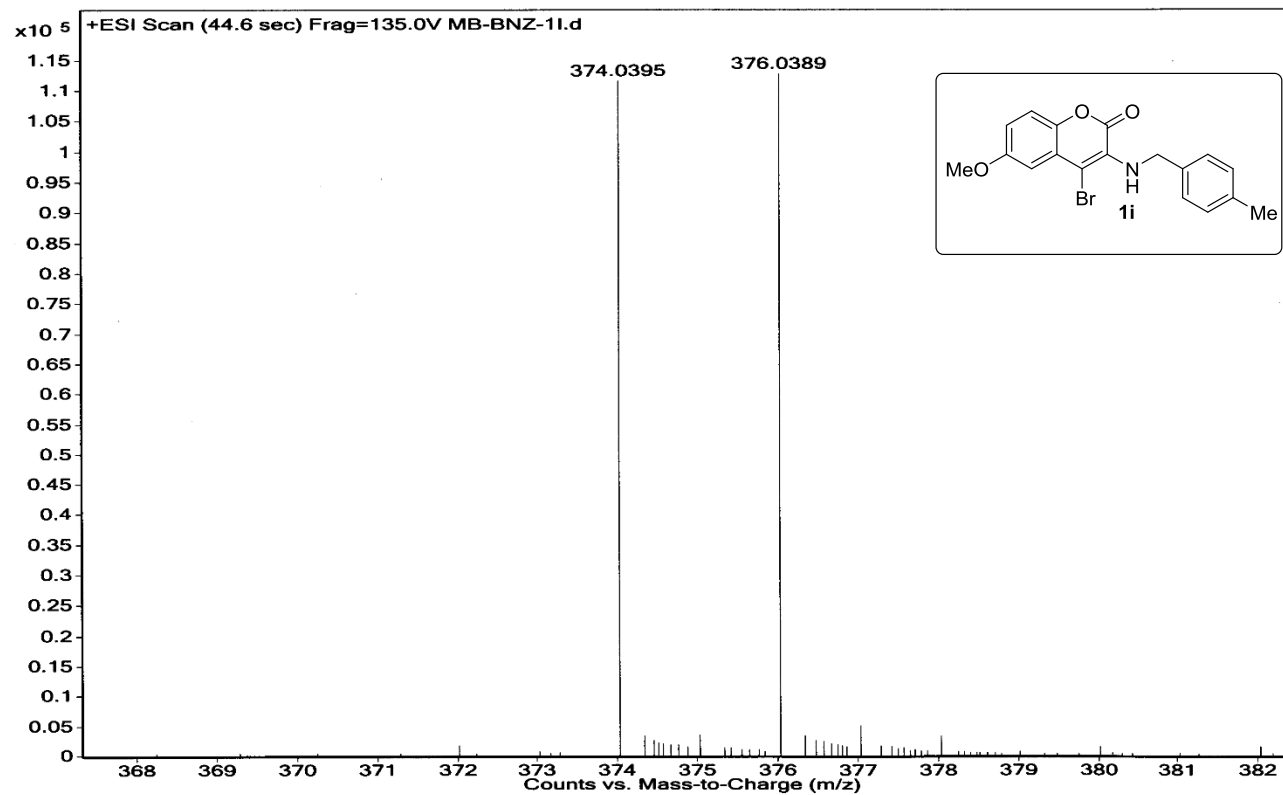

$^1\text{H}$  NMR spectra of **1j**

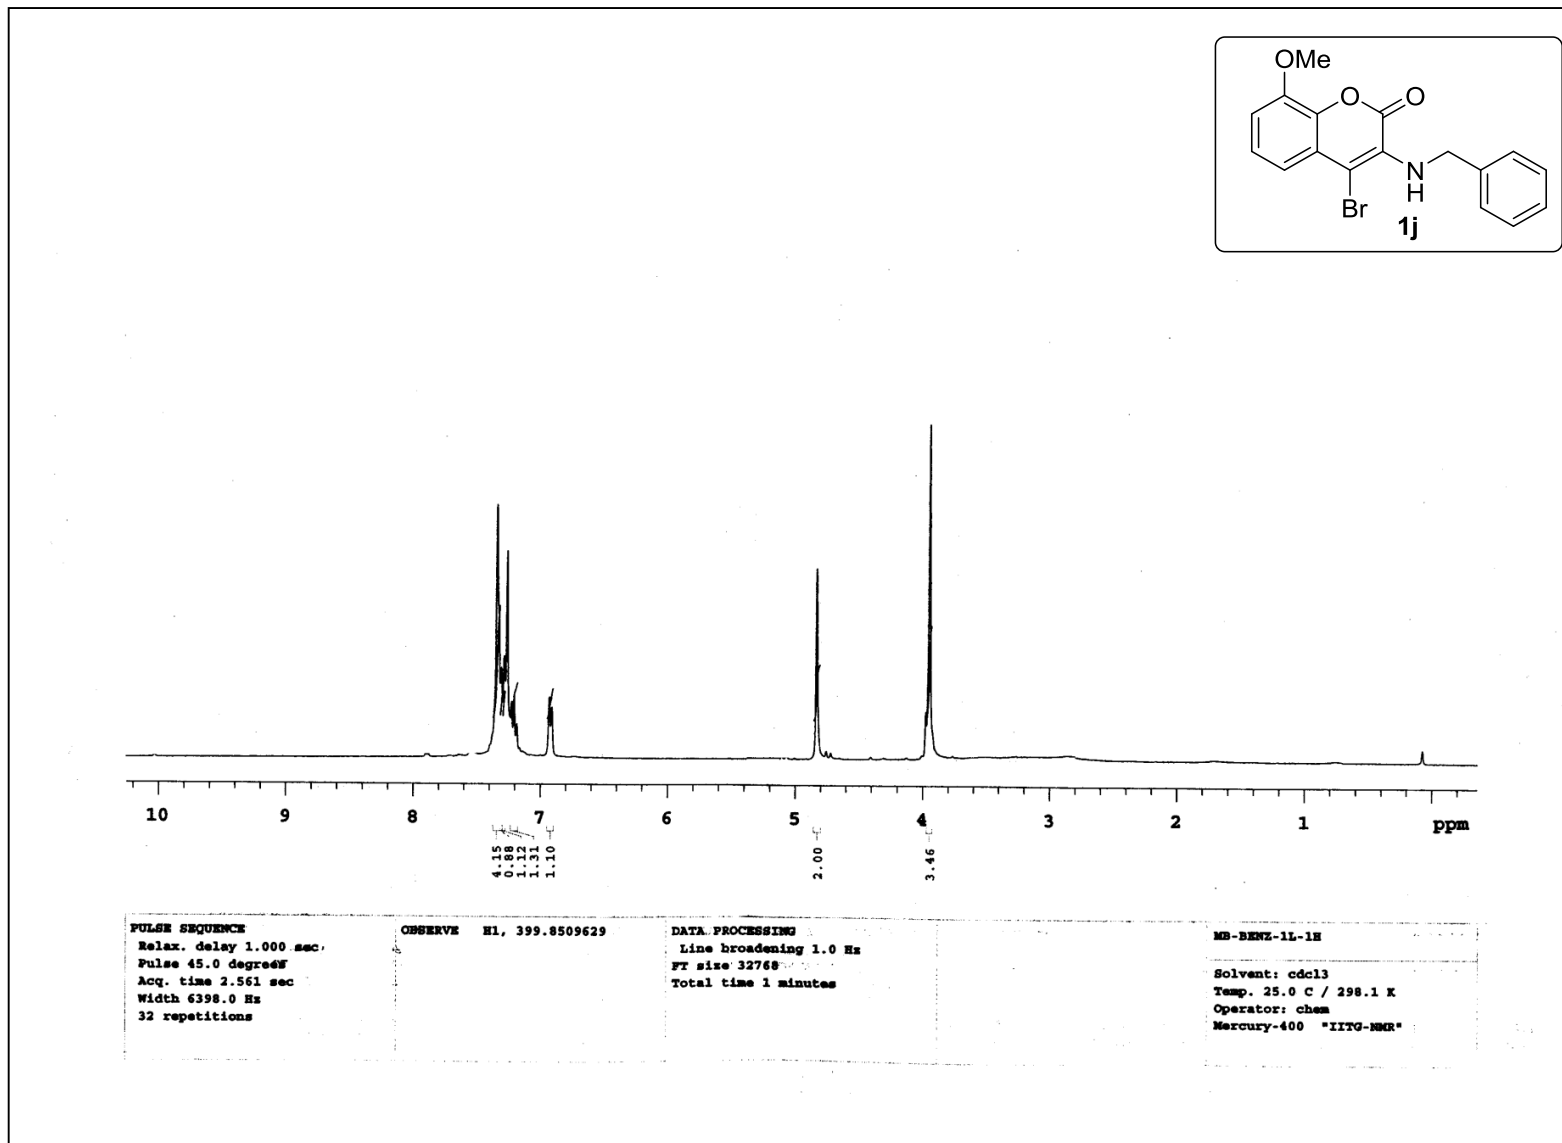

<sup>13</sup>C NMR spectra of **1j**

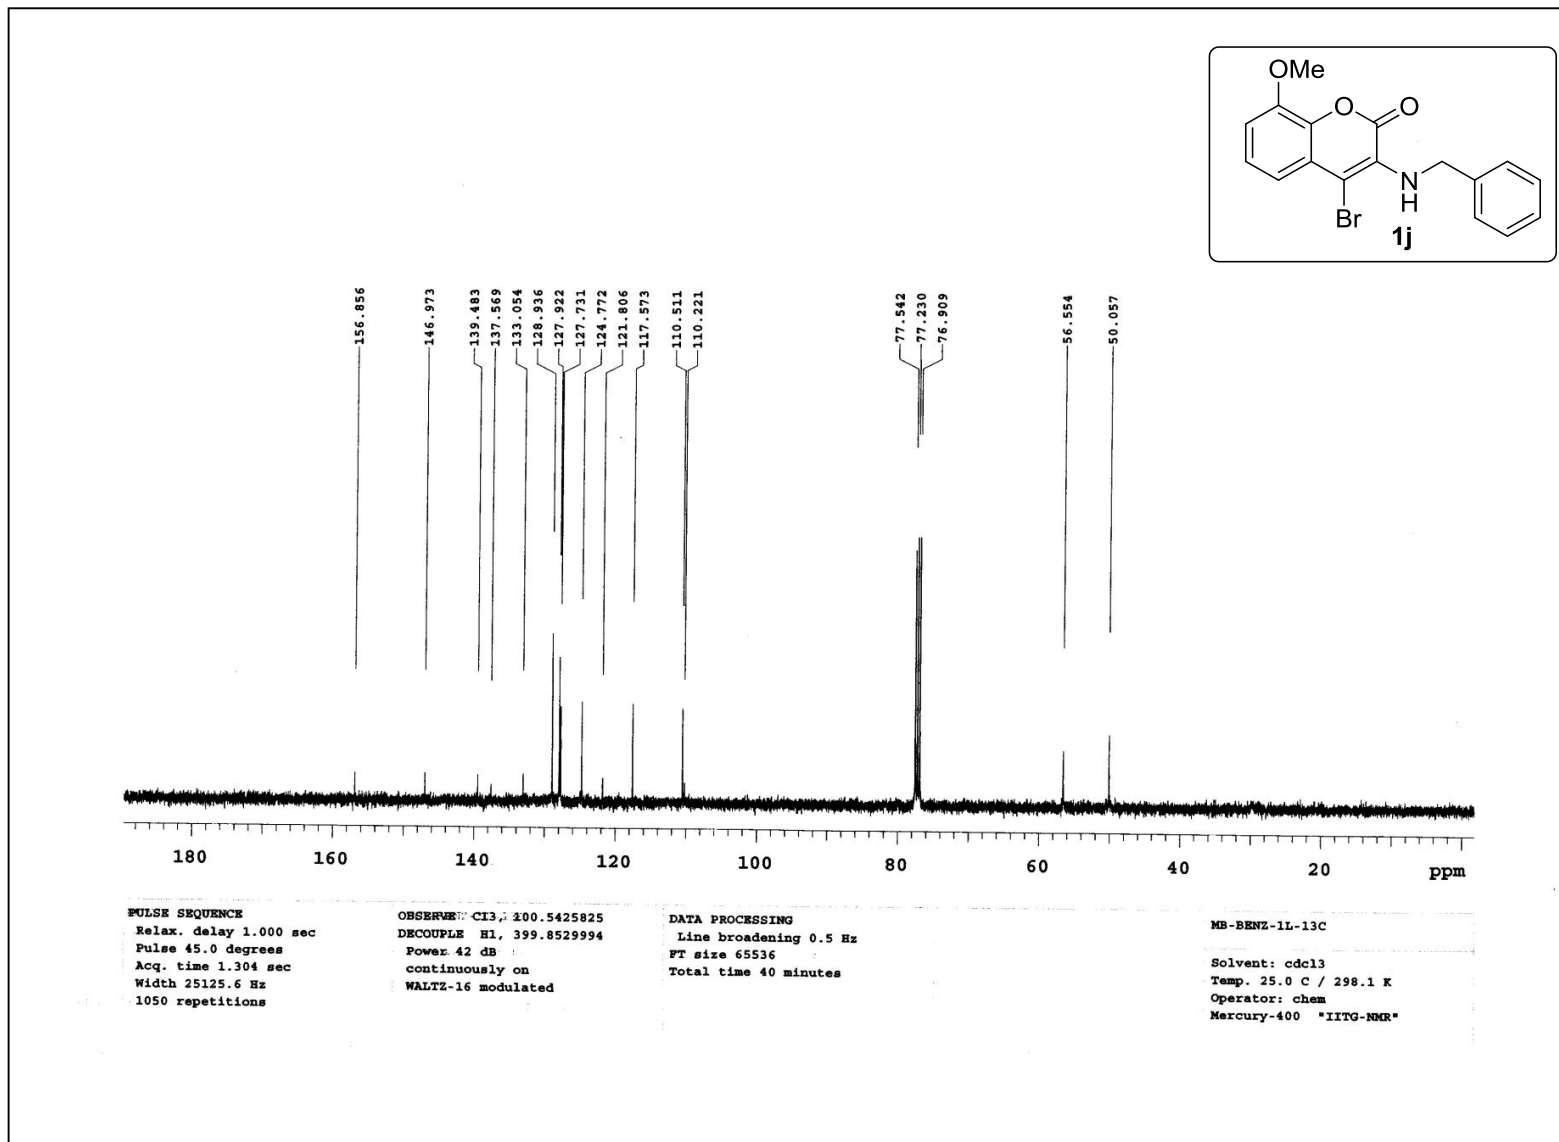

# HRMS spectra of 1j

| Sample Name   | Position    | Instrument Name | User Name              |
|---------------|-------------|-----------------|------------------------|
| Inj Vol       | InjPosition | SampleType      | IRM Calibration Status |
| Data Filename | ACQ Method  | Comment         | Acquired Time          |

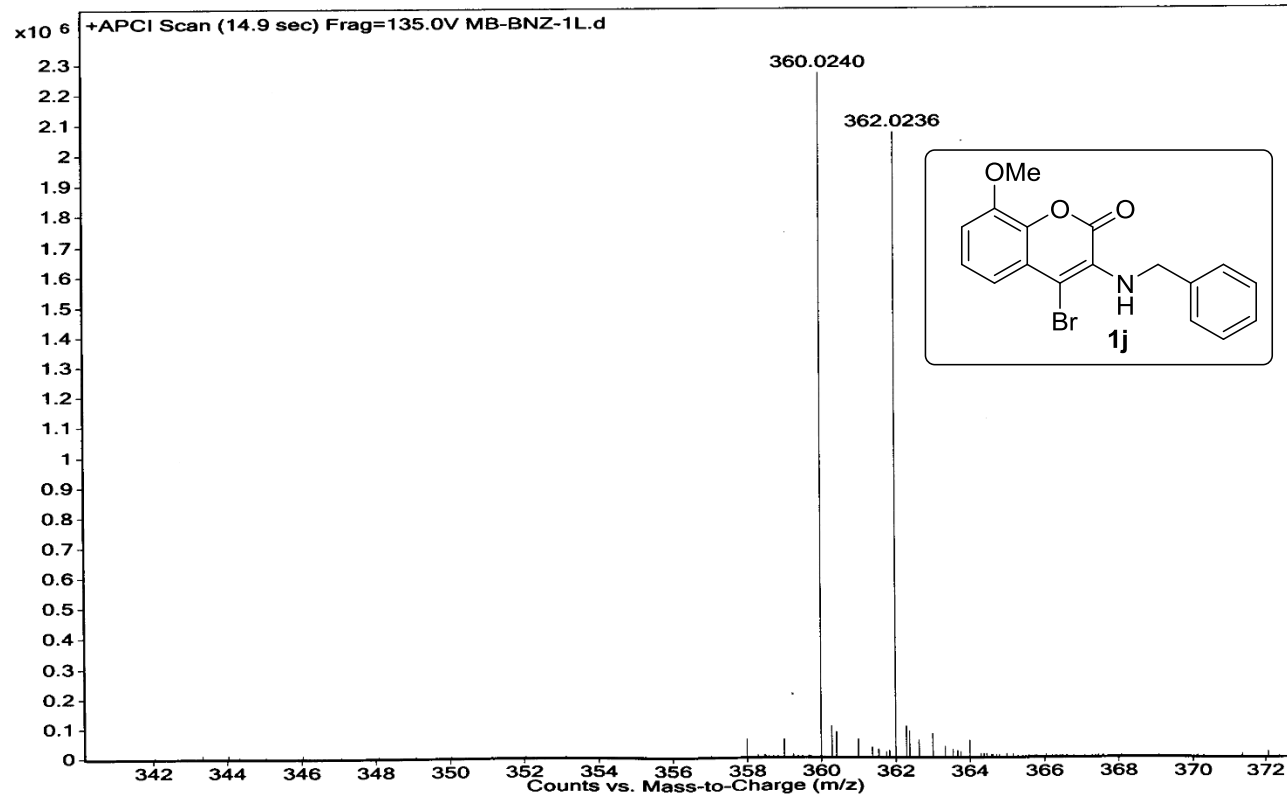

# <sup>1</sup>H NMR spectra of **1k**

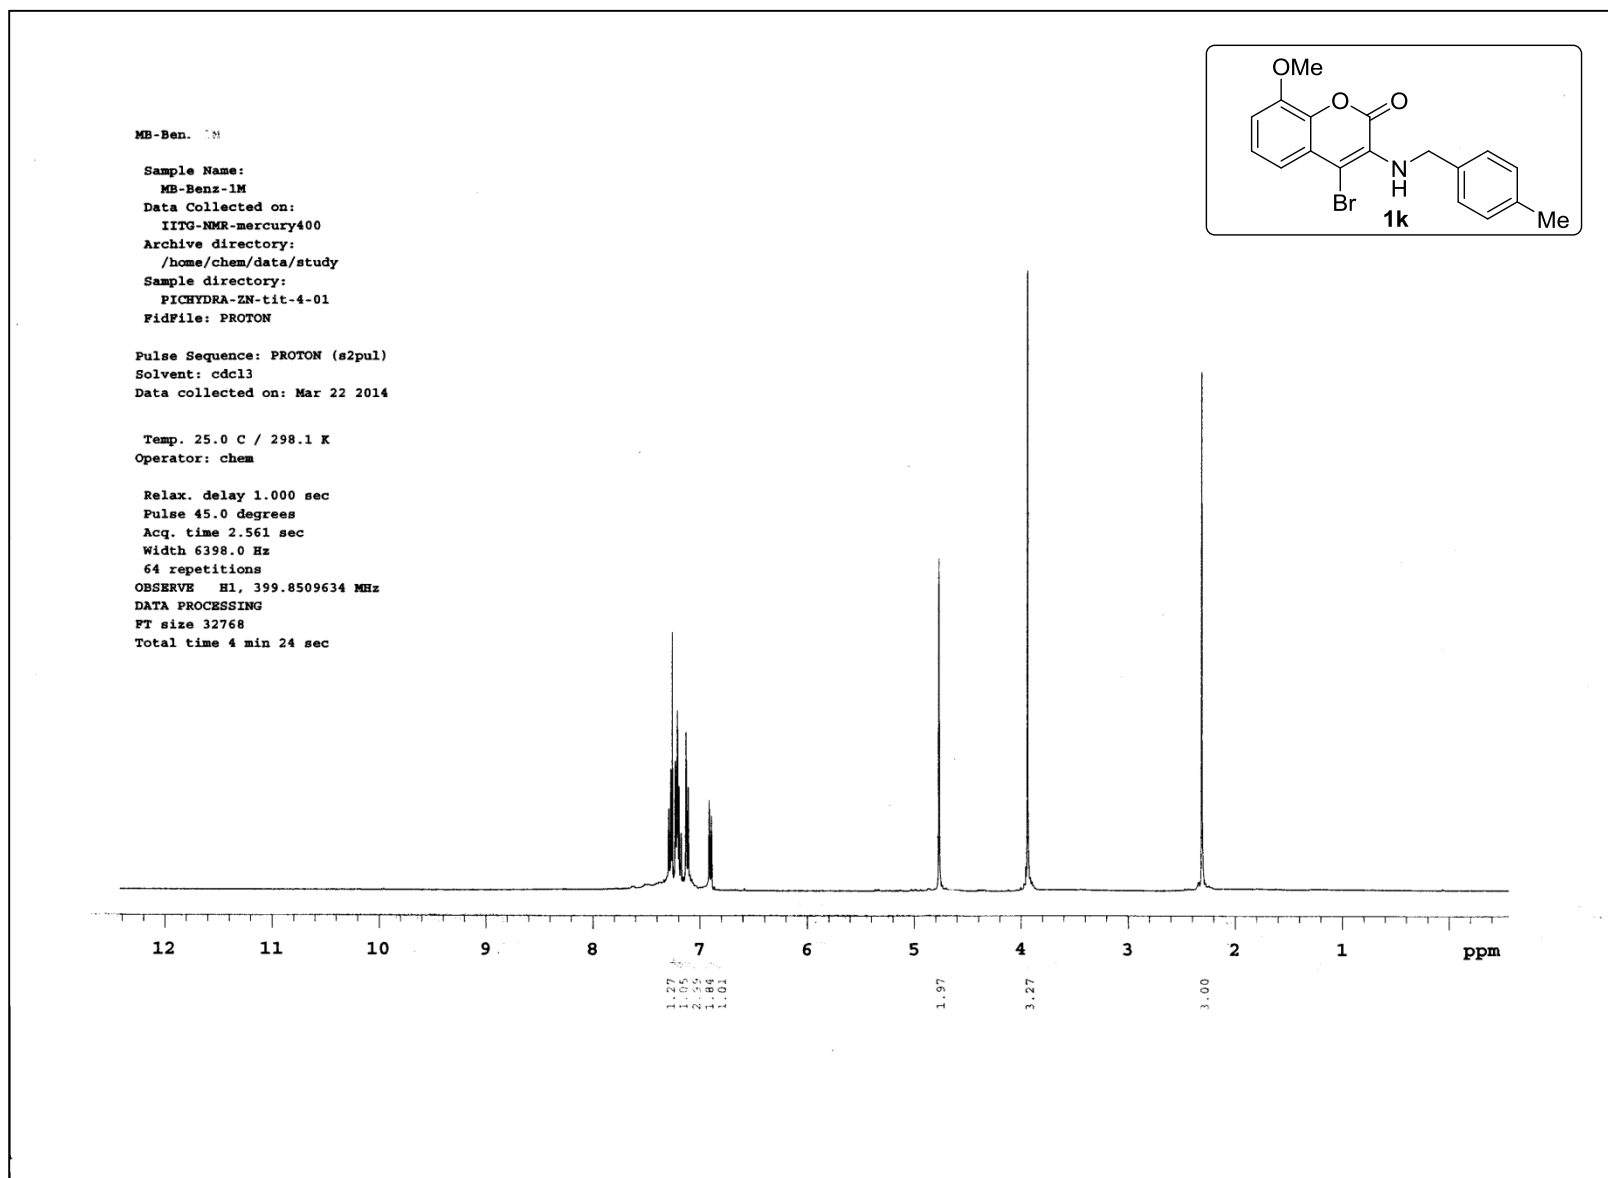

<sup>13</sup>C NMR spectra of **1k**

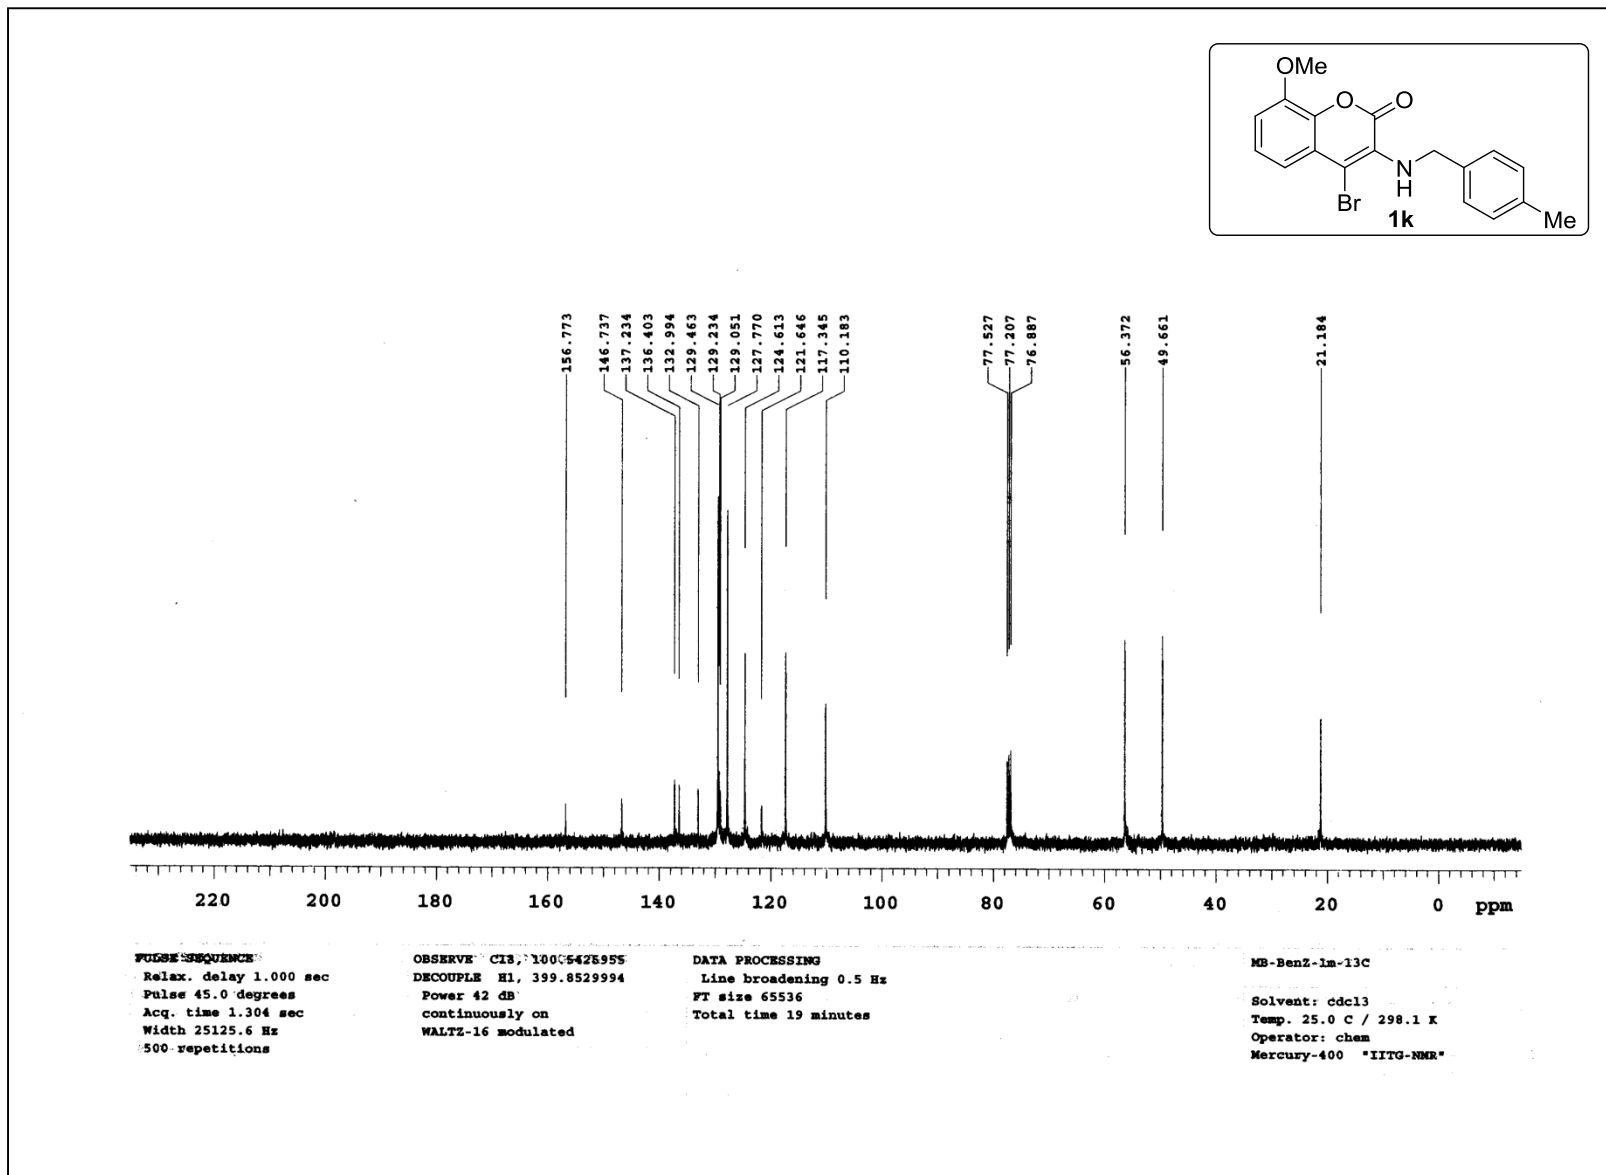

# HRMS spectra of **1k**

Sample Name  
Inj Vol  
Data Filename

Position  
InjPosition  
ACQ Method

Instrument Name  
SampleType  
Comment

User Name  
IRM Calibration Status  
Acquired Time

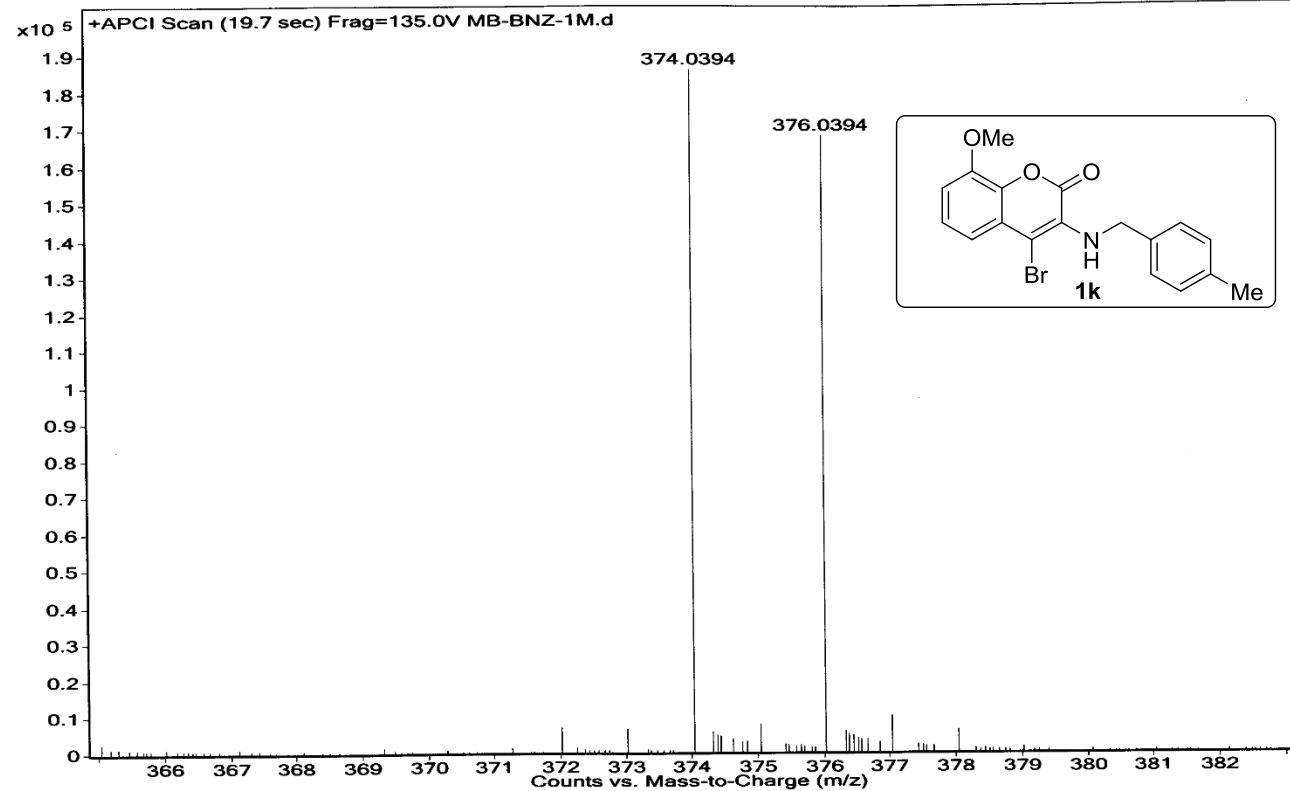

# <sup>1</sup>H NMR spectra of **11**

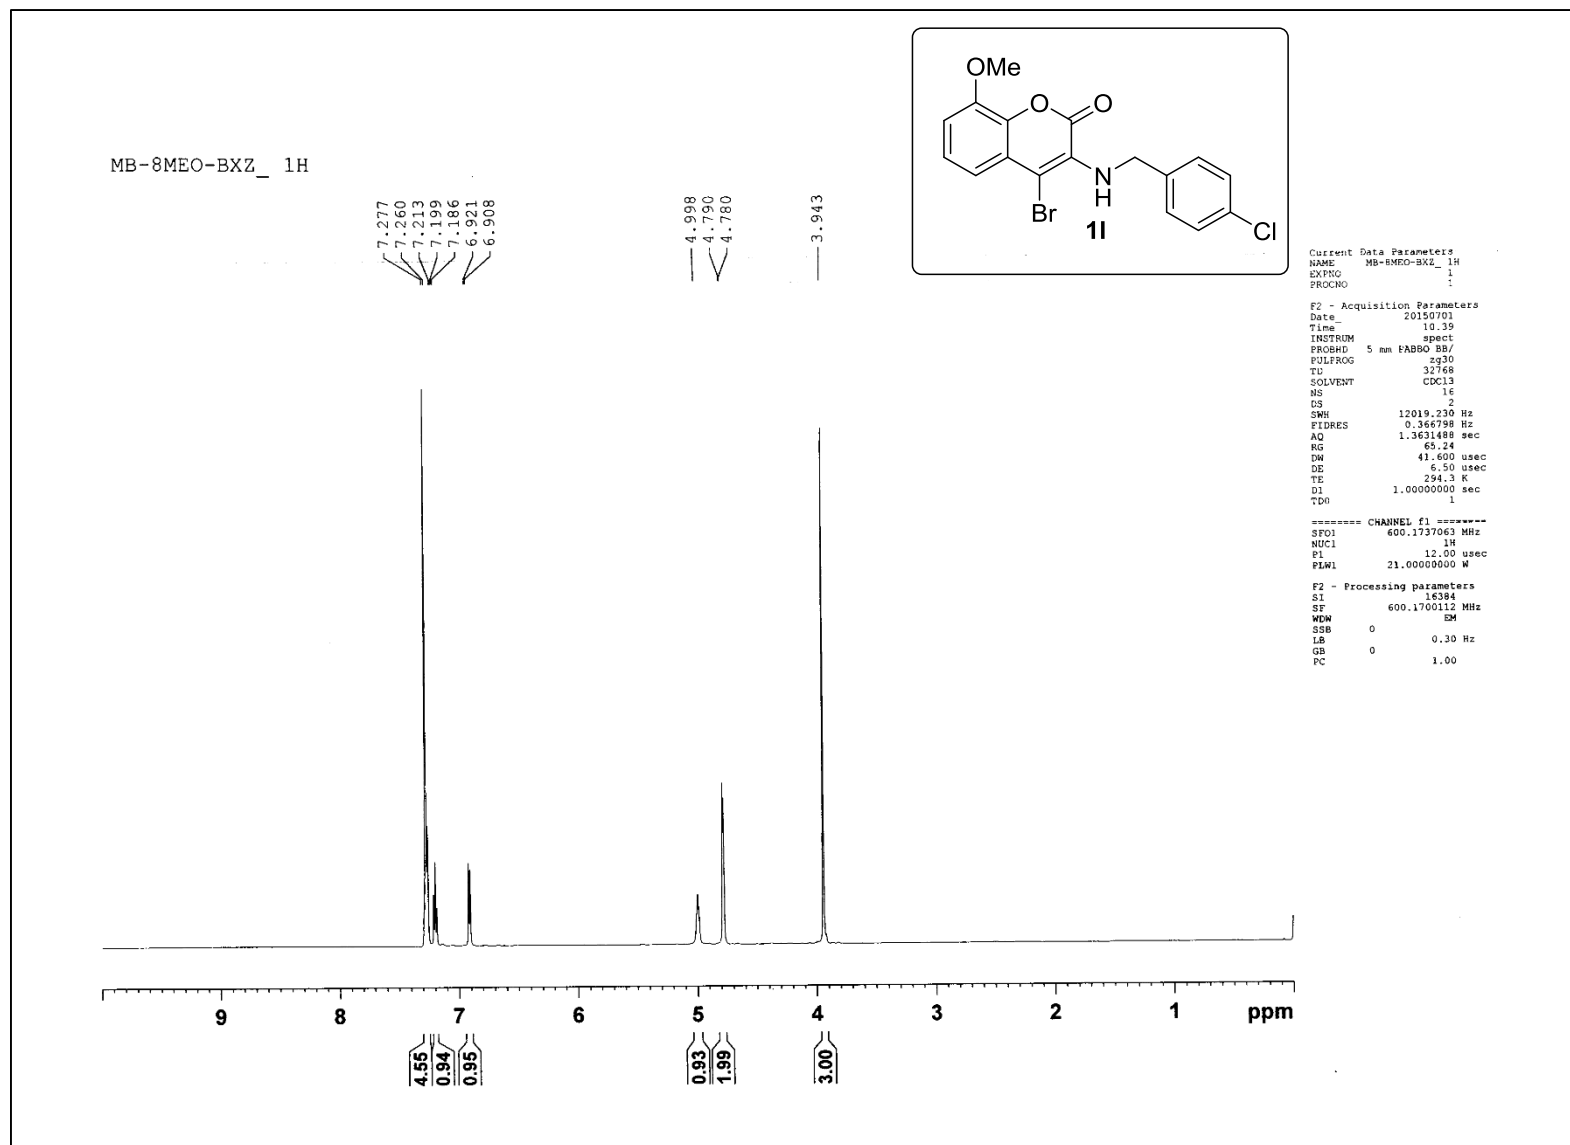



<sup>13</sup>C NMR spectra of 11

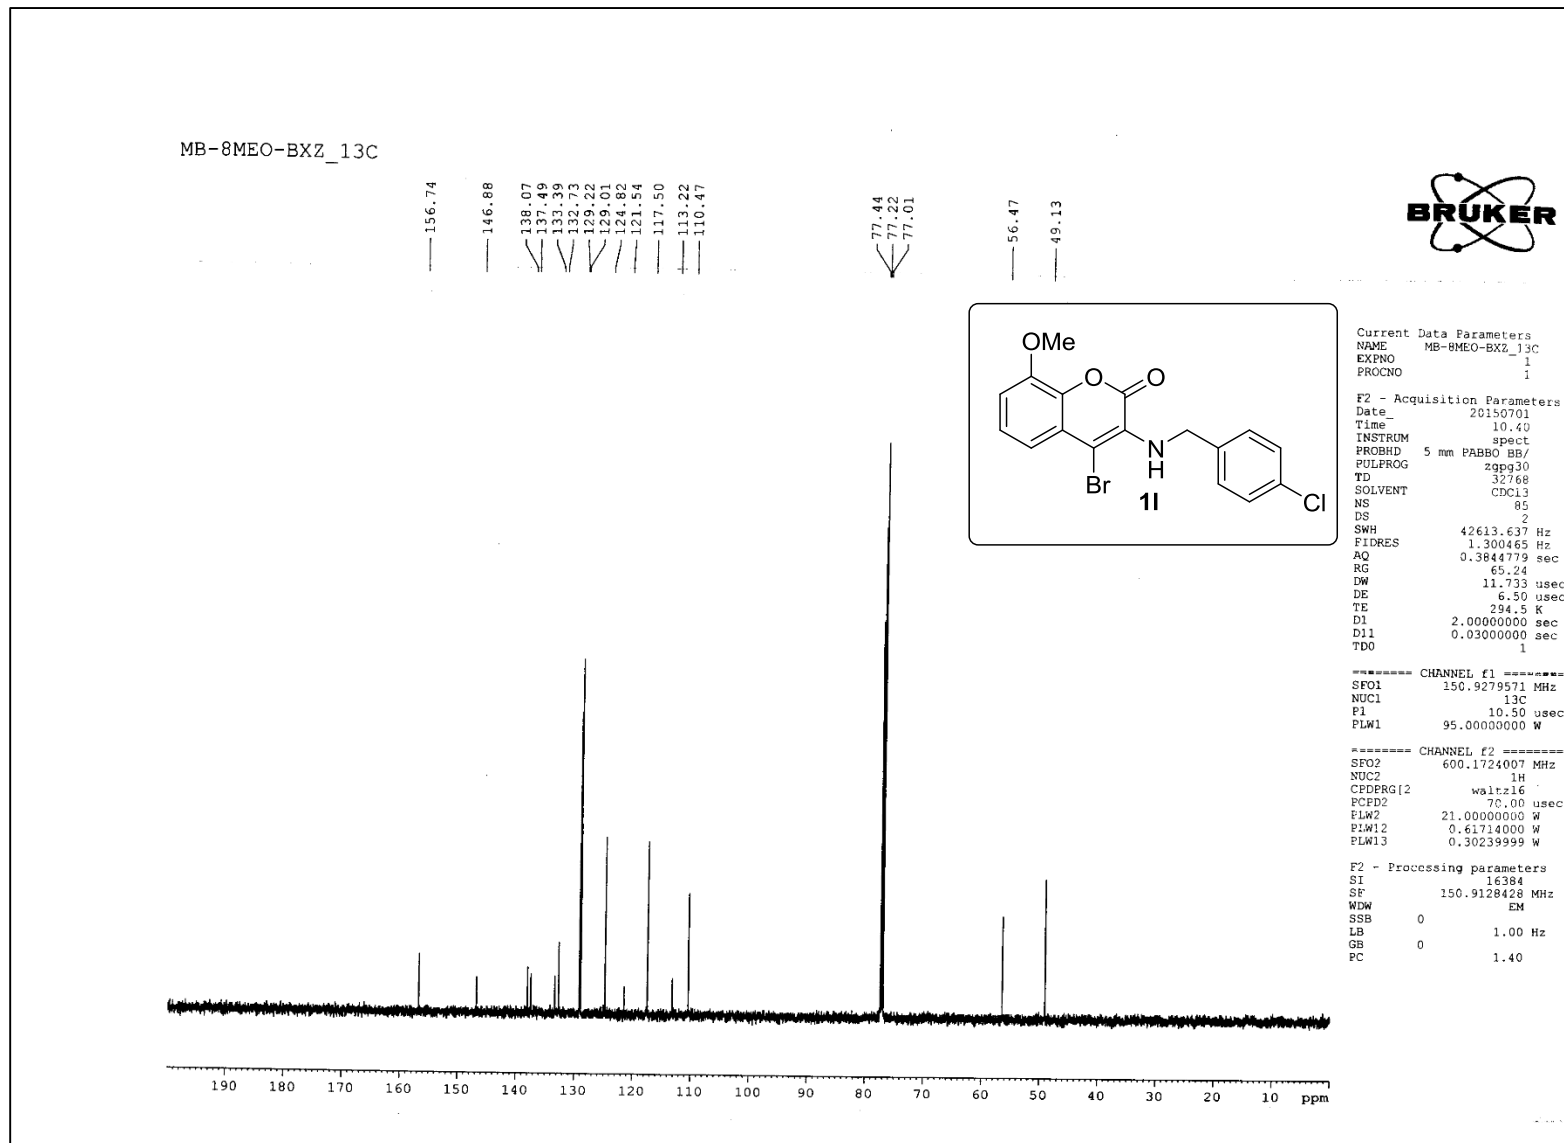

# HRMS spectra of **1l**

|                      |             |                    |        |                        |              |                               |                      |
|----------------------|-------------|--------------------|--------|------------------------|--------------|-------------------------------|----------------------|
| <b>Sample Name</b>   | MB-BNZ-IN   | <b>Position</b>    | Vial 1 | <b>Instrument Name</b> | Instrument 1 | <b>User Name</b>              |                      |
| <b>Inj Vol</b>       | -10         | <b>InjPosition</b> |        | <b>SampleType</b>      | Sample       | <b>IRM Calibration Status</b> | Success              |
| <b>Data Filename</b> | MB-BNZ-IN.d | <b>ACQ Method</b>  |        | <b>Comment</b>         |              | <b>Acquired Time</b>          | 8/13/2015 3:09:52 PM |

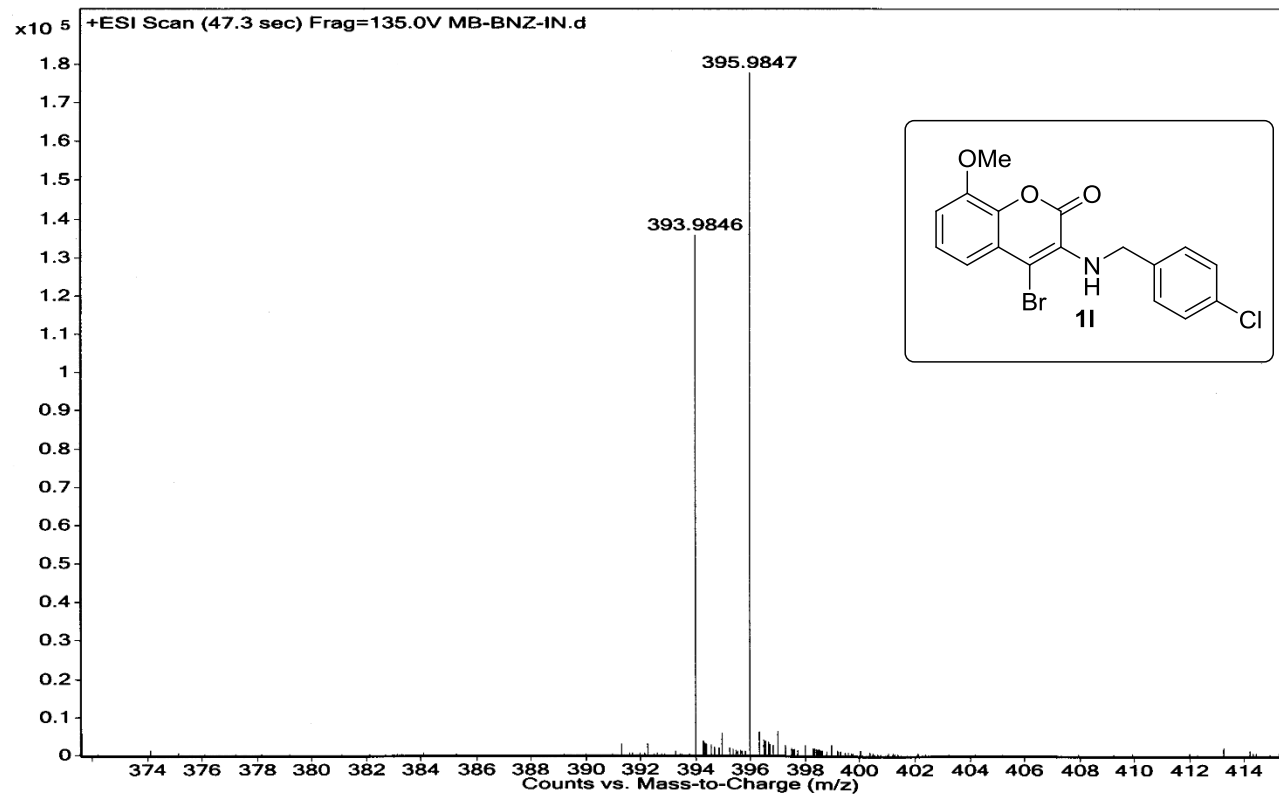

# <sup>1</sup>H NMR spectra of **1m**

MB-Benz-1C-1H

Sample Name:

MB-Benz-1C-1H

Data Collected on:

IITG-NMR-mercury400

Archive directory:

/home/chem/data/study

Sample directory:

DS\_382\_am-01

FidFile: PROTON

Pulse Sequence: PROTON (s2pul)

Solvent: cdcl3

Data collected on: Feb 23 2014

Temp. 25.0 C / 298.1 K

Operator: chem

Relax. delay 1.000 sec

Pulse 45.0 degrees

Acq. time 2.561 sec

Width 6398.0 Hz

32 repetitions

OBSERVE H1, 399.8509634 MHz

DATA PROCESSING

FT size 32768

Total time 2 min 12 sec

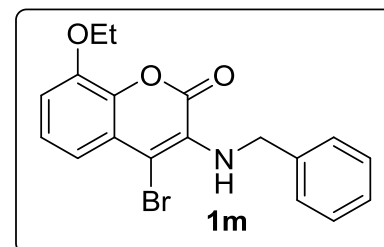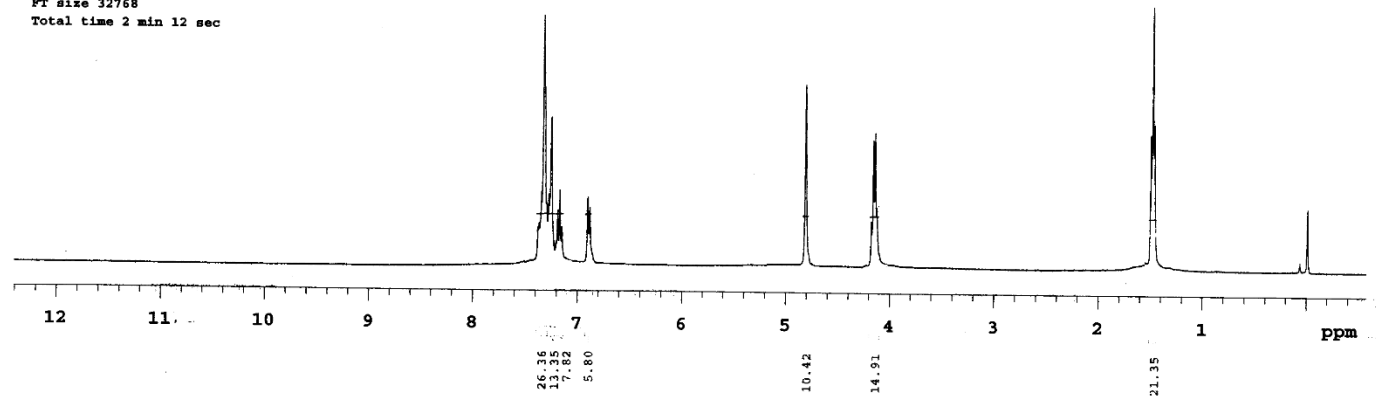

<sup>13</sup>C NMR spectra of **1m**

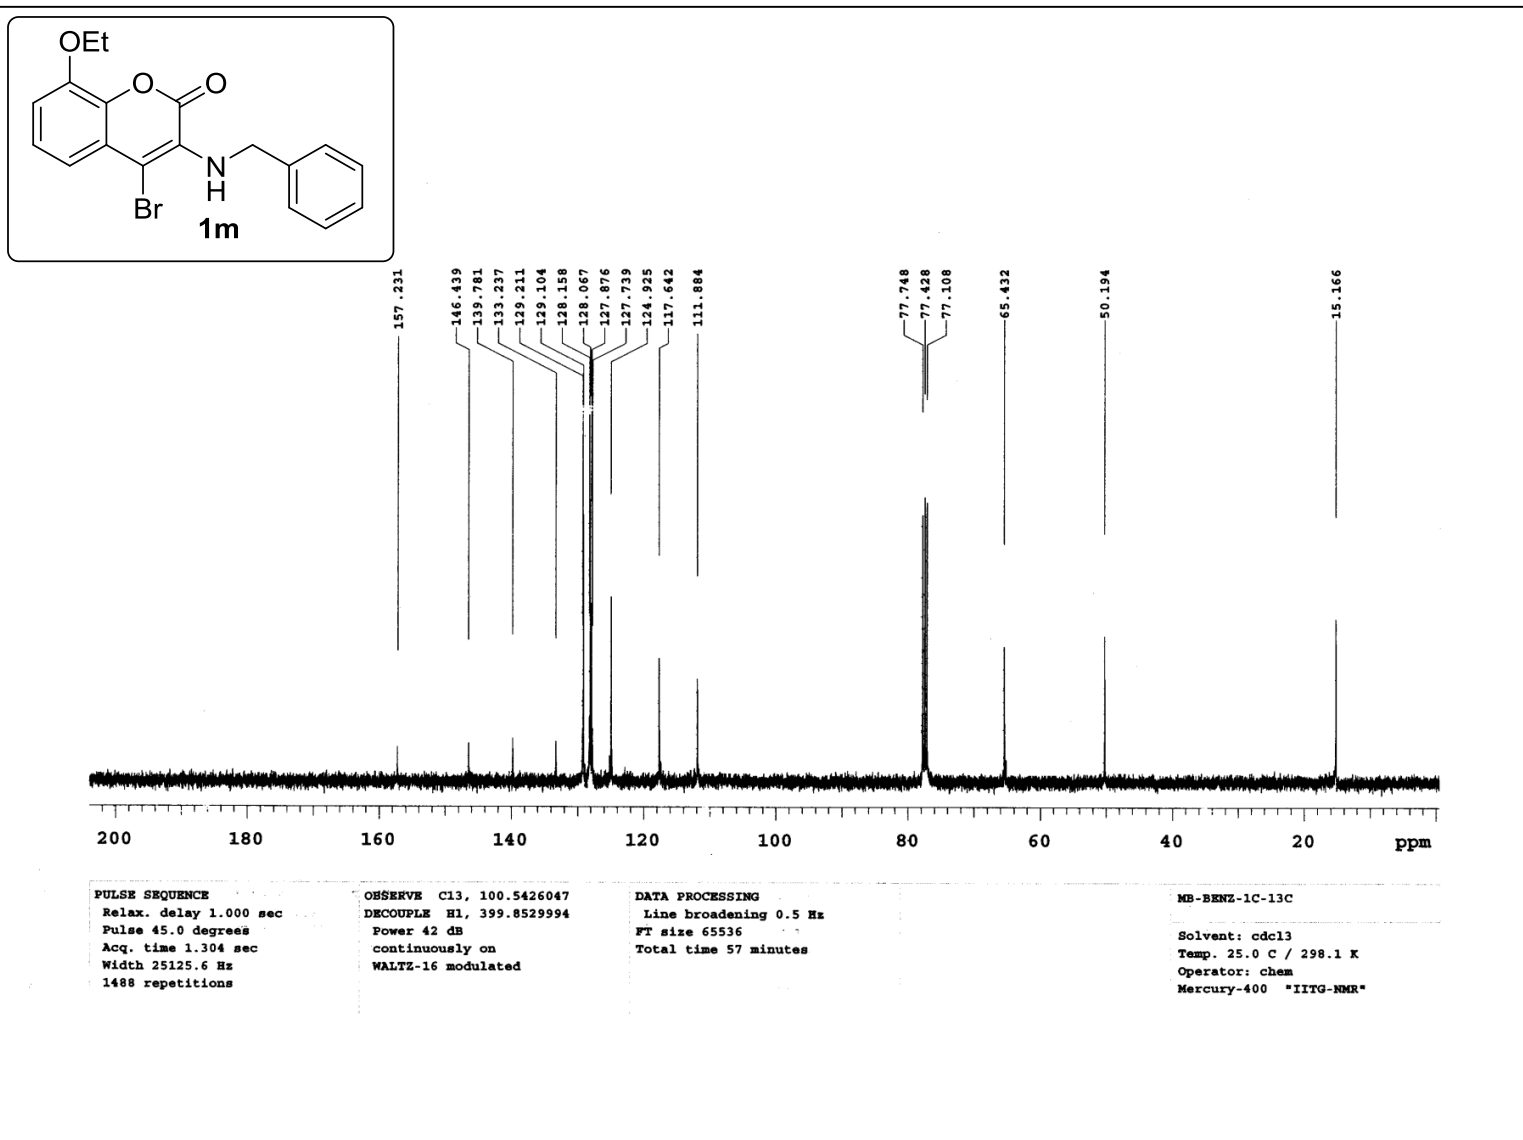

# HRMS spectra of **1m**

| Sample Name   | Position    | Instrument Name | User Name              |
|---------------|-------------|-----------------|------------------------|
| Inj Vol       | InjPosition | SampleType      | IRM Calibration Status |
| Data Filename | ACQ Method  | Comment         | Acquired Time          |

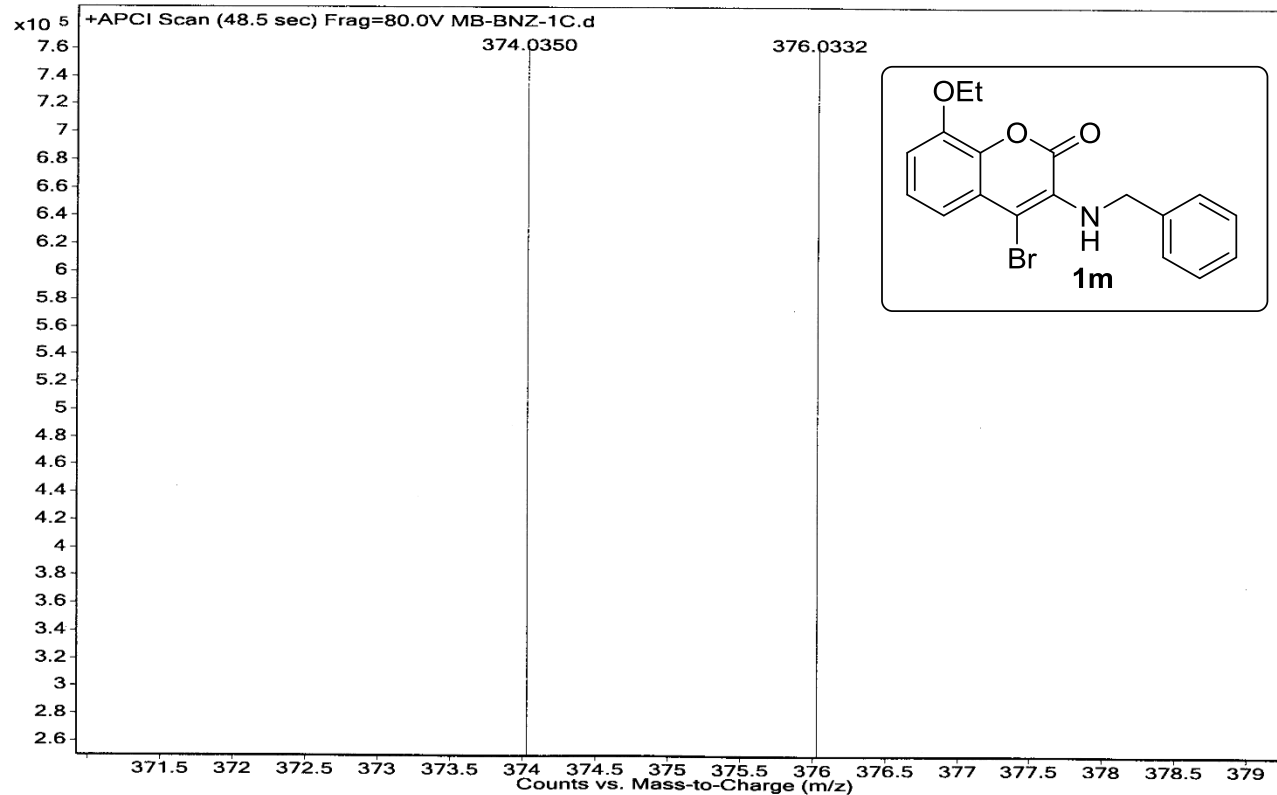

# <sup>1</sup>H NMR spectra of 1n

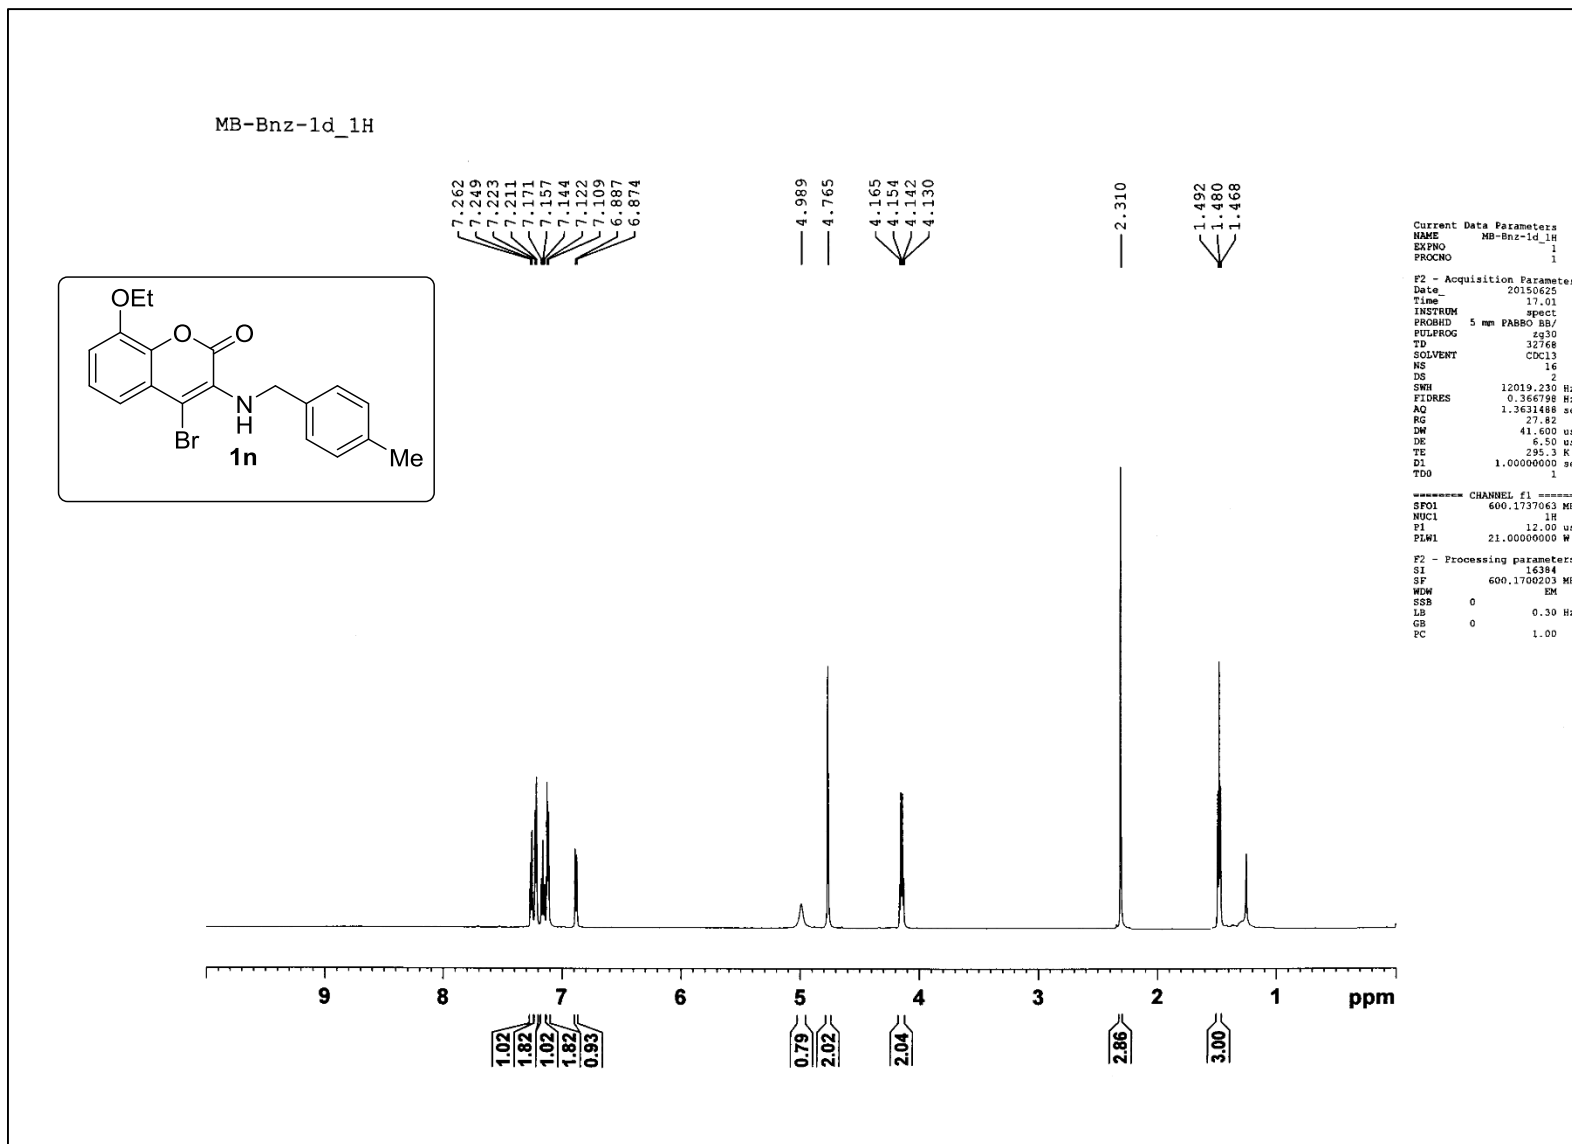

<sup>13</sup>C NMR spectra of **1n**

MB-Bnz-1d\_13C

157.05  
146.21  
137.69  
137.33  
136.52  
133.09  
129.57  
127.86  
124.69  
121.84  
117.40  
112.56  
111.56

77.44  
77.23  
77.02

65.18

49.78

21.29

14.97

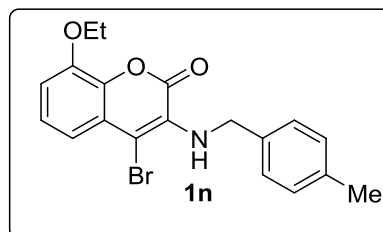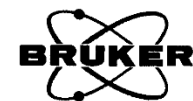

Current Data Parameters  
NAME MB-Bnz-1d\_13C  
EXPNO 1  
PROCNO 1

F2 - Acquisition Parameters  
Date\_ 20150625  
Time 17.05  
INSTRUM spect  
PROBHD 5 mm PABBO BB/  
PULPROG zgpg30  
TD 32768  
SOLVENT CDCl3  
NS 70  
DS 2  
SWH 36057.691 Hz  
FIDRES 1.100393 Hz  
AQ 0.4543829 sec  
RG 65.24  
DW 13.867 usec  
DE 6.50 usec  
TE 296.2 K  
D1 2.0000000 sec  
D11 0.0300000 sec  
TDO 1

===== CHANNEL f1 =====  
SF01 150.9279571 MHz  
NUC1 13C  
P1 10.50 usec  
PLW1 95.00000000 W

===== CHANNEL f2 =====  
SF02 600.1724007 MHz  
NUC2 1H  
CPDPRG12 waltz16  
PCPD2 70.00 usec  
PLW2 21.00000000 W  
PLW12 0.61714000 W  
PLW13 0.30239999 W

F2 - Processing parameters  
SI 16384  
SF 150.9128418 MHz  
WDW EM  
SSB 0  
LB 1.00 Hz  
GB 0  
PC 1.40

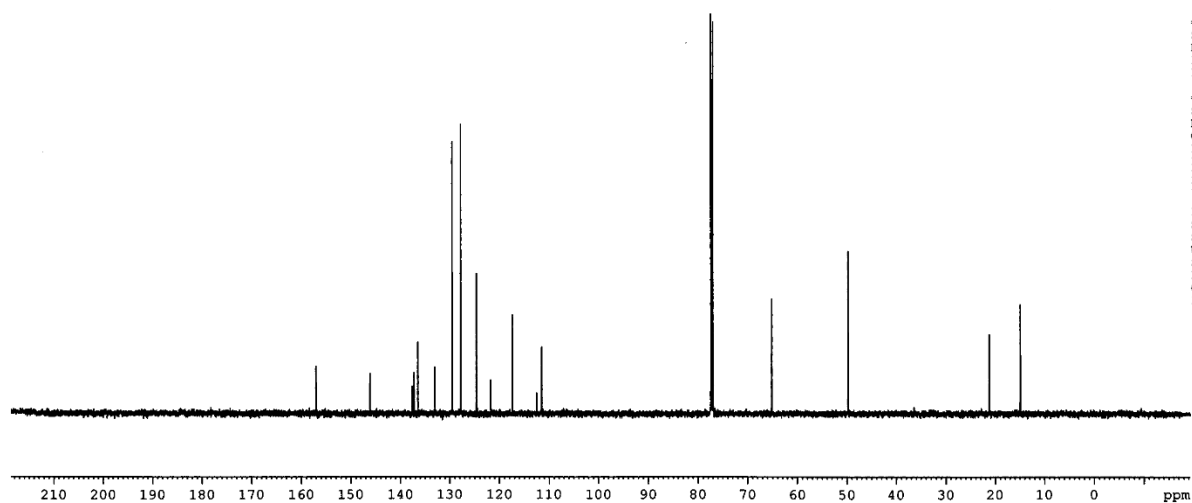

# HRMS spectra of **1n**

Sample Name  
Inj Vol  
Data Filename

Position  
InjPosition  
ACQ Method

Instrument Name  
SampleType  
Comment

User Name  
IRM Calibration Status  
Acquired Time

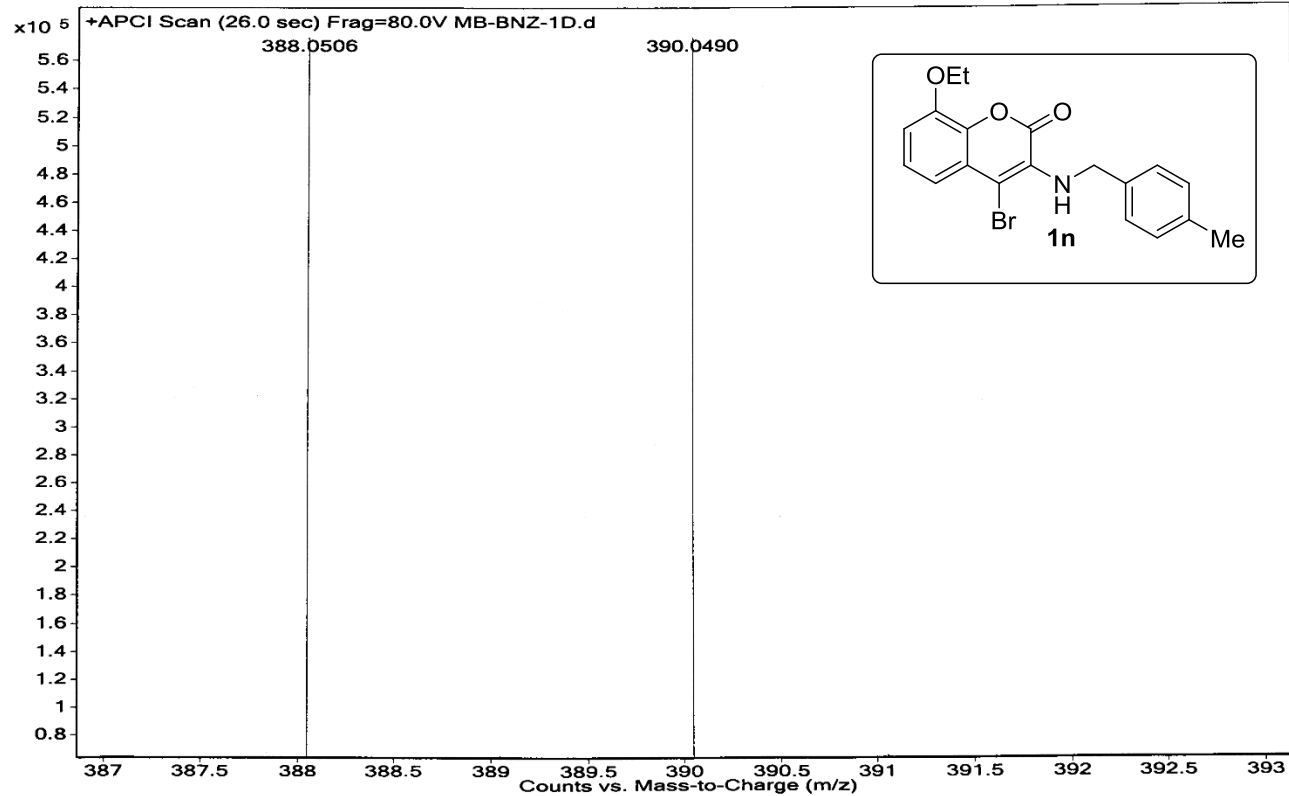



<sup>1</sup>H NMR spectra of **1o**

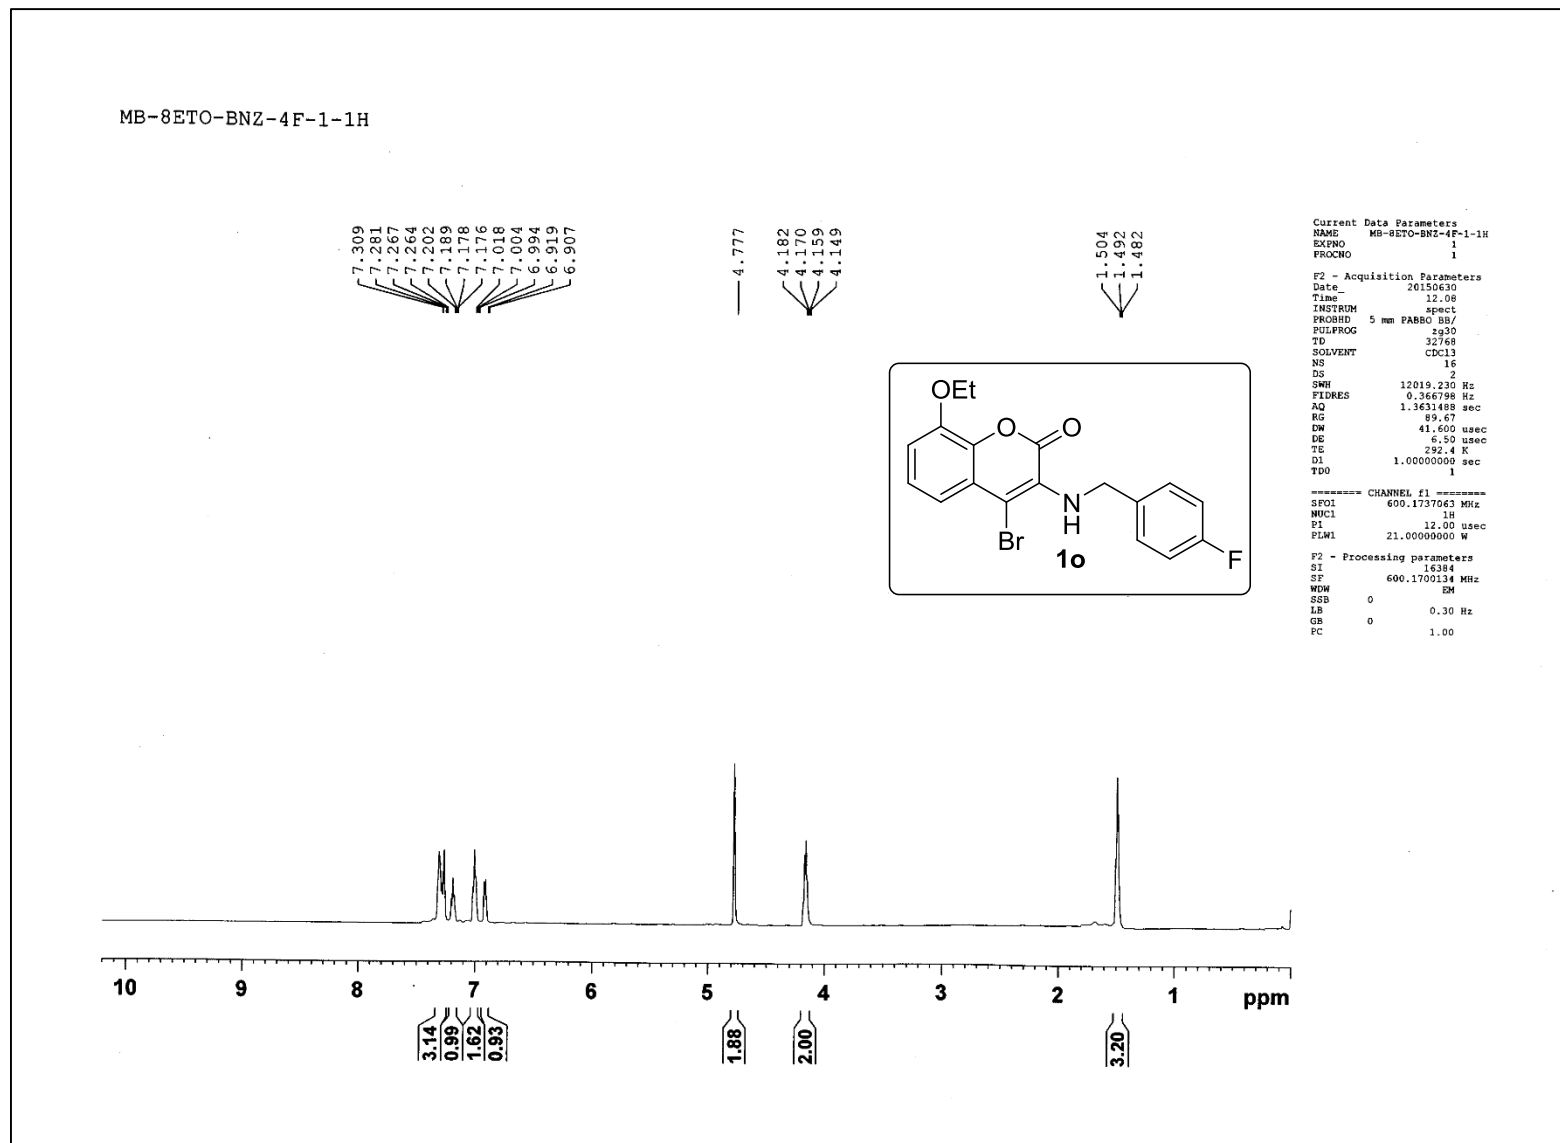

<sup>13</sup>C NMR spectra of **1o**

MB-8EtO-Bnz-4F-13C

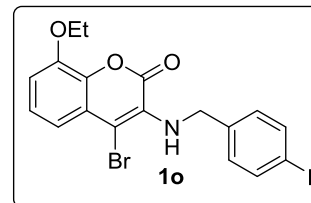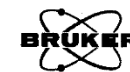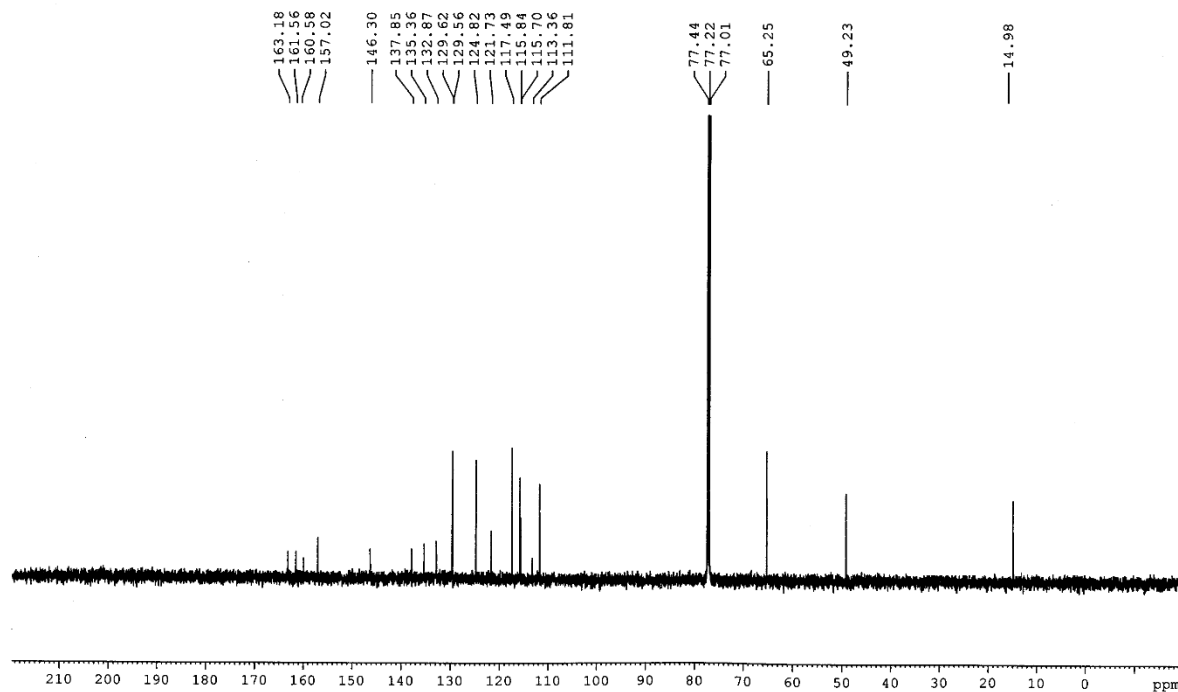

```

Current Data Parameters
NAME      MB-8EtO-Bnz-4F-13C
EXPNO     1
PROCNO    1

F2 - Acquisition Parameters
Date_     20150626
Time      16.36
INSTRUM    spect
PROBHD     5 mm PABBO BB/
PULPROG    zgpg30
TD         32768
SOLVENT    CDCl3
NS         265
DS         2
SWH        36057.693 Hz
FIDRES     1.100393 Hz
AQ         0.4543829 sec
RG         200.18
DW         13.867 usec
DE         6.50 usec
TE         298.4 K
D1         2.00000000 sec
D11        0.03000000 sec
TDO        1

===== CHANNEL f1 =====
SFO1      150.9279571 MHz
NUC1       13C
P1         10.50 usec
PLW1       95.00000000 W

===== CHANNEL f2 =====
SFO2      600.1724007 MHz
NUC2       1H
CPOPRG[2] waltz16
PCPD2      70.00 usec
PLW2       21.00000000 W
PLW12      0.61714000 W
PLW13      0.30239999 W

F2 - Processing parameters
SI         16384
SF         150.9128359 MHz
WDW        EM
SSB        0
GB         0
PC         1.40
    
```

# HRMS spectra Of **1o**

| Sample Name   | Position    | Instrument Name | User Name              |
|---------------|-------------|-----------------|------------------------|
| Inj Vol       | InjPosition | SampleType      | IRM Calibration Status |
| Data Filename | ACQ Method  | Comment         | Acquired Time          |

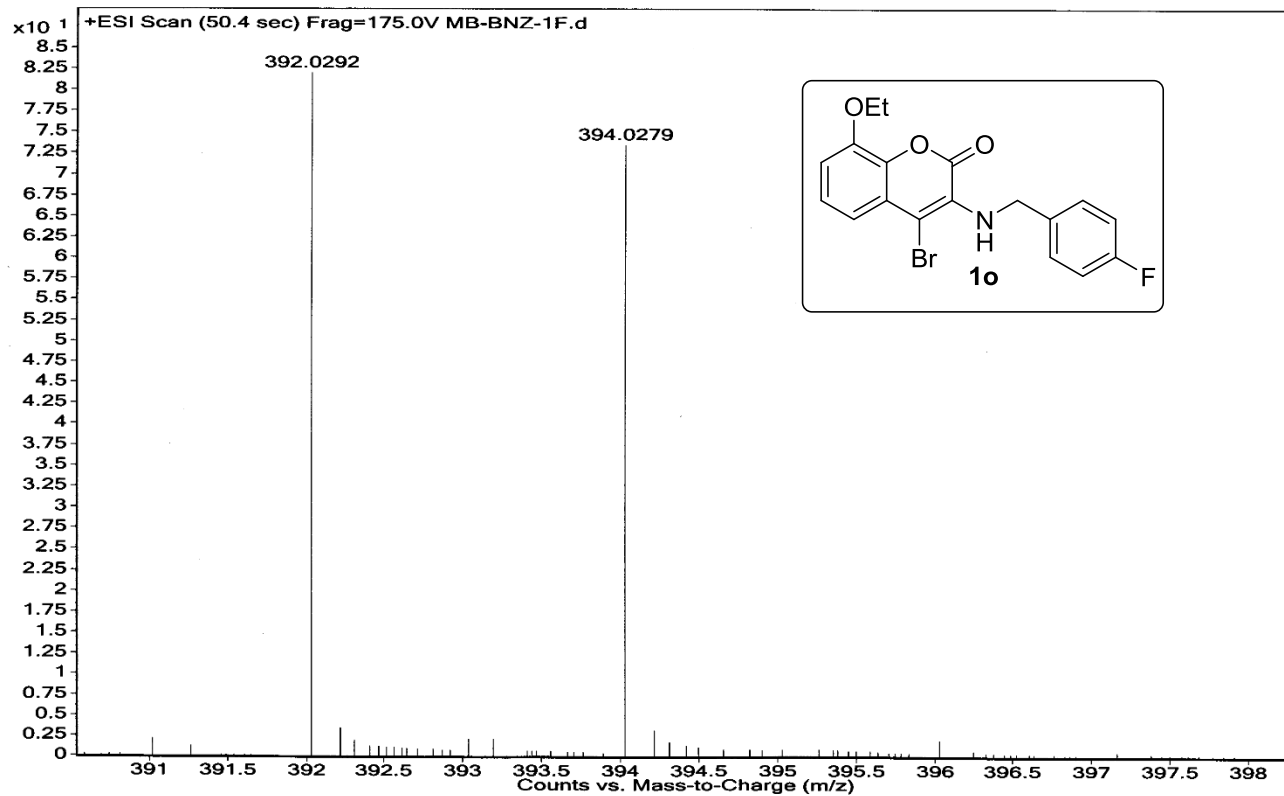

H<sup>1</sup>NMR spectra of **1p**

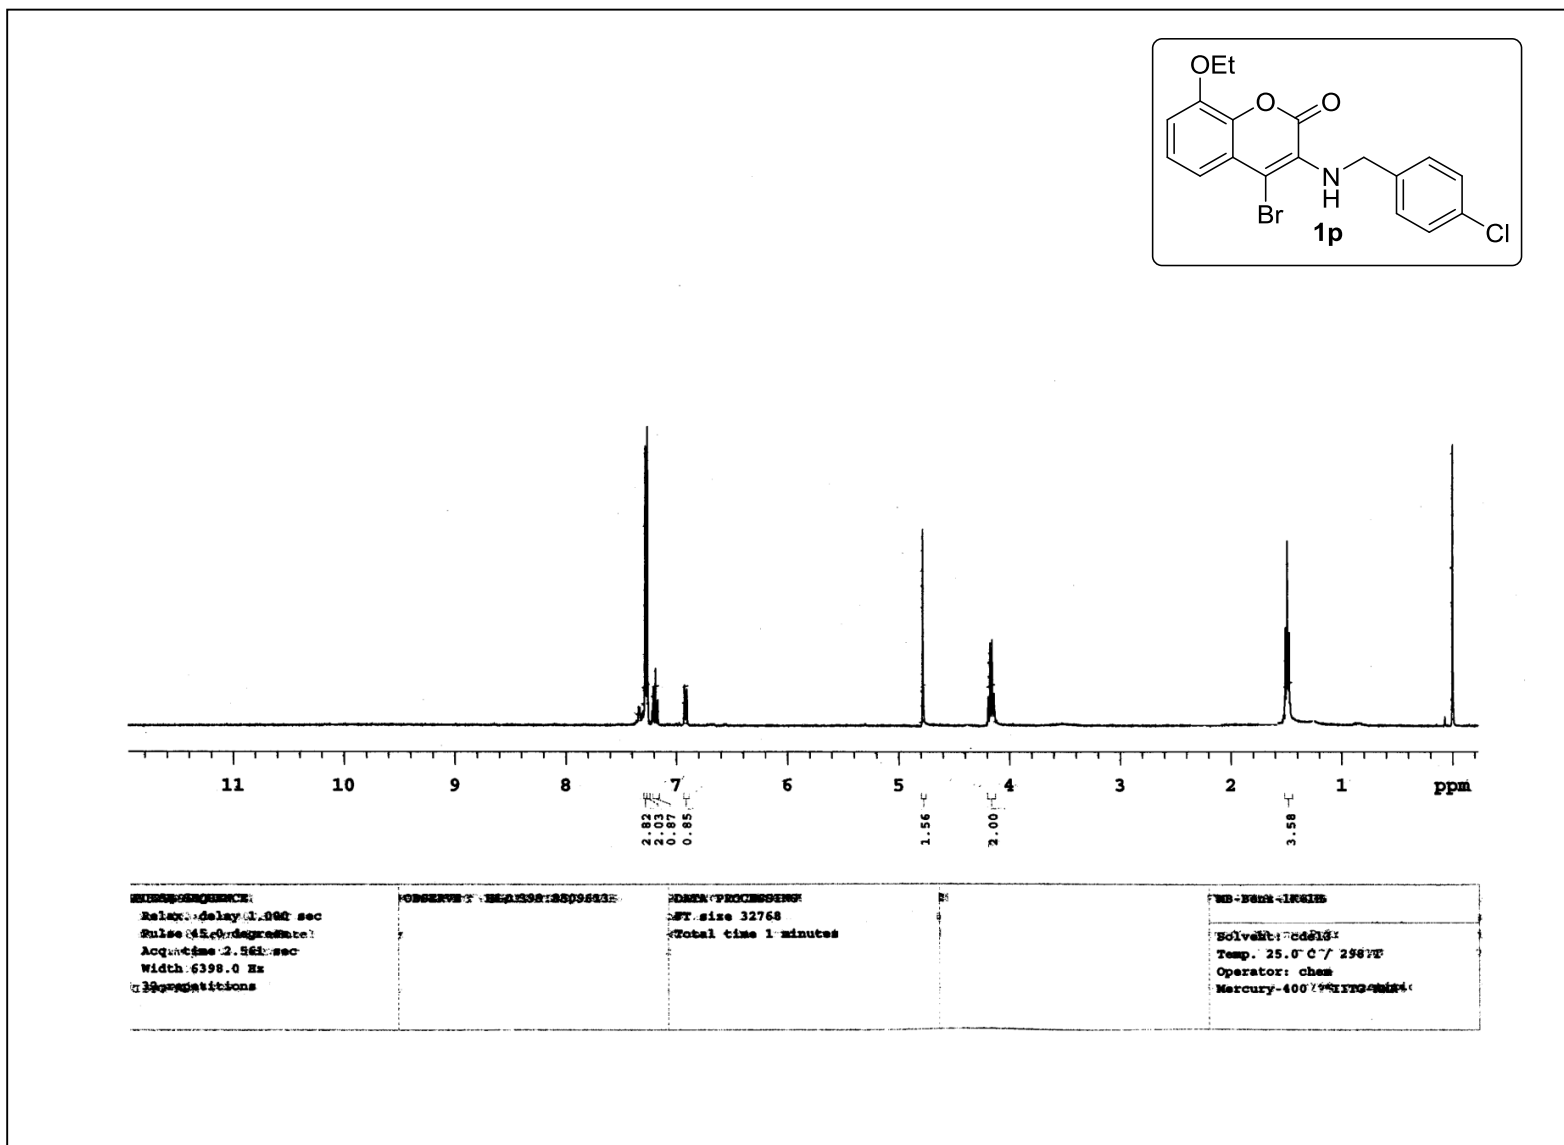

<sup>13</sup>C NMR spectra of **1p**

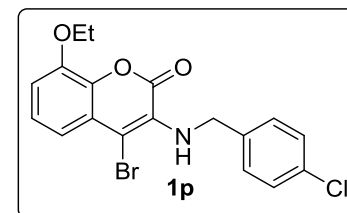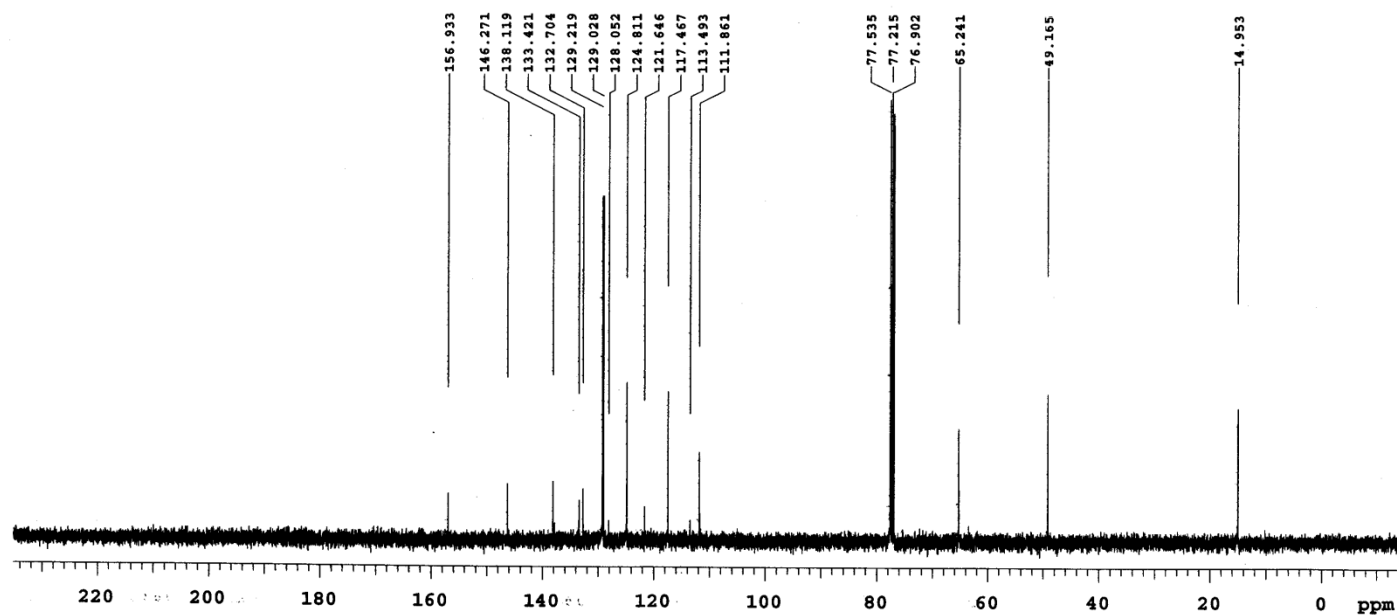

|                                                                                                                                    |                                                                                                                            |                                                                                            |                                                                                                                   |
|------------------------------------------------------------------------------------------------------------------------------------|----------------------------------------------------------------------------------------------------------------------------|--------------------------------------------------------------------------------------------|-------------------------------------------------------------------------------------------------------------------|
| <b>PULSE SEQUENCE</b><br>Relax. delay 1.000 sec<br>Pulse 45.0 degree<br>Acq. time 1.304 sec<br>Width 25125.6 Hz<br>670 repetitions | <b>OBSERVE</b> C13, 100.5425847<br><b>DECOUPLE</b> H1, 399.8529994<br>Power 42 dB<br>continuously on<br>WALTZ-16 modulated | <b>DATA PROCESSING</b><br>Line broadening 0.5 Hz<br>FT size 65536<br>Total time 25 minutes | <b>MS-Benz-1K-13C</b><br><br>Solvent: cdcl3<br>Temp. 25.0 C / 298.1 K<br>Operator: chem<br>Mercury-400 *IITG-NMR* |
|------------------------------------------------------------------------------------------------------------------------------------|----------------------------------------------------------------------------------------------------------------------------|--------------------------------------------------------------------------------------------|-------------------------------------------------------------------------------------------------------------------|

# HRMS spectra of 1p

Sample Name  
Inj Vol  
Data Filename

Position  
InjPosition  
ACQ Method

Instrument Name  
SampleType  
Comment

User Name  
IRM Calibration Status  
Acquired Time

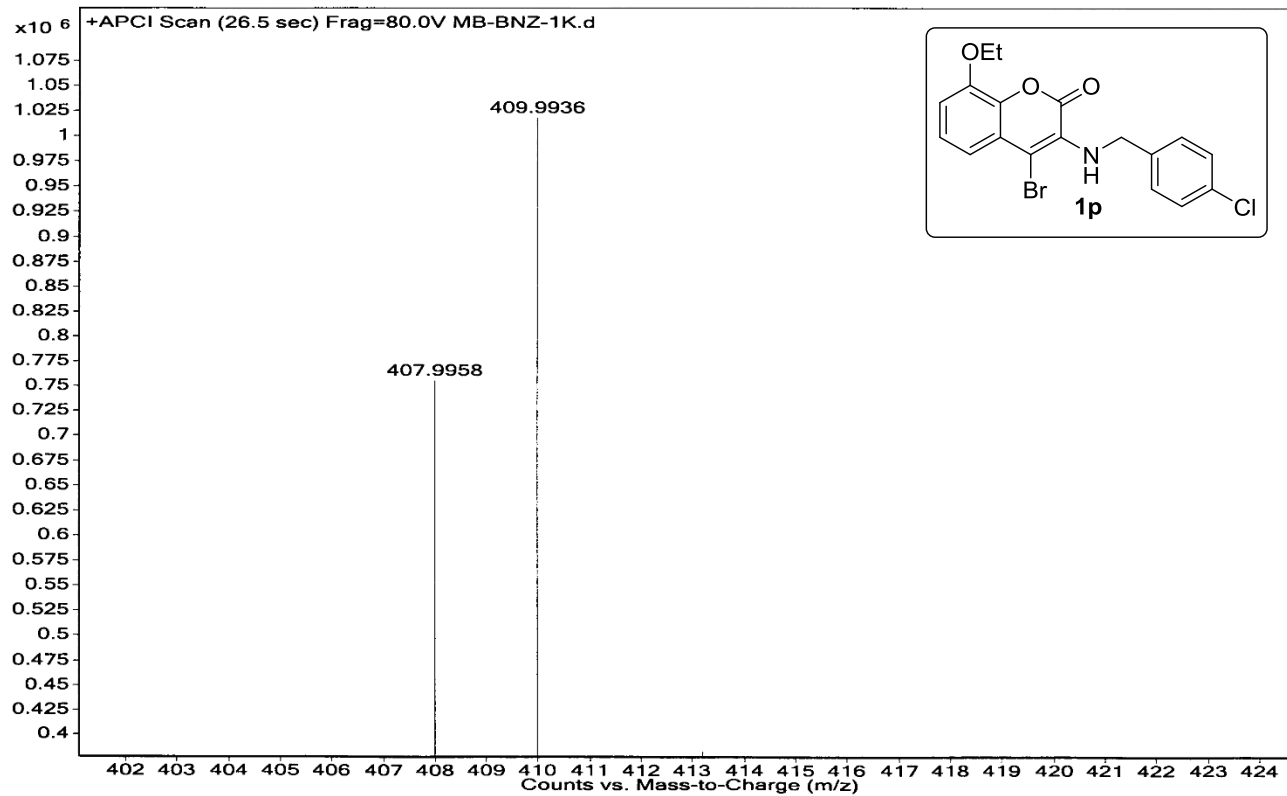

<sup>1</sup>H NMR spectra of **1q**

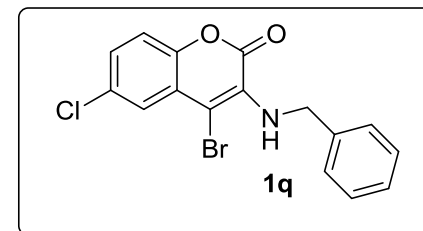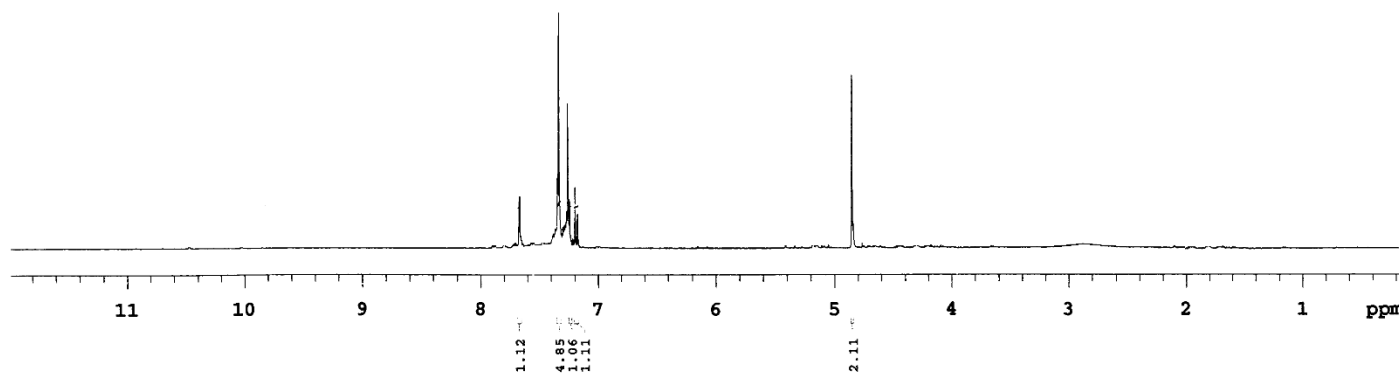

PULSE SEQUENCE  
Relax. delay 1.000 sec  
Pulse 45.0 degrees  
Acq. time 2.561 sec  
Width 6398.0 Hz  
32 repetitions

OBSERVE H1, 399.8509633

DATA PROCESSING  
FT size 32768  
Total time 1 minutes

MB-6-Cl-Bnz-1-1H

Solvent: cdcl3  
Temp. 25.0 C / 298.1 K  
Operator: chem  
File: MB-6-Cl-Bnz-1-1H  
Mercury-400 "IITG-NMR"

<sup>13</sup>C NMR spectra of **1q**

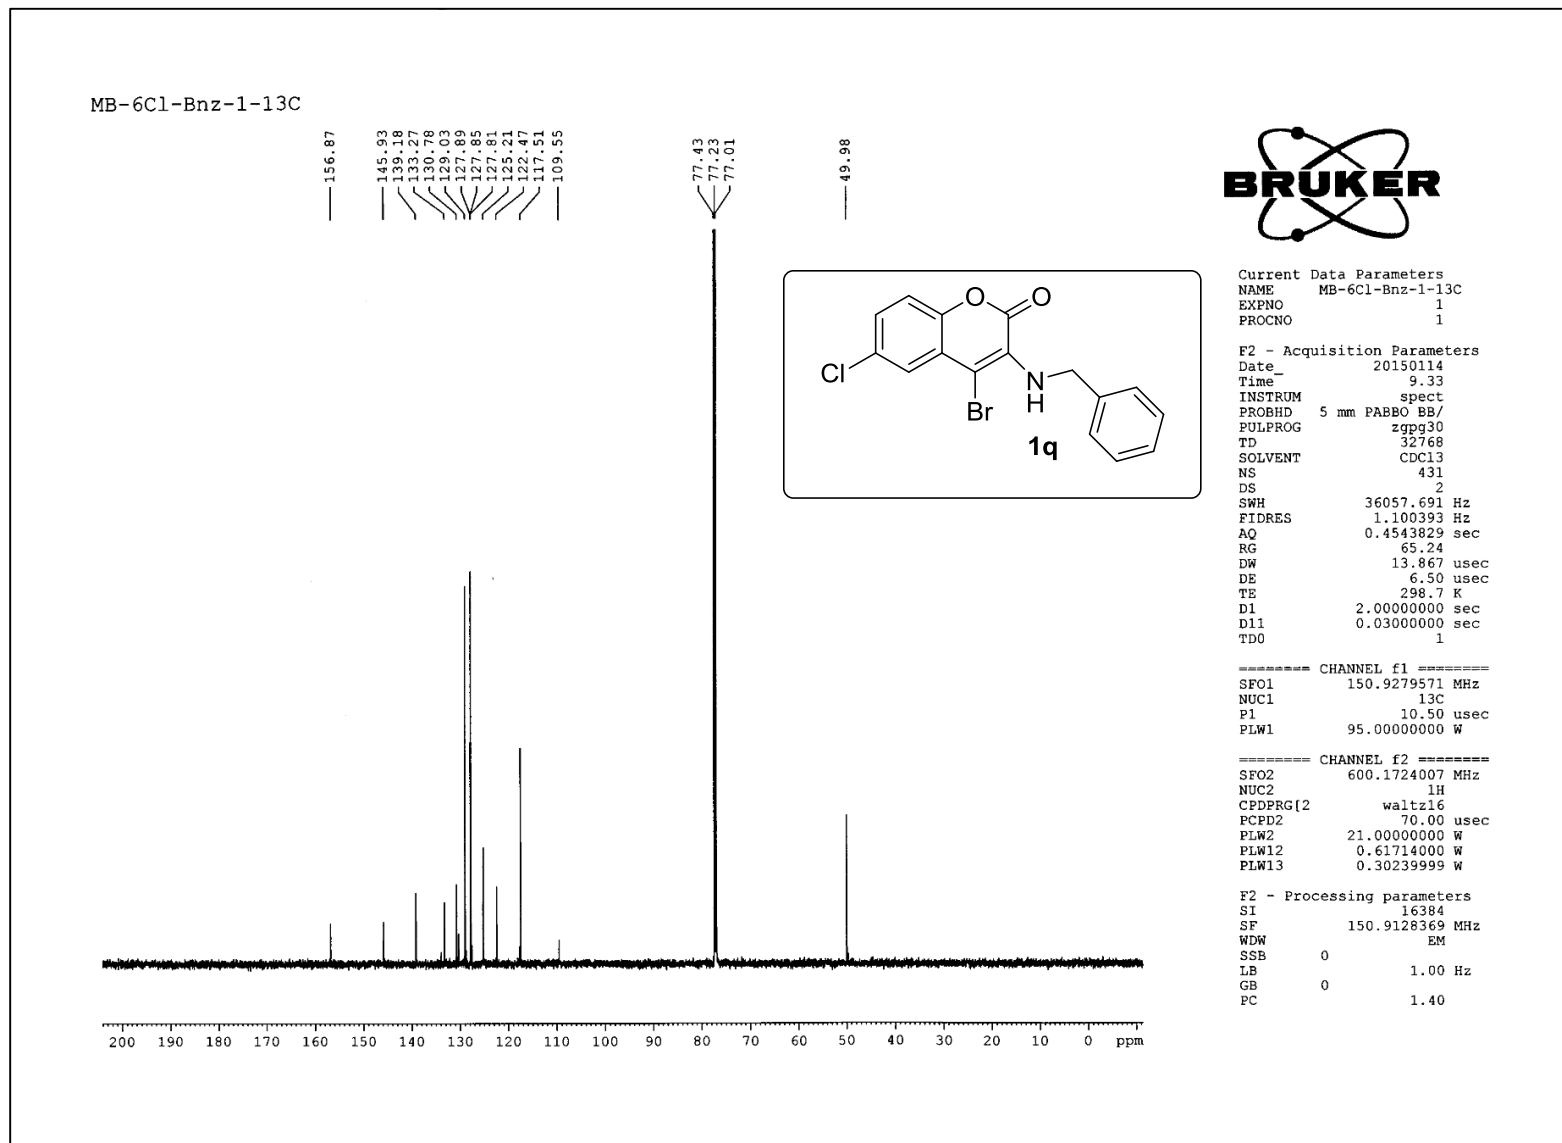



# HRMS spectra of **1q**

|                      |                 |                    |        |                        |              |                               |                      |
|----------------------|-----------------|--------------------|--------|------------------------|--------------|-------------------------------|----------------------|
| <b>Sample Name</b>   | MB-6-Cl-BNZ-1   | <b>Position</b>    | Vial 1 | <b>Instrument Name</b> | Instrument 1 | <b>User Name</b>              |                      |
| <b>Inj Vol</b>       | -10             | <b>InjPosition</b> |        | <b>SampleType</b>      | Sample       | <b>IRM Calibration Status</b> | Success              |
| <b>Data Filename</b> | MB-6-Cl-BNZ-1.d | <b>ACQ Method</b>  |        | <b>Comment</b>         |              | <b>Acquired Time</b>          | 8/13/2015 3:16:31 PM |

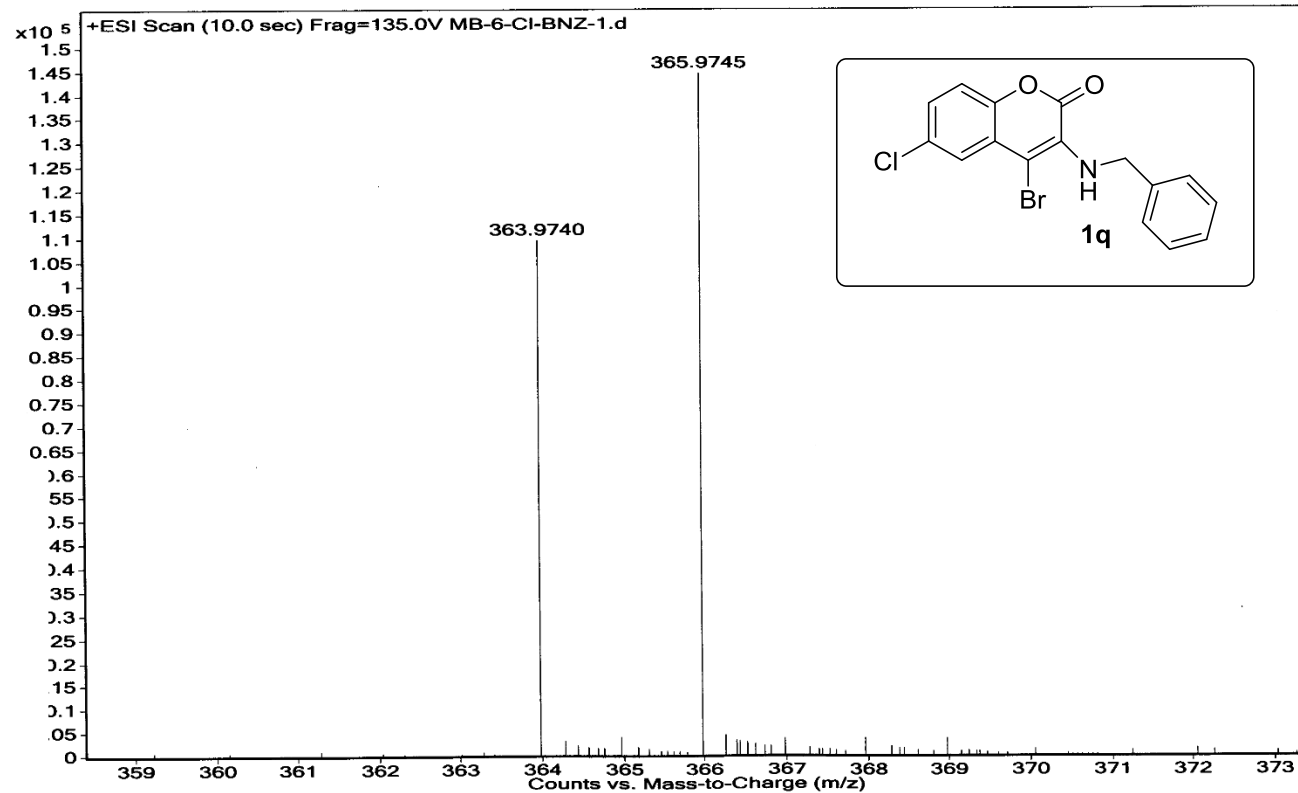

# <sup>1</sup>H NMR Spectra of **1r**

MB-6Br-Bnz-1-14-1H

7.824  
7.820  
7.407  
7.403  
7.393  
7.389  
7.346  
7.341  
7.337  
7.259  
7.136  
7.122

4.857

-U.UU3

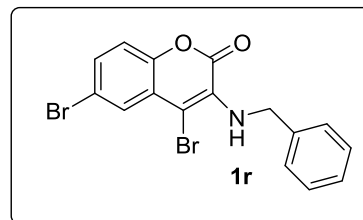

```

Current Data Parameters
NAME      MB-6Br-Bnz-1-14-1H
EXPNO     1
PROCNO    1

F2 - Acquisition Parameters
Date_     20150409
Time      10.34
INSTRUM    spect
PROBHD     5 mm PABBO BB/
PULPROG    zg30
TD         32768
SOLVENT    CDCl3
NS         16
DS         2
SWH        12019.230 Hz
FIDRES     0.366798 Hz
AQ         1.3631488 sec
RG         143.33
DW         41.600 usec
DE         6.50 usec
TE         297.1 K
D1         1.00000000 sec
TD0        1

===== CHANNEL f1 =====
SF01       600.1737063 MHz
NUC1       1H
P1         12.00 usec
PLWL       21.00000000 W

F2 - Processing parameters
SI         16384
SF         600.1700155 MHz
WDW        EM
SSB        0
LB         0.30 Hz
GB         0
PC         1.00
    
```

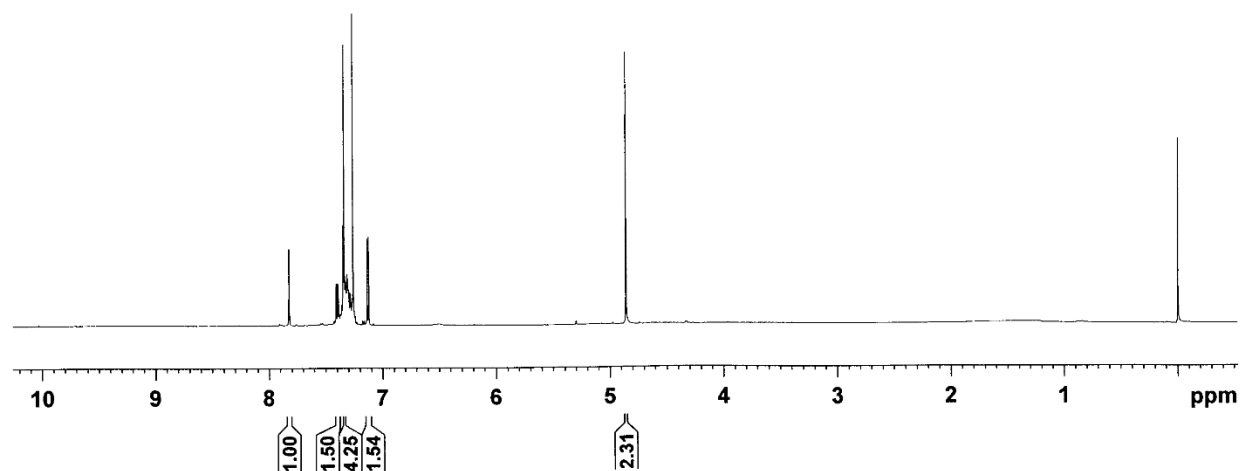

<sup>13</sup>C NMR spectra of **1r**

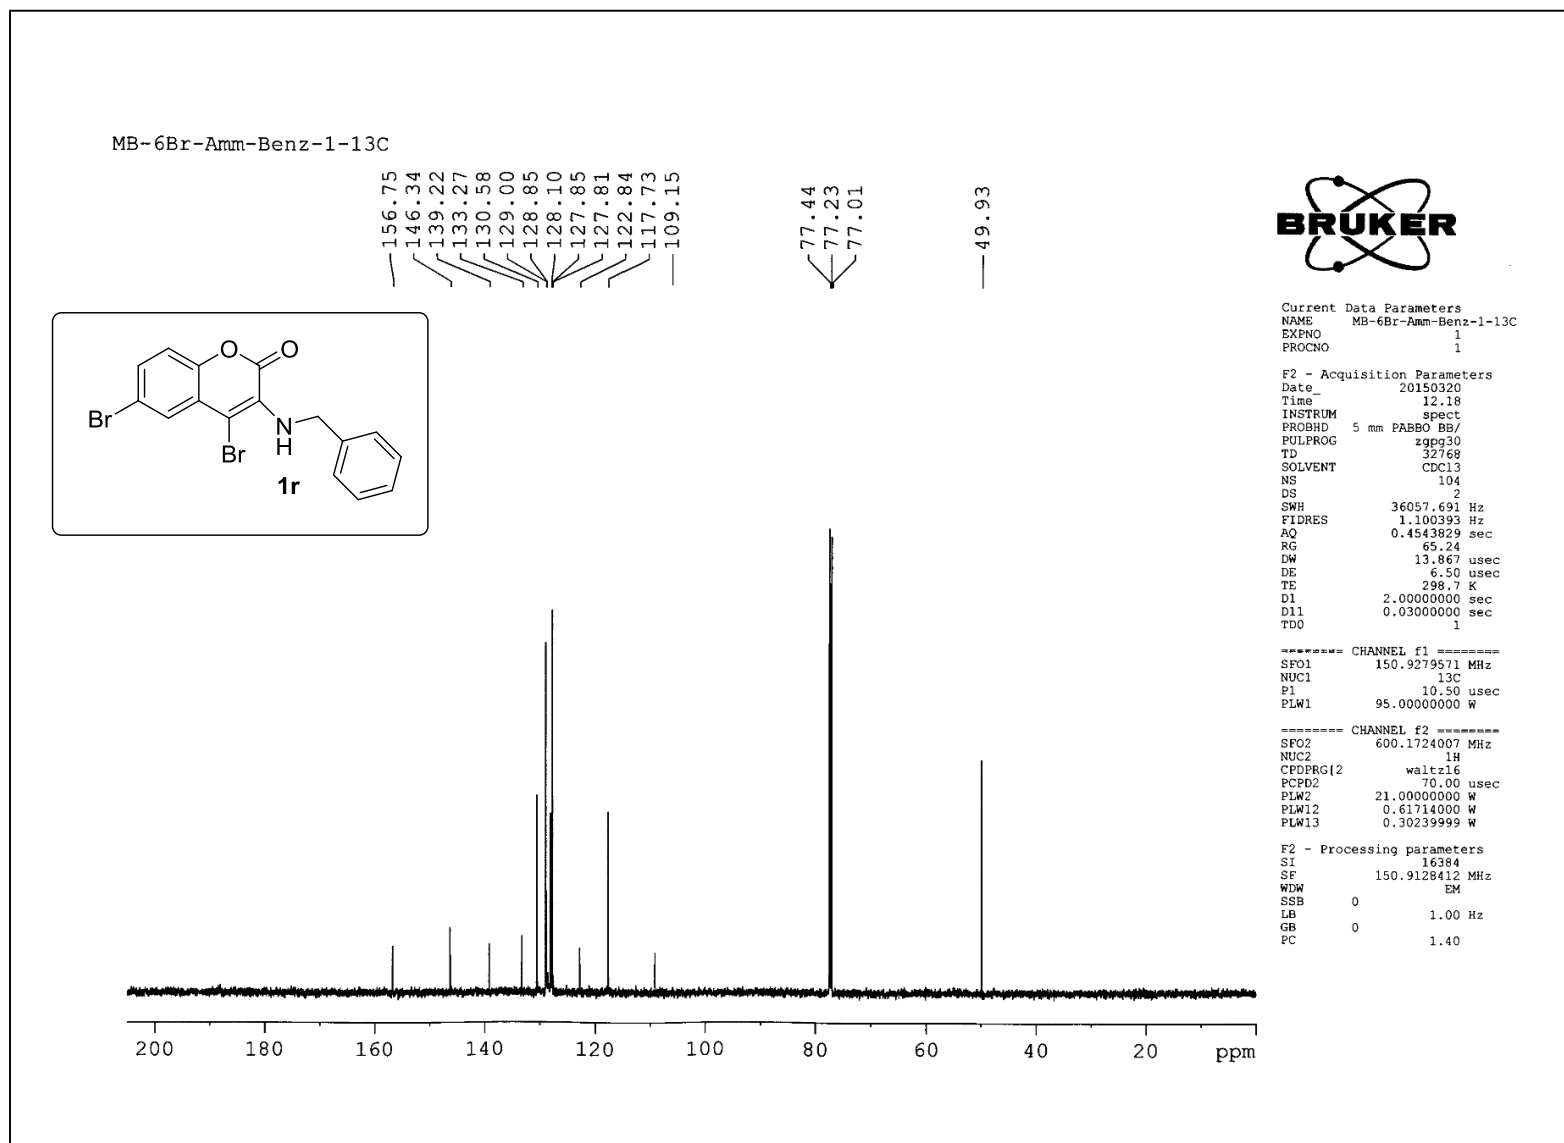

# HRMS spectra of 1r

| Sample Name   | Position    | Instrument Name | User Name              |
|---------------|-------------|-----------------|------------------------|
| Inj Vol       | InjPosition | SampleType      | IRM Calibration Status |
| Data Filename | ACQ Method  | Comment         | Acquired Time          |

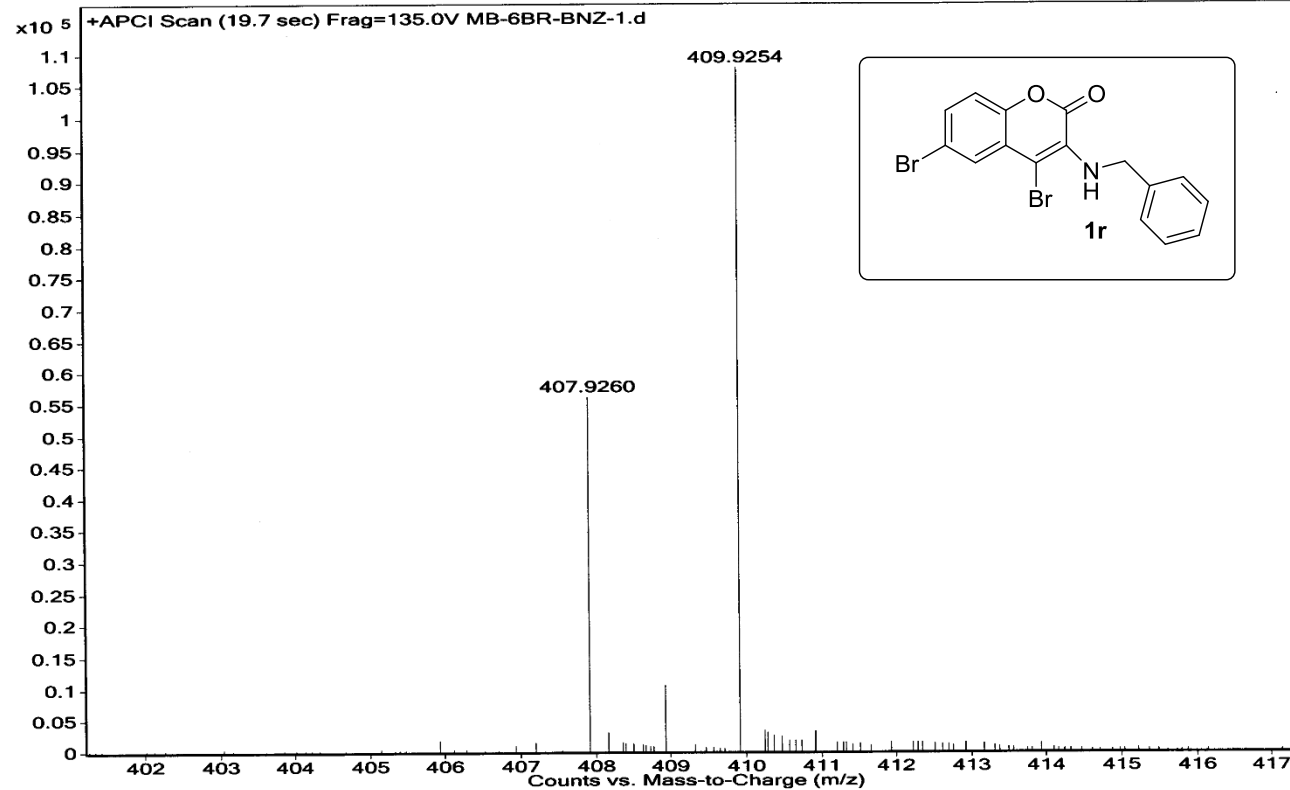

<sup>1</sup>H NMR spectra of **1s**

MB-BNZ-THIO-1-1H

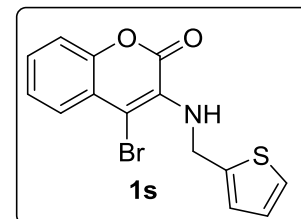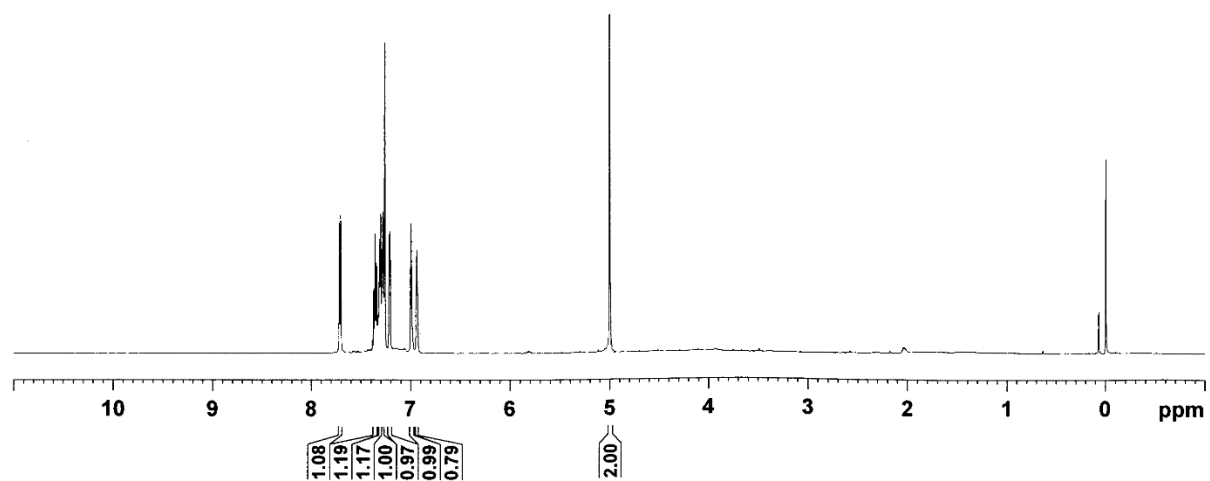

```

Current Data Parameters
NAME      MB-BNZ-Thio-1-1H
EXPNO     1
PROCNO    1

F2 - Acquisition Parameters
Date_     20150819
Time      11.05
INSTRUM    spect
PROBHD     5 mm PABBO BB/
PULPROG    zg30
TD         32768
SOLVENT    CDCl3
NS         16
DS         2
SWH         12019.230 Hz
FIDRES     0.366798 Hz
AQ         1.363488 sec
RG         40.22
DW         41.600 usec
DE         6.50 usec
TE         294.2 K
D1         1.00002000 sec
TDO        1

===== CHANNEL f1 =====
SFO1       600.1737063 MHz
NUC1       1H
P1         12.00 usec
PLM1       21.00000000 W

F2 - Processing parameters
SI         16384
SF         600.1700151 MHz
WDW        EM
SSB        0
LB         0.30 Hz
GB         0
PC         1.00
    
```

<sup>13</sup>C NMR spectra of **1s**

MB\_BNZ\_THIO-1\_13C

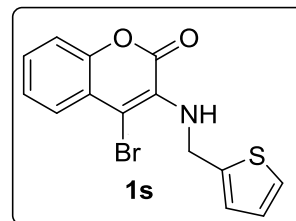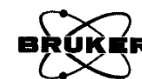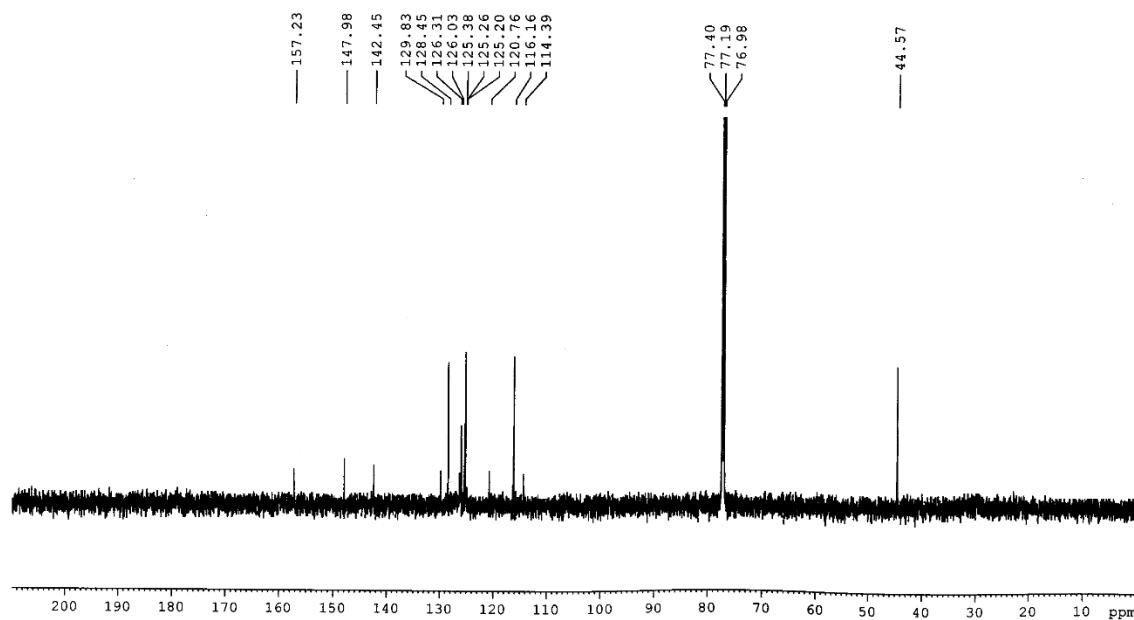

```

Current Data Parameters
NAME      MB_BNZ_THIO-1_13C
EXPNO     1
PROCNO    1

F2 - Acquisition Parameters
Date_     20150820
Time      11.57
INSTRUM    spect
PROBHD     5 mm PABBO BB/
PULPROG    zgpg30
TD         32768
SOLVENT    CDCl3
NS         525
DS         2
SWH         42613.637 Hz
FIDRES     1.300465 Hz
AQ         0.3844775 sec
RG         200.18
DW         11.733 usec
DE         6.50 usec
TE         294.7 K
D1         2.00000000 sec
D11        0.03000000 sec
TDO        1

===== CHANNEL f1 =====
SFO1      150.9279971 MHz
NUC1       13C
P1         10.50 usec
PLW1      95.00000000 W

===== CHANNEL f2 =====
SFO2      600.1724007 MHz
NUC2       1H
CPDPRG2    waltz16
PCPD2      70.00 usec
PLW2      21.00000000 W
PLW12     0.61714000 W
PLW13     0.30239999 W

F2 - Processing parameters
SI         16384
SF         150.9128416 MHz
WDW        EM
SSB        0
LB         1.00 Hz
GB         0
PC         1.40
    
```

# HRMS spectra of 1s

|                      |                 |                    |        |                        |              |                               |                       |
|----------------------|-----------------|--------------------|--------|------------------------|--------------|-------------------------------|-----------------------|
| <b>Sample Name</b>   | MB-BNZ-THIO-1   | <b>Position</b>    | Vial 1 | <b>Instrument Name</b> | Instrument 1 | <b>User Name</b>              |                       |
| <b>Inj Vol</b>       | -10             | <b>InjPosition</b> |        | <b>SampleType</b>      | Sample       | <b>IRM Calibration Status</b> | Success               |
| <b>Data Filename</b> | MB-BNZ-THIO-1.d | <b>ACQ Method</b>  |        | <b>Comment</b>         |              | <b>Acquired Time</b>          | 8/14/2015 11:36:00 AM |

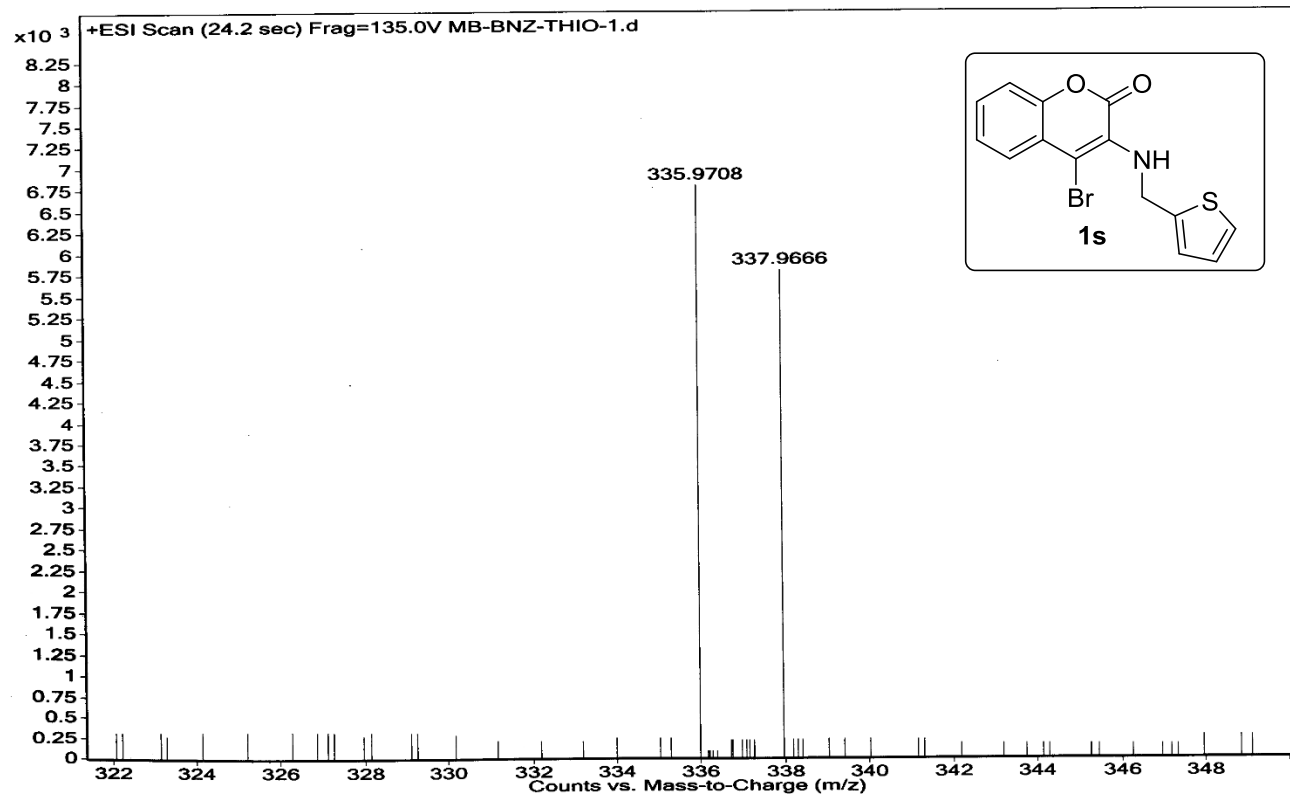

# <sup>1</sup>H NMR spectra of **1t**

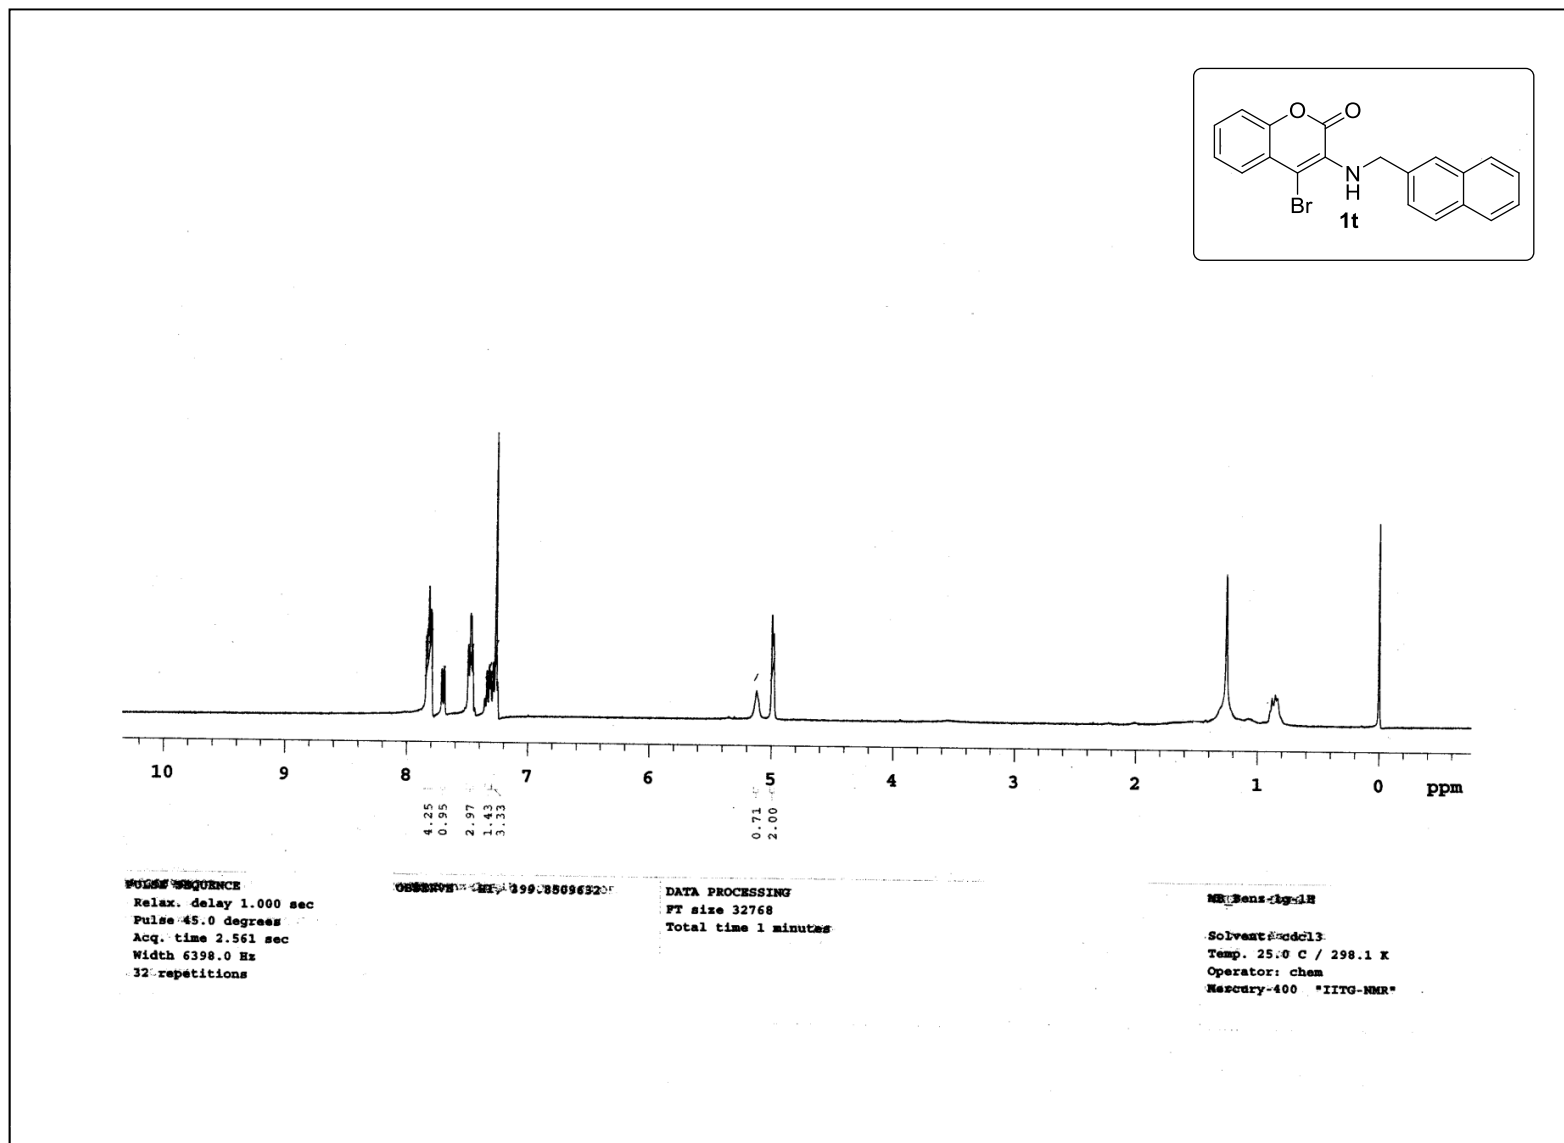



<sup>13</sup>C NMR spectra of **1t**

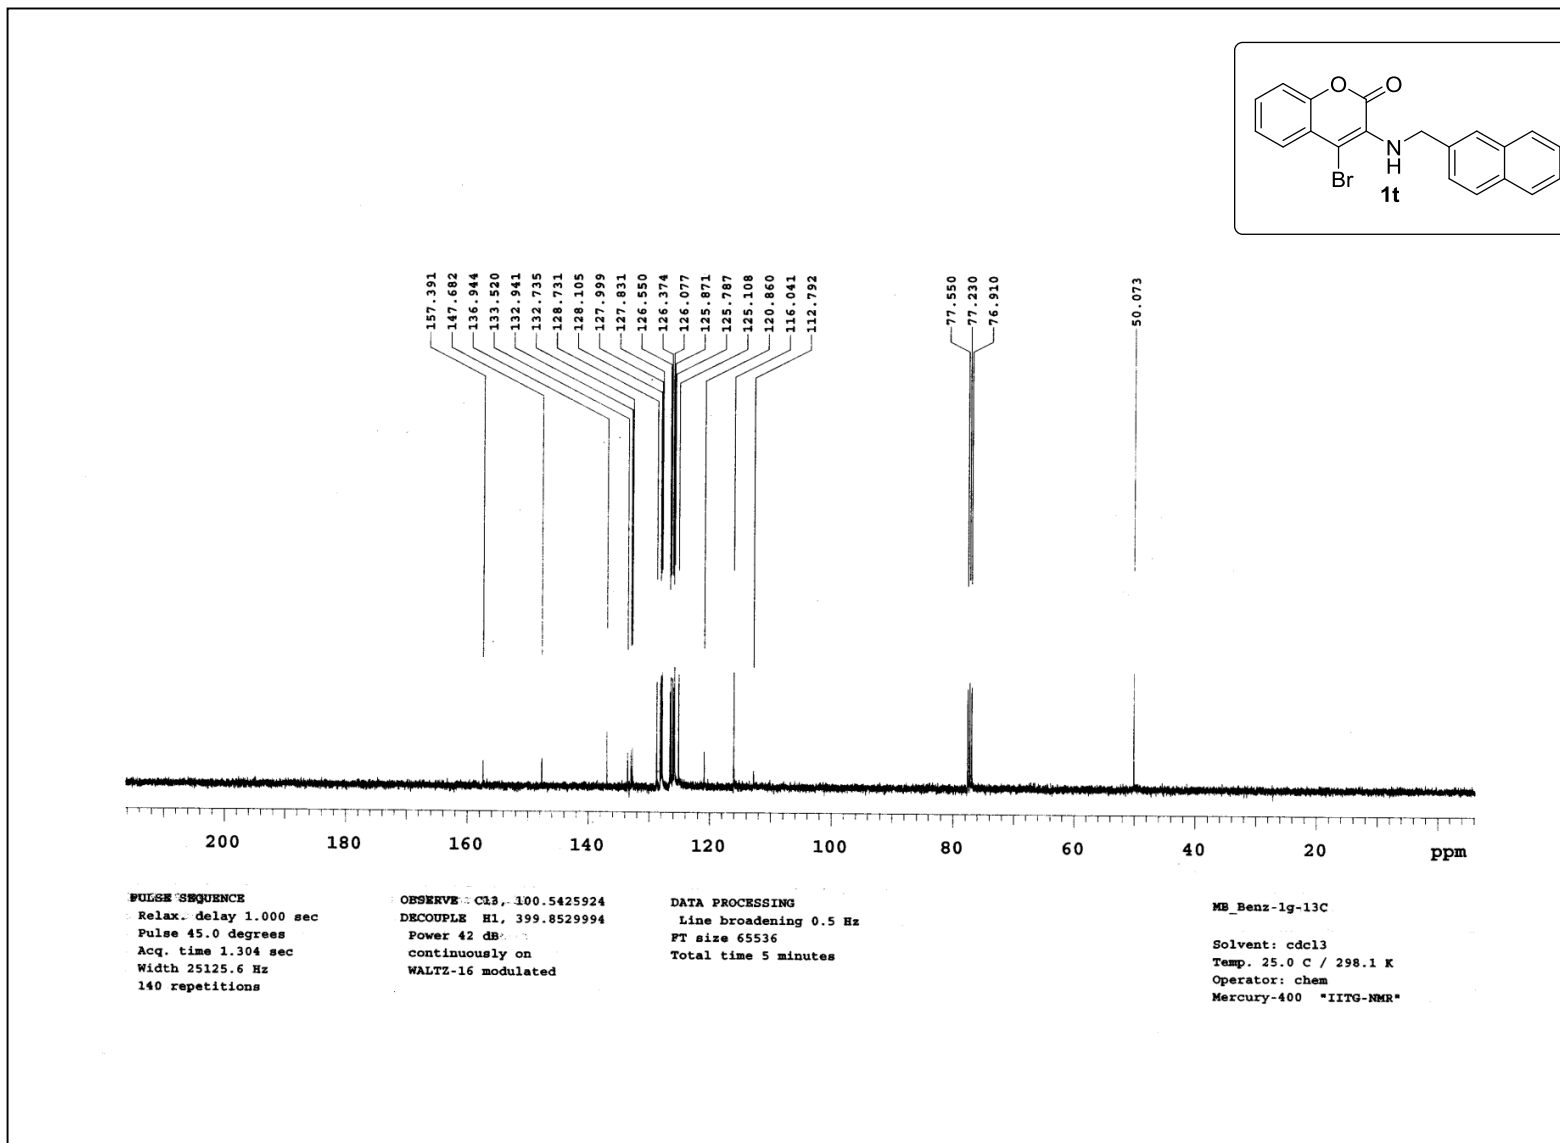

# HRMS spectra of 1t

|                      |             |                    |        |                        |              |                               |                      |
|----------------------|-------------|--------------------|--------|------------------------|--------------|-------------------------------|----------------------|
| <b>Sample Name</b>   | MB-BNZ-1G   | <b>Position</b>    | Vial 1 | <b>Instrument Name</b> | Instrument 1 | <b>User Name</b>              |                      |
| <b>Inj Vol</b>       | -10         | <b>InjPosition</b> |        | <b>SampleType</b>      | Sample       | <b>IRM Calibration Status</b> | Success              |
| <b>Data Filename</b> | MB-BNZ-1G.d | <b>ACQ Method</b>  |        | <b>Comment</b>         |              | <b>Acquired Time</b>          | 8/13/2015 3:11:54 PM |

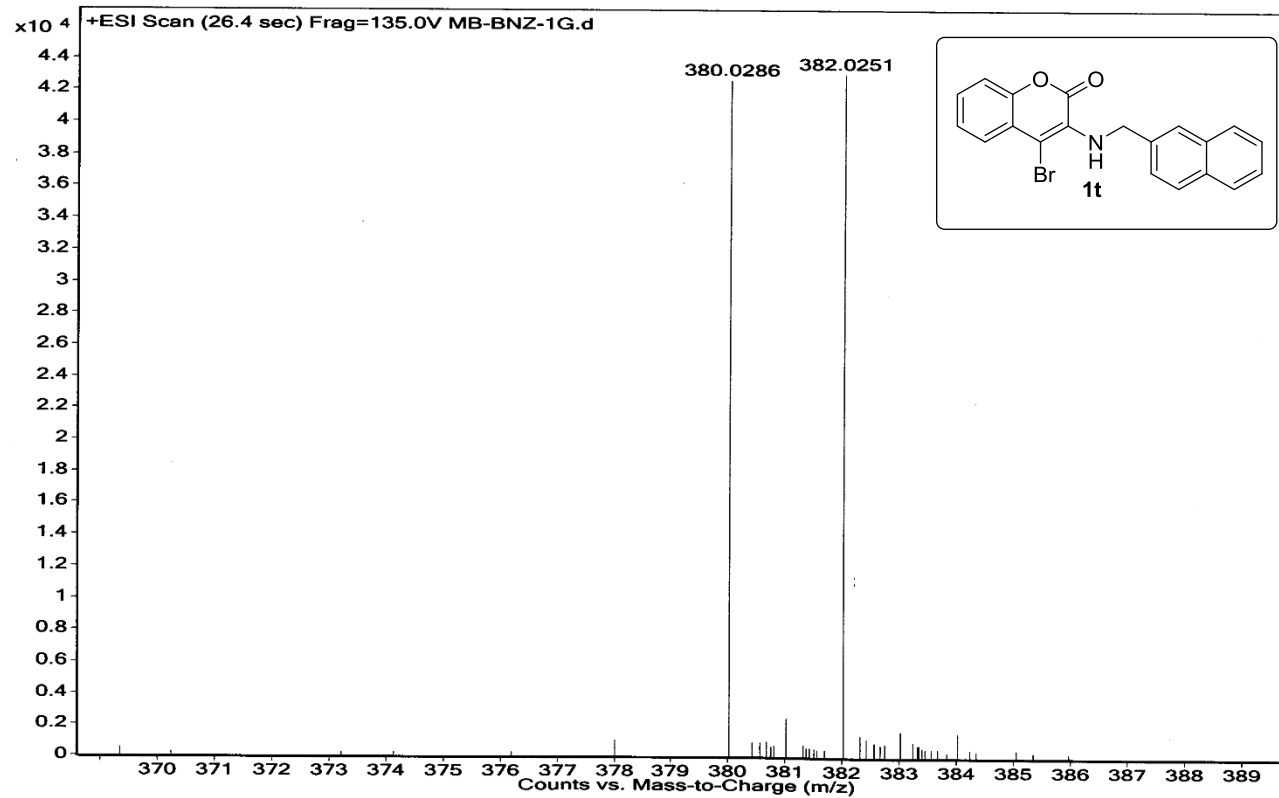

H<sup>1</sup> NMR spectra of **1u**

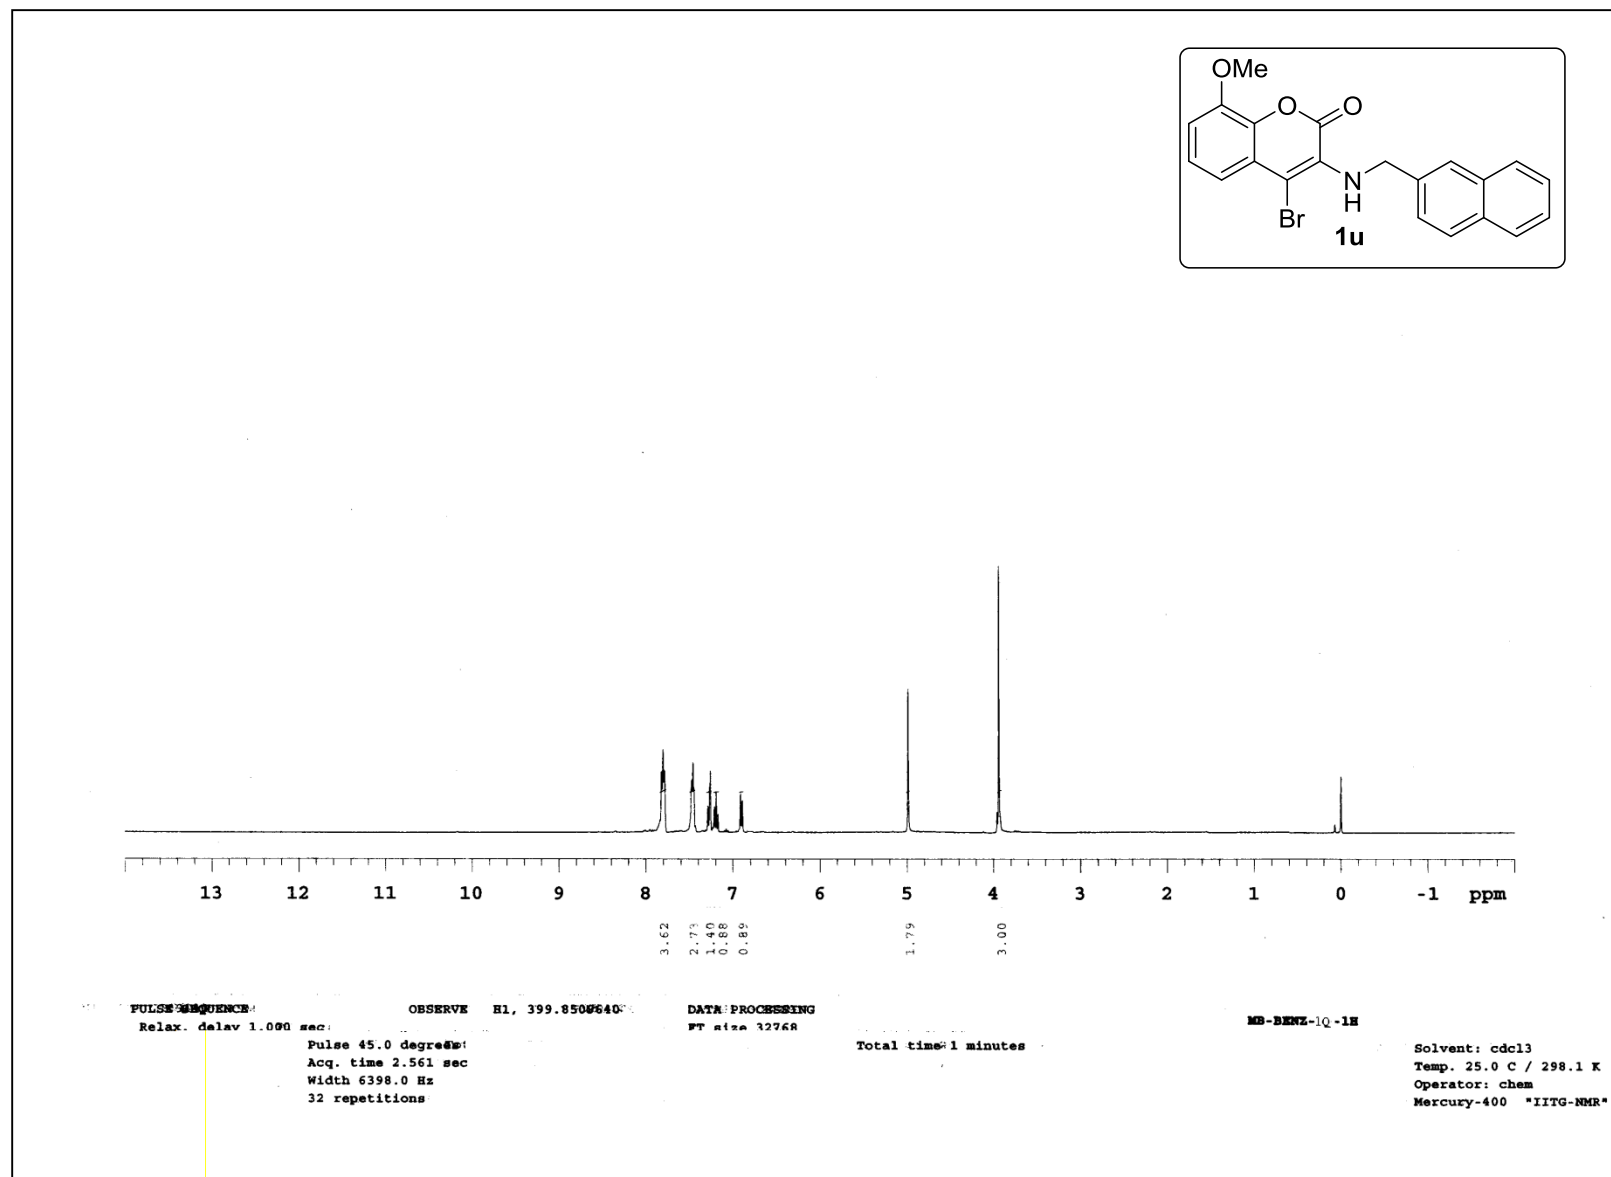

<sup>13</sup>C NMR spectra of **1u**

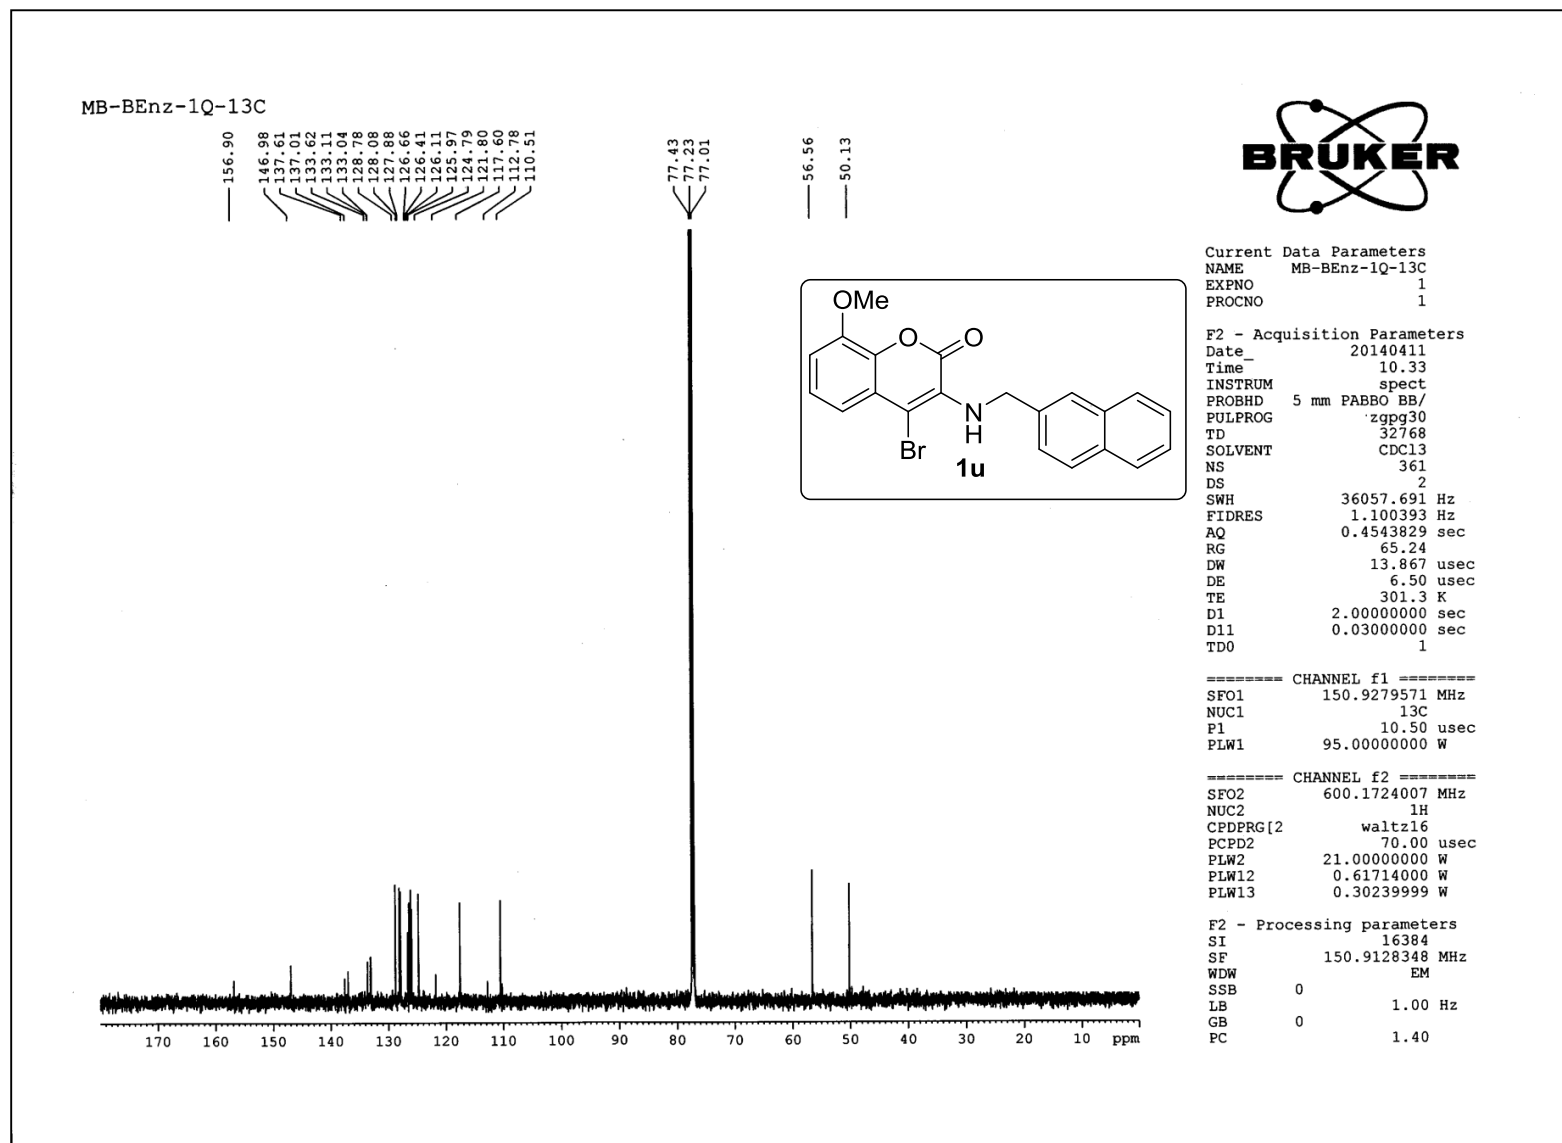

# HRMS spectra of **1u**

Sample Name  
Inj Vol  
Data Filename

Position  
InjPosition  
ACQ Method

Instrument Name  
SampleType  
Comment

User Name  
IRM Calibration Status  
Acquired Time

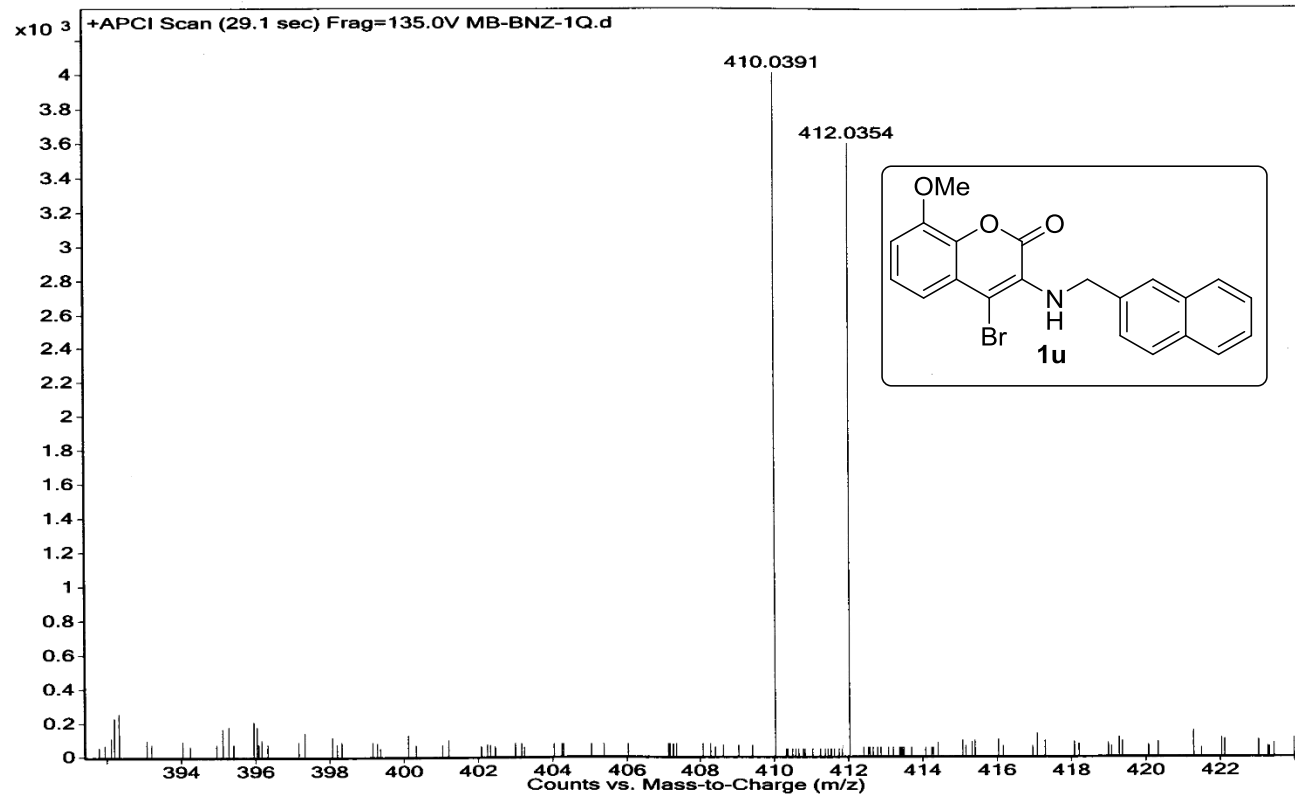

$^1\text{H}$  NMR spectra of **1v**

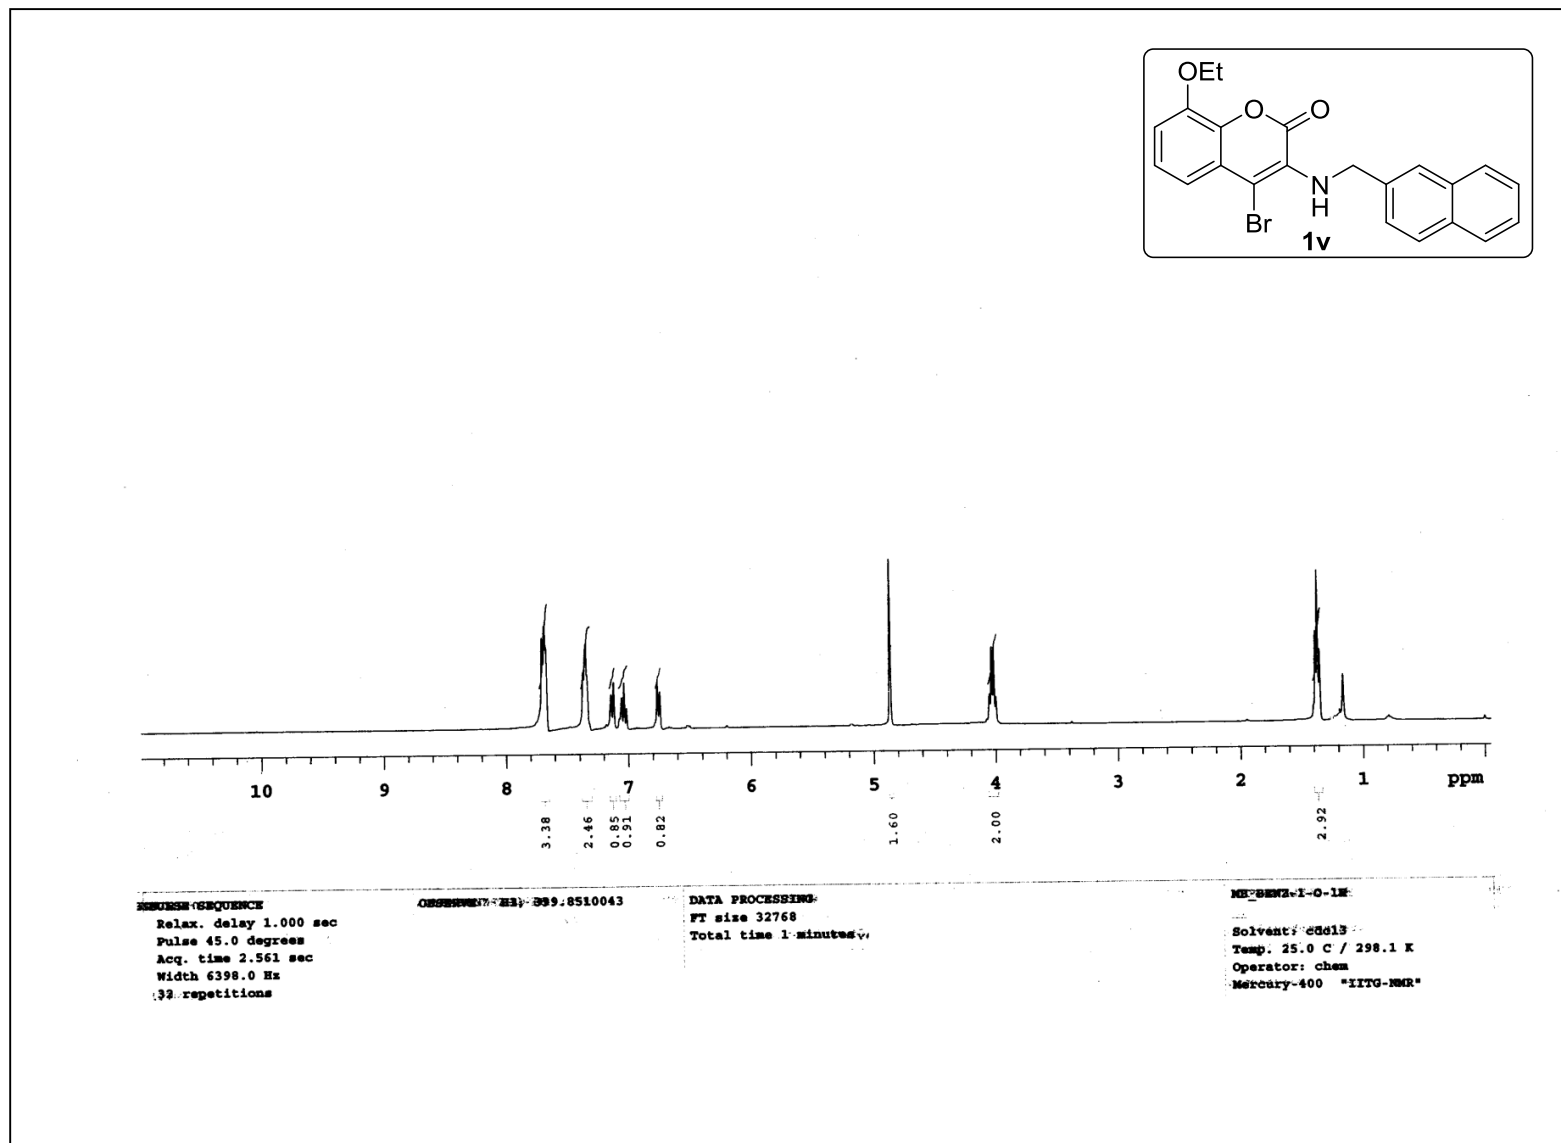

<sup>13</sup>C NMR spectra of **1v**

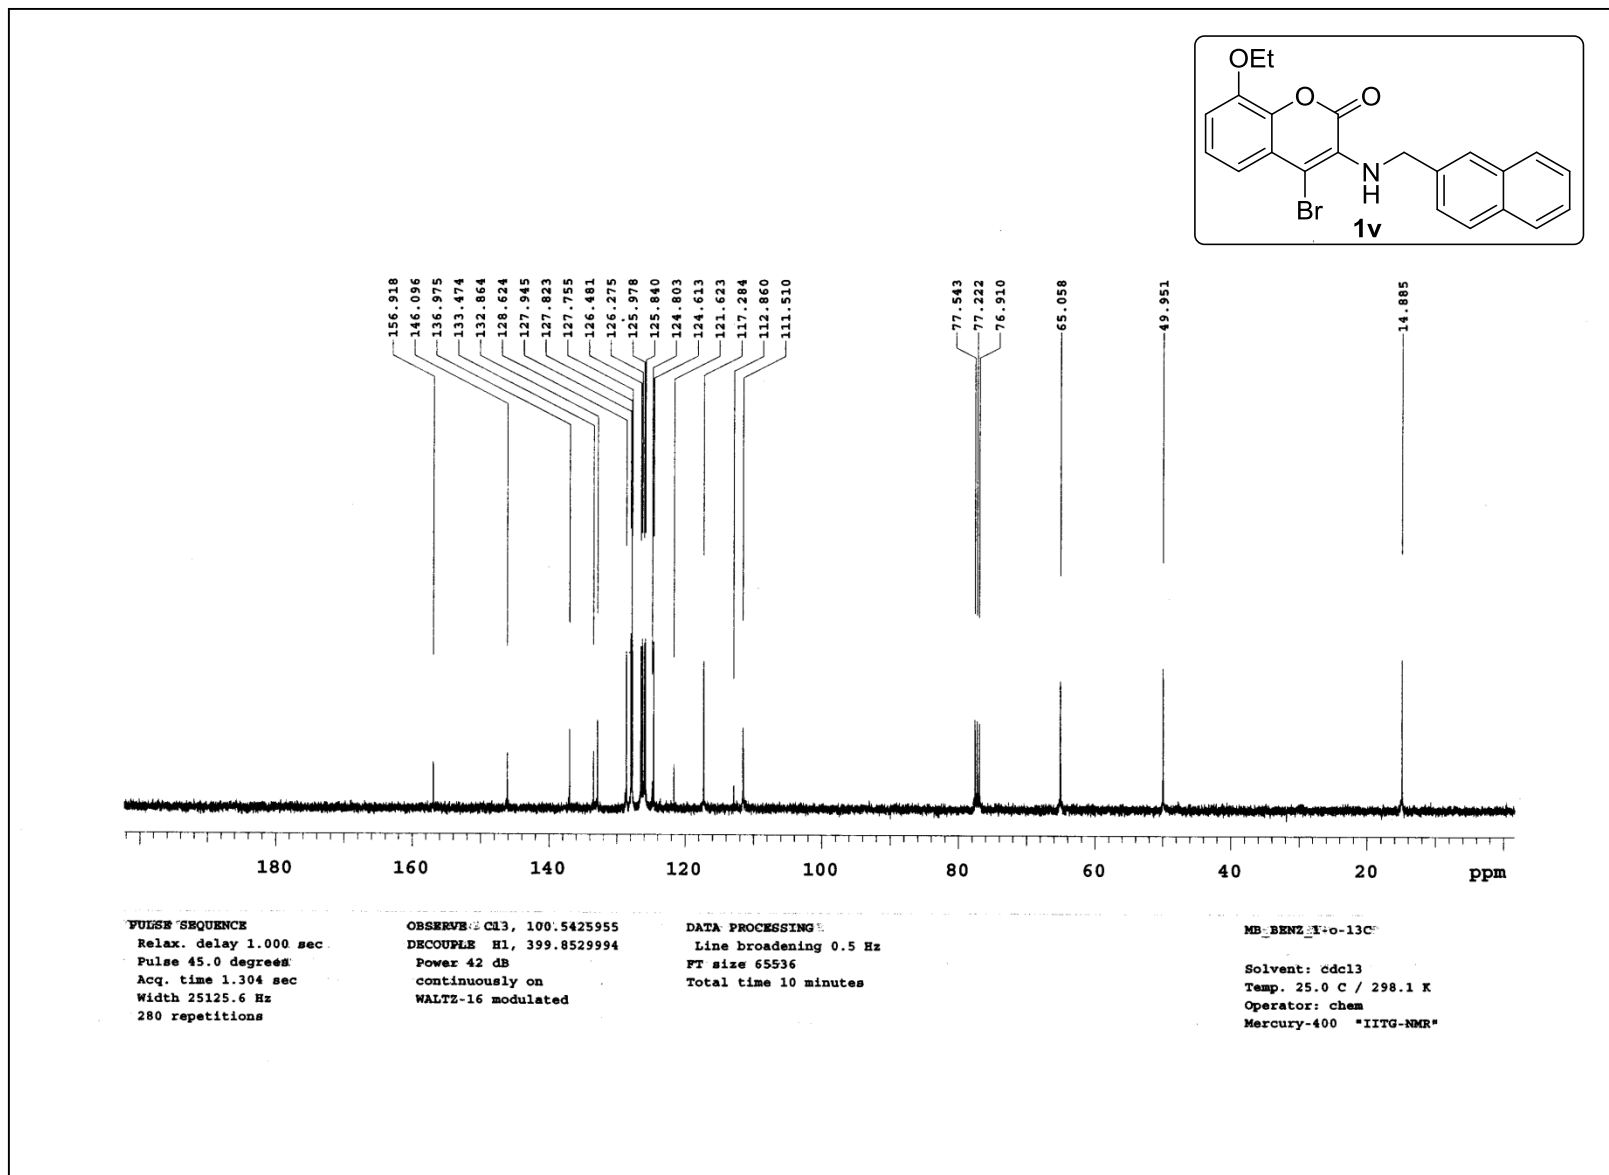

# HRMS spectra of **1v**

|                      |             |                    |        |                        |              |                               |                      |
|----------------------|-------------|--------------------|--------|------------------------|--------------|-------------------------------|----------------------|
| <b>Sample Name</b>   | MB-BNZ-10   | <b>Position</b>    | Vial 1 | <b>Instrument Name</b> | Instrument 1 | <b>User Name</b>              |                      |
| <b>Inj Vol</b>       | -10         | <b>InjPosition</b> |        | <b>SampleType</b>      | Sample       | <b>IRM Calibration Status</b> | Success              |
| <b>Data Filename</b> | MB-BNZ-10.d | <b>ACQ Method</b>  |        | <b>Comment</b>         |              | <b>Acquired Time</b>          | 8/13/2015 3:13:29 PM |

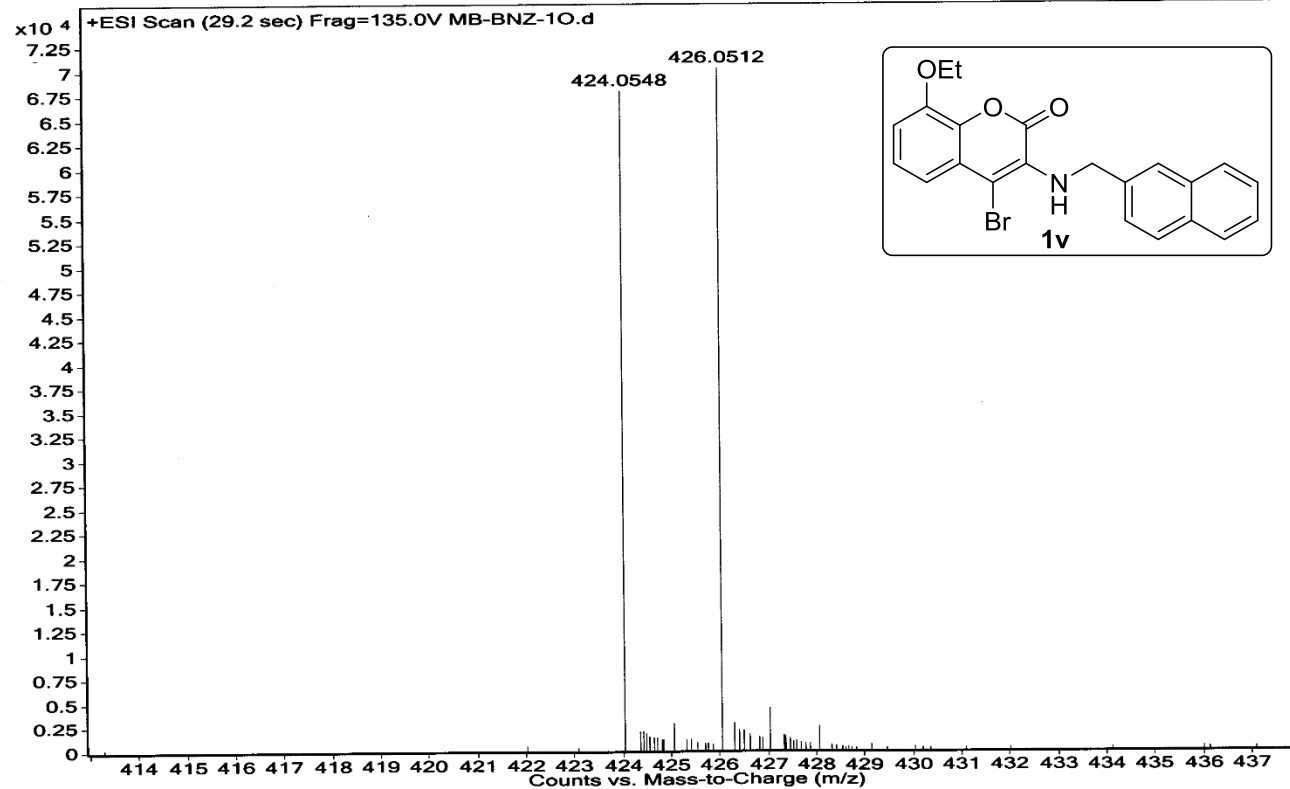



<sup>1</sup>H NMR spectra of **2a**

MS-BT-1-14-1H

Sample Name:

MS-BT-1-14-1H

Data Collected on:

IITG-NMR-mercury400

Archive directory:

Sample directory:

FidFile: PROTON

Pulse Sequence: PROTON (s2pul)

Solvent: cdcl3

Data collected on: Feb 21 2014

Temp. 25.0 C / 298.1 K

Operator: chem

Relax. delay 1.000 sec

Pulse 45.0 degrees

Acq. time 2.561 sec

Width 6398.0 Hz

64 repetitions

OBSERVE H1, 399.8509606 MHz

DATA PROCESSING

FT size 32768

Total time 4 min 24 sec

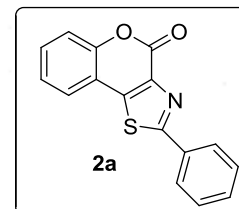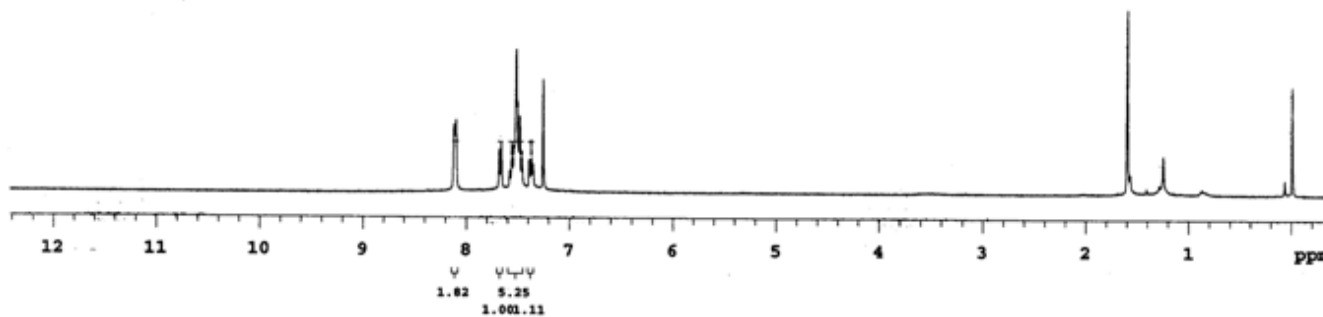

<sup>13</sup>C NMR of 2a

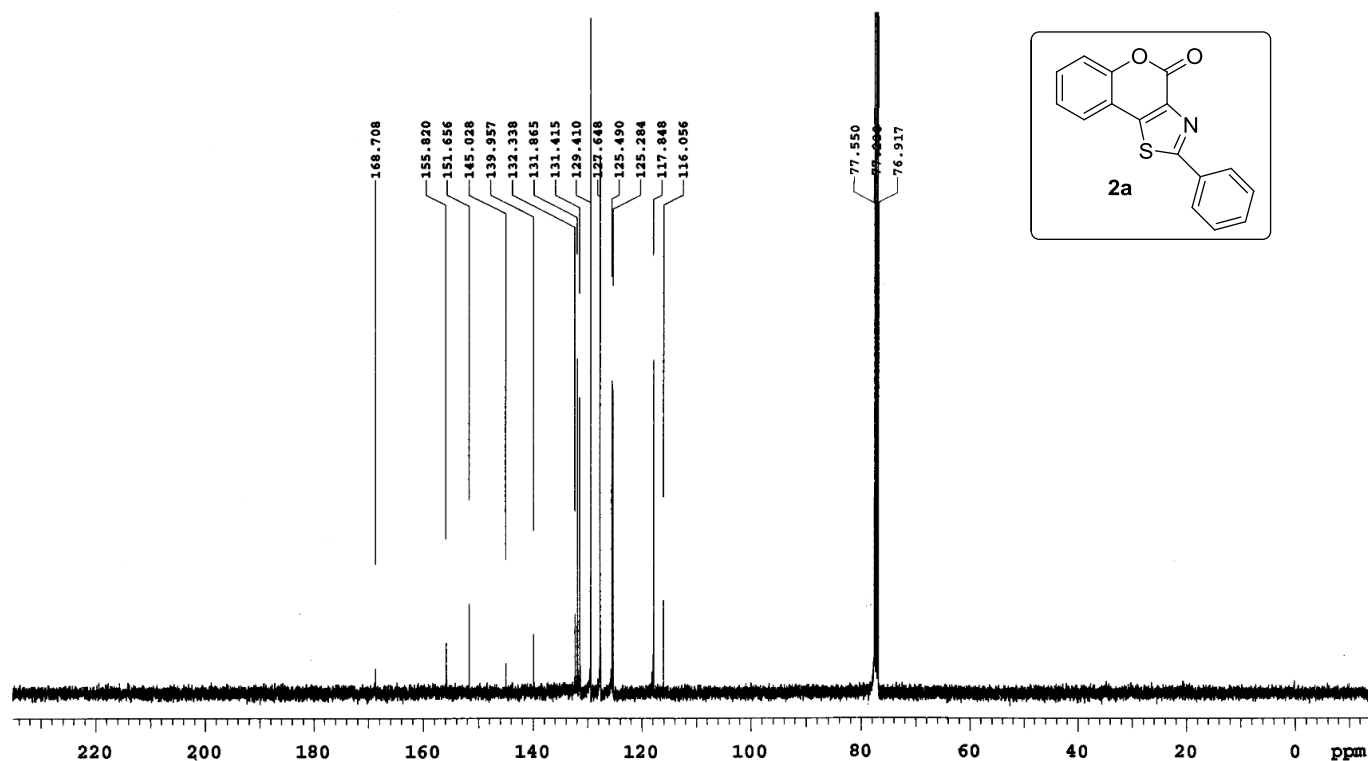

|                                                                                                                                      |                                                                                                                            |                                                                                           |                                                                                                                                         |
|--------------------------------------------------------------------------------------------------------------------------------------|----------------------------------------------------------------------------------------------------------------------------|-------------------------------------------------------------------------------------------|-----------------------------------------------------------------------------------------------------------------------------------------|
| <b>PULSE SEQUENCE</b><br>Relax. delay 1.000 sec<br>Pulse 45.0 degrees<br>Acq. time 1.304 sec<br>Width 25125.6 Hz<br>5484 repetitions | <b>OBSERVE</b> C13, 100.5425824<br><b>DECOUPLE</b> H1, 399.8529994<br>Power 42 dB<br>continuously on<br>WALTZ-16 modulated | <b>DATA PROCESSING</b><br>Line broadening 0.5 Hz<br>FT size 65536<br>Total time 3.5 hours | <b>MB-B-1-1-14-13C</b><br>Solvent: cdcl3<br>Temp. 25.0 C / 298.1 K<br>Operator: chem<br>File: MB-B-1-1-14-13C<br>Mercury-400 "IITG-NMR" |
|--------------------------------------------------------------------------------------------------------------------------------------|----------------------------------------------------------------------------------------------------------------------------|-------------------------------------------------------------------------------------------|-----------------------------------------------------------------------------------------------------------------------------------------|

# HRMS Spectra of 2a

|                      |              |                    |    |                        |              |                               |                     |
|----------------------|--------------|--------------------|----|------------------------|--------------|-------------------------------|---------------------|
| <b>Sample Name</b>   | MB-BT-1-14   | <b>Position</b>    | -1 | <b>Instrument Name</b> | Instrument 1 | <b>User Name</b>              |                     |
| <b>Inj Vol</b>       | -10          | <b>InjPosition</b> |    | <b>SampleType</b>      | Sample       | <b>IRM Calibration Status</b> | Success             |
| <b>Data Filename</b> | MB-BT-1-14.d | <b>ACQ Method</b>  |    | <b>Comment</b>         |              | <b>Acquired Time</b>          | 5/6/2014 2:46:43 PM |

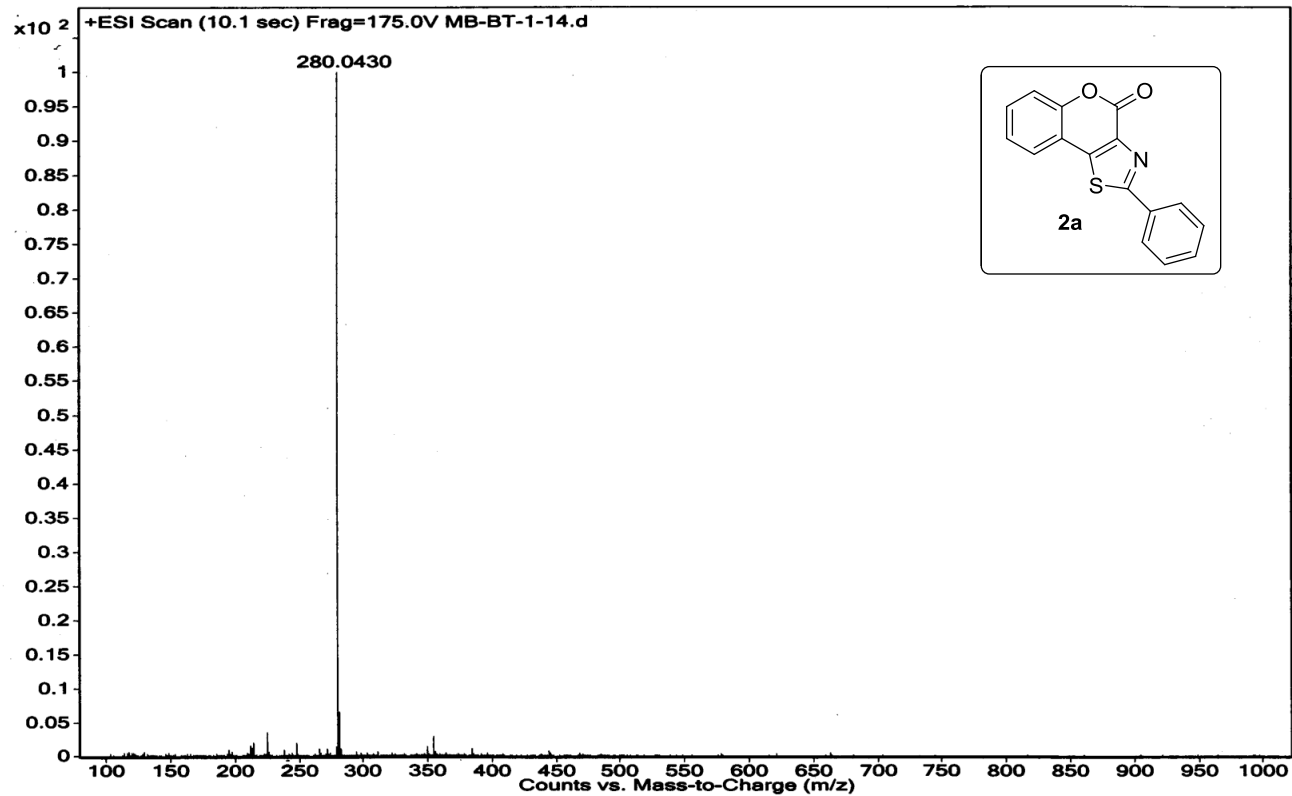

H<sup>1</sup>NMR spectra of **2b**

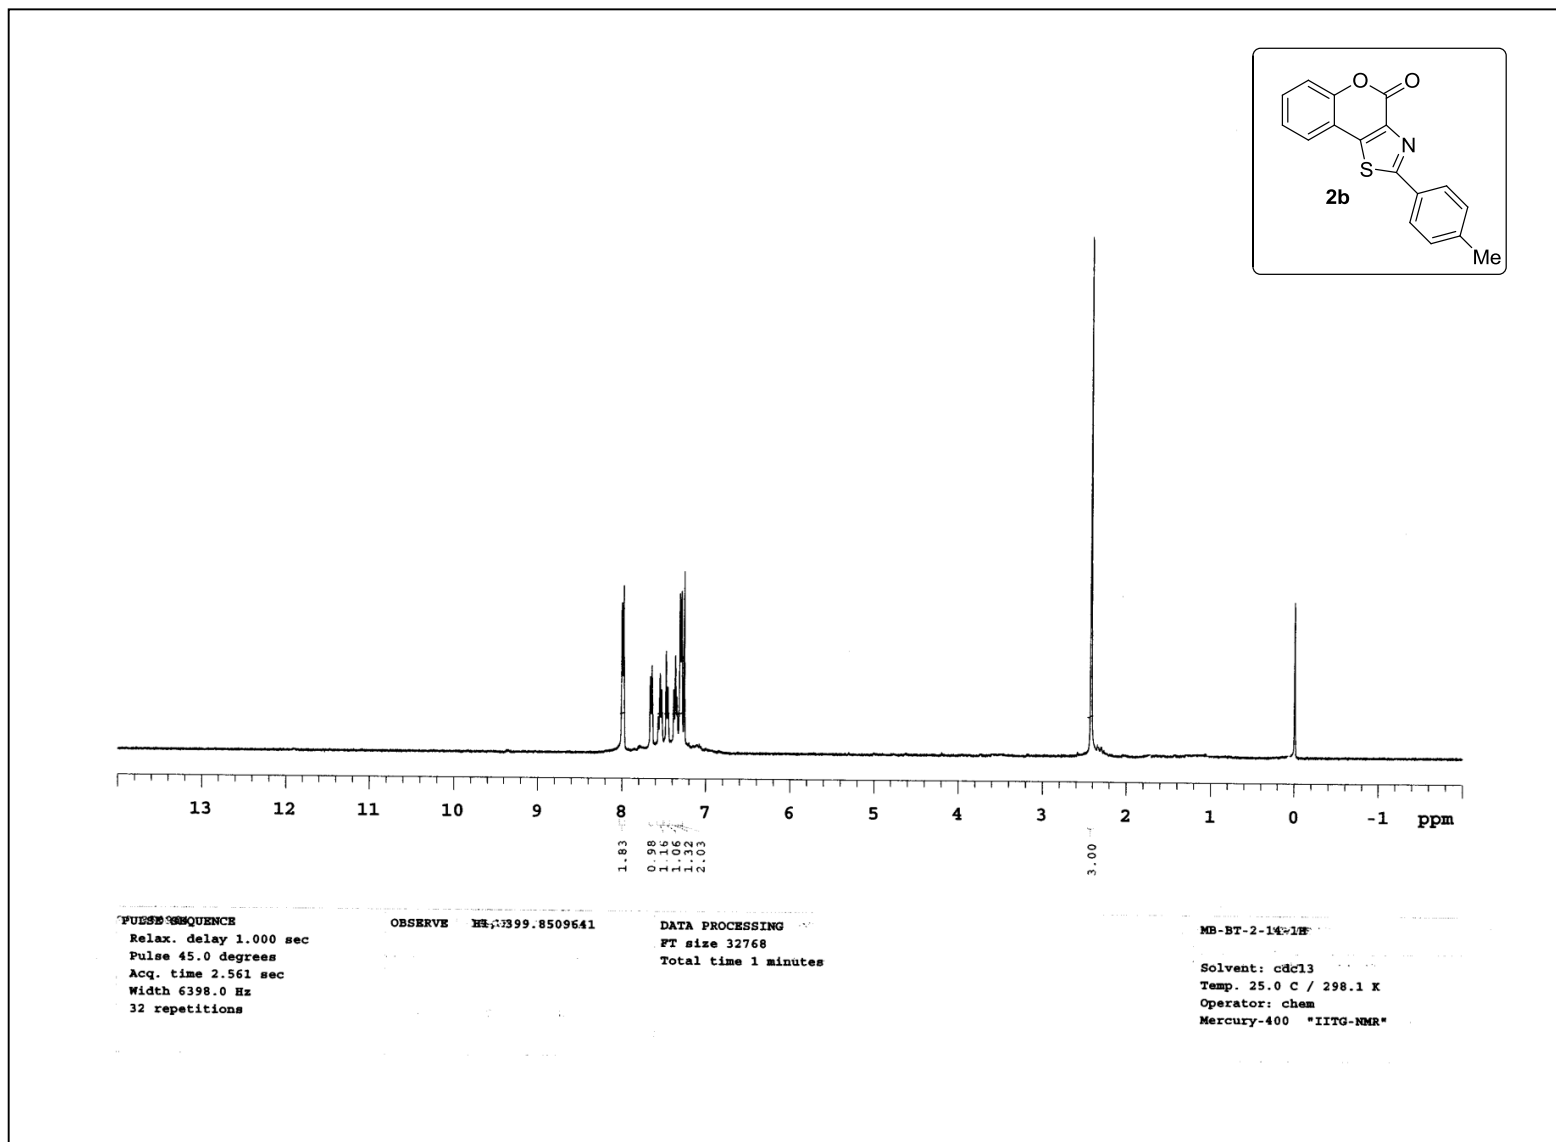

<sup>13</sup>C NMR spectra of **2b**

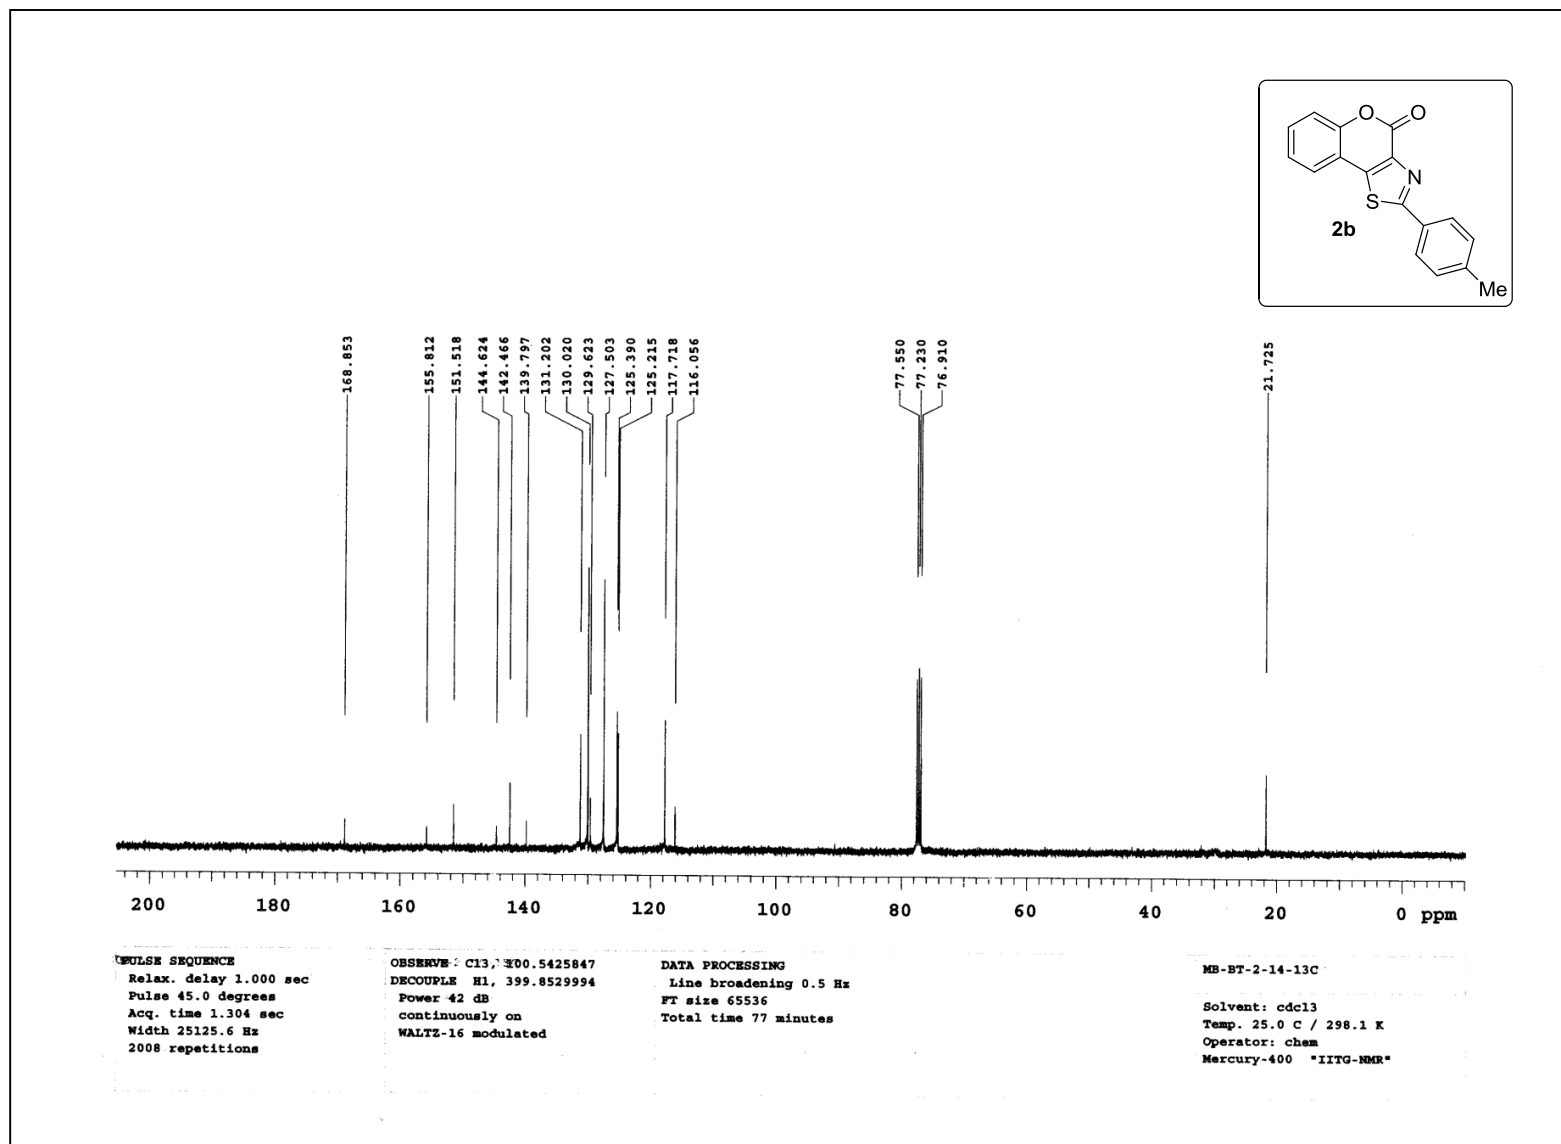

# HRMS Spectra of 2b

|               |              |             |    |                 |              |                        |                     |
|---------------|--------------|-------------|----|-----------------|--------------|------------------------|---------------------|
| Sample Name   | MB-BT-2-14   | Position    | -1 | Instrument Name | Instrument 1 | User Name              |                     |
| Inj Vol       | -10          | InjPosition |    | SampleType      | Sample       | IRM Calibration Status | Success             |
| Data Filename | MB-BT-2-14.d | ACQ Method  |    | Comment         |              | Acquired Time          | 5/6/2014 2:48:07 PM |

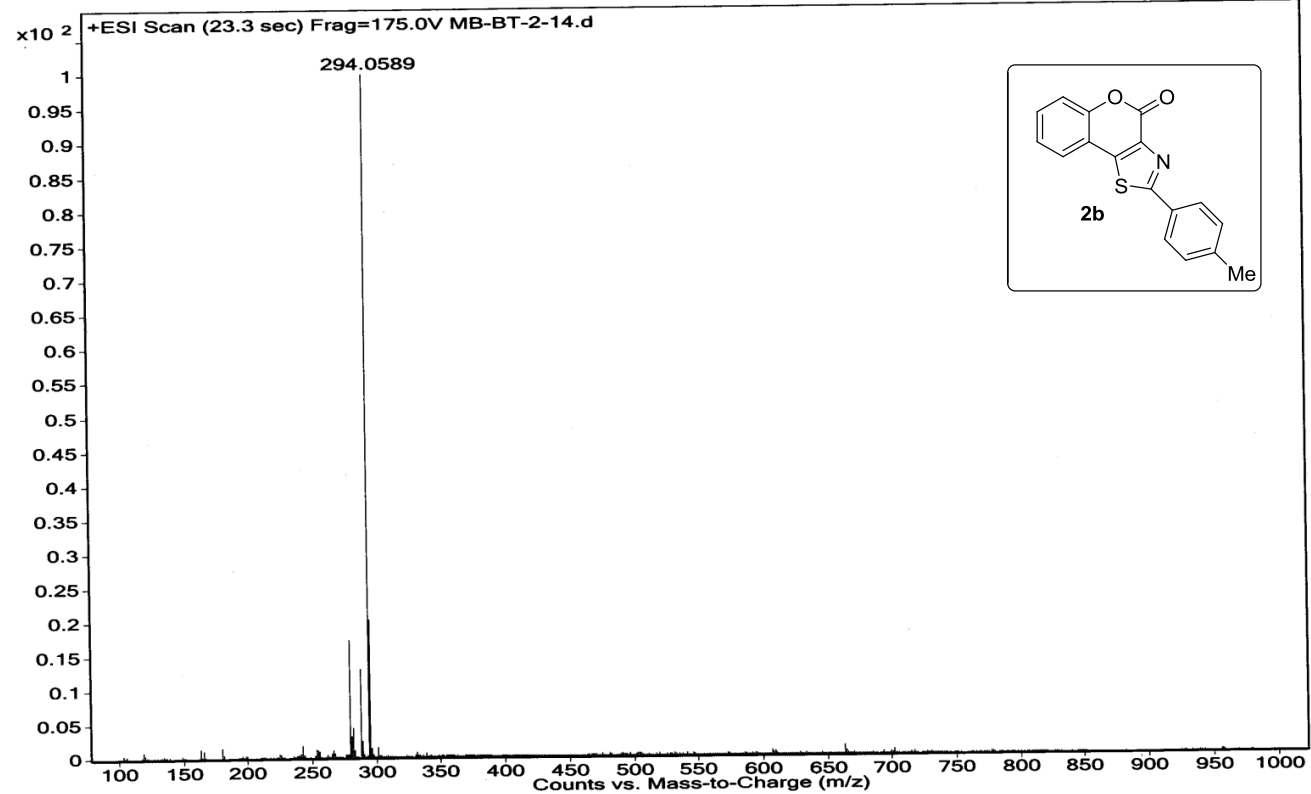

<sup>1</sup>H NMR spectra of **2c**

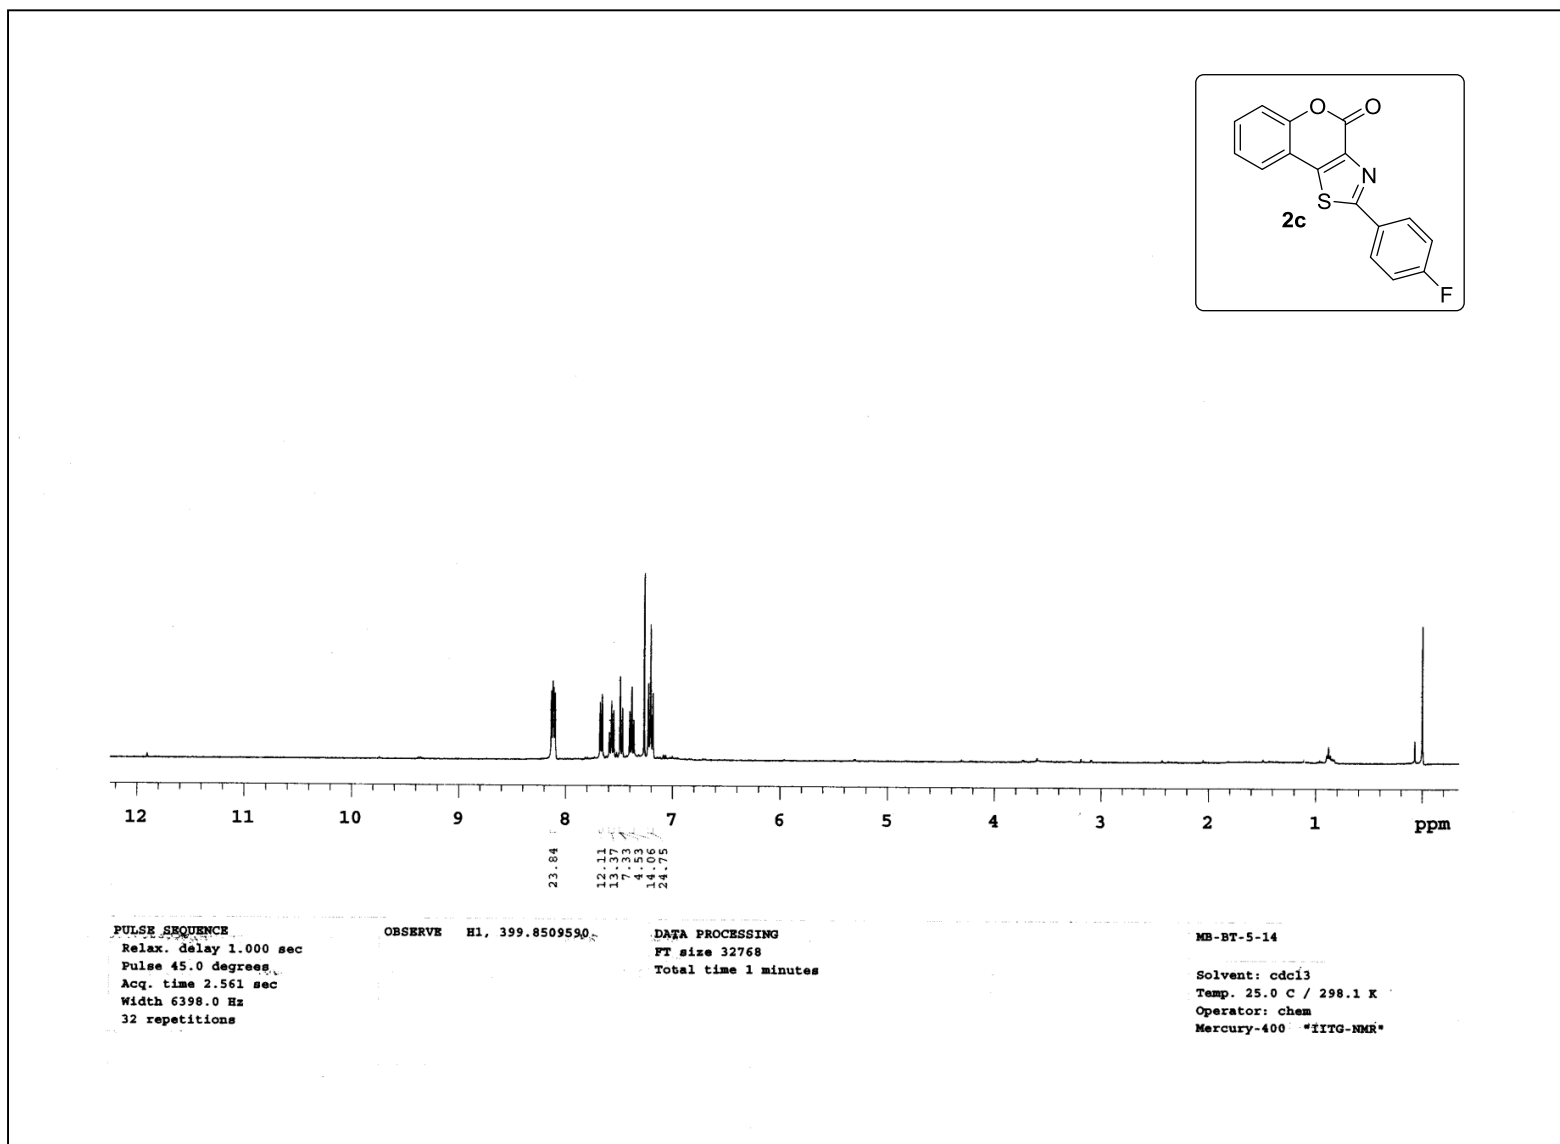

<sup>13</sup>C NMR spectra of **2c**

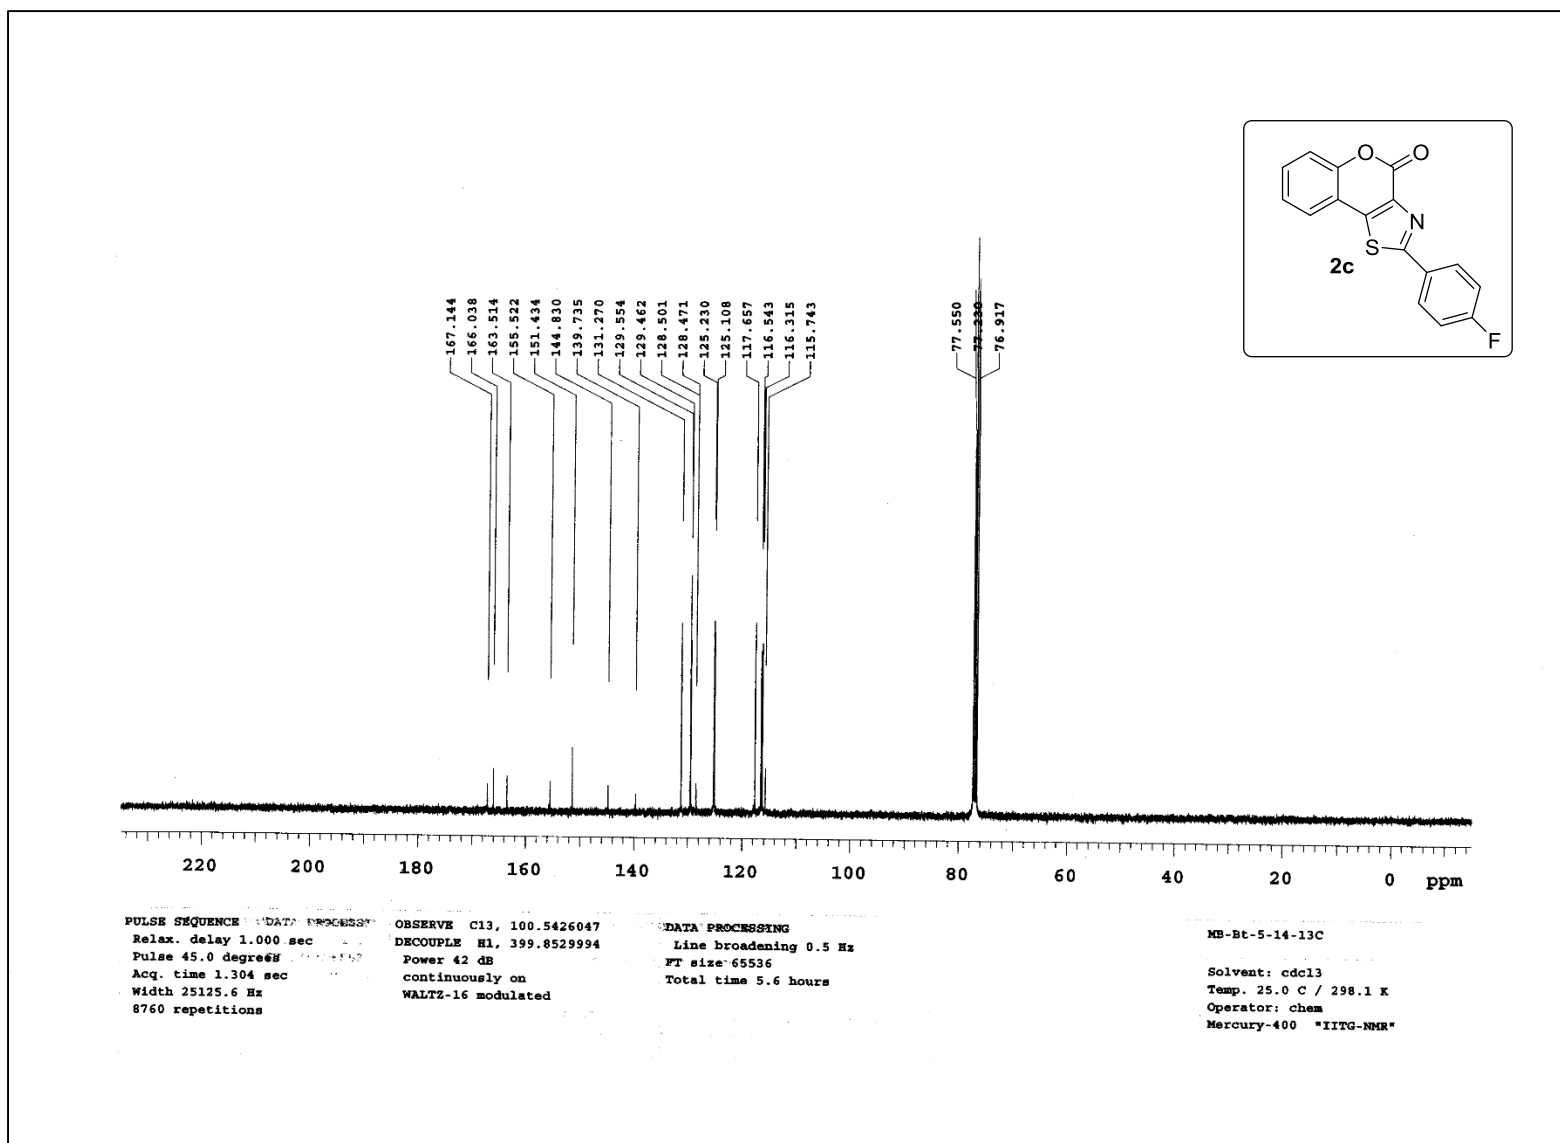



HRMS spectra of **2c**

|                      |              |                    |    |                        |              |                               |                     |
|----------------------|--------------|--------------------|----|------------------------|--------------|-------------------------------|---------------------|
| <b>Sample Name</b>   | MB-BT-5-14   | <b>Position</b>    | -1 | <b>Instrument Name</b> | Instrument 1 | <b>User Name</b>              |                     |
| <b>Inj Vol</b>       | -10          | <b>InjPosition</b> |    | <b>SampleType</b>      | Sample       | <b>IRM Calibration Status</b> | Success             |
| <b>Data Filename</b> | MB-BT-5-14.d | <b>ACQ Method</b>  |    | <b>Comment</b>         |              | <b>Acquired Time</b>          | 5/6/2014 2:52:23 PM |

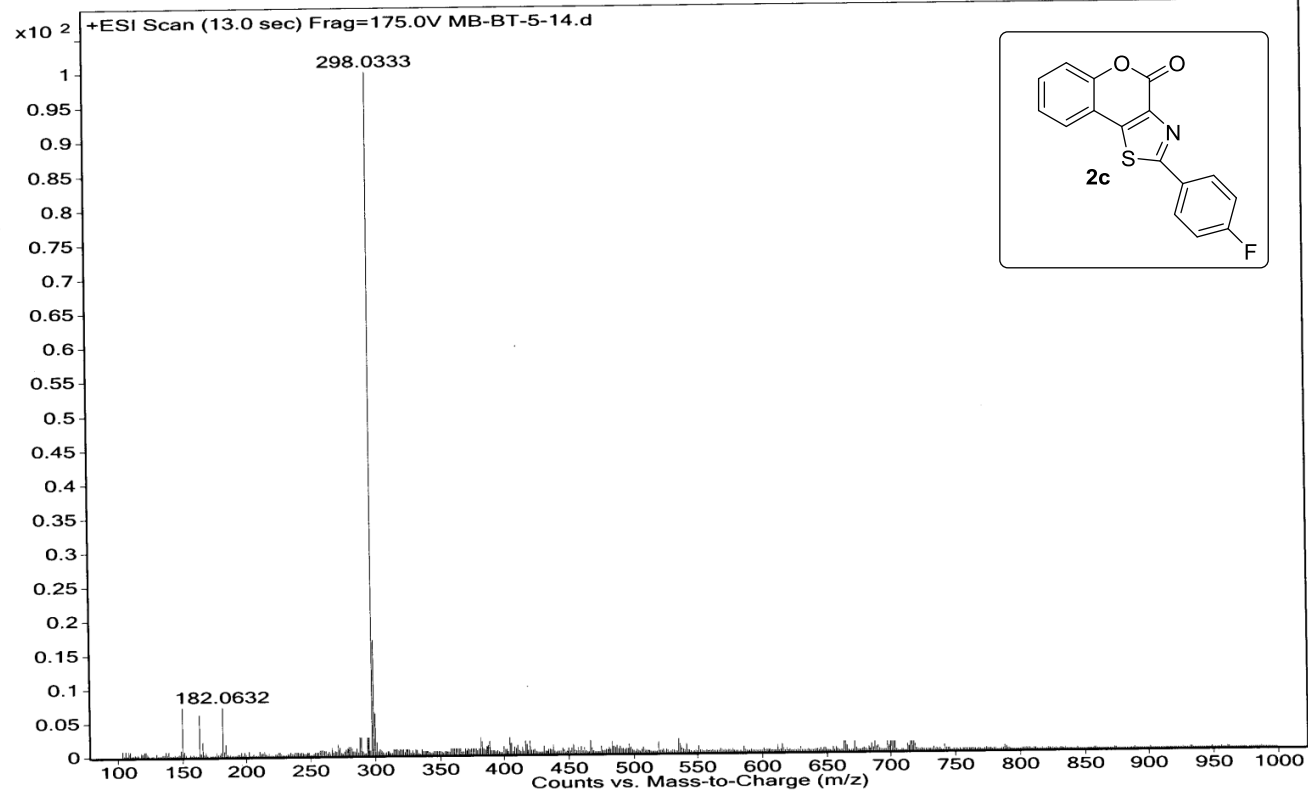

# $^1\text{H}$ NMR spectra of **2d**

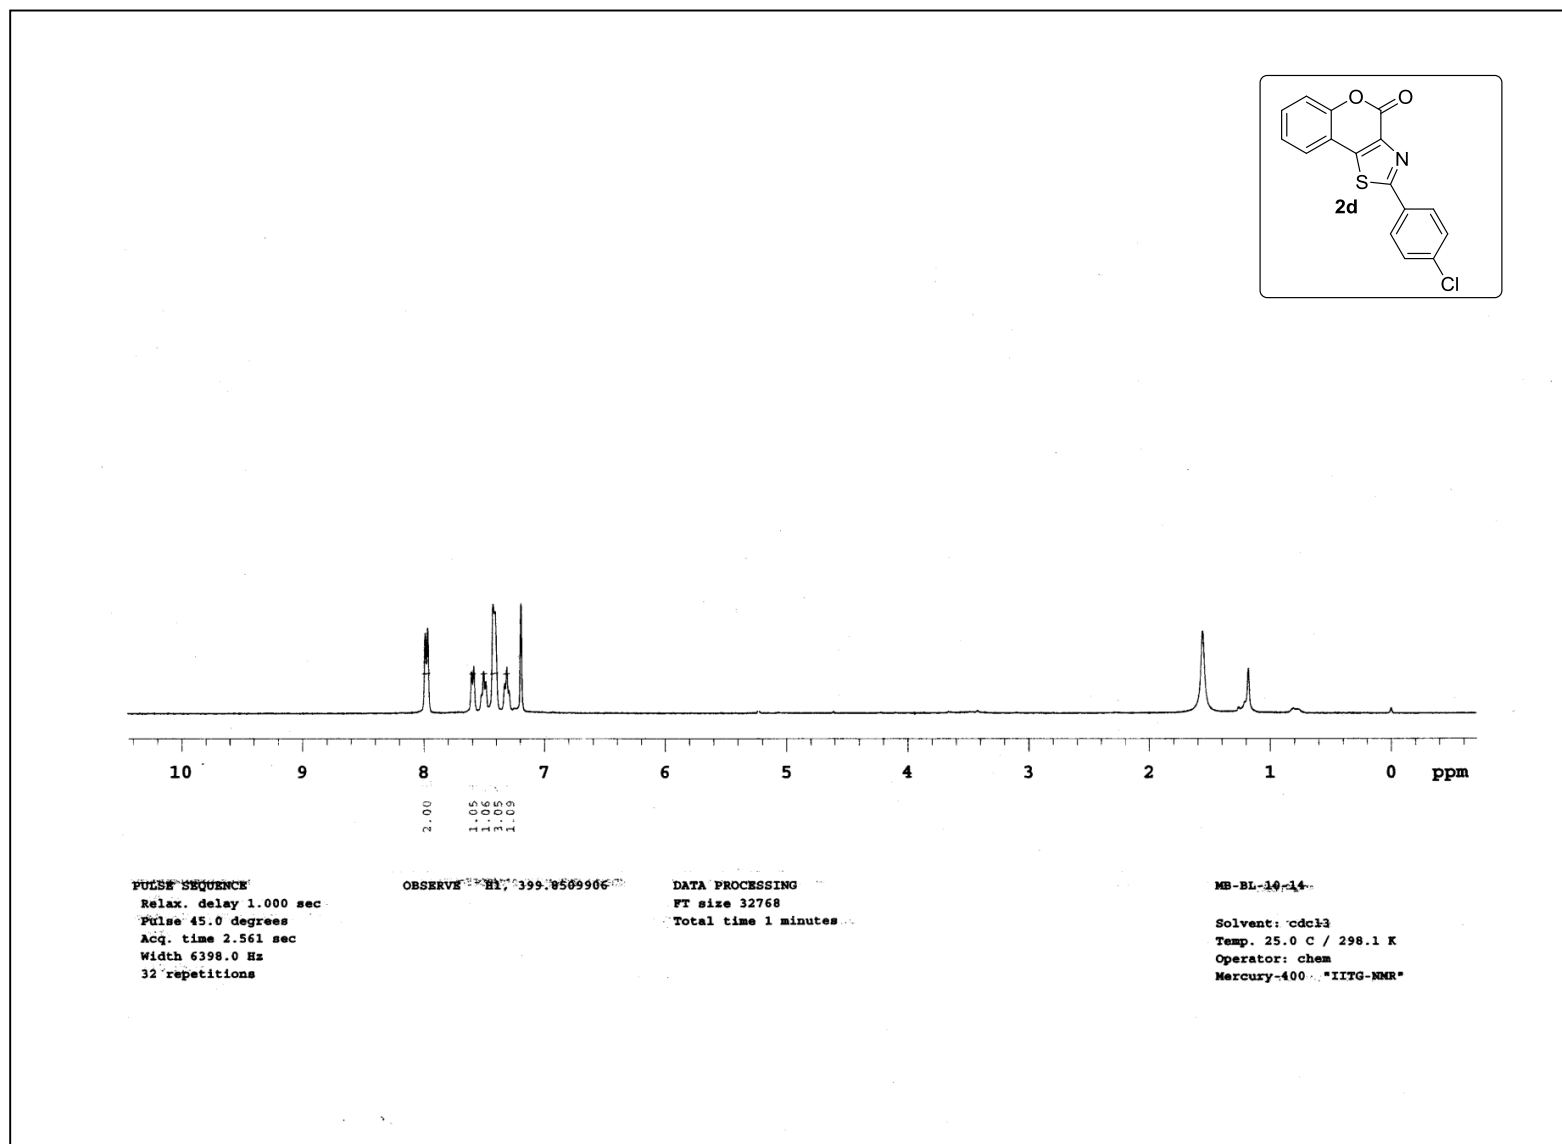

<sup>13</sup>C NMR spectra of **2d**

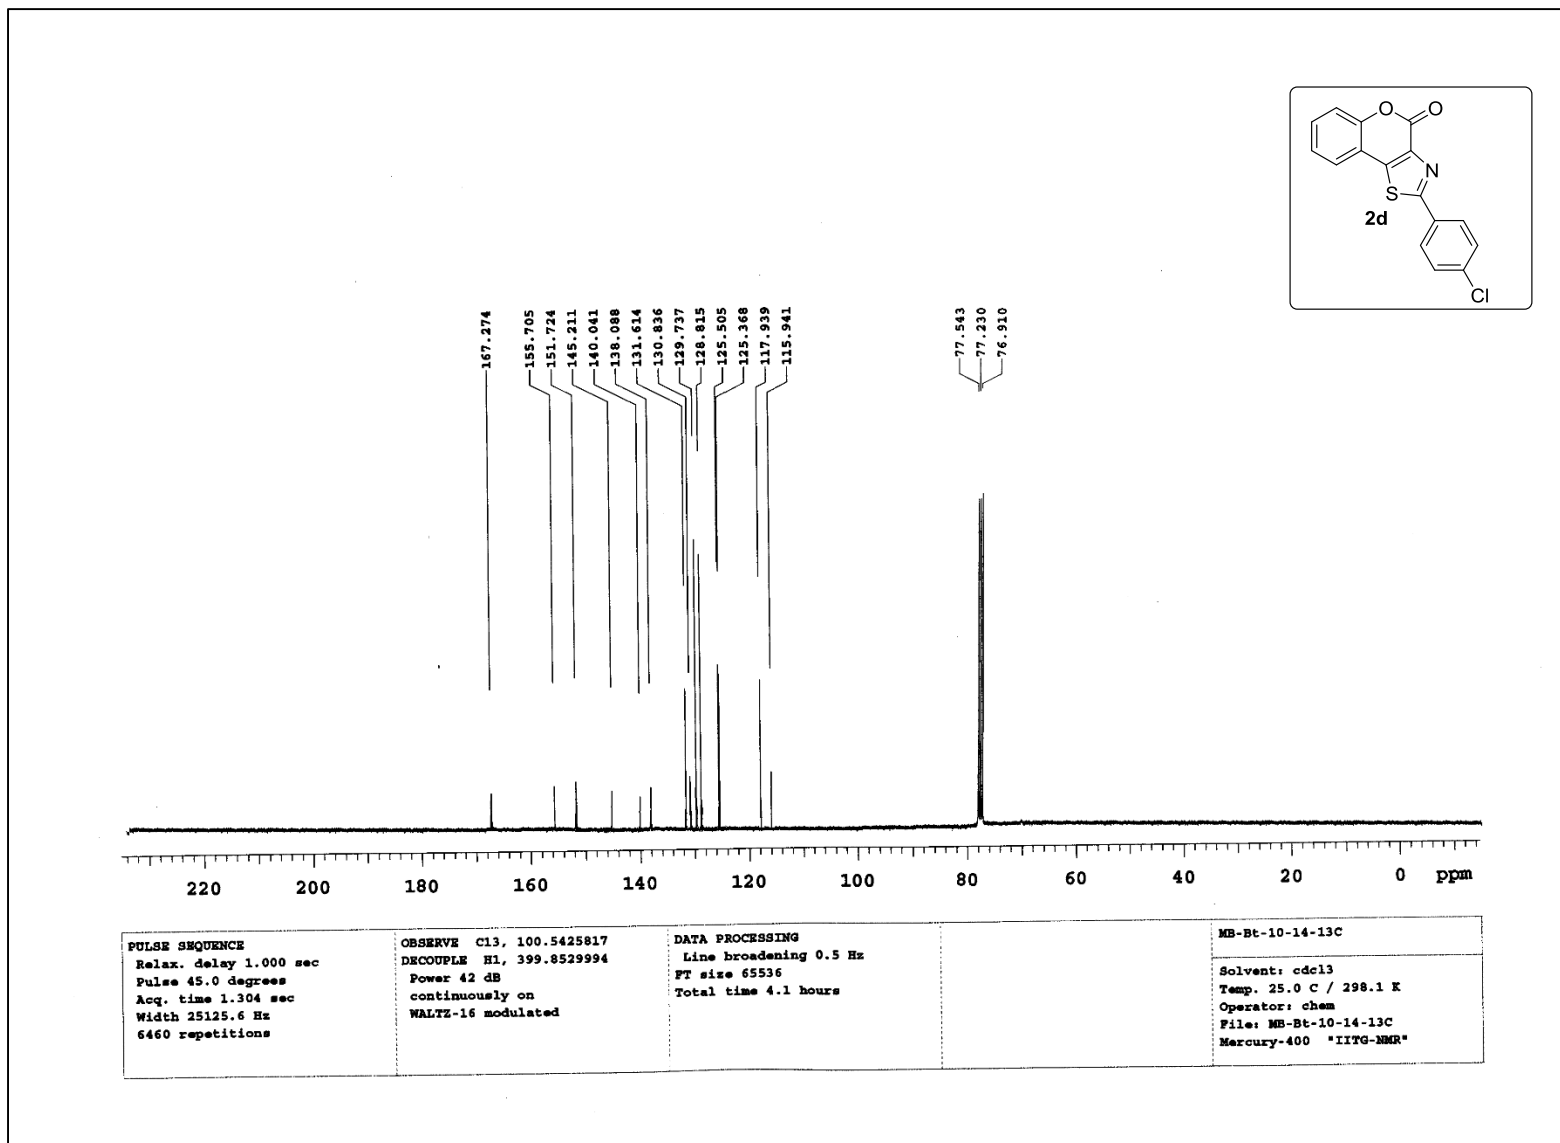

# HRMS spectra of 2d

|               |               |             |             |                 |                                   |                        |             |
|---------------|---------------|-------------|-------------|-----------------|-----------------------------------|------------------------|-------------|
| Sample Name   | Unavailable   | Position    | Unavailable | Instrument Name | Unavailable                       | User Name              | Unavailable |
| Inj Vol       | Unavailable   | InjPosition | Unavailable | SampleType      | Unavailable                       | IRM Calibration Status | Success     |
| Data Filename | MB-BT-10-14.d | ACQ Method  |             | Comment         | Sample information is unavailable | Acquired Time          | Unavailable |

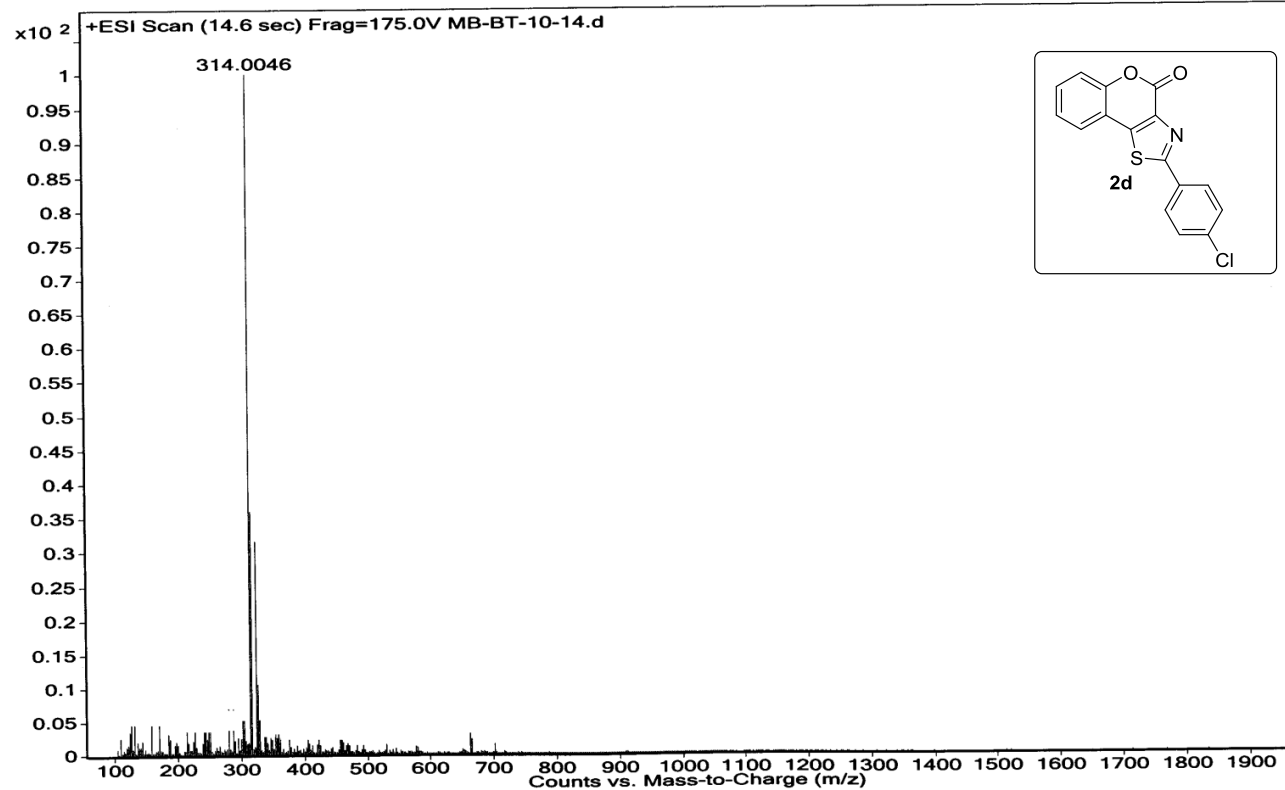

# $^1\text{H}$ NMR spectra of **2e**

Sample Name:  
MB-Bt-17-14-1H  
Data Collected on:  
IITG-NMR-mercury400  
Archive directory:  
  
Sample directory:  
  
FidFile: MB-Bt-17-14-1H  
  
Pulse Sequence: PROTON (s2pul)  
Solvent: cdcl3  
Data collected on: Jun 18 2014

Temp. 25.0 C / 298.1 K  
Operator: chem

Relax. delay 1.000 sec  
Pulse 45.0 degrees  
Acq. time 2.561 sec  
Width 6398.0 Hz  
64 repetitions  
OBSERVE H1, 399.8509641 MHz  
DATA PROCESSING  
FT size 32768  
Total time 4 min 24 sec

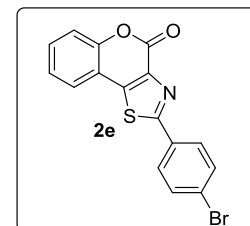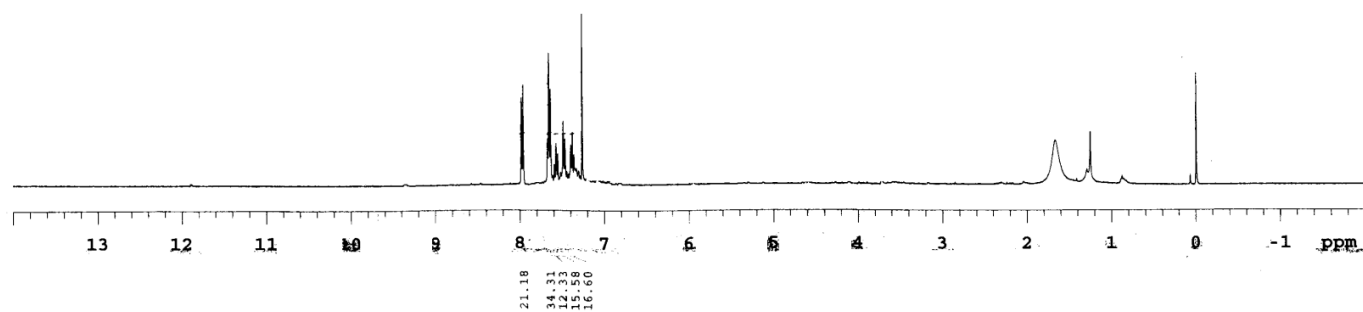

<sup>13</sup>C NMR spectra of **2e**

MB-Bt-17-14-13C

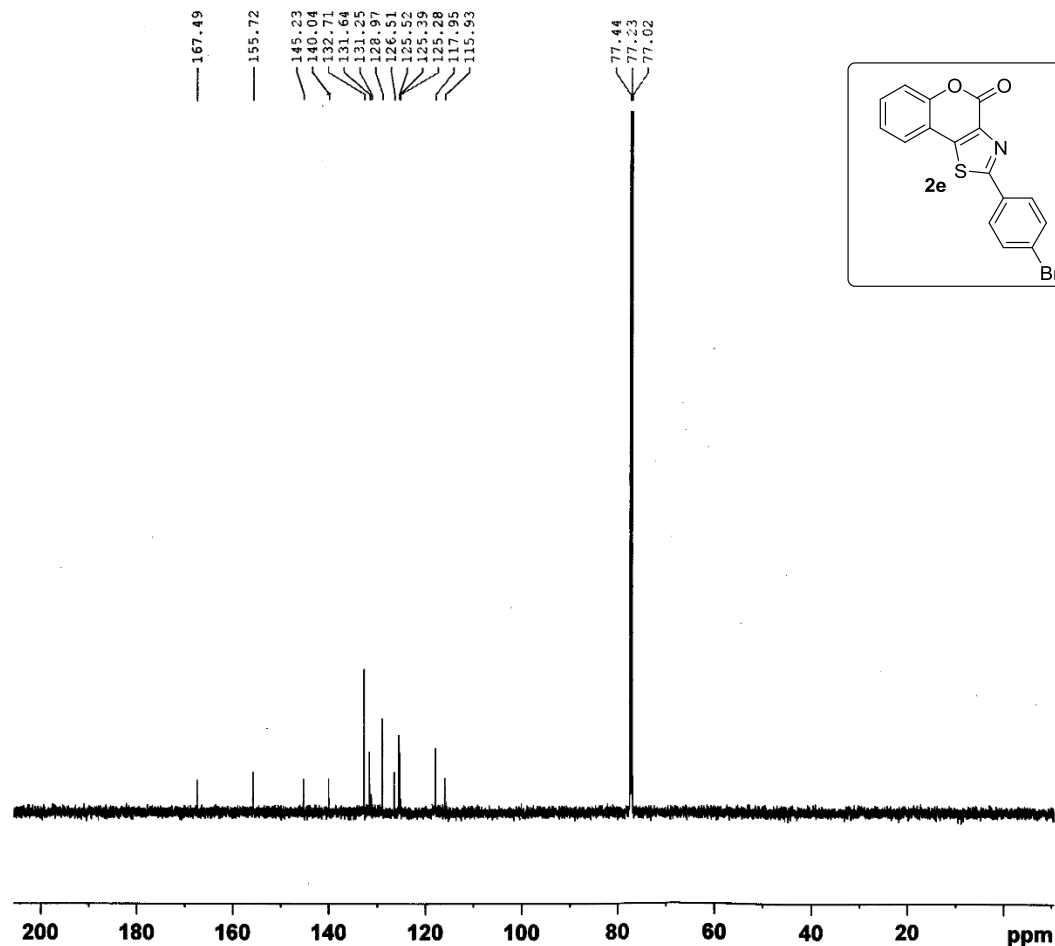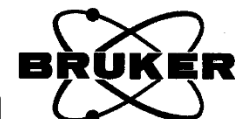

Current Data Parameters  
NAME MB-Bt-17-14-13C  
EXPNO 1  
PROCNO 1

F2 - Acquisition Parameters  
Date\_ 20140619  
Time\_ 9.07  
INSTRUM spect  
PROBHD 5 mm PABBO BB/  
PULPROG zgpg30  
TD 32768  
SOLVENT CDC13  
NS 407  
DS 2  
SWH 36057.691 Hz  
FIDRES 1.100393 Hz  
AQ 0.4543829 sec  
RG 65.24  
DW 13.867 usec  
DE 6.50 usec  
TE 300.4 K  
D1 2.00000000 sec  
D11 0.03000000 sec  
TD0 1

===== CHANNEL f1 =====  
SFO1 150.9279571 MHz  
NUC1 13C  
P1 10.50 usec  
PLW1 95.00000000 W

===== CHANNEL f2 =====  
SFO2 600.1724007 MHz  
NUC2 1H  
CPDPRG[2] waltz16  
PCPD2 70.00 usec  
PLW2 21.00000000 W  
PLW12 0.61714000 W  
PLW13 0.30239999 W

F2 - Processing parameters  
SI 16384  
SF 150.9128347 MHz  
WDW EM  
SSB 0  
LB 1.00 Hz  
GB 0  
PC 1.40

HRMS spectra of **2e**

| Sample Name   | Position    | Instrument Name | User Name              |
|---------------|-------------|-----------------|------------------------|
| Inj Vol       | InjPosition | SampleType      | IRM Calibration Status |
| Data Filename | ACQ Method  | Comment         | Acquired Time          |

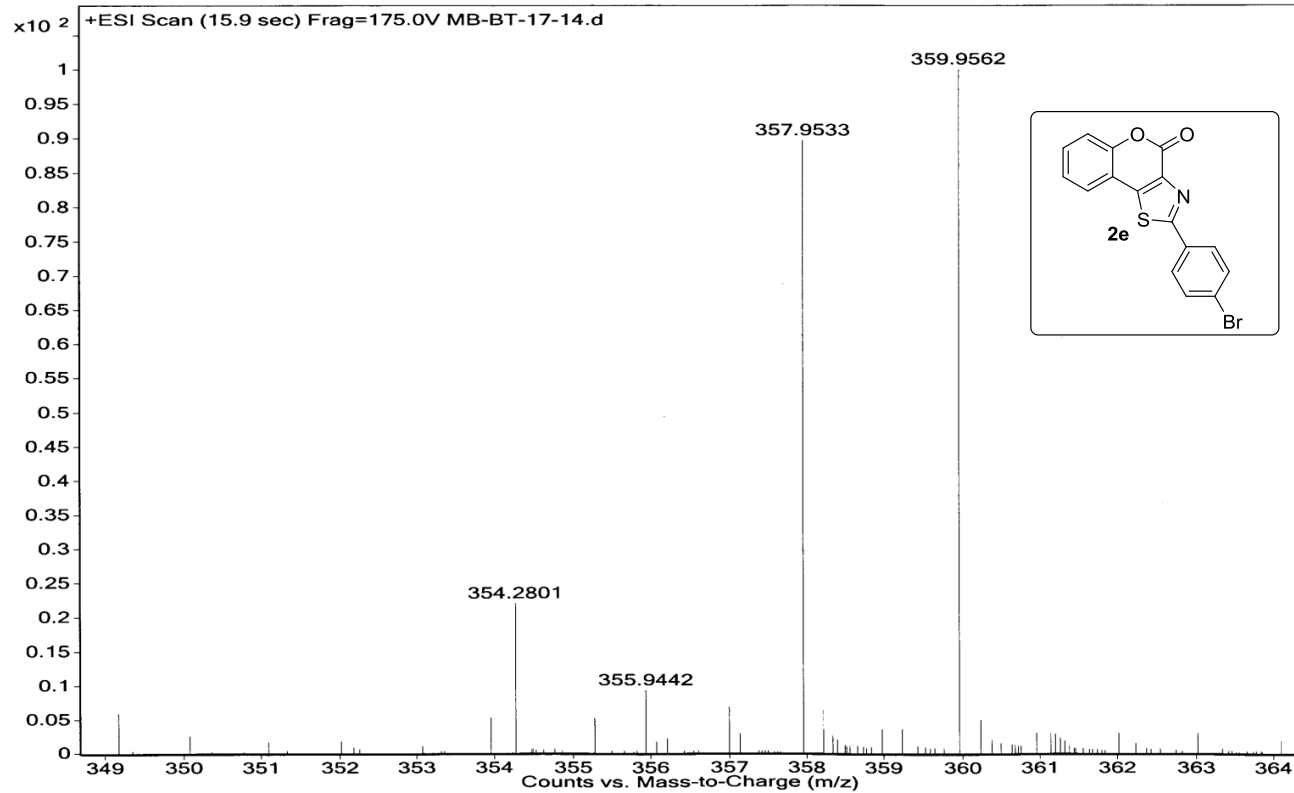

<sup>1</sup>H NMR spectra of **2f**

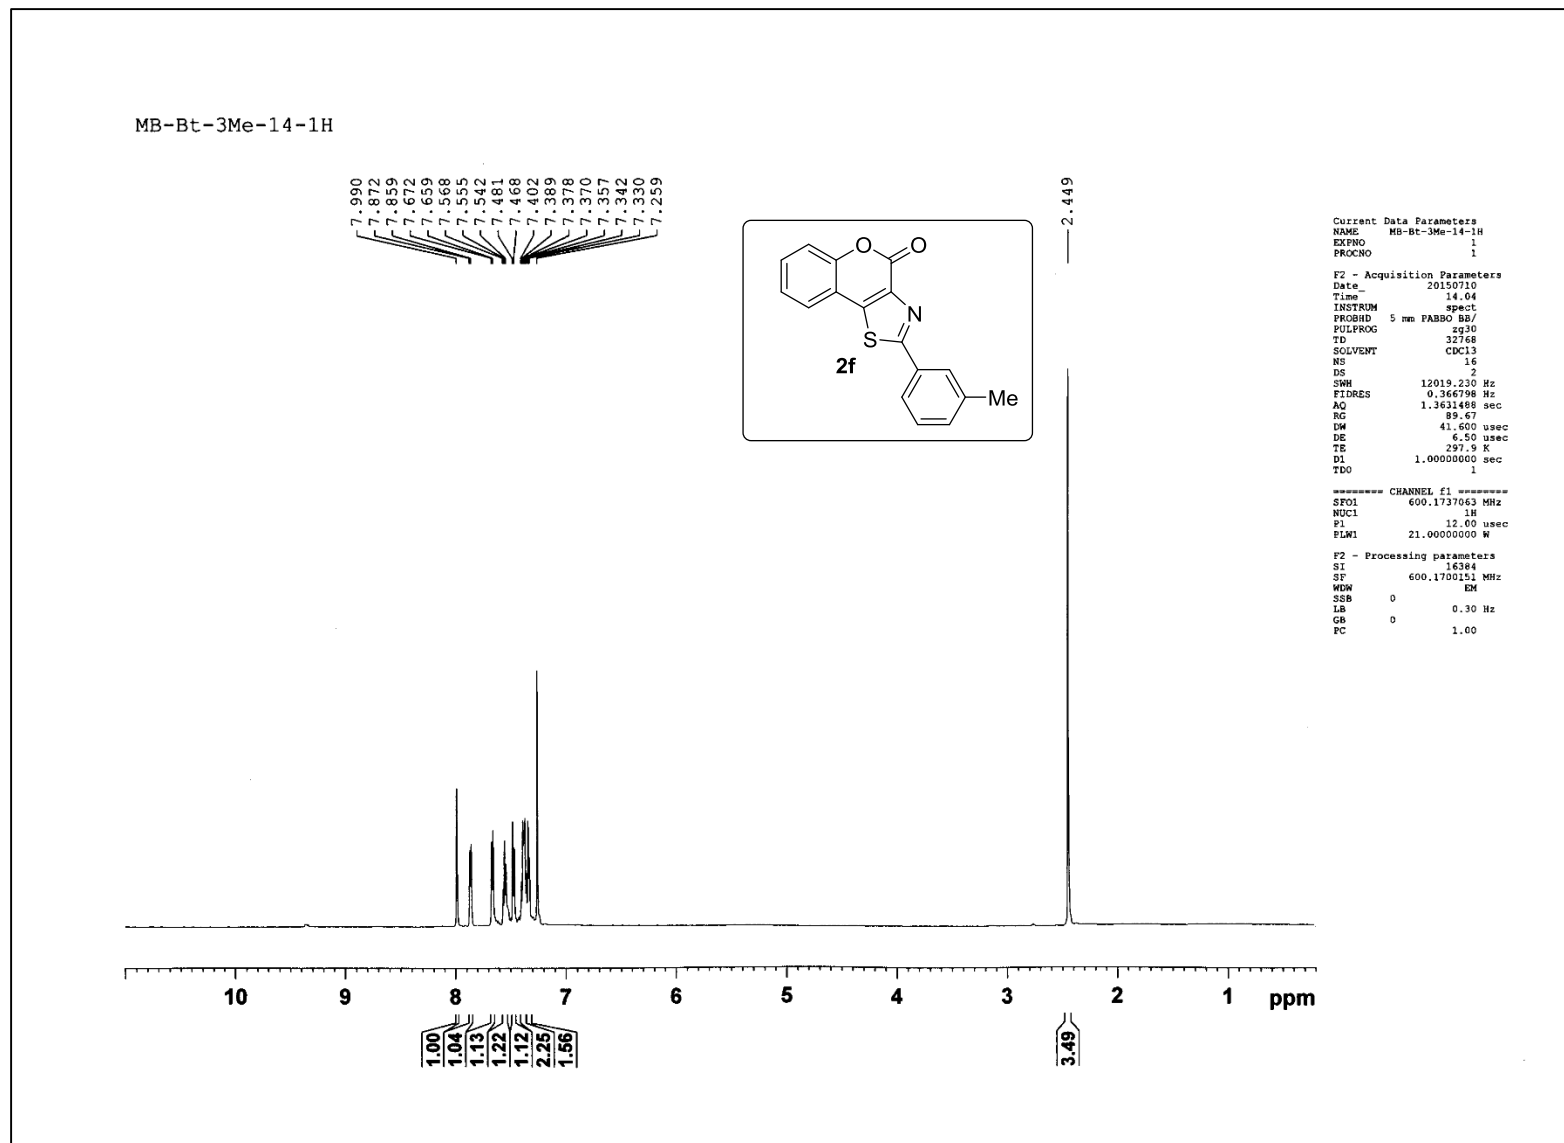



<sup>13</sup>C NMR spectra of **2f**

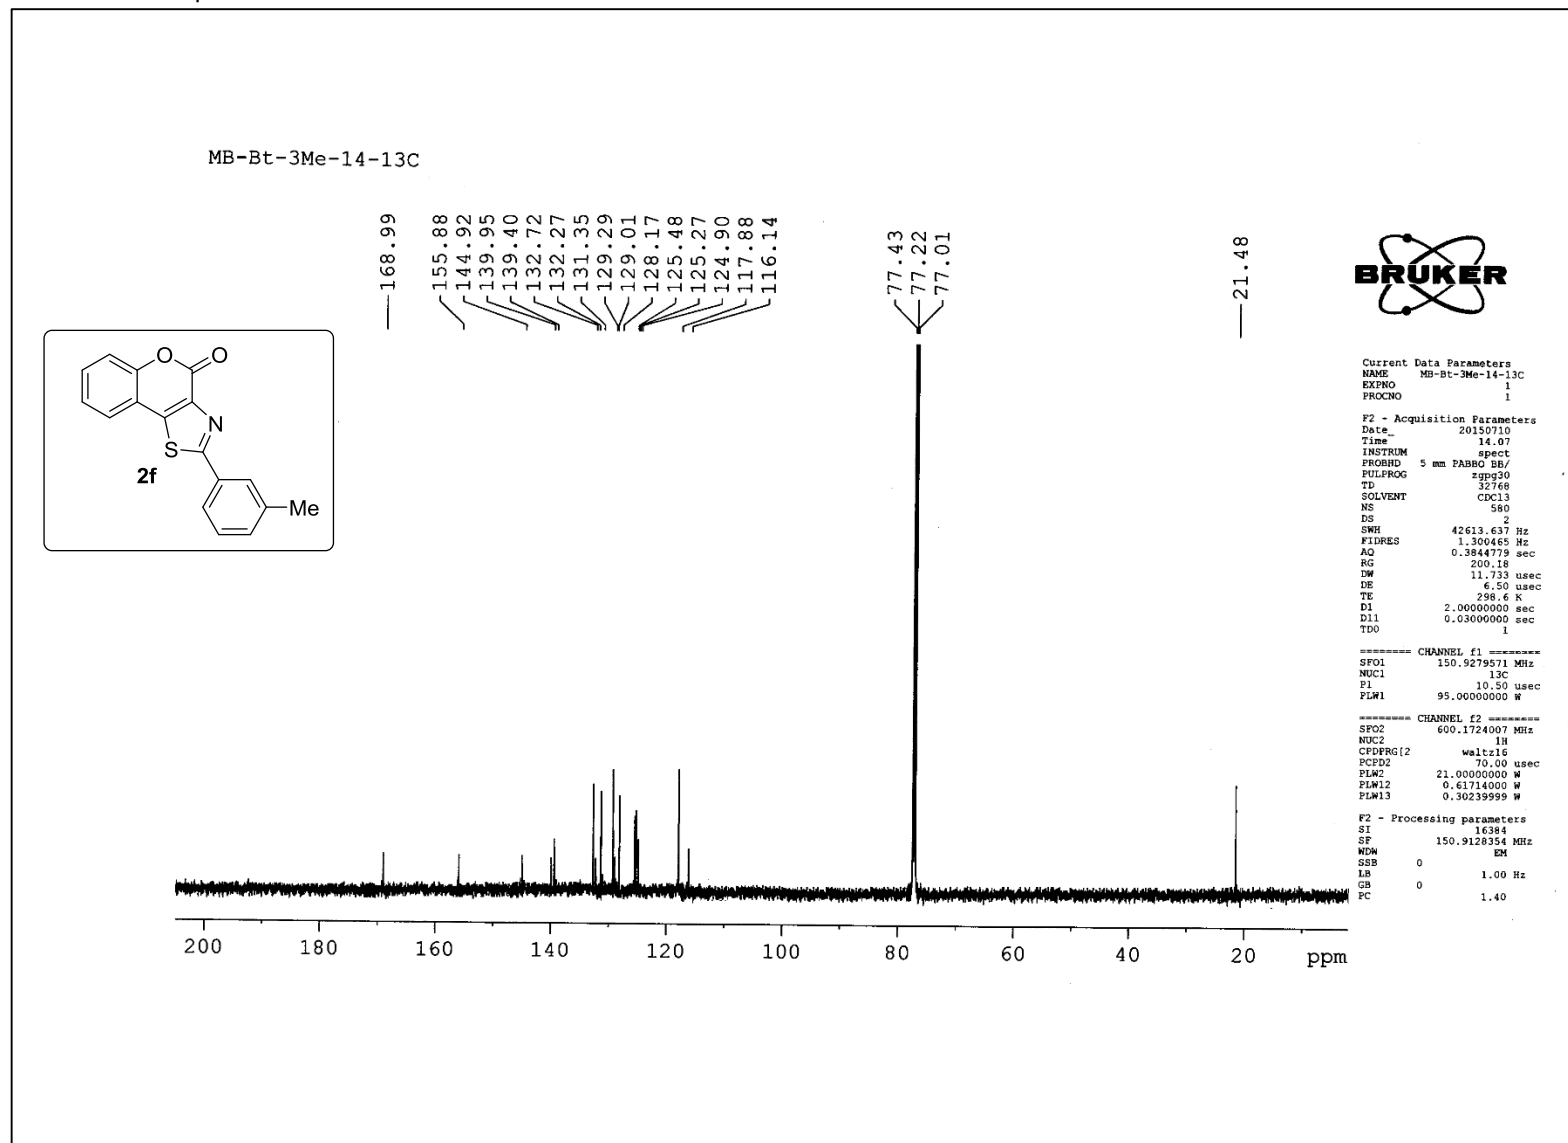

# HRMS Spectra of 2f

|                      |               |                    |             |                        |                                   |                               |             |
|----------------------|---------------|--------------------|-------------|------------------------|-----------------------------------|-------------------------------|-------------|
| <b>Sample Name</b>   | Unavailable   | <b>Position</b>    | Unavailable | <b>Instrument Name</b> | Unavailable                       | <b>User Name</b>              | Unavailable |
| <b>Inj Vol</b>       | Unavailable   | <b>InjPosition</b> | Unavailable | <b>SampleType</b>      | Unavailable                       | <b>IRM Calibration Status</b> | Success     |
| <b>Data Filename</b> | MB-Bt-18-14.d | <b>ACQ Method</b>  |             | <b>Comment</b>         | Sample information is unavailable | <b>Acquired Time</b>          | Unavailable |

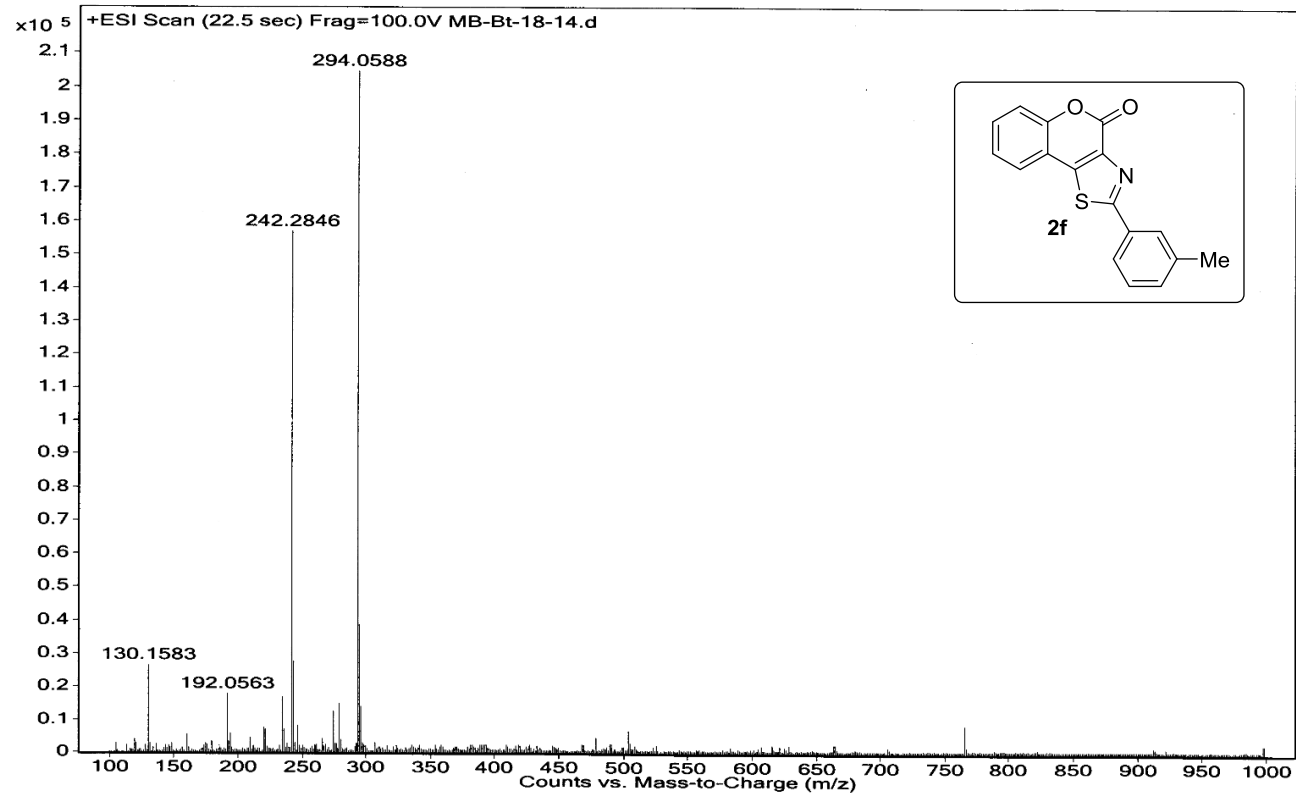

# <sup>1</sup>H NMR Spectra of **2g**

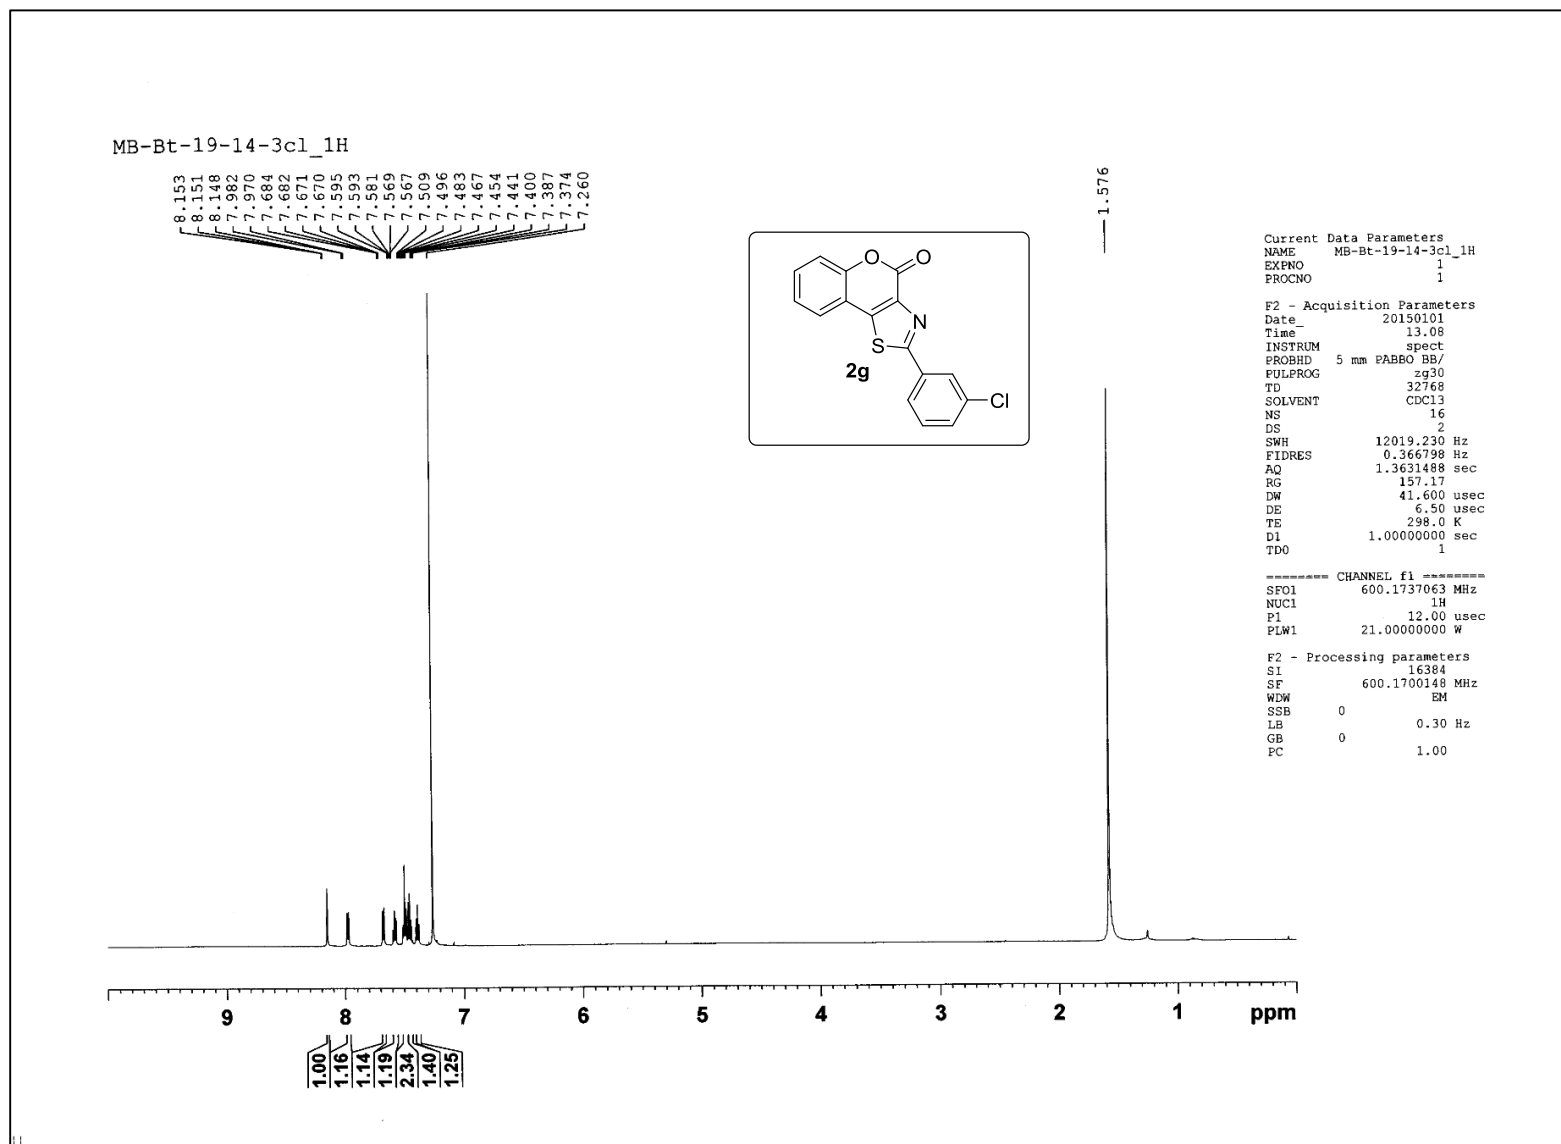

<sup>13</sup>C NMR spectra of **2g**

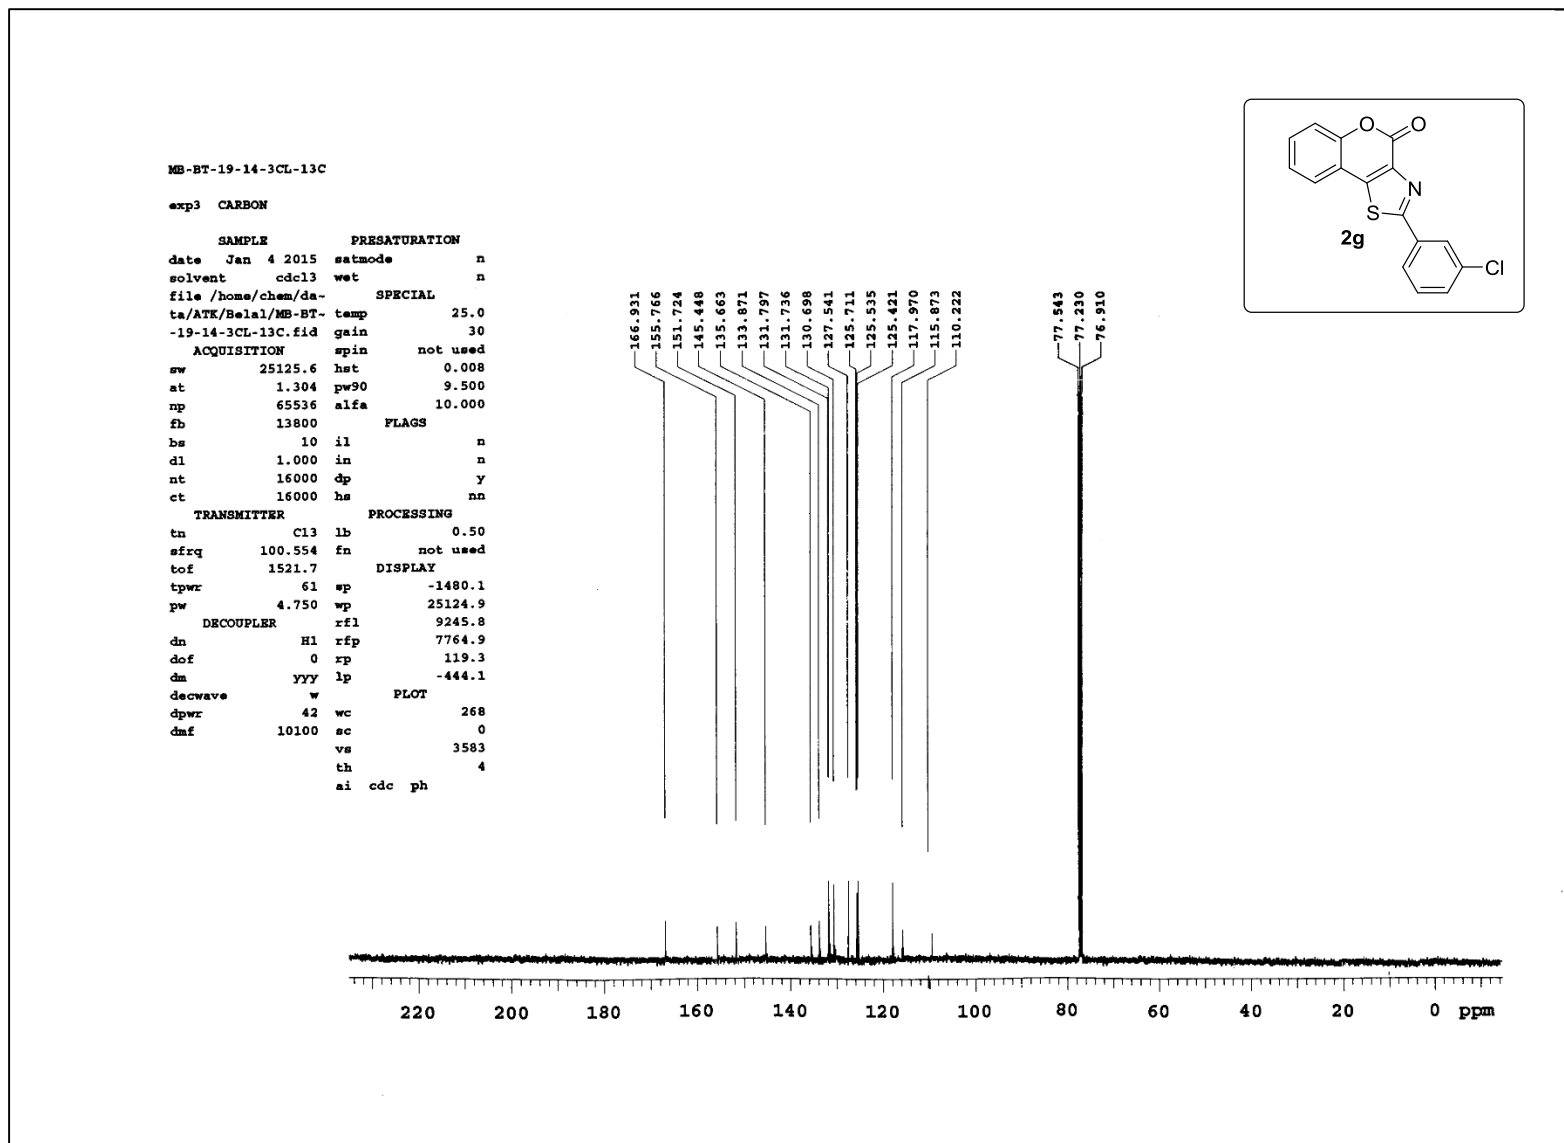

# HRMS Spectra of 2g

|                      |               |                    |        |                        |              |                               |                       |
|----------------------|---------------|--------------------|--------|------------------------|--------------|-------------------------------|-----------------------|
| <b>Sample Name</b>   | MB-Bt-19-14   | <b>Position</b>    | Vial 1 | <b>Instrument Name</b> | Instrument 1 | <b>User Name</b>              |                       |
| <b>Inj Vol</b>       | -10           | <b>InjPosition</b> |        | <b>SampleType</b>      | Sample       | <b>IRM Calibration Status</b> | Success               |
| <b>Data Filename</b> | MB-Bt-19-14.d | <b>ACQ Method</b>  |        | <b>Comment</b>         |              | <b>Acquired Time</b>          | 1/13/2015 11:03:24 AM |

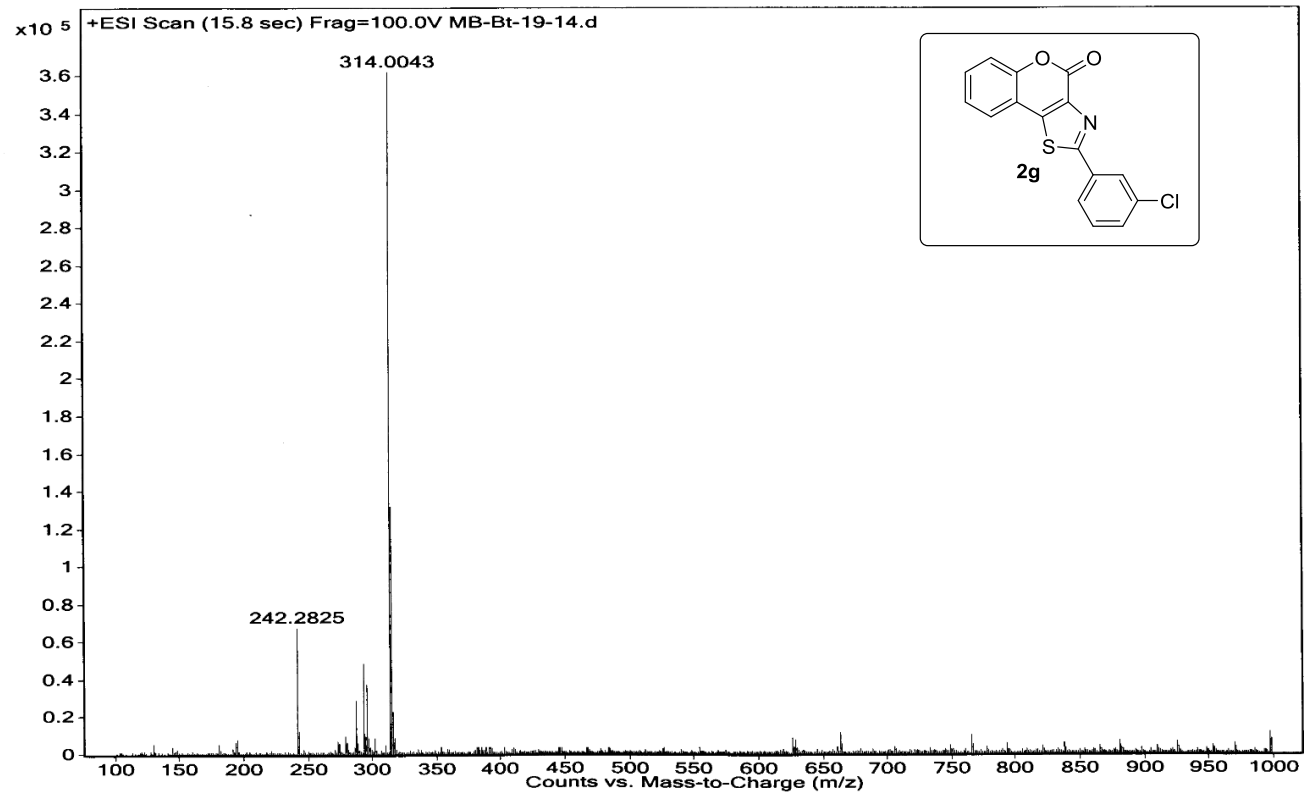

# <sup>1</sup>H NMR of 2h

MB-Bt-8-14-1H

Sample Name:  
MB-Bt-8-14-1H  
Data Collected on:  
IITG-NMR-mercury400  
Archive directory:  
/home/chem/data/study  
Sample directory:  
ALD-PPG-PR-5-01  
FidFile: MB-Bt-8-14-1H

Pulse Sequence: PROTON (s2pul)  
Solvent: cdcl3  
Data collected on: Mar 9 2014

Temp. 25.0 C / 298.1 K  
Operator: cham

Relax. delay 1.000 sec  
Pulse 45.0 degrees  
Acq. time 2.561 sec  
Width 6398.0 Hz  
64 repetitions  
OBSERVE H1, 399.8509634 MHz  
DATA PROCESSING  
FT size 32768  
Total time 4 min 24 sec

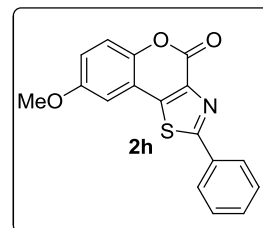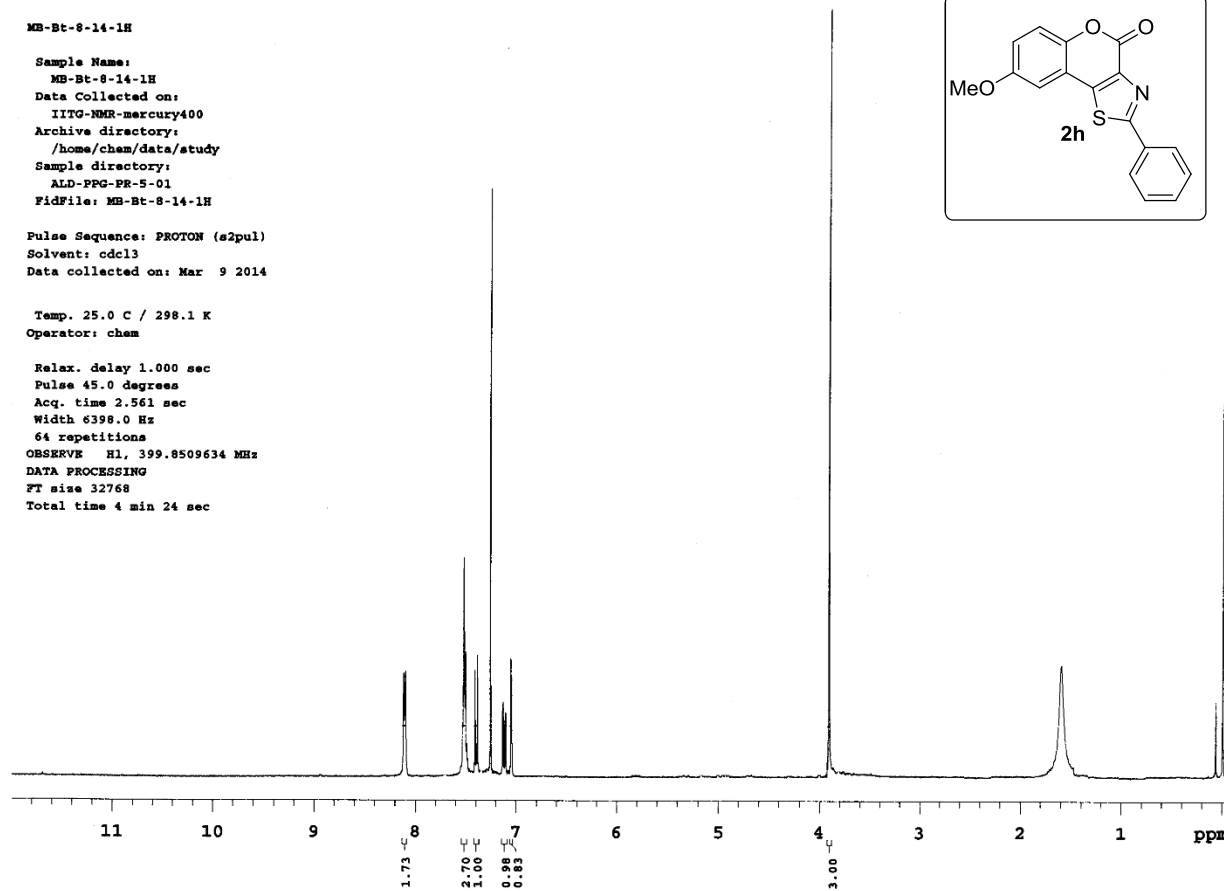

<sup>13</sup>C NMR of 2h

MB-Bt-8-14-13C

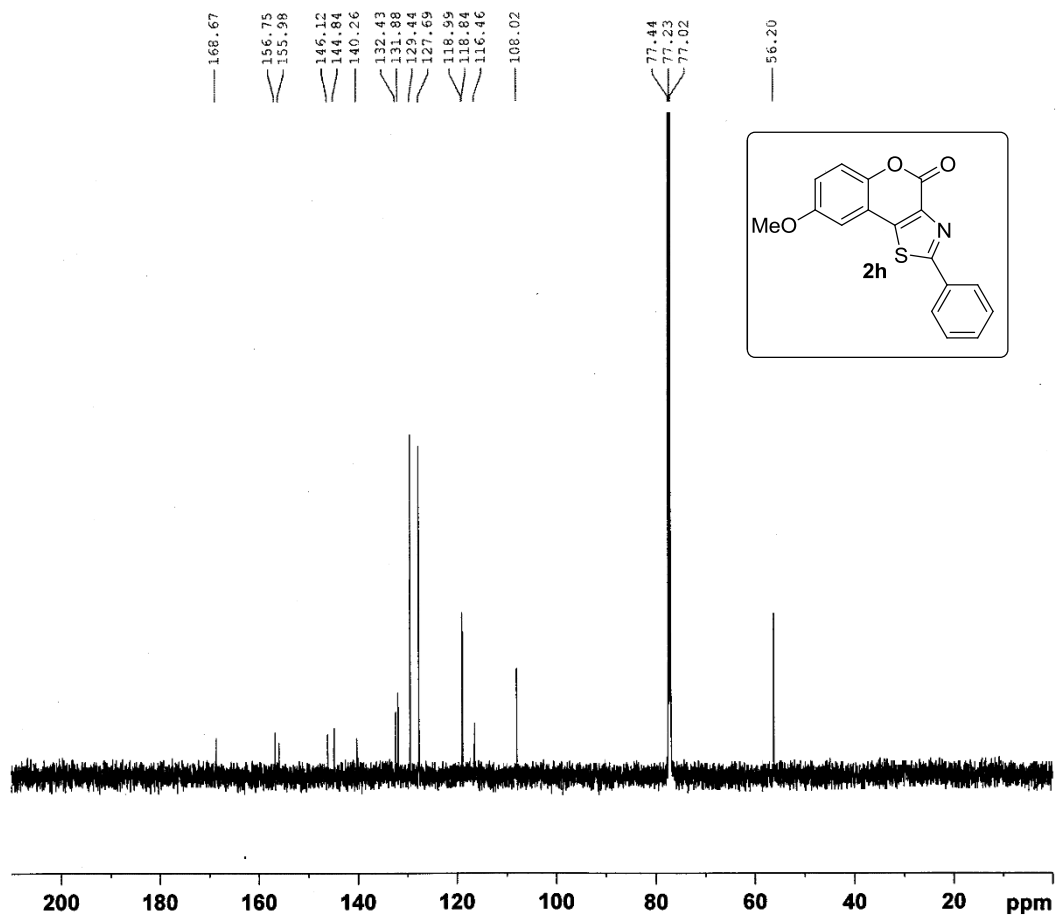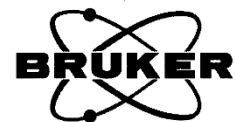

Current Data Parameters  
NAME MB-Bt-8-14-13C  
EXPNO 1  
PROCNO 1

F2 - Acquisition Parameters  
Date\_ 20140310  
Time\_ 10.23  
INSTRUM spect  
PROBHD 5 mm PABBO BB/  
PULPROG zgpg30  
TD 32768  
SOLVENT CDCl3  
NS 781  
DS 2  
SWH 36057.691 Hz  
FIDRES 1.100393 Hz  
AQ 0.4543829 sec  
RG 65.24  
DW 13.867 usec  
DE 6.50 usec  
TE 300.7 K  
D1 2.00000000 sec  
D11 0.03000000 sec  
TD0 1

===== CHANNEL f1 =====  
SFO1 150.9279571 MHz  
NUC1 13C  
P1 10.50 usec  
PLW1 95.00000000 W

===== CHANNEL f2 =====  
SFO2 600.1724007 MHz  
NUC2 1H  
CPDPRG[2] waltz16  
PCPD2 70.00 usec  
PLW2 21.00000000 W  
PLW12 0.61714000 W  
PLW13 0.30239999 W

F2 - Processing parameters  
SI 16384  
SF 150.9128328 MHz  
WDW EM  
SSB 0  
LB 1.00 Hz  
GB 0  
PC 1.40

# HRMS spectra of **2h**

|                      |              |                    |             |                        |                                   |                               |             |
|----------------------|--------------|--------------------|-------------|------------------------|-----------------------------------|-------------------------------|-------------|
| <b>Sample Name</b>   | Unavailable  | <b>Position</b>    | Unavailable | <b>Instrument Name</b> | Unavailable                       | <b>User Name</b>              | Unavailable |
| <b>Inj Vol</b>       | Unavailable  | <b>InjPosition</b> | Unavailable | <b>SampleType</b>      | Unavailable                       | <b>IRM Calibration Status</b> | Success     |
| <b>Data Filename</b> | MB-BT-8-14.d | <b>ACQ Method</b>  |             | <b>Comment</b>         | Sample information is unavailable | <b>Acquired Time</b>          | Unavailable |

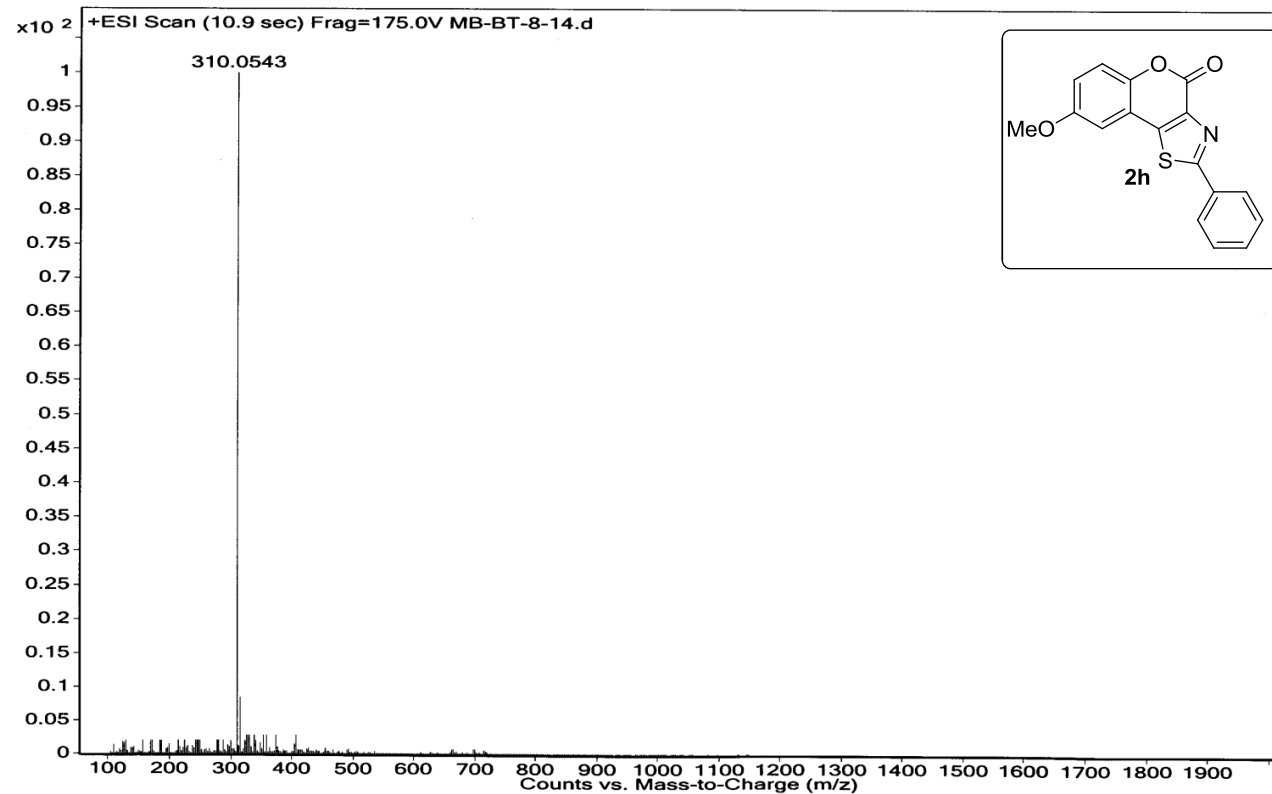



# <sup>1</sup>H NMR spectra of **2i**

MB-Bt-9-14-1H

Sample Name:

MB-Bt-9-14-1H

Data Collected on:

IITG-NMR-mercury400

Archive directory:

Sample directory:

FidFile: PROTON

Pulse Sequence: PROTON (s2pul)

Solvent: cdcl3

Data collected on: Mar 15 2014

Temp. 25.0 C / 298.1 K

Operator: chem

Relax. delay 1.000 sec

Pulse 45.0 degrees

Acq. time 2.561 sec

Width 6398.0 Hz

32 repetitions

OBSERVE H1, 399.8509634 MHz

DATA PROCESSING

FT size 32768

Total time 2 min 12 sec

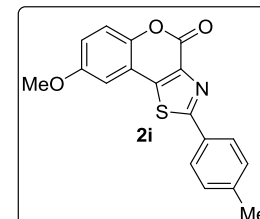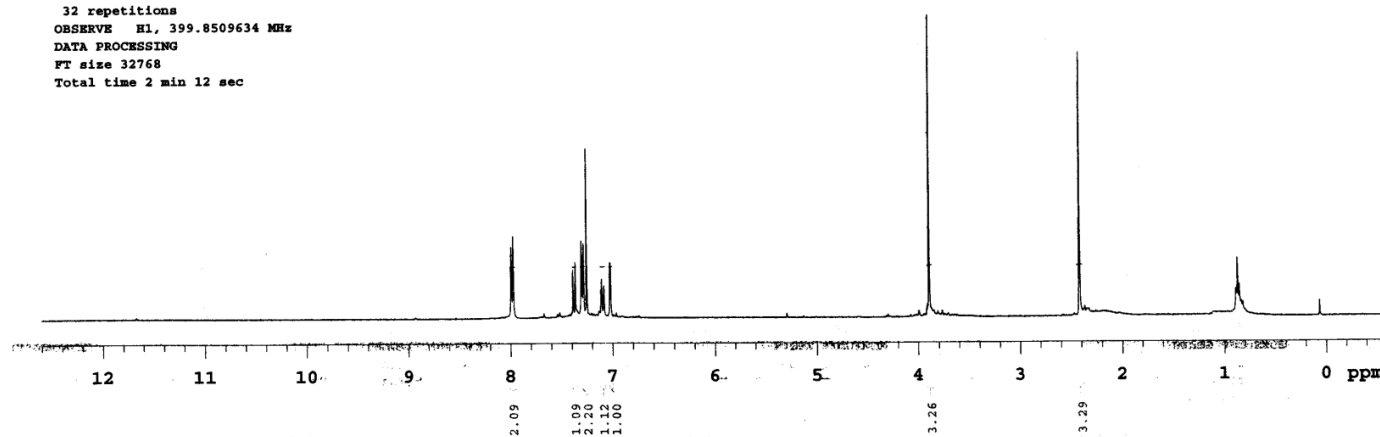

<sup>13</sup>C NMR spectra of **2i**

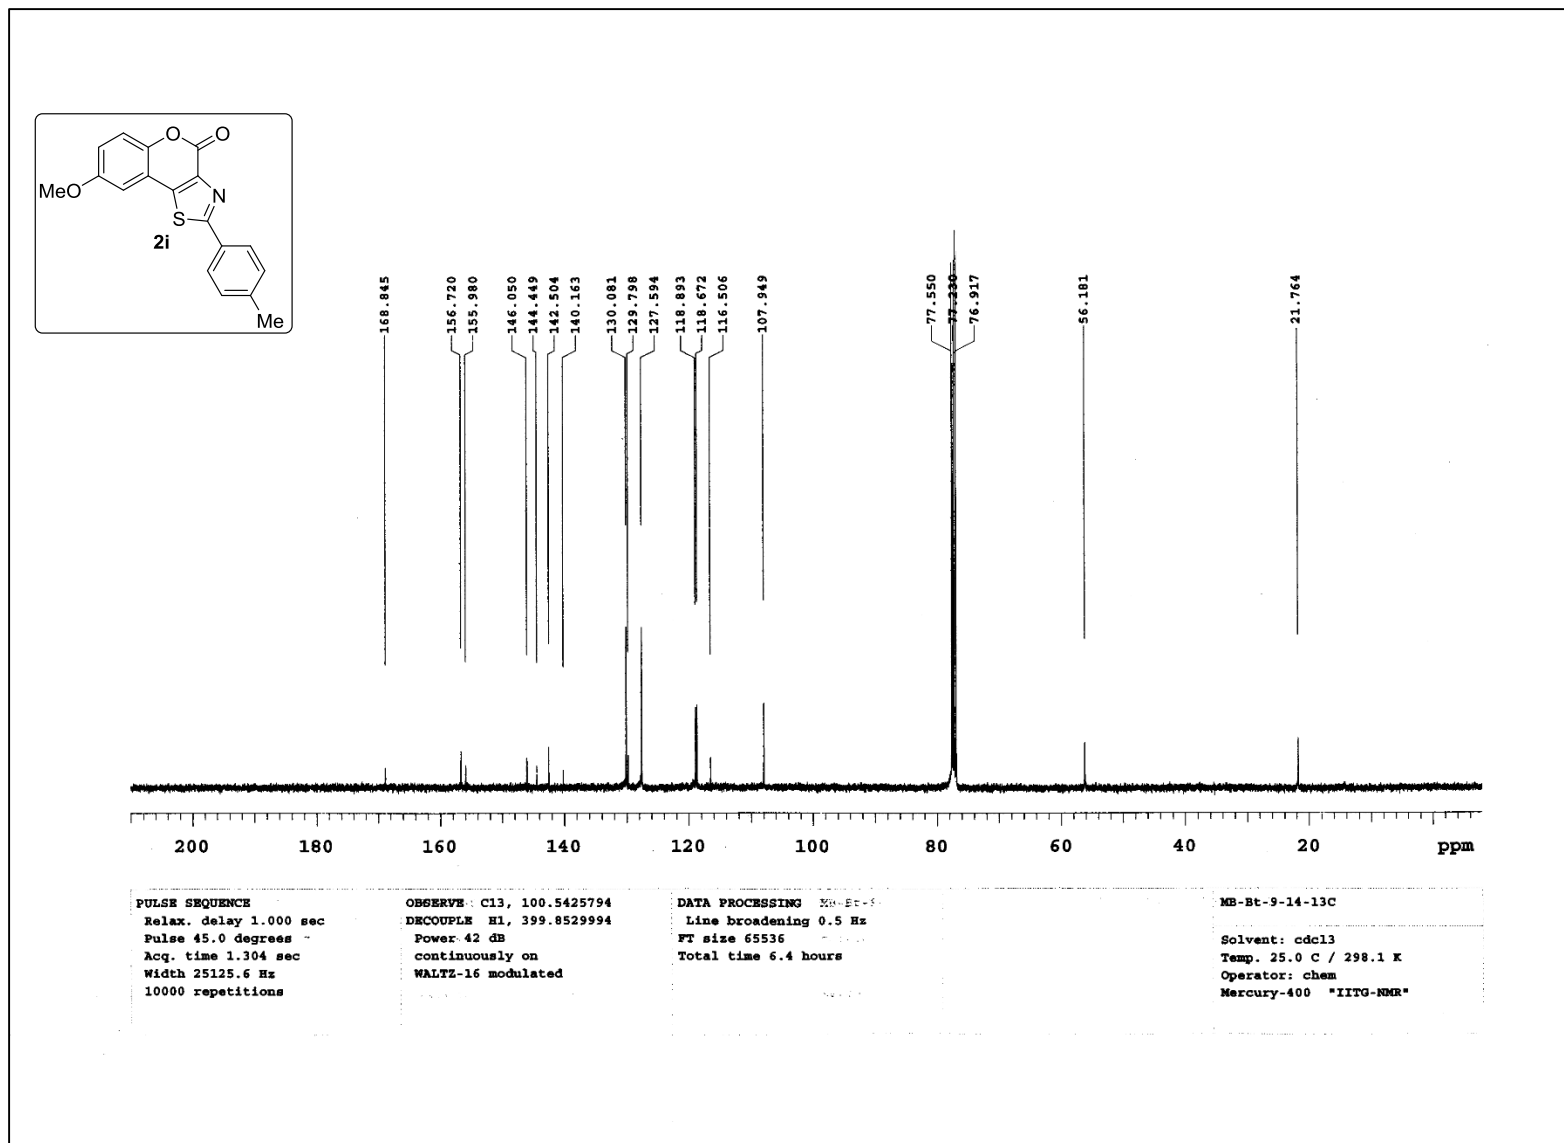

# HRMS spectra of **2i**

|                      |              |                    |             |                        |                                   |                               |             |
|----------------------|--------------|--------------------|-------------|------------------------|-----------------------------------|-------------------------------|-------------|
| <b>Sample Name</b>   | Unavailable  | <b>Position</b>    | Unavailable | <b>Instrument Name</b> | Unavailable                       | <b>User Name</b>              | Unavailable |
| <b>Inj Vol</b>       | Unavailable  | <b>InjPosition</b> | Unavailable | <b>SampleType</b>      | Unavailable                       | <b>IRM Calibration Status</b> | Success     |
| <b>Data Filename</b> | MB-BT-9-14.d | <b>ACQ Method</b>  |             | <b>Comment</b>         | Sample information is unavailable | <b>Acquired Time</b>          | Unavailable |

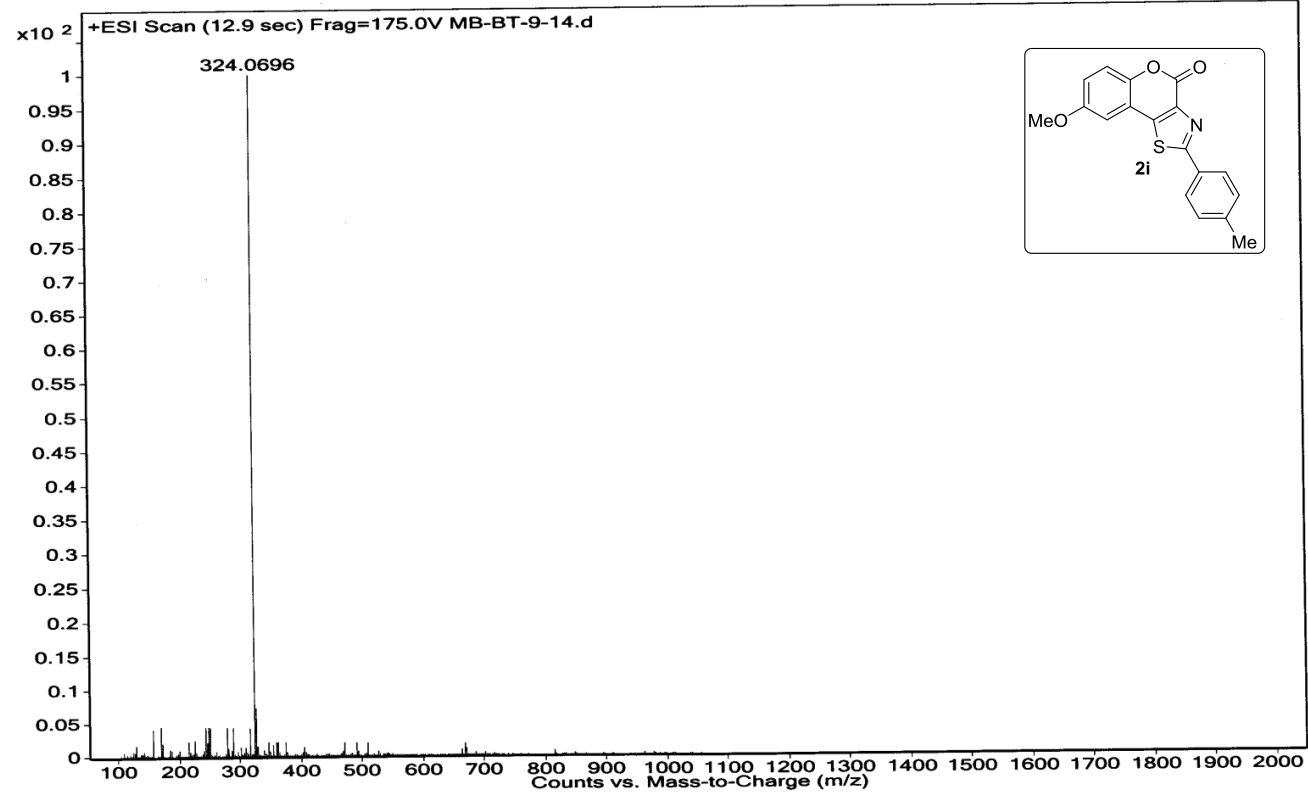

# <sup>1</sup>H NMR spectra of **2j**

MB-Bt-12-14-1H

Sample Name:

MB-Bt-12-14-1H

Data Collected on:

IITG-NMR-mercury400

Archive directory:

/export/home/chempack/vnmrsvs/data

Sample directory:

FidFile: PROTON

Pulse Sequence: PROTON (s2pul)

Solvent: cdcl3

Data collected on: Mar 23 2014

Temp. 25.0 C / 298.1 K

Operator: chem

Relax. delay 1.000 sec

Pulse 45.0 degrees

Acq. time 2.561 sec

Width 6398.0 Hz

32 repetitions

OBSERVE H1, 399.8509634 MHz

DATA PROCESSING

FT size 32768

Total time 2 min 12 sec

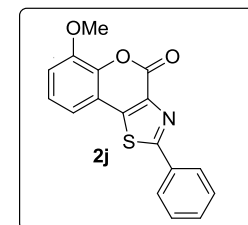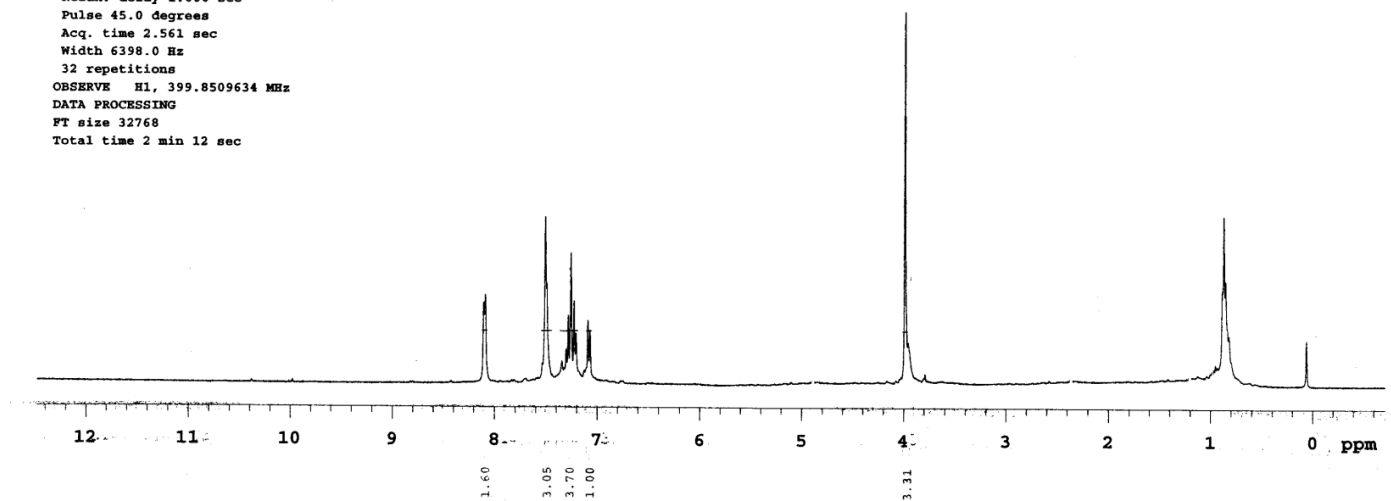

<sup>13</sup>C NMR spectra of 2j

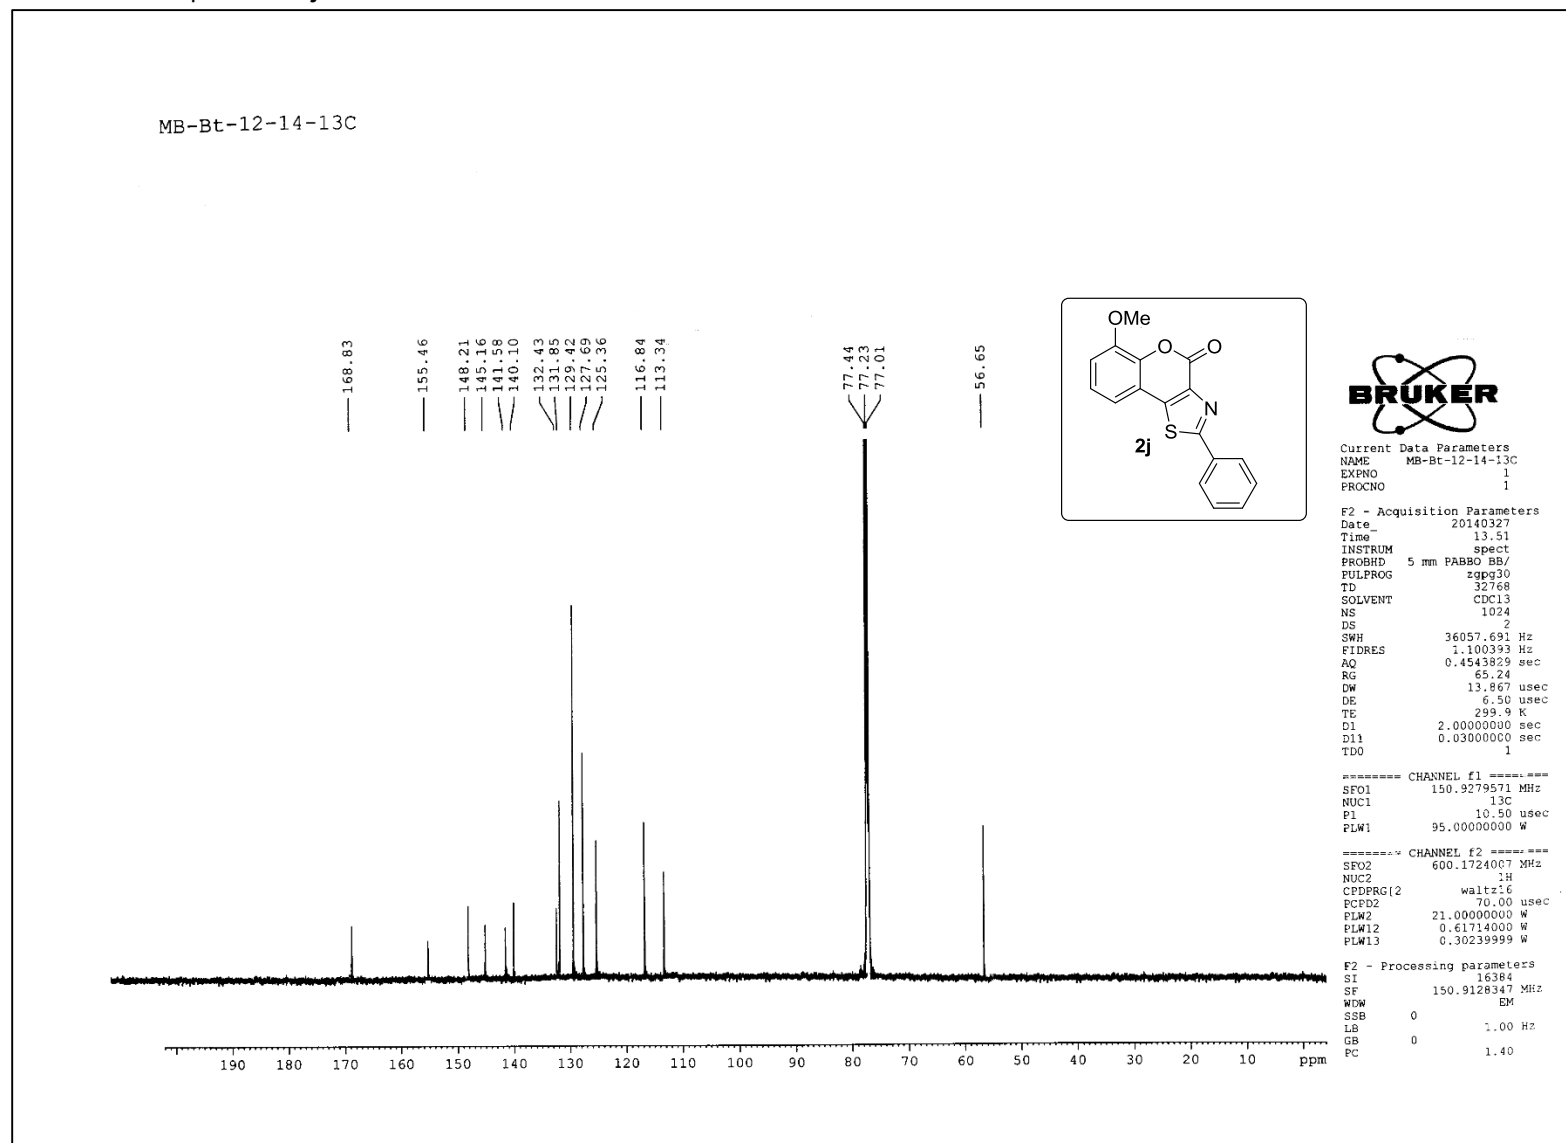

HRMS spectra of **2j**

|               |               |             |    |                 |              |                        |                      |
|---------------|---------------|-------------|----|-----------------|--------------|------------------------|----------------------|
| Sample Name   | MB-BT-12-14   | Position    | -1 | Instrument Name | Instrument 1 | User Name              |                      |
| Inj Vol       | -10           | InjPosition |    | SampleType      | Sample       | IRM Calibration Status | Success              |
| Data Filename | MB-BT-12-14.d | ACQ Method  |    | Comment         |              | Acquired Time          | 5/13/2014 3:40:30 PM |

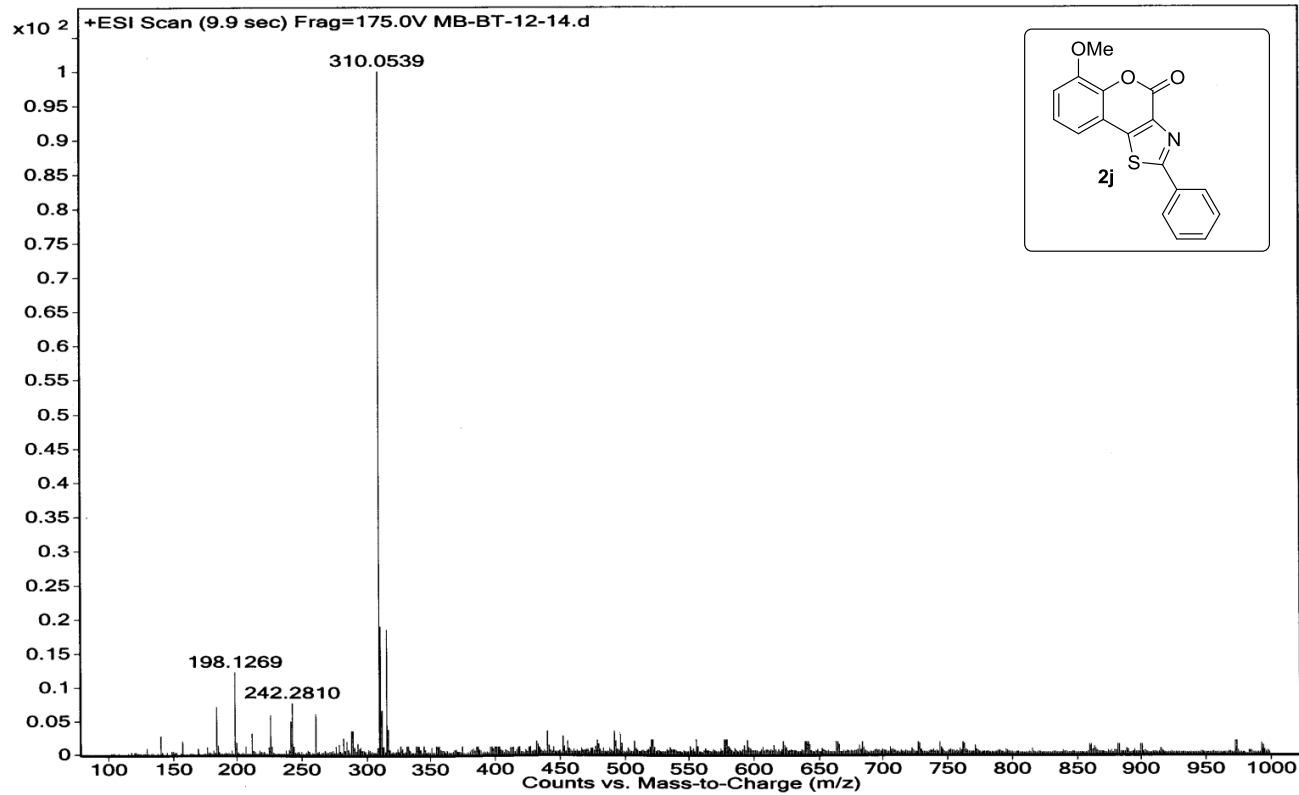

# H<sup>1</sup> NMR spectra of **2k**

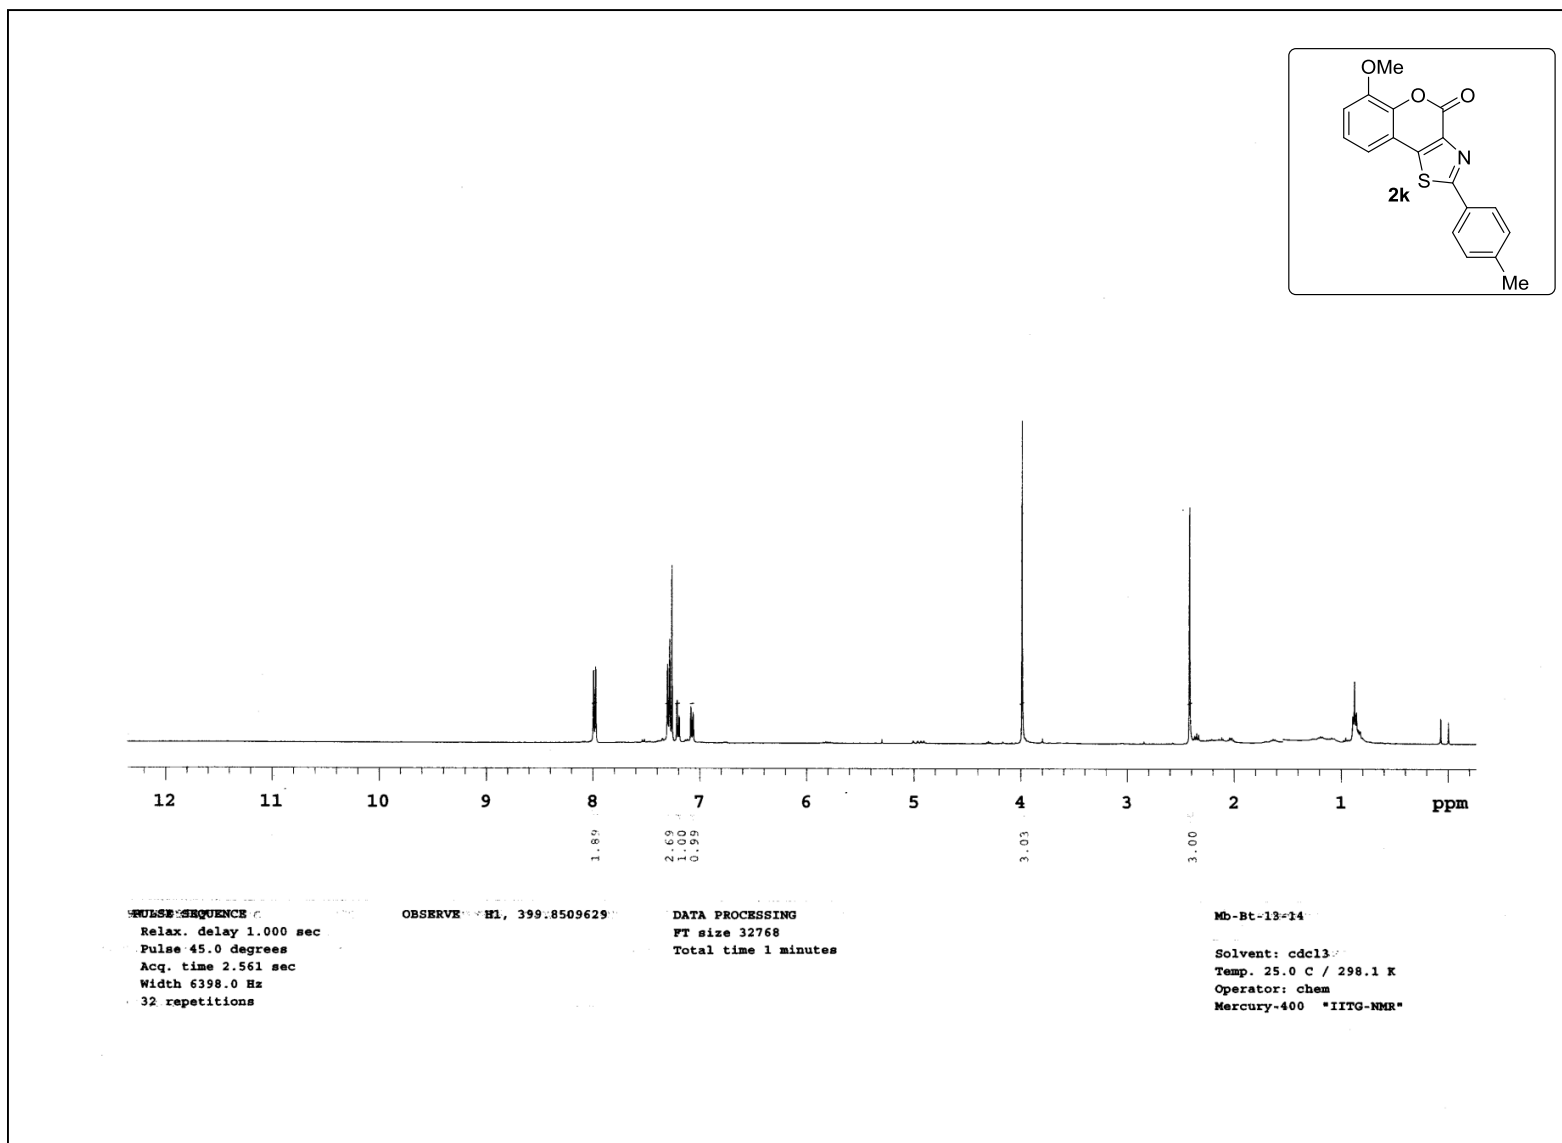

<sup>13</sup>C NMR spectra of **2k**

MB-BT-13-14\_13C

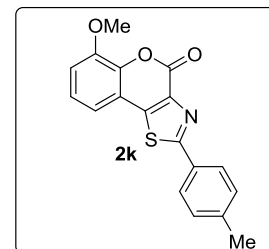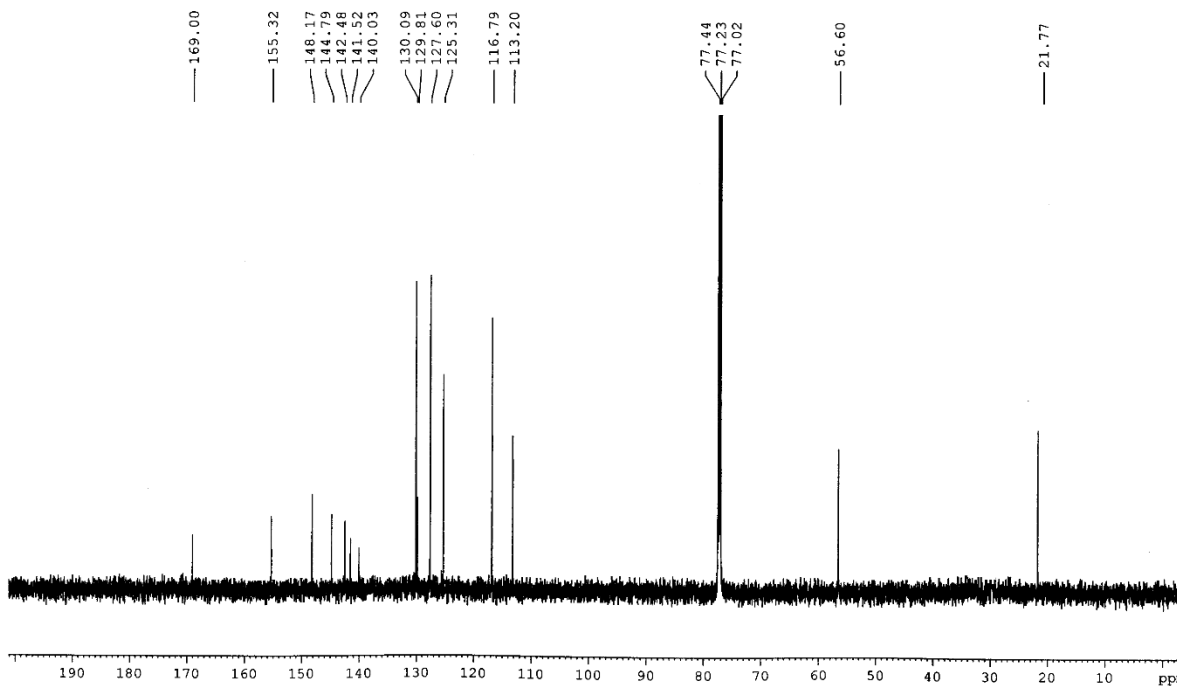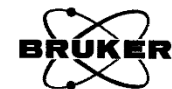

Current Data Parameters  
NAME MB-BT-13-14\_13C  
EXPNO 1  
PROCNO 1

F2 - Acquisition Parameters  
Date\_ 20140325  
Time 18.43  
INSTRUM spect  
PROBHD 5 mm PABBO RB/  
PULPROG zgpg30  
TD 32768  
SOLVENT CDCl3  
NS 727  
DS 2  
SWH 36057.691 Hz  
FIDRES 1.100393 Hz  
AQ 0.4543829 sec  
RG 65.24  
DW 13.867 usec  
DE 6.50 usec  
TE 300.5 K  
D1 2.0000000 sec  
D11 0.0300000 sec  
TD0 1

===== CHANNEL f1 =====  
SFO1 150.9279571 MHz  
NUC1 13C  
P1 10.50 usec  
PLW1 95.00000000 W

===== CHANNEL f2 =====  
SFO2 600.1724007 MHz  
NUC2 1H  
CPDPRG2 waltz16  
PCPD2 70.00 usec  
PLW2 21.00000000 W  
PLW12 0.63714000 W  
PLW13 0.30239999 W

F2 - Processing parameters  
SI 16384  
SF 150.9128332 MHz  
WDW EM  
SSB 0  
LB 1.00 Hz  
GB 0  
PC 1.40



# HRMS spectra of 2k

|                      |               |                    |    |                        |              |                               |                      |
|----------------------|---------------|--------------------|----|------------------------|--------------|-------------------------------|----------------------|
| <b>Sample Name</b>   | MB-BT-13-14   | <b>Position</b>    | -1 | <b>Instrument Name</b> | Instrument 1 | <b>User Name</b>              |                      |
| <b>Inj Vol</b>       | -10           | <b>InjPosition</b> |    | <b>SampleType</b>      | Sample       | <b>IRM Calibration Status</b> | Success              |
| <b>Data Filename</b> | MB-BT-13-14.d | <b>ACQ Method</b>  |    | <b>Comment</b>         |              | <b>Acquired Time</b>          | 5/13/2014 3:35:40 PM |

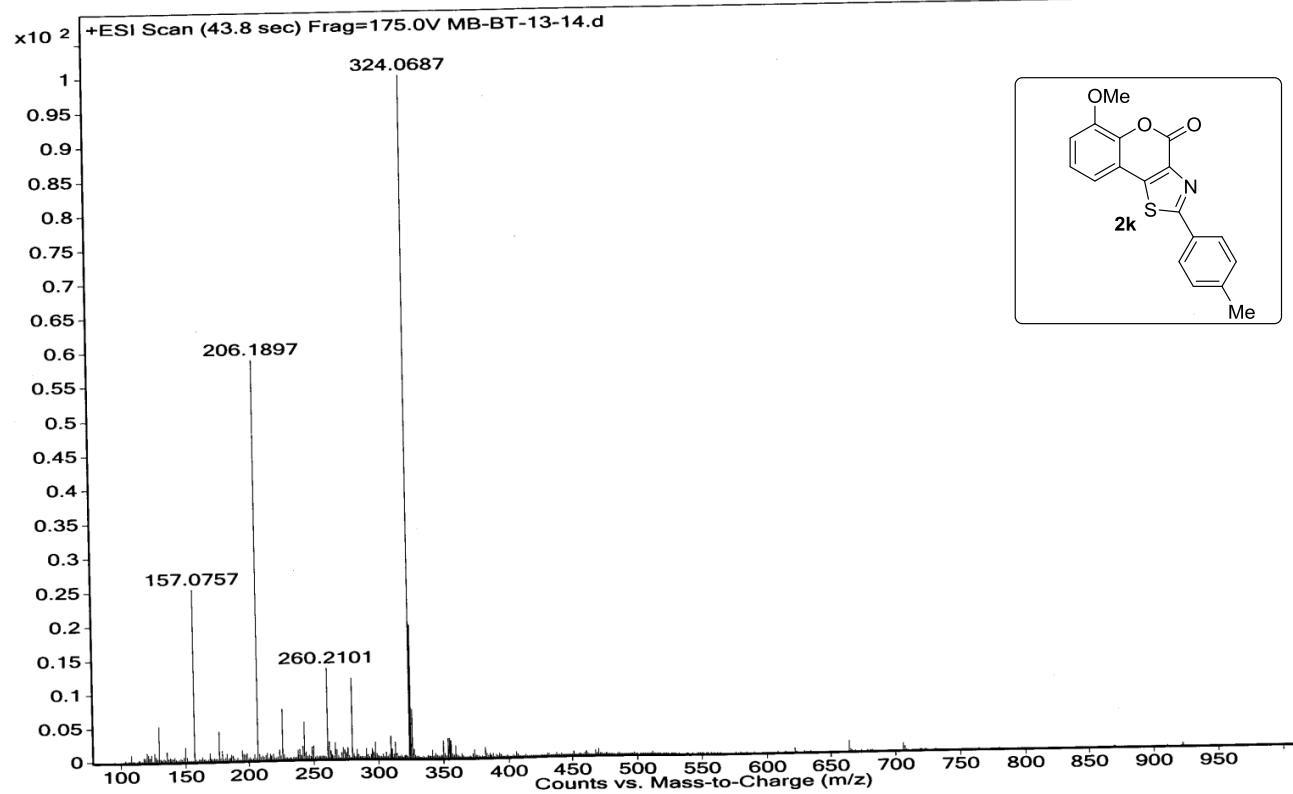

# <sup>1</sup>H NMR spectra of **2l**

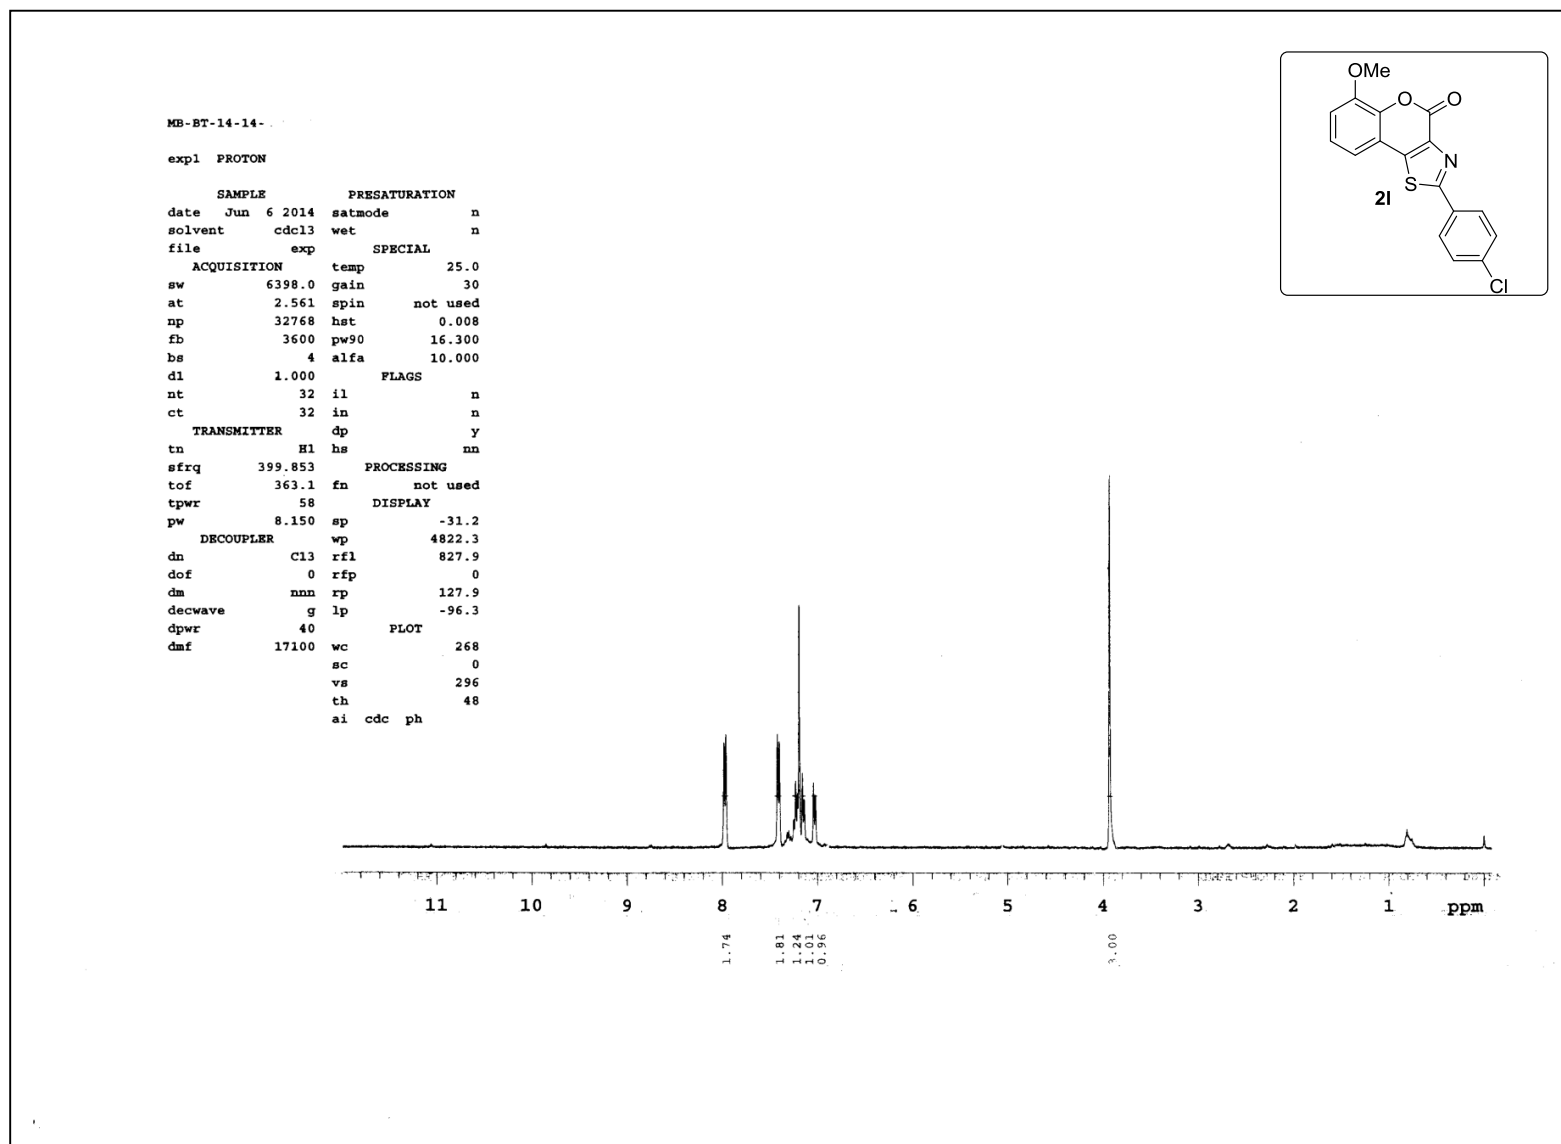

<sup>13</sup>C NMR spectra of **21**

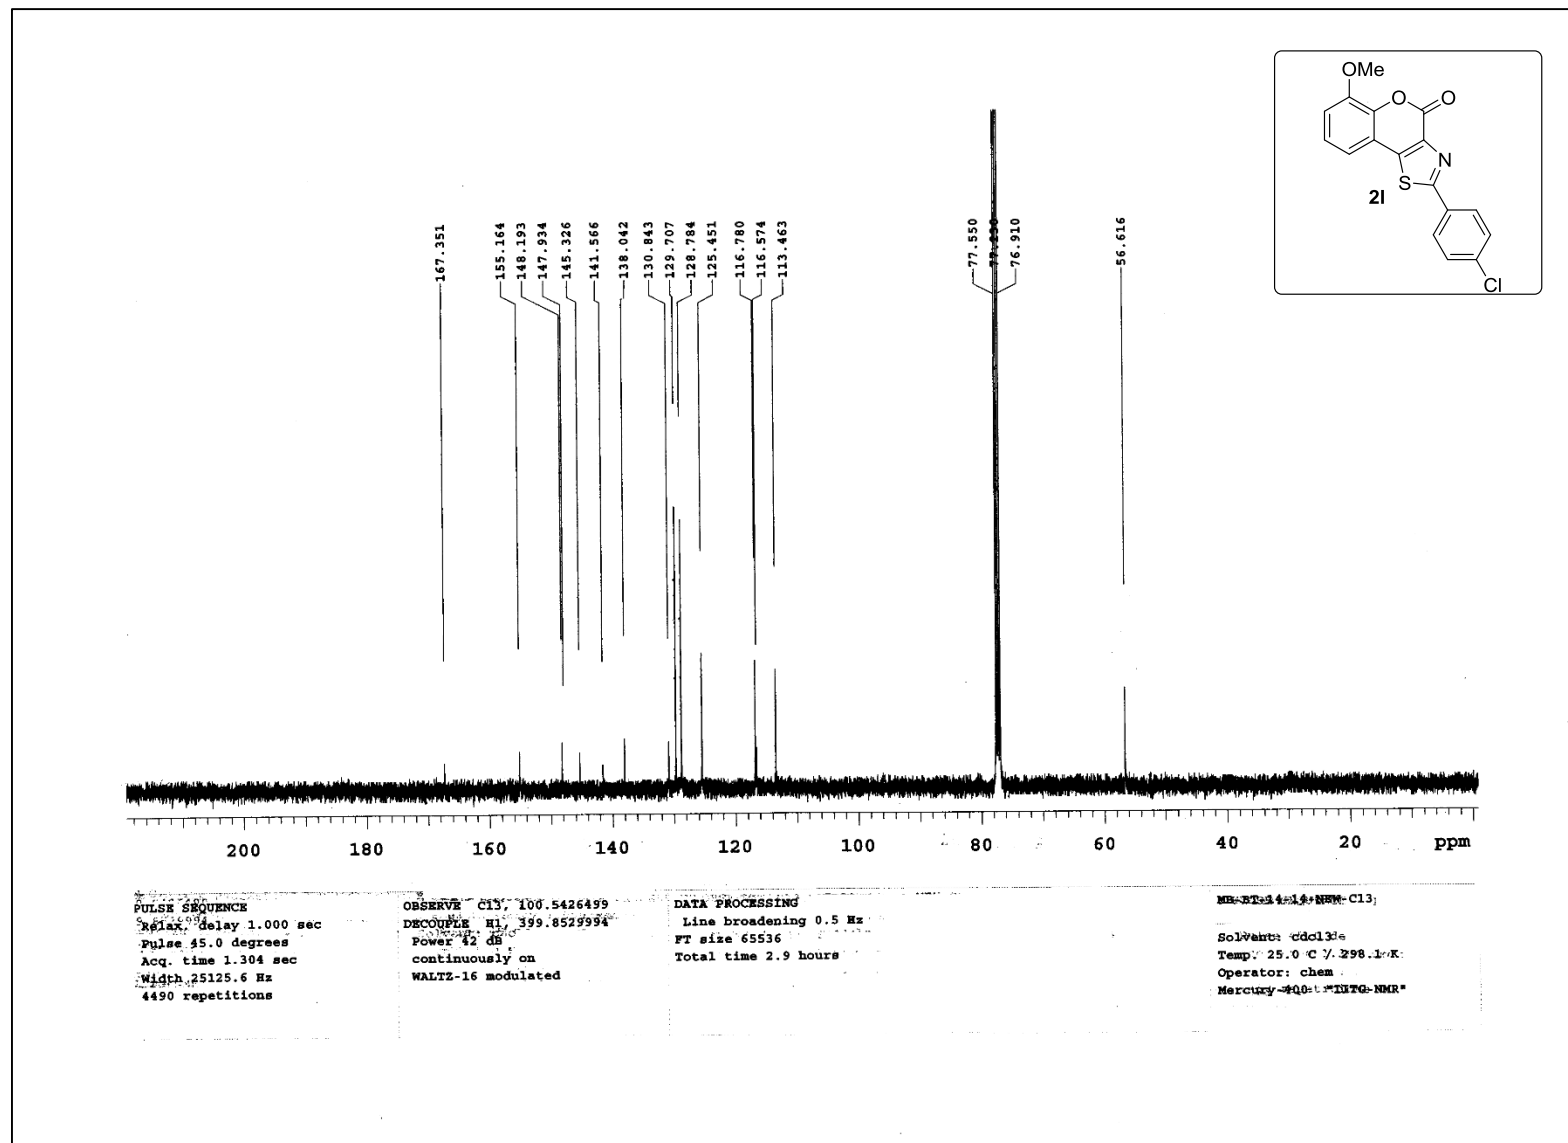

# HRMS spectra of **2l**

Sample Name  
Inj Vol  
Data Filename

Position  
InjPosition  
ACQ Method

Instrument Name  
SampleType  
Comment

User Name  
IRM Calibration Status  
Acquired Time

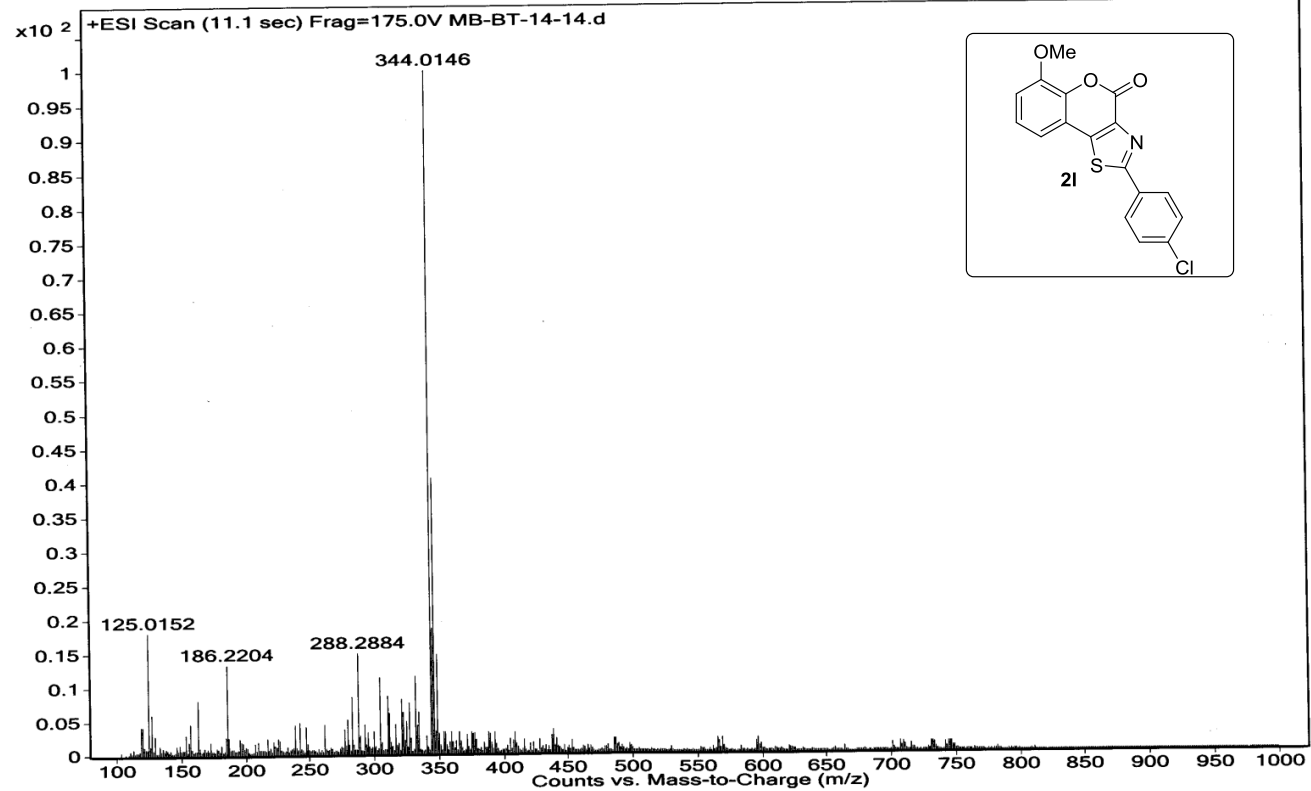

# $H^1$ NMR spectra of **2m**

MB-BT-3-14-1H

Sample Name:

MB-BT-3-14-1H

Data Collected on:

ITQ-NMR-mercury400

Archive directory:

/export/home/chempack/vnmrsys/data

Sample directory:

FidFile: PROTON

Pulse Sequence: PROTON (s2pul)

Solvent: cdcl3

Data collected on: Mar 1 2014

Temp. 25.0 C / 298.1 K

Operator: chem

Relax. delay 1.000 sec

Pulse 45.0 degrees

Acq. time 2.561 sec

Width 6398.0 Hz

76 repetitions

OBSERVE H1, 399.8509634 MHz

DATA PROCESSING

FT size 32768

Total time 13 min

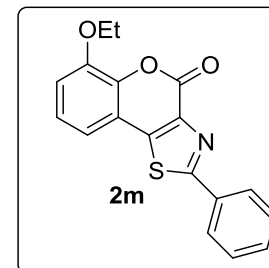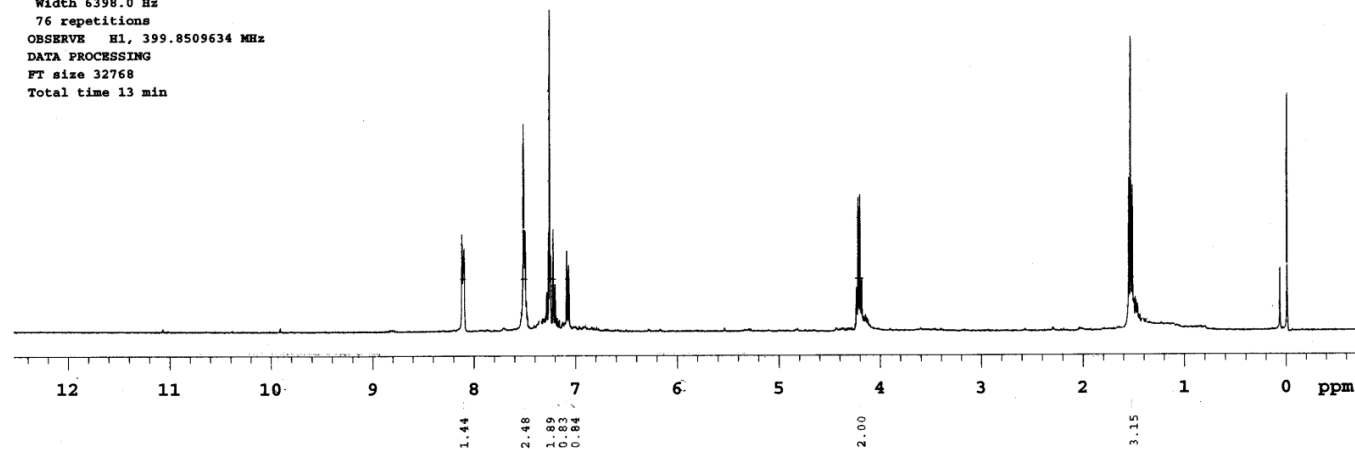

<sup>13</sup>C NMR spectra of **2m**

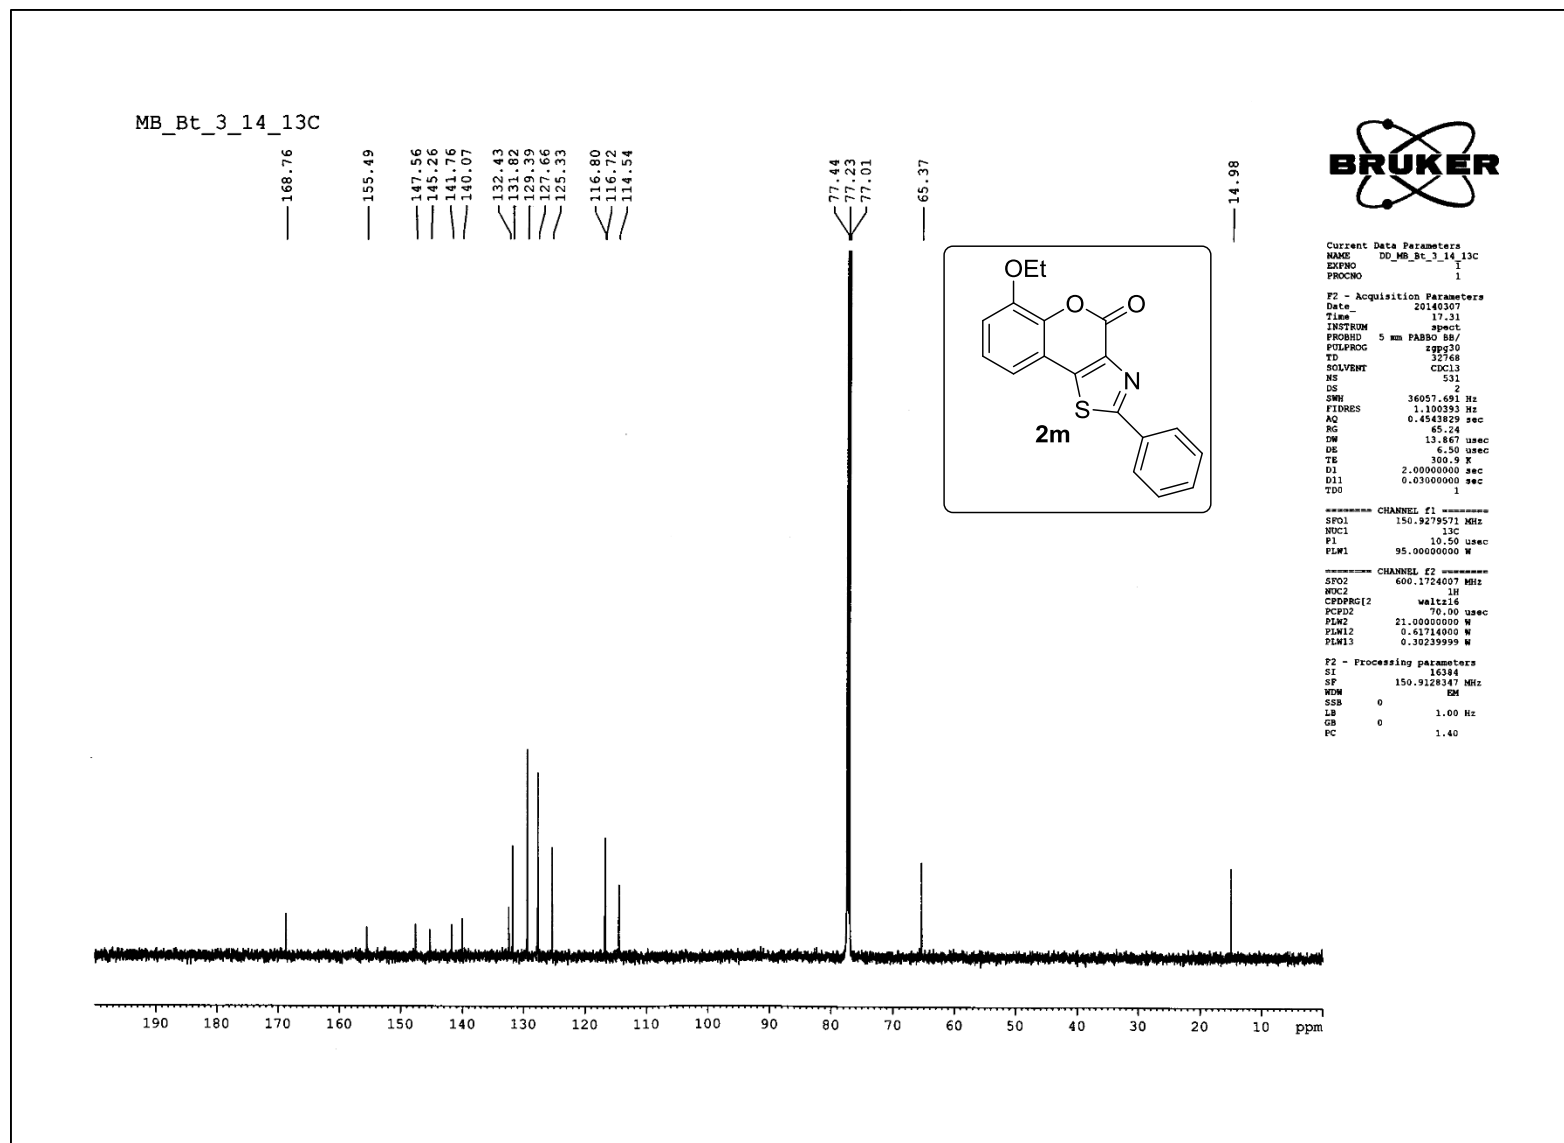

HRMS spectra of **2m**

|                      |              |                    |    |                        |              |                               |                     |
|----------------------|--------------|--------------------|----|------------------------|--------------|-------------------------------|---------------------|
| <b>Sample Name</b>   | MB-BT-3-14   | <b>Position</b>    | -1 | <b>Instrument Name</b> | Instrument 1 | <b>User Name</b>              |                     |
| <b>Inj Vol</b>       | -10          | <b>InjPosition</b> |    | <b>SampleType</b>      | Sample       | <b>IRM Calibration Status</b> | Success             |
| <b>Data Filename</b> | MB-BT-3-14.d | <b>ACQ Method</b>  |    | <b>Comment</b>         |              | <b>Acquired Time</b>          | 5/6/2014 2:49:30 PM |

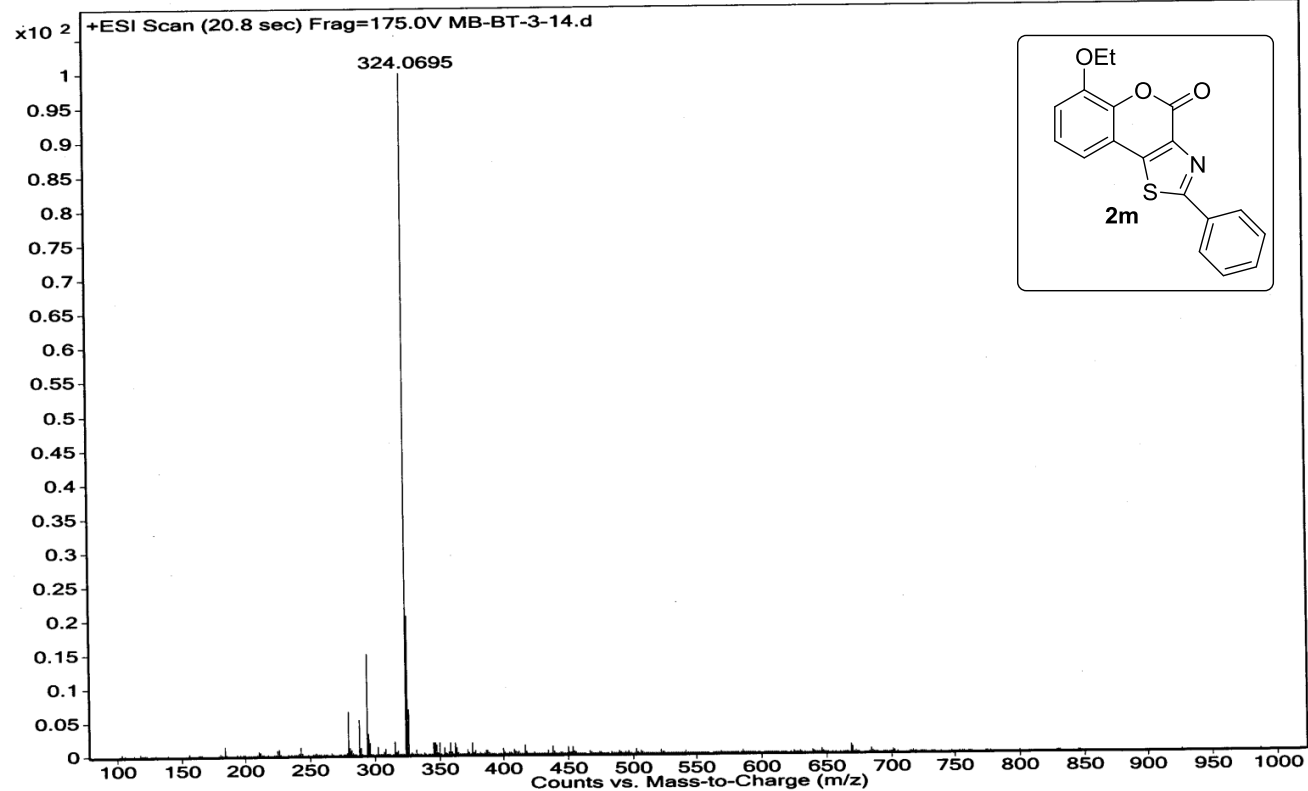

<sup>1</sup>H NMR spectra of **2n**

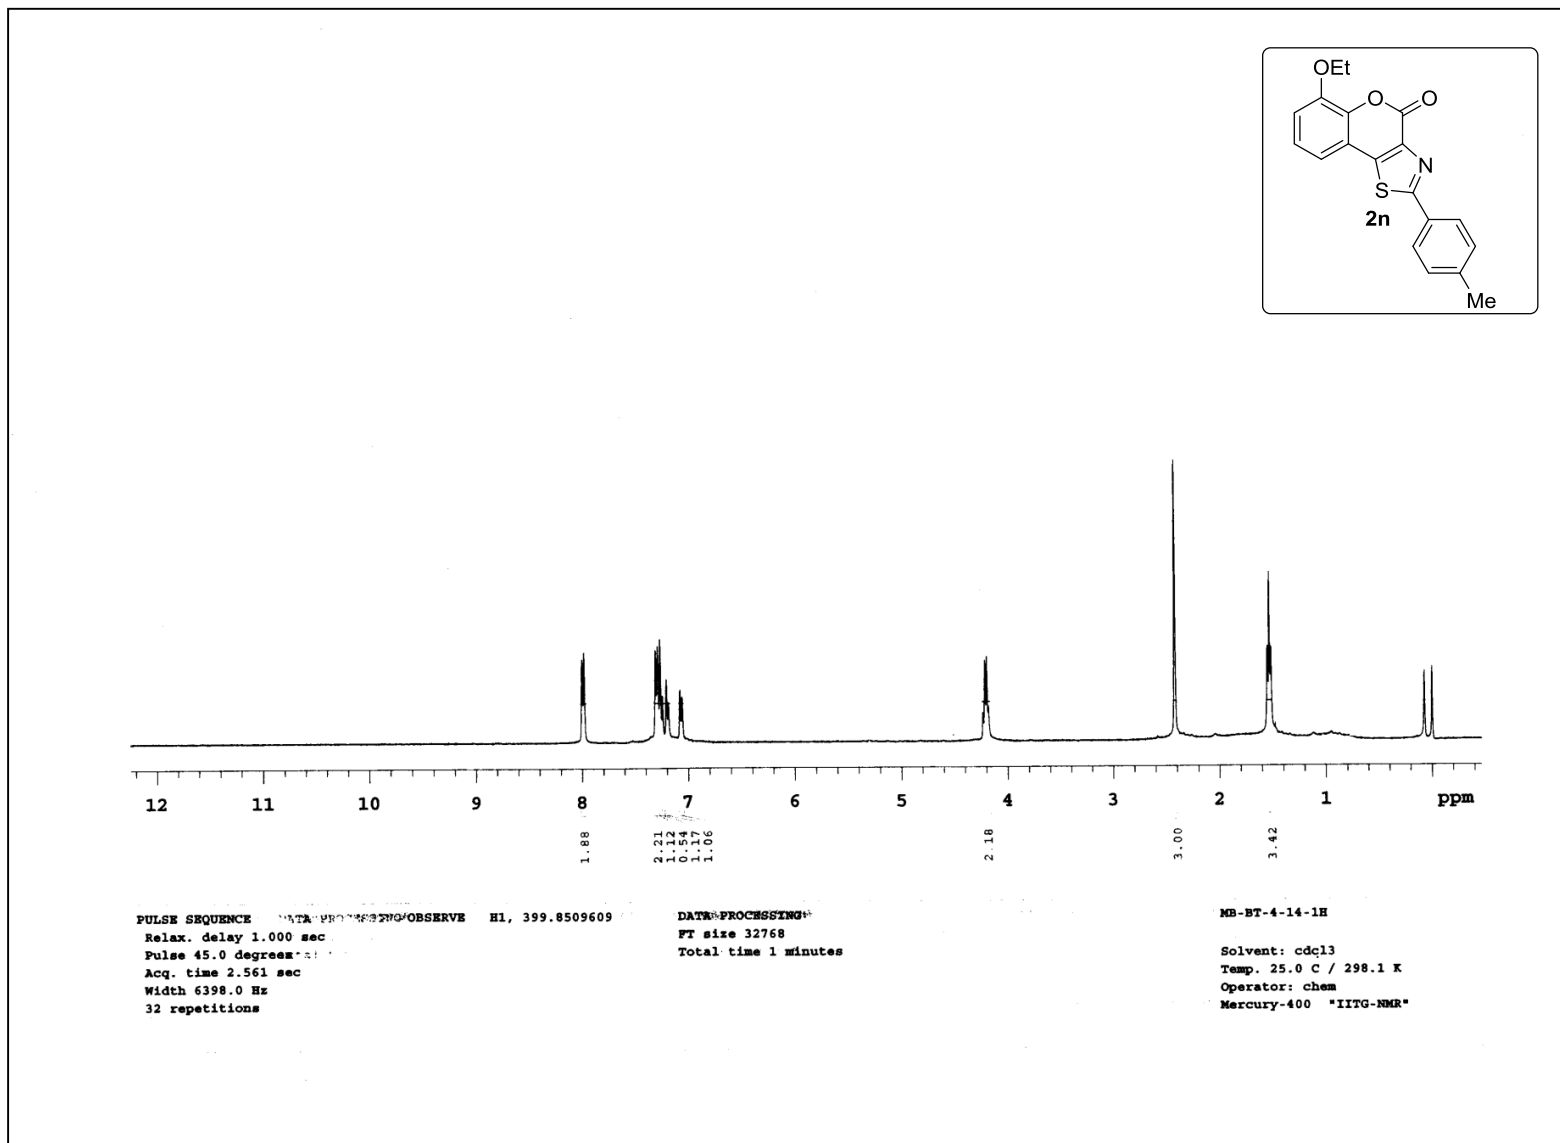



<sup>13</sup>C NMR spectra of 2n

MB-BT-4-14-13C

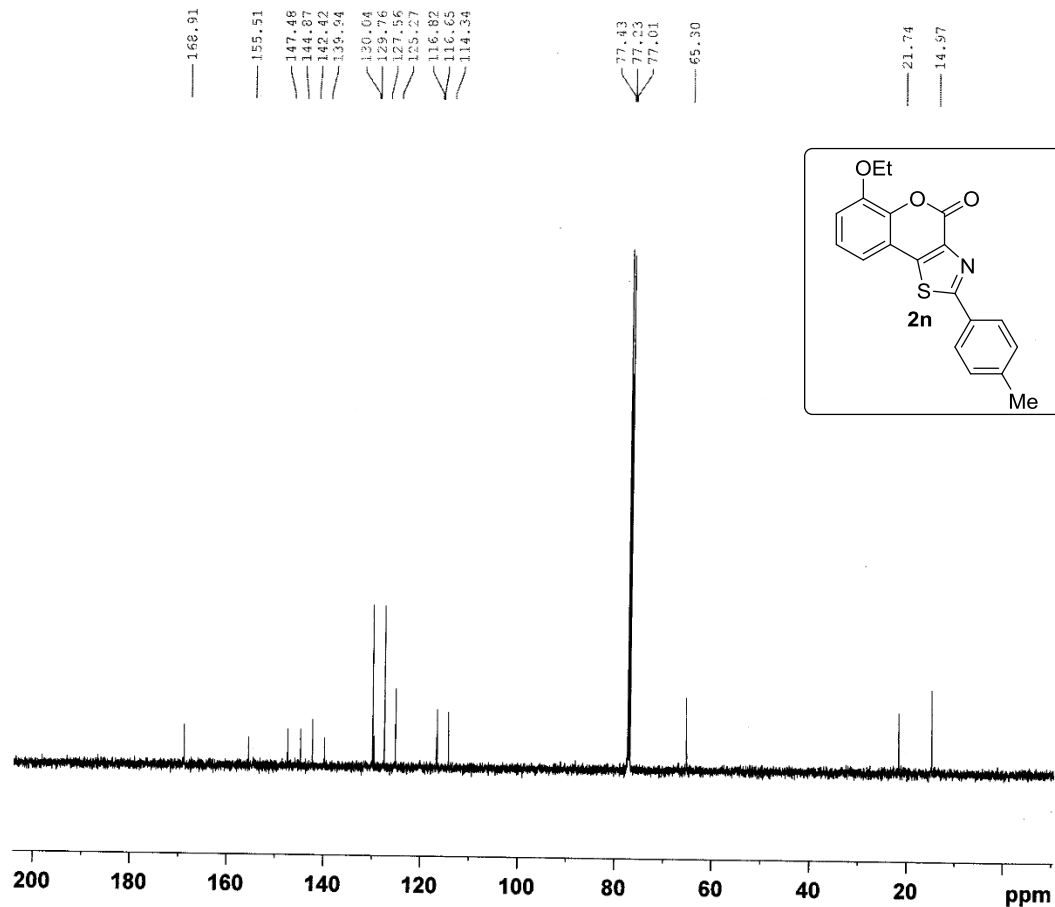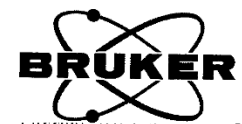

Current Data Parameters  
NAME MB-BT-4-14-13C  
EXPNO 1  
PROCNO 1

F2 - Acquisition Parameters  
Date\_ 20140307  
Time 10.15  
INSTRUM spect  
PROBHD 5 mm PABBO BB/  
PULPROG zgpg30  
TD 32768  
SOLVENT CDCl3  
NS 96  
DS 2  
SWH 36057.691 Hz  
FIDRES 1.100393 Hz  
AQ 0.4543829 sec  
RG 65.24  
DW 13.867 usec  
DE 6.50 usec  
TE 301.0 K  
D1 2.00000000 sec  
D11 0.03000000 sec  
TD0 1

===== CHANNEL f1 =====  
SFO1 150.9279571 MHz  
NUC1 13C  
P1 10.50 usec  
PLW1 95.00000000 W

===== CHANNEL f2 =====  
SFO2 600.1724007 MHz  
NUC2 1H  
CPDPRG[2] waltz16  
PCPD2 70.00 usec  
PLW2 21.00000000 W  
PLW12 0.61714000 W  
PLW13 0.30239999 W

F2 - Processing parameters  
SI 16384  
SF 150.9128370 MHz  
WDW EM  
SSB 0  
LB 1.00 Hz  
GB 0  
PC 1.40

# HRMS spectra of 2n

|                      |              |                    |    |                        |              |                               |                     |
|----------------------|--------------|--------------------|----|------------------------|--------------|-------------------------------|---------------------|
| <b>Sample Name</b>   | MB-BT-4-14   | <b>Position</b>    | -1 | <b>Instrument Name</b> | Instrument 1 | <b>User Name</b>              |                     |
| <b>Inj Vol</b>       | -10          | <b>InjPosition</b> |    | <b>SampleType</b>      | Sample       | <b>IRM Calibration Status</b> | Success             |
| <b>Data Filename</b> | MB-BT-4-14.d | <b>ACQ Method</b>  |    | <b>Comment</b>         |              | <b>Acquired Time</b>          | 5/6/2014 2:50:57 PM |

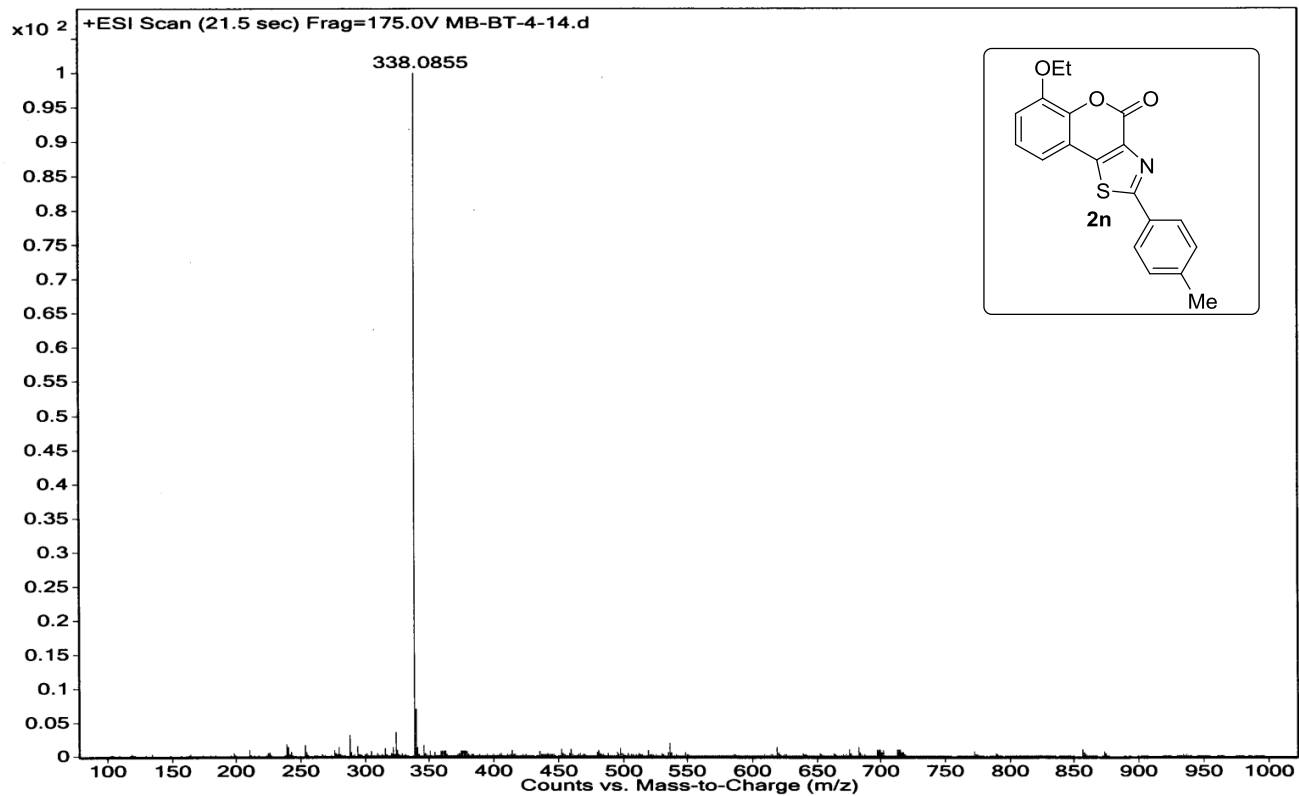

H<sup>1</sup> NMR spectra of **2o**

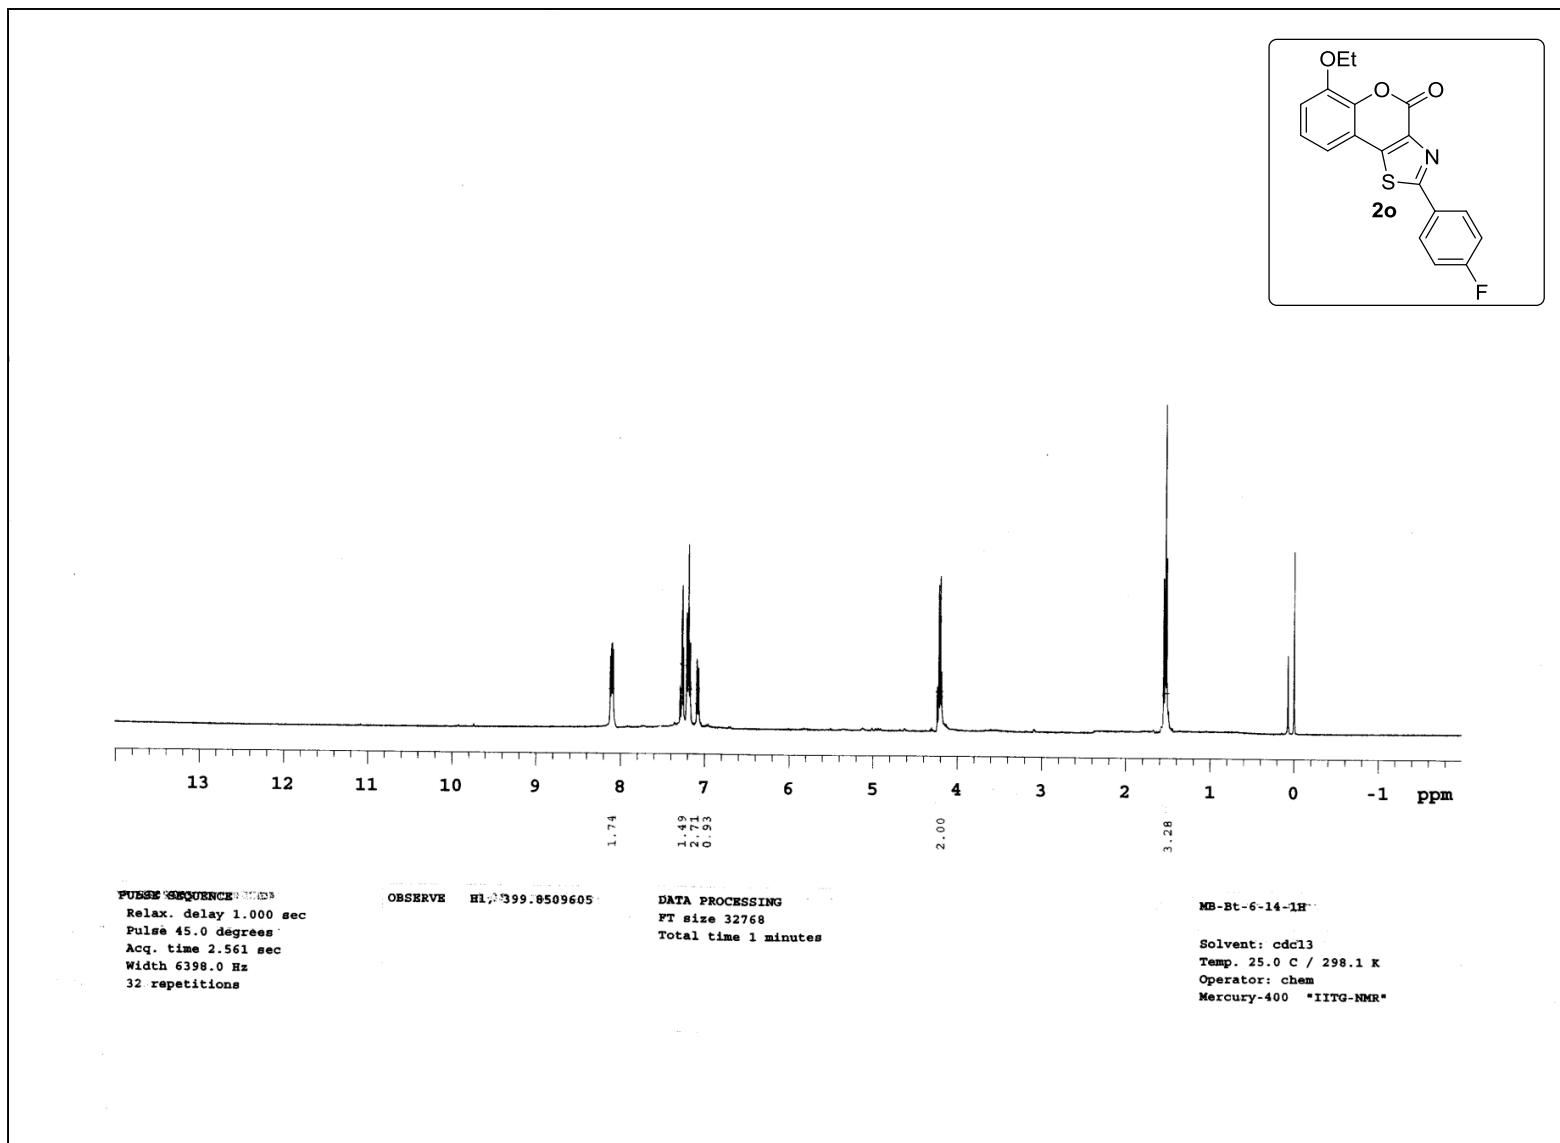

<sup>13</sup>C NMR spectra of **2o**

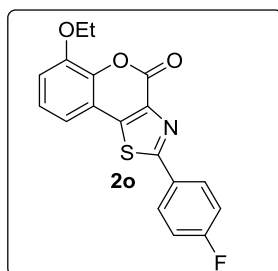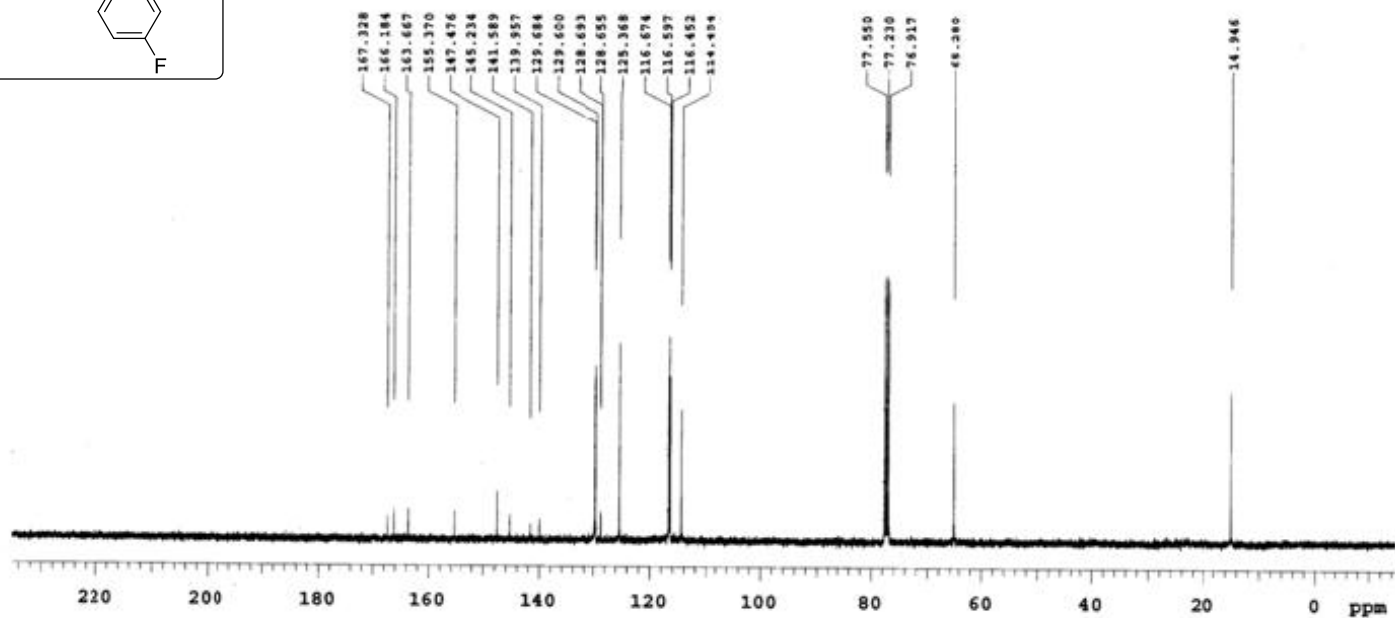

P00000000000000000000  
 Relax. delay 1.000 sec  
 Pulse 45.0 degrees  
 Acq. time 1.304 sec  
 Width 25125.6 Hz  
 2540 repetitions

OBSERVE C13, 100.5425832  
 DECOUPLE H1, 399.8529994  
 Power 42 dB  
 continuously on  
 WALTZ-16 modulated

DATA PROCESSING  
 line broadening 0.5 Hz  
 FT size 65536  
 Total time 97 minutes

MS-BT-6-14-13C

Solvent: cdcl3  
 Temp. 25.0 C / 298.1 K  
 Operator: chem  
 Mercury-400 \*IITG-NMR\*

HRMS spectra of **2o**

|                      |              |                    |             |                        |                                   |                               |             |
|----------------------|--------------|--------------------|-------------|------------------------|-----------------------------------|-------------------------------|-------------|
| <b>Sample Name</b>   | Unavailable  | <b>Position</b>    | Unavailable | <b>Instrument Name</b> | Unavailable                       | <b>User Name</b>              | Unavailable |
| <b>Inj Vol</b>       | Unavailable  | <b>InjPosition</b> | Unavailable | <b>SampleType</b>      | Unavailable                       | <b>IRM Calibration Status</b> | Success     |
| <b>Data Filename</b> | MB-BT-6-14.d | <b>ACQ Method</b>  |             | <b>Comment</b>         | Sample information is unavailable | <b>Acquired Time</b>          | Unavailable |

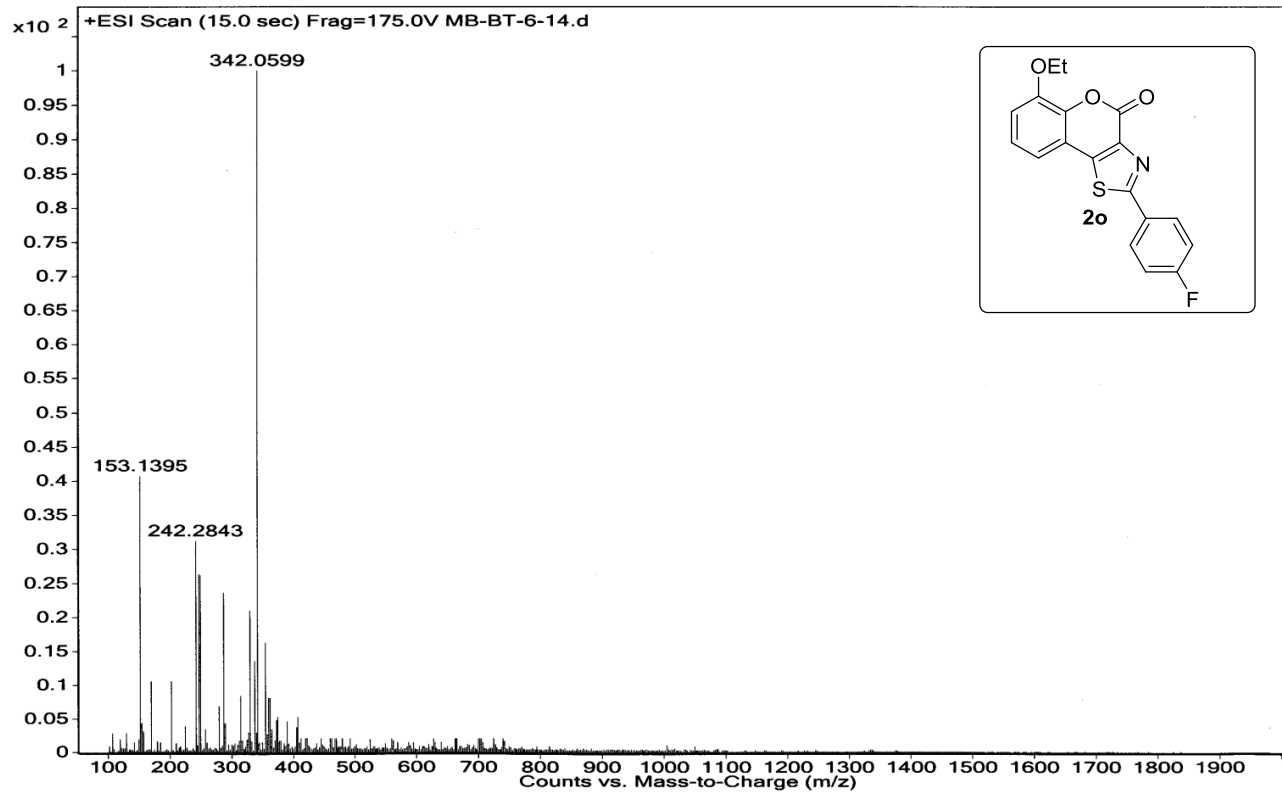

# <sup>1</sup>H NMR spectra of **2p**

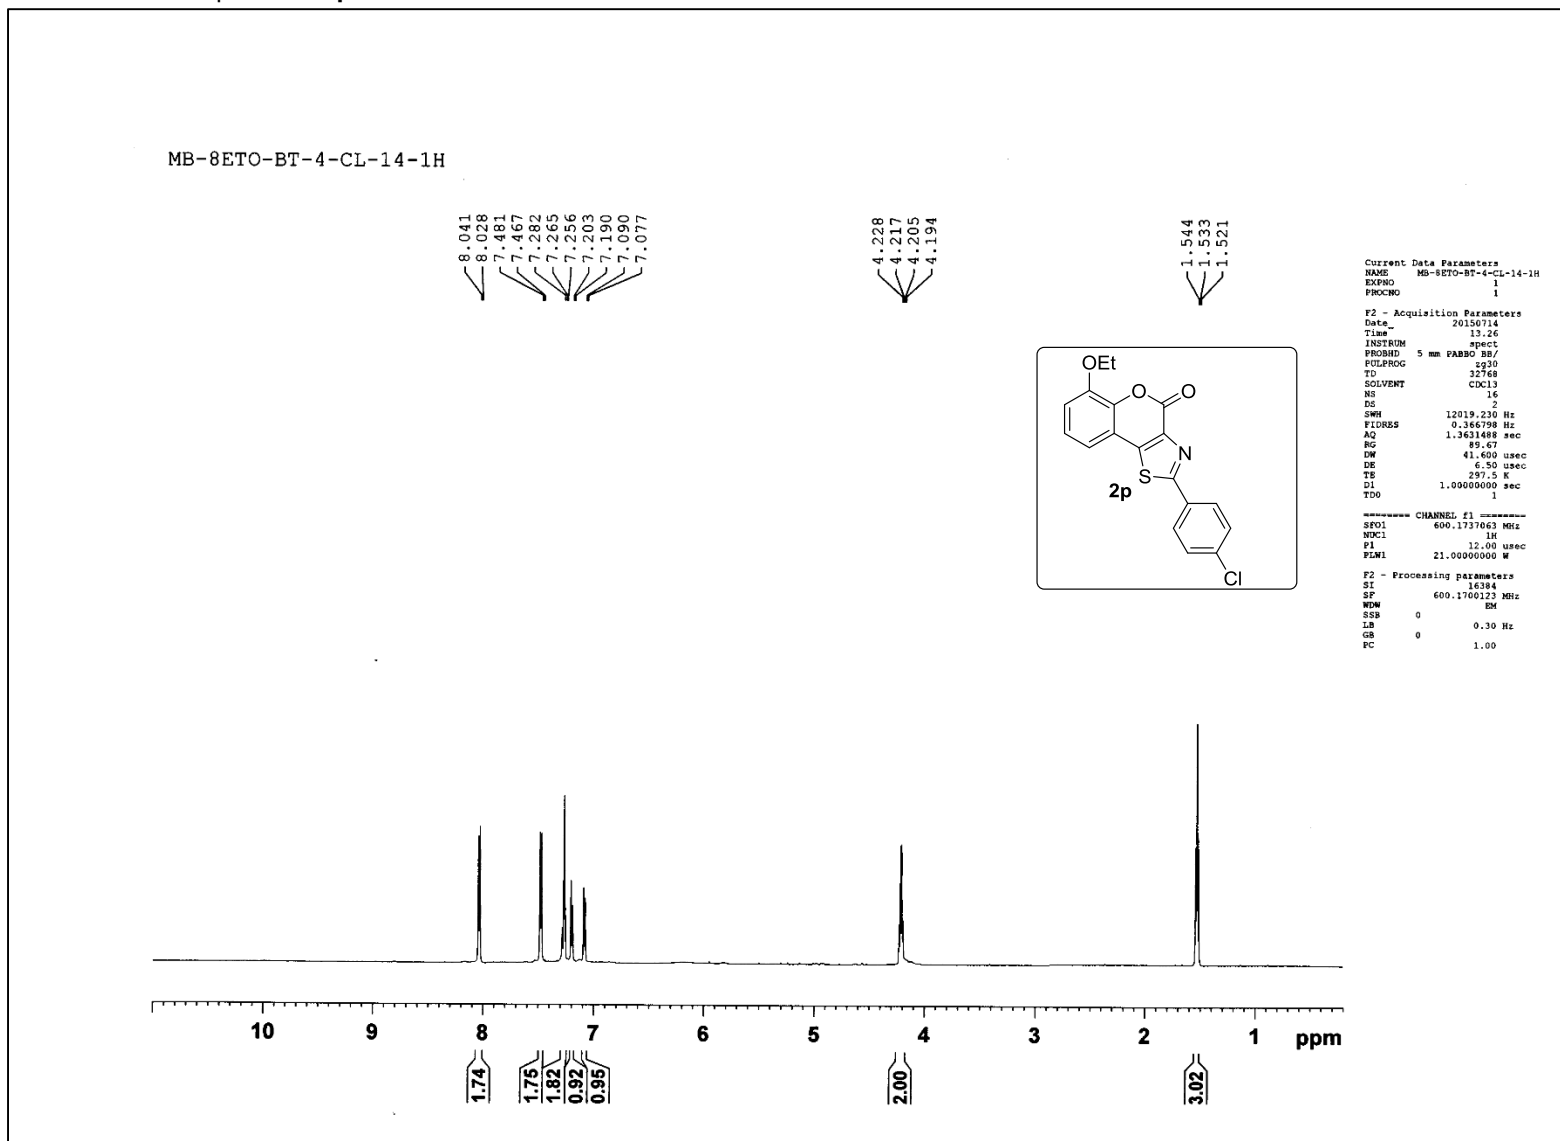

<sup>13</sup>C NMR spectra of **2p**

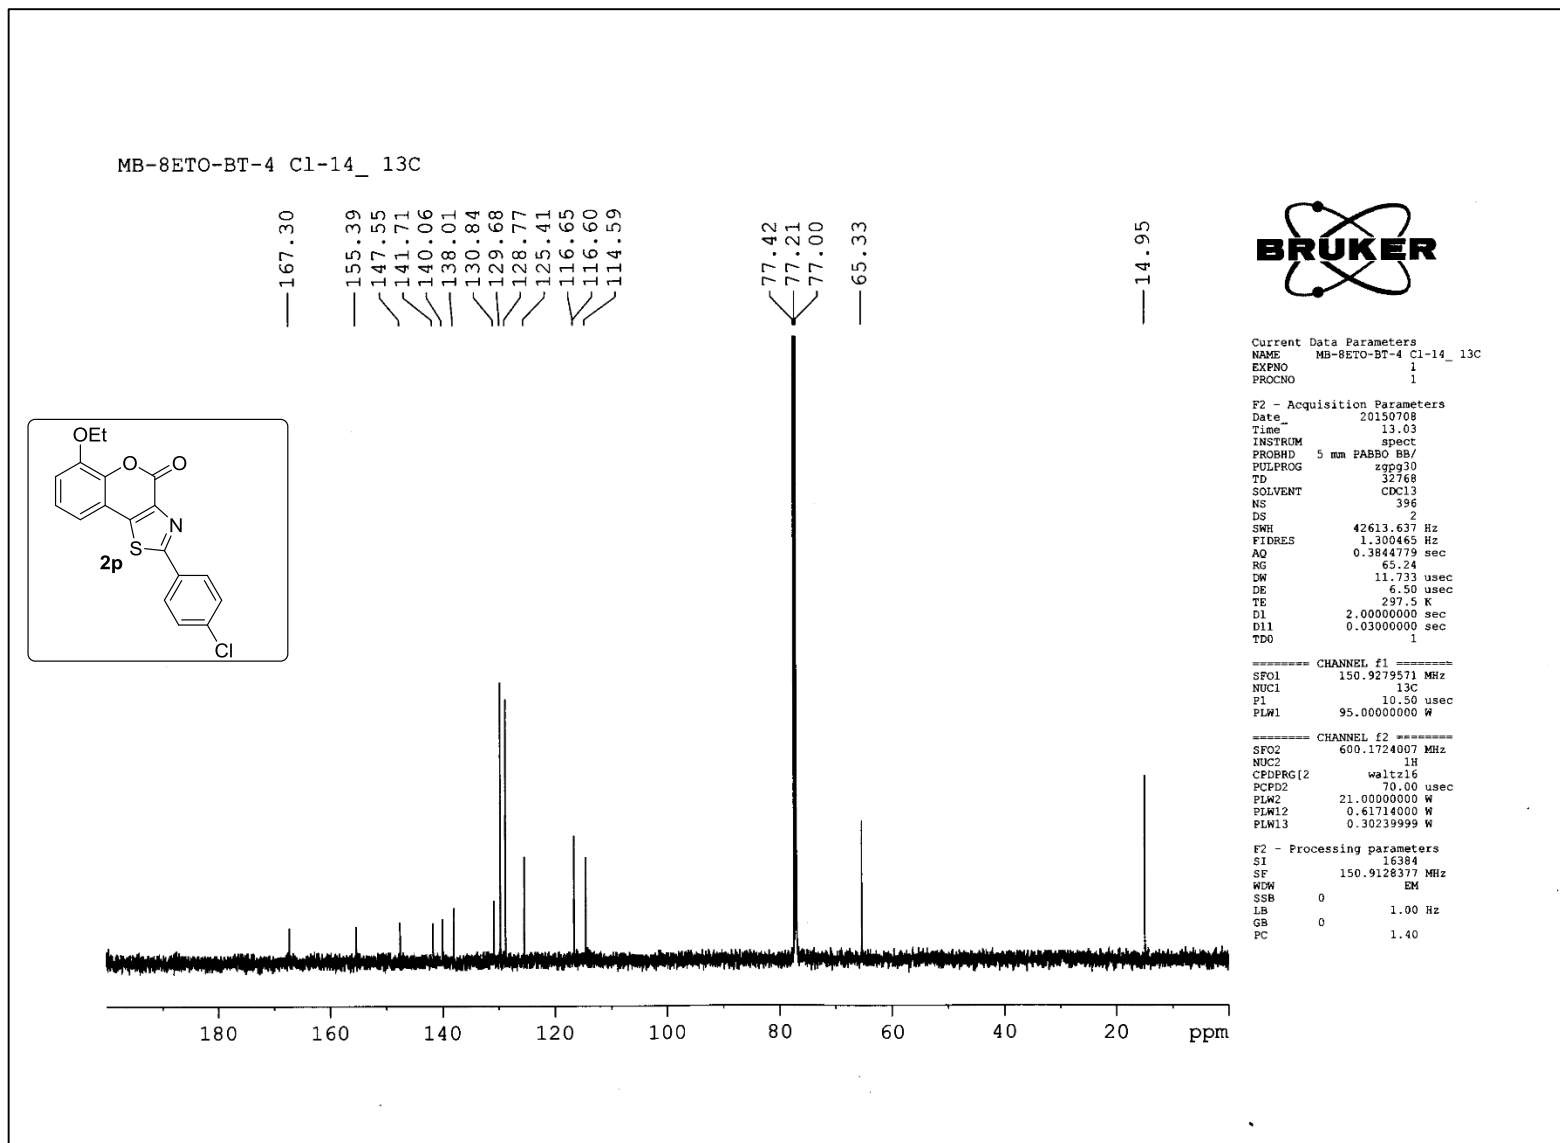

# HRMS spectra of 2p

Sample Name  
Inj Vol  
Data Filename

Position  
InjPosition  
ACQ Method

Instrument Name  
SampleType  
Comment

User Name  
IRM Calibration Status  
Acquired Time

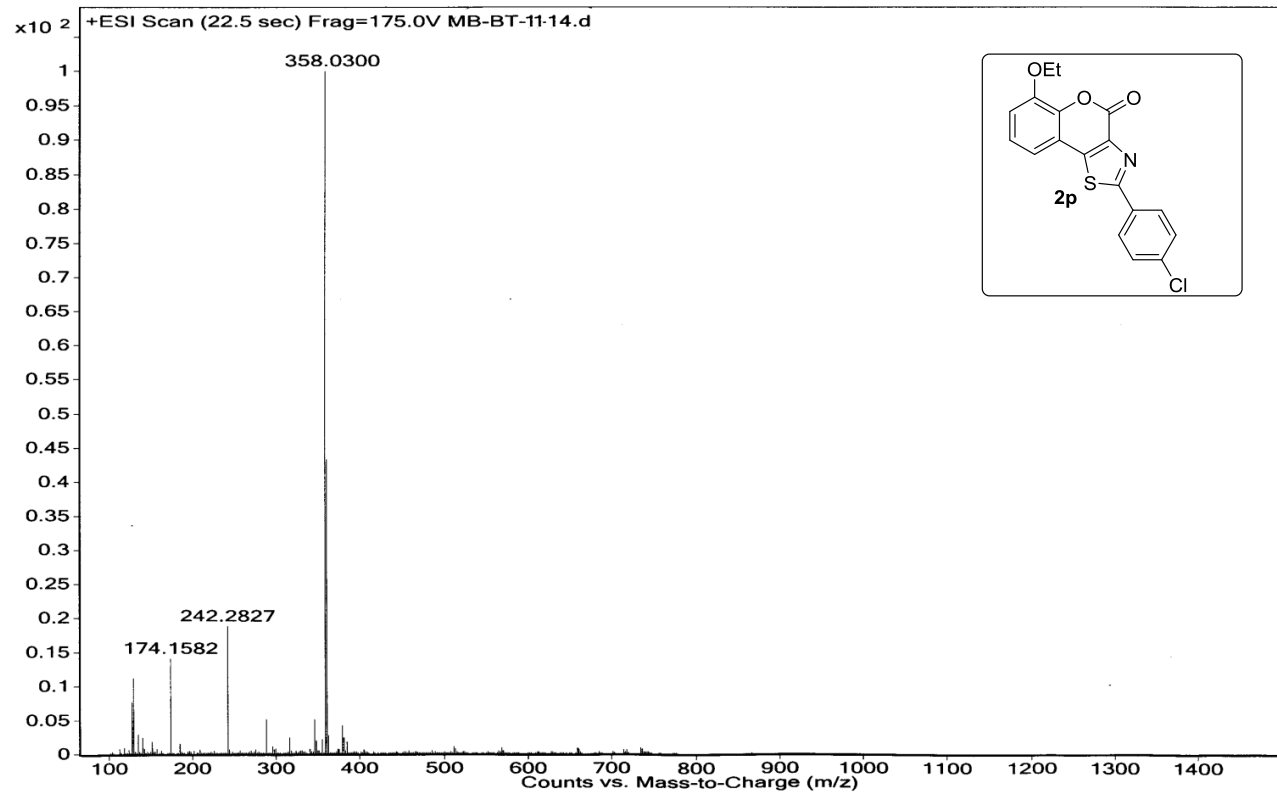



# <sup>1</sup>H NMR Spectra of **2q**

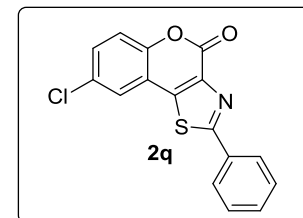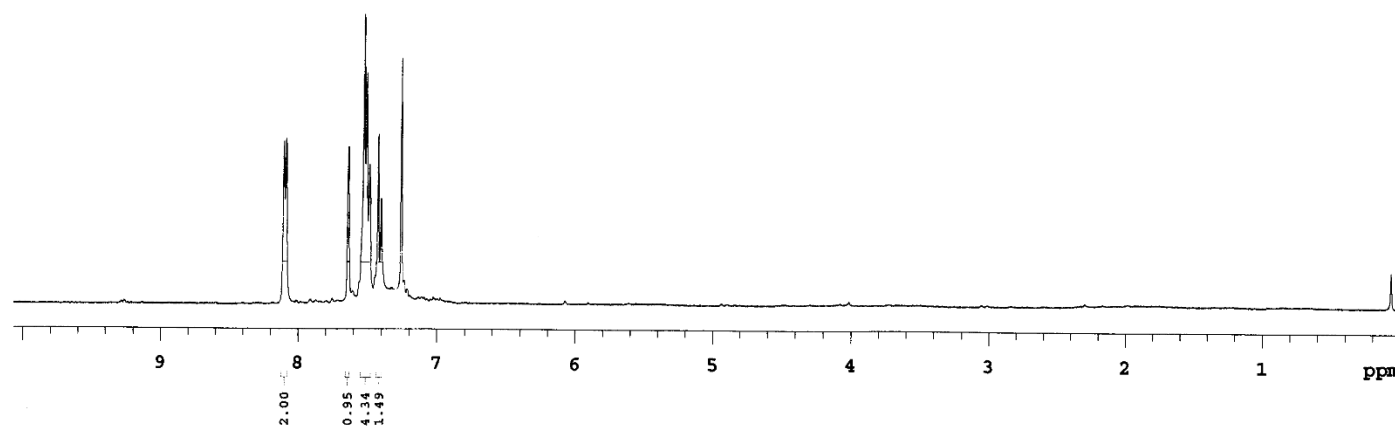

|                                                                                                                                   |                                |                                                                 |                                                                                                                                                             |
|-----------------------------------------------------------------------------------------------------------------------------------|--------------------------------|-----------------------------------------------------------------|-------------------------------------------------------------------------------------------------------------------------------------------------------------|
| <b>PULSE SEQUENCE</b><br>Relax. delay 1.000 sec<br>Pulse 45.0 degrees<br>Acq. time 2.561 sec<br>Width 6398.0 Hz<br>32 repetitions | <b>OBSERVE</b> H1, 399.8509637 | <b>DATA PROCESSING</b><br>FT size 32768<br>Total time 1 minutes | <b>MB-Bt-20-14-1H-6-Cl-amn</b><br><br>Solvent: cdcl3<br>Temp. 25.0 C / 298.1 K<br>Operator: chem<br>File: MB-Bt-20-14-1H-6-Cl-amn<br>Mercury-400 "IITG-NMR" |
|-----------------------------------------------------------------------------------------------------------------------------------|--------------------------------|-----------------------------------------------------------------|-------------------------------------------------------------------------------------------------------------------------------------------------------------|

<sup>13</sup>C NMR spectra of **2q**

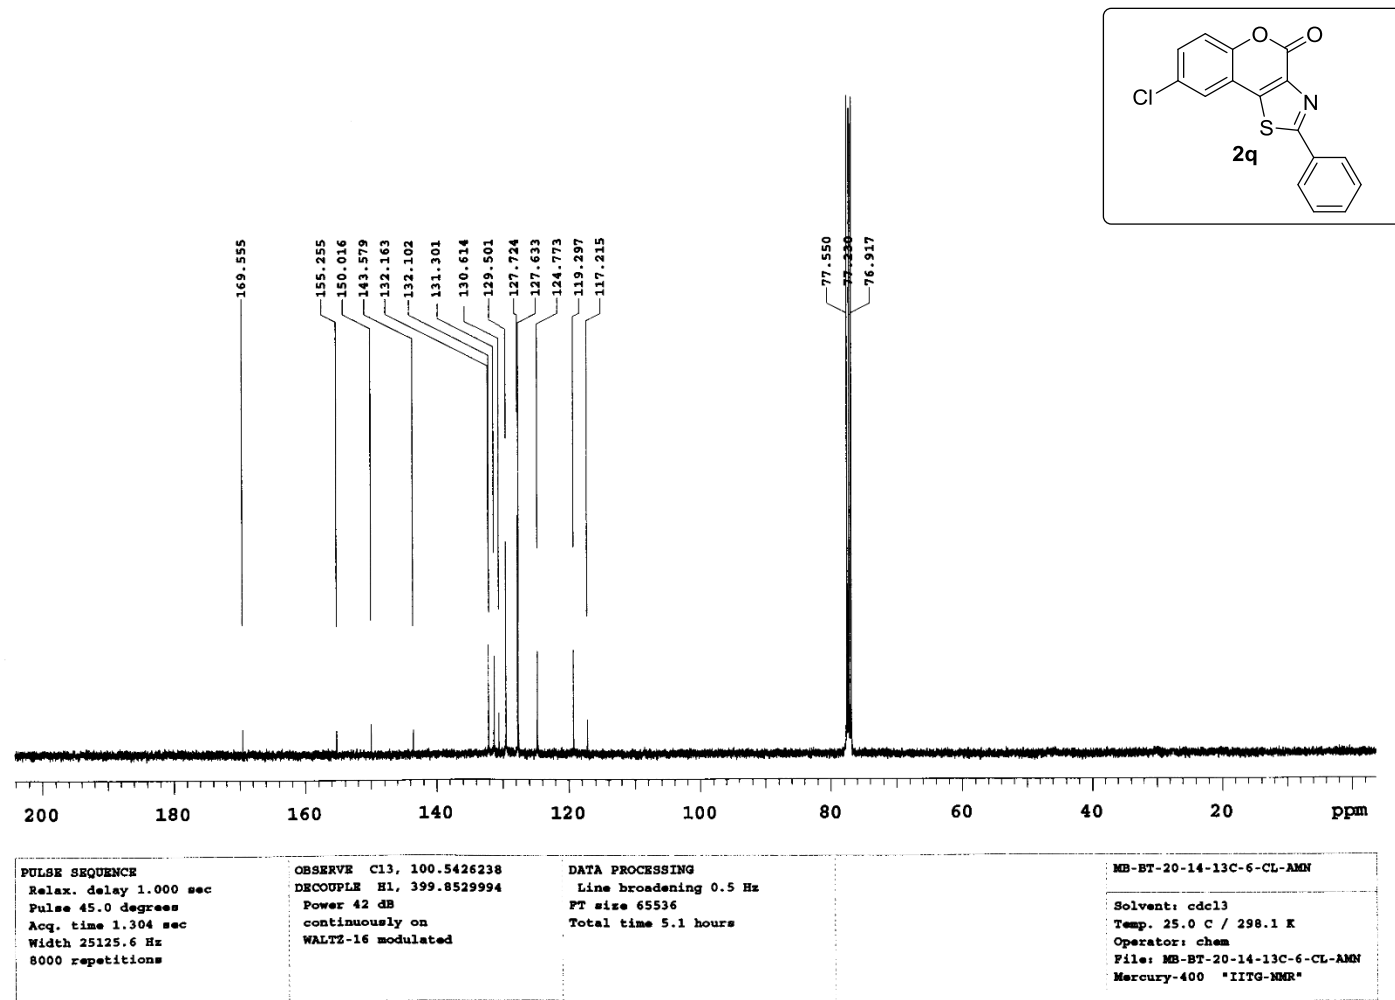

# HRMS spectra of **2q**

Sample Name  
Inj Vol  
Data Filename

Position  
InjPosition  
ACQ Method

Instrument Name  
SampleType  
Comment

User Name  
IRM Calibration Status  
Acquired Time

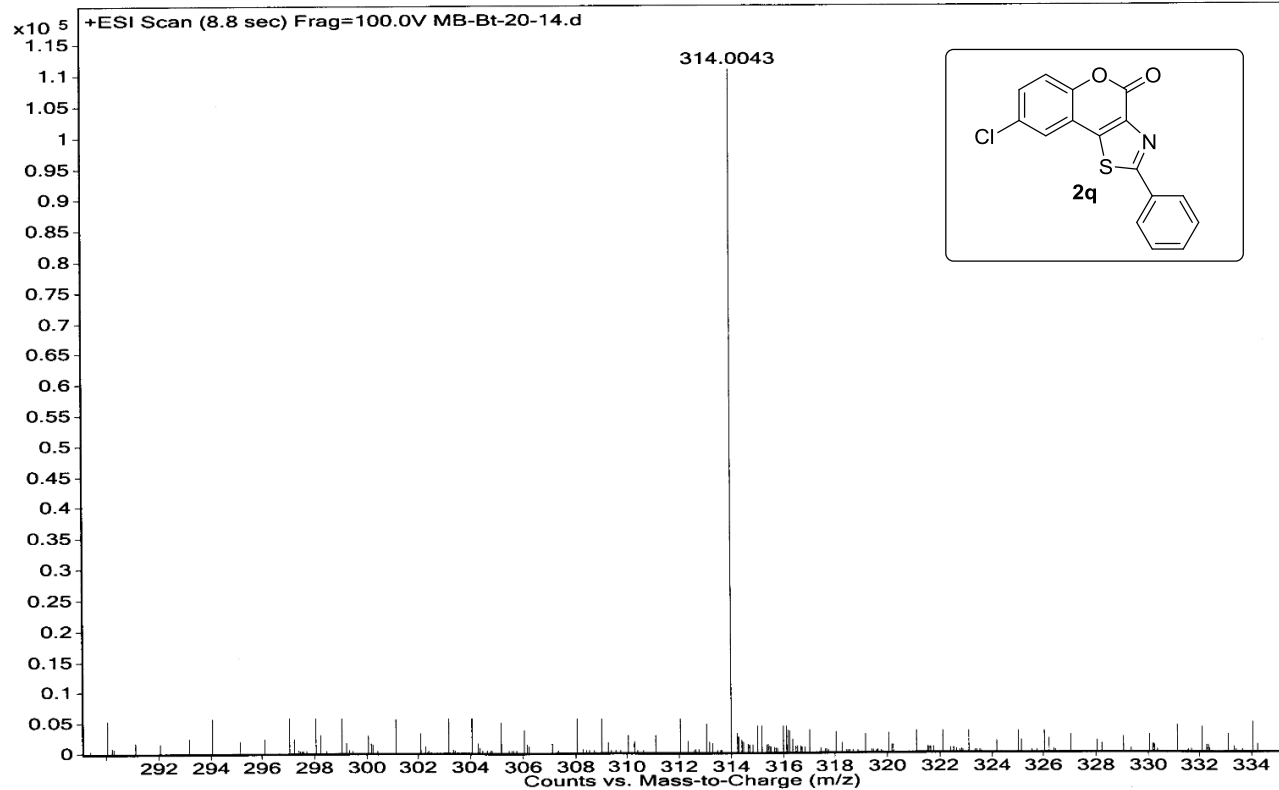

# <sup>1</sup>H NMR Spectra of **2r**

MB-Bt-6Br-Amm-14\_1H

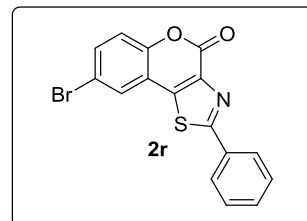

Current Data Parameters  
NAME MB-Bt-6Br-Amm-14\_1H  
EXPNO 1  
PROCNO 1

F2 - Acquisition Parameters  
Date\_ 20150325  
Time 12.20  
INSTRUM spect  
PROBHD 5 mm PABBO BB/  
PULPROG zg30  
TD 32768  
SOLVENT CDCl3  
NS 16  
DS 2  
SWH 12019.230 Hz  
FIDRES 0.366798 Hz  
AQ 1.3651488 sec  
RG 143.33  
DW 41.600 usec  
DE 6.50 usec  
TE 297.3 K  
D1 1.00000000 sec  
TD0 1

===== CHANNEL f1 =====  
SFO1 600.1737063 MHz  
NUC1 1H  
P1 12.00 usec  
PLW1 21.00000000 W

F2 - Processing parameters  
SI 16384  
SF 600.1700144 MHz  
WDW EM  
SSB 0  
LB 0.30 Hz  
GB 0  
PC 1.00

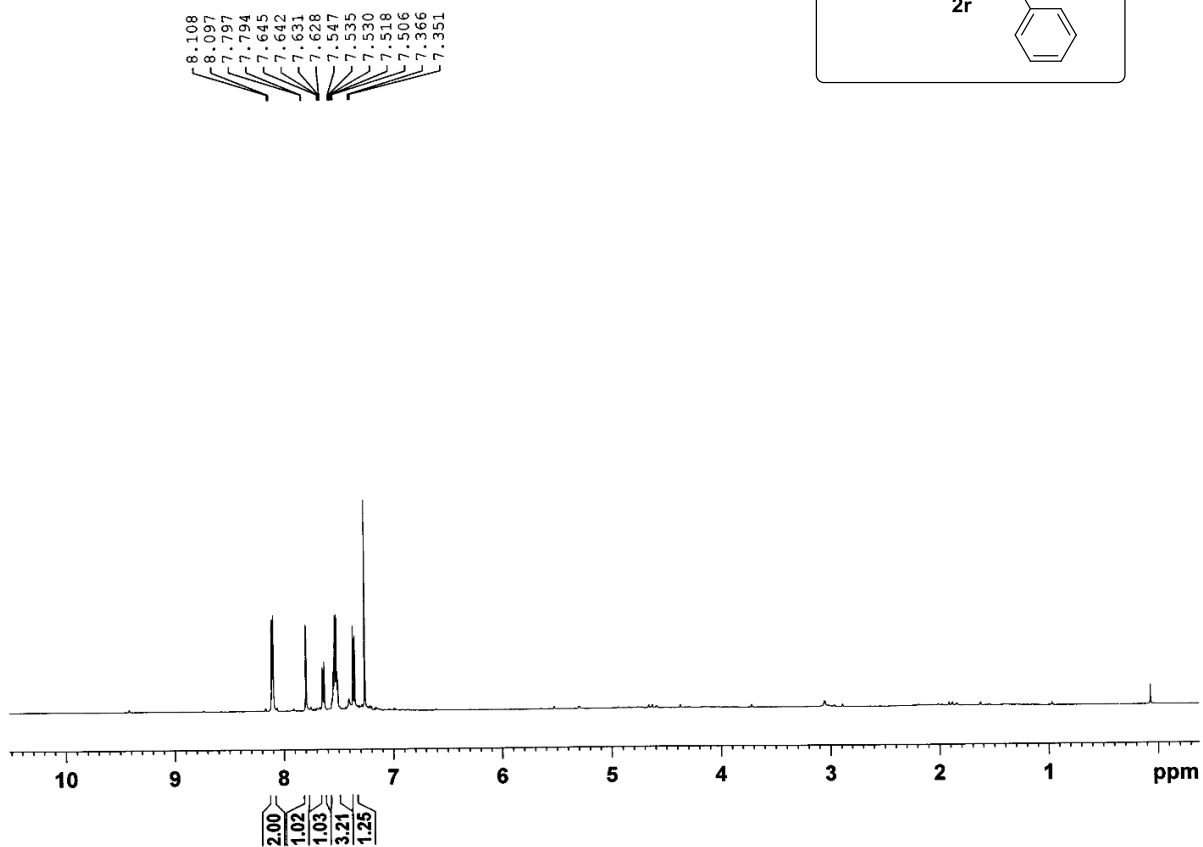

<sup>13</sup>C NMR spectra of 2r

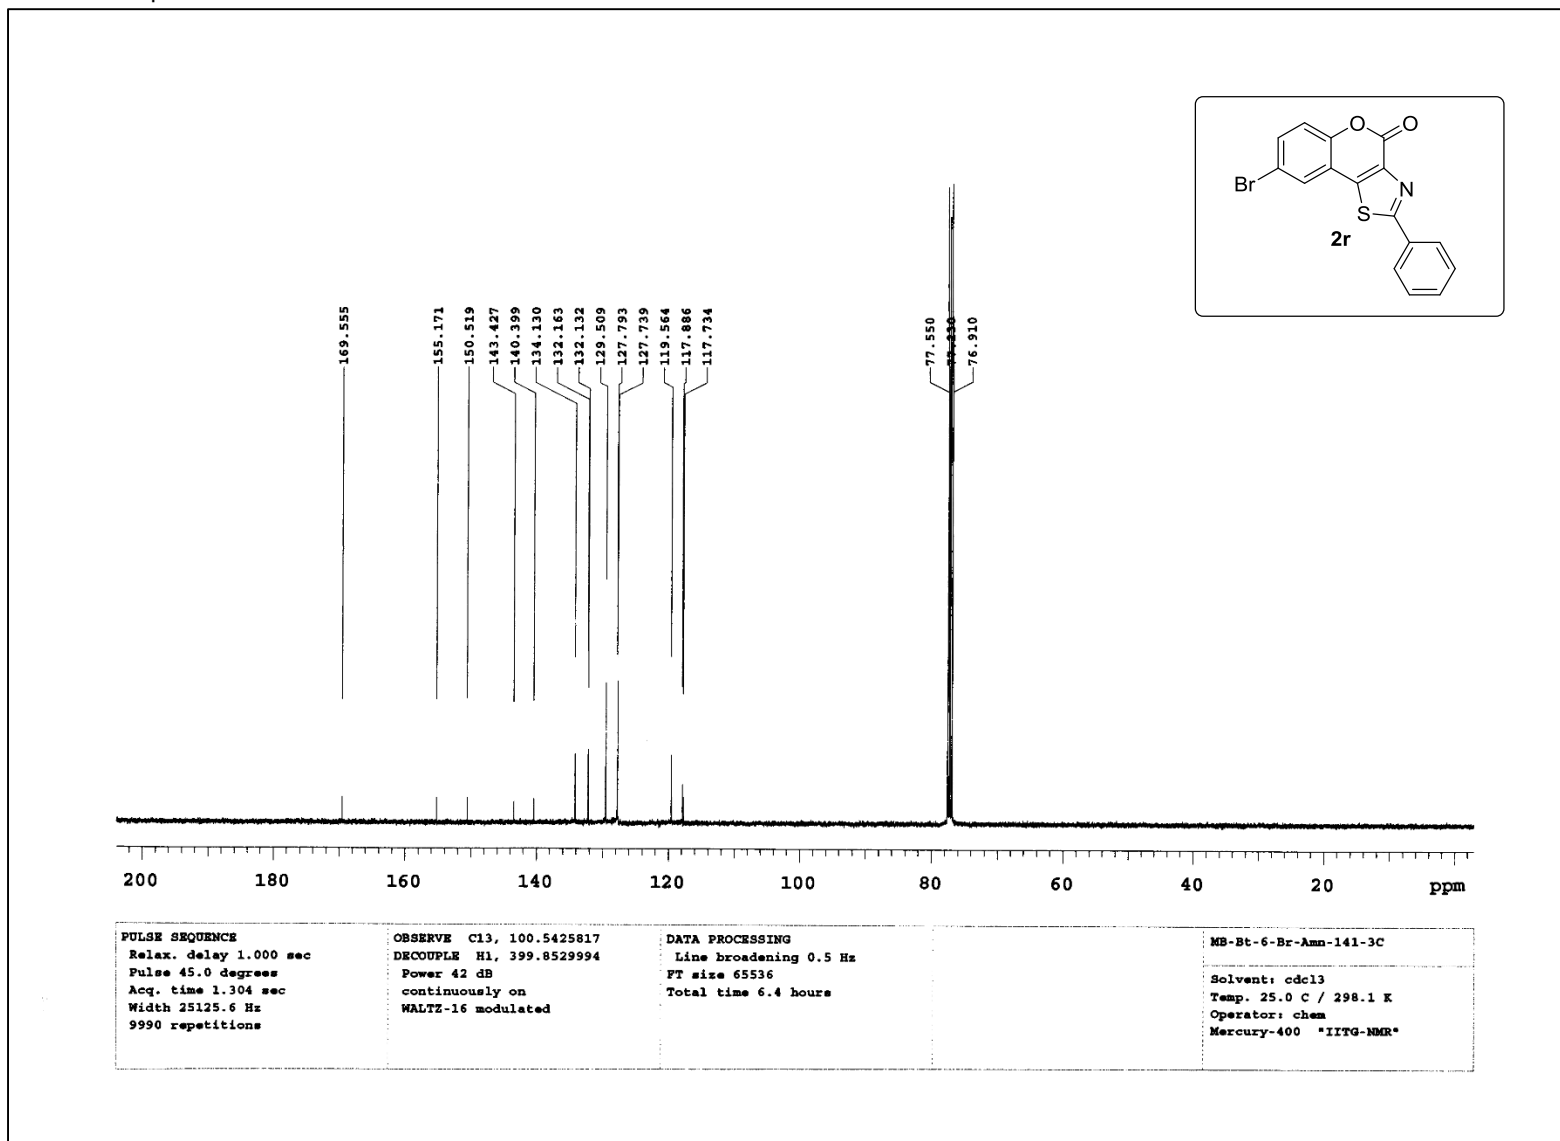

# HRMS Spectra of 2r

| Sample Name<br>Inj Vol<br>Data Filename | Position<br>InjPosition<br>ACQ Method | Instrument Name<br>SampleType<br>Comment | User Name<br>IRM Calibration Status<br>Acquired Time |
|-----------------------------------------|---------------------------------------|------------------------------------------|------------------------------------------------------|
|-----------------------------------------|---------------------------------------|------------------------------------------|------------------------------------------------------|

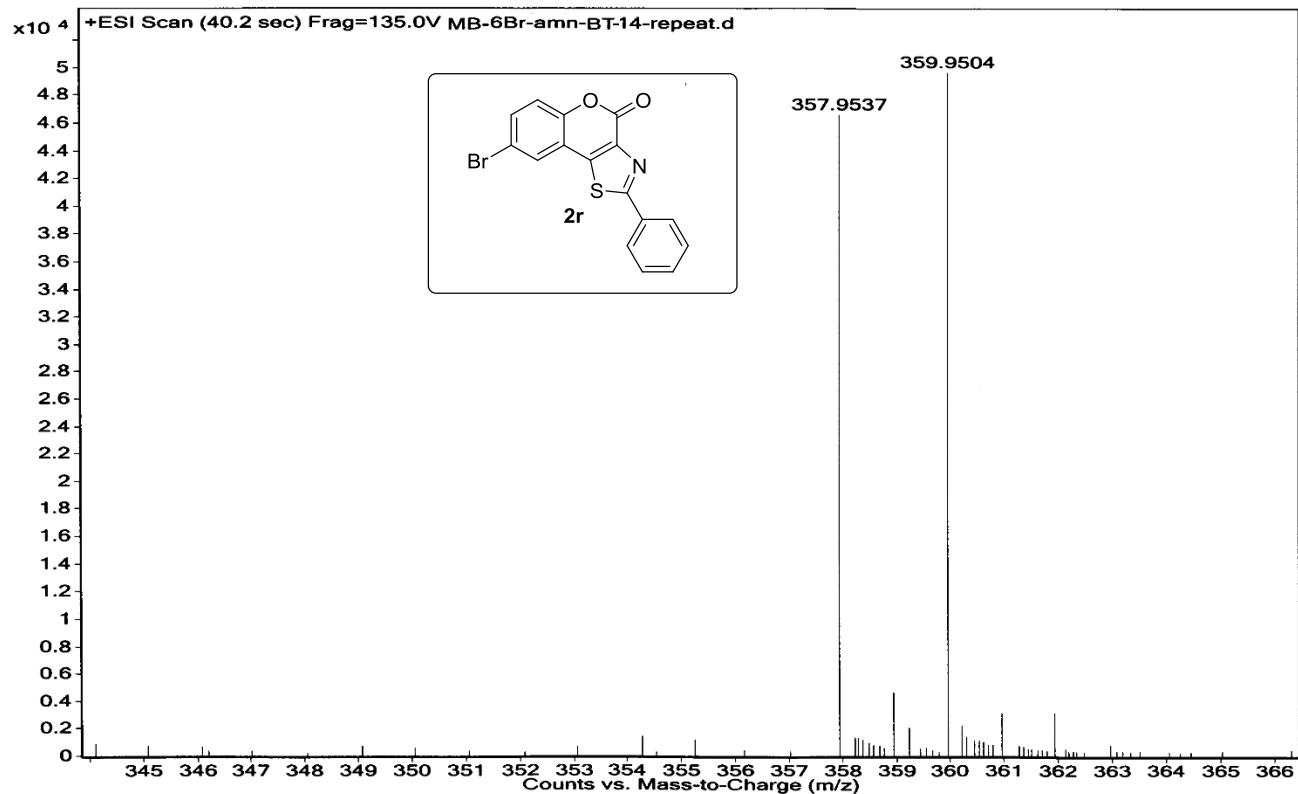

# $^1\text{H}$ NMR spectra of **2s**

MB-BT-THIO-14-1H

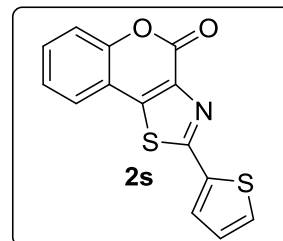

```

Current Data Parameters
NAME      MB-BT-THIO-14-1H
EXPNO     1
PROCNO    1

F2 - Acquisition Parameters
Date_     20150818
Time      13.20
INSTRUM    spect
PROBHD     5 mm PABBO BB/
PULPROG    zg30
TD         32768
SOLVENT    CDCl3
NS         16
DS         2
SWH         12019.230 Hz
FIDRES     0.366798 Hz
AQ         1.3631488 sec
RG         80.22
DW         41.600 usec
DE         6.50 usec
TE         292.7 K
D1         1.00000000 sec
TDO        1

===== CHANNEL f1 =====
SFO1       600.1737063 MHz
NUC1        1H
P1         12.00 usec
PL1        21.00000000 W

F2 - Processing parameters
SI         16384
SF         600.1700151 MHz
WDW         EM
SSB         0
LB         0.30 Hz
GB         0
PC         1.00
    
```

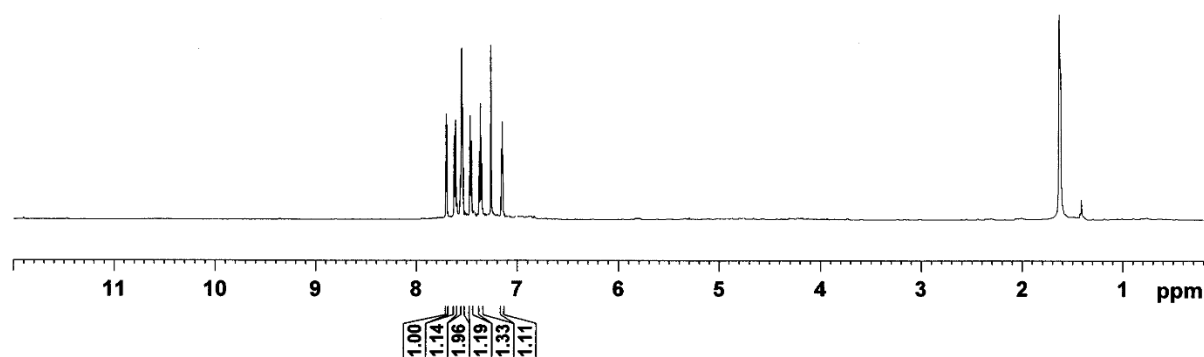

<sup>13</sup>C NMR spectra of **2s**

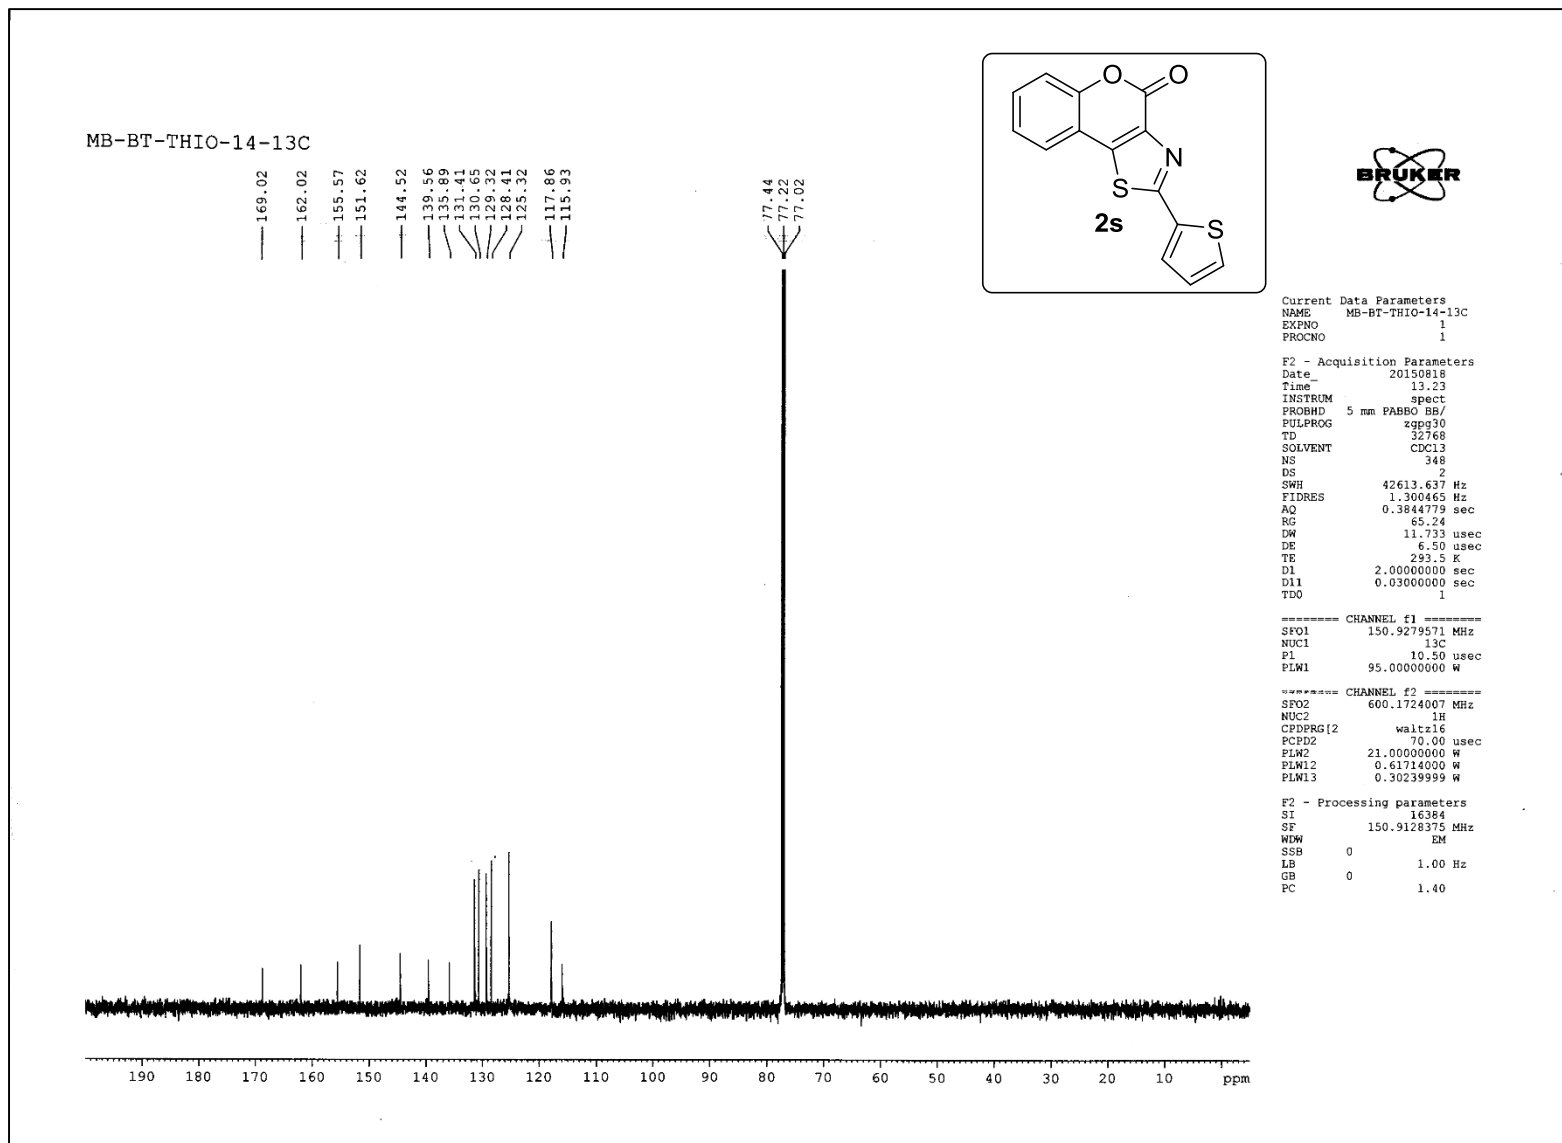



# HRMS spectra of **2s**

|                      |                 |                    |             |                        |                                   |                               |             |
|----------------------|-----------------|--------------------|-------------|------------------------|-----------------------------------|-------------------------------|-------------|
| <b>Sample Name</b>   | Unavailable     | <b>Position</b>    | Unavailable | <b>Instrument Name</b> | Unavailable                       | <b>User Name</b>              | Unavailable |
| <b>Inj Vol</b>       | Unavailable     | <b>InjPosition</b> | Unavailable | <b>SampleType</b>      | Unavailable                       | <b>IRM Calibration Status</b> | Success     |
| <b>Data Filename</b> | MB-BT-THIO-14.d | <b>ACQ Method</b>  |             | <b>Comment</b>         | Sample information is unavailable | <b>Acquired Time</b>          | Unavailable |

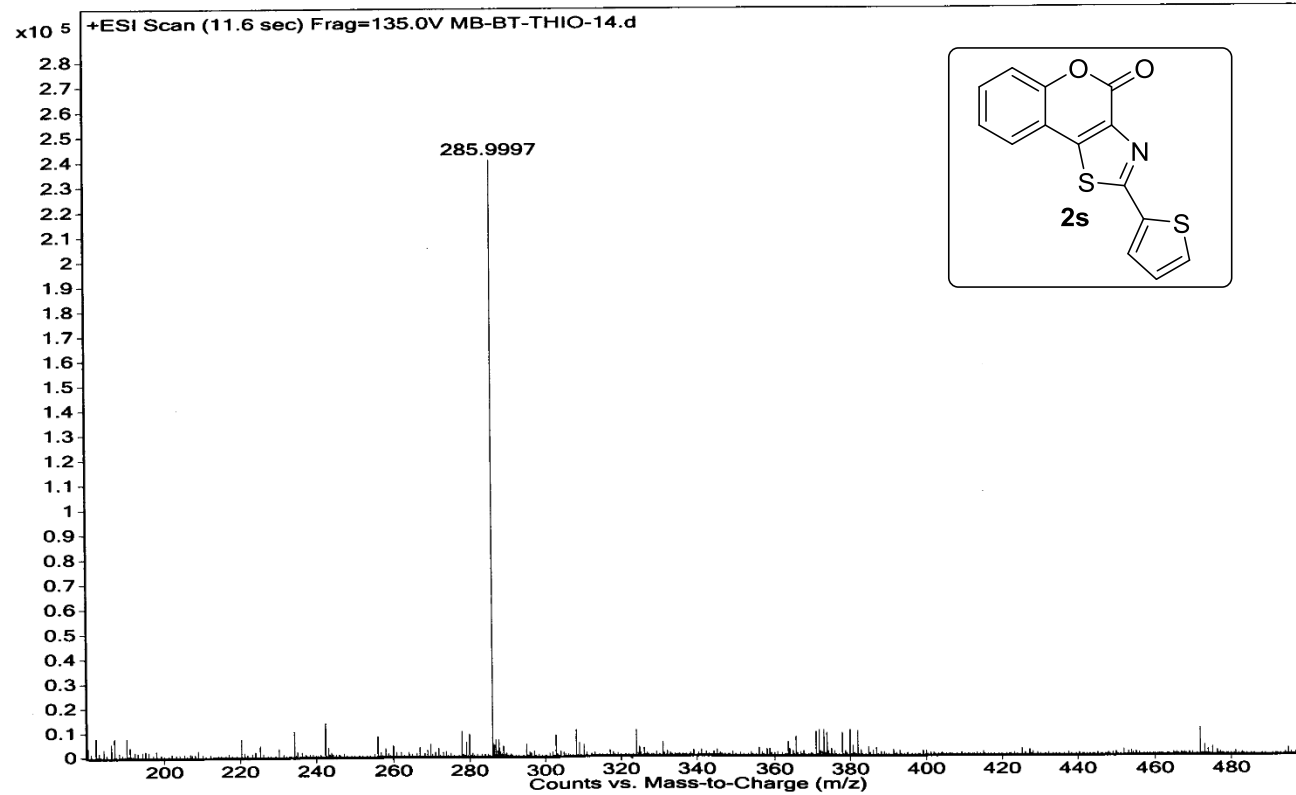

# <sup>1</sup>H NMR spectra of **2t**

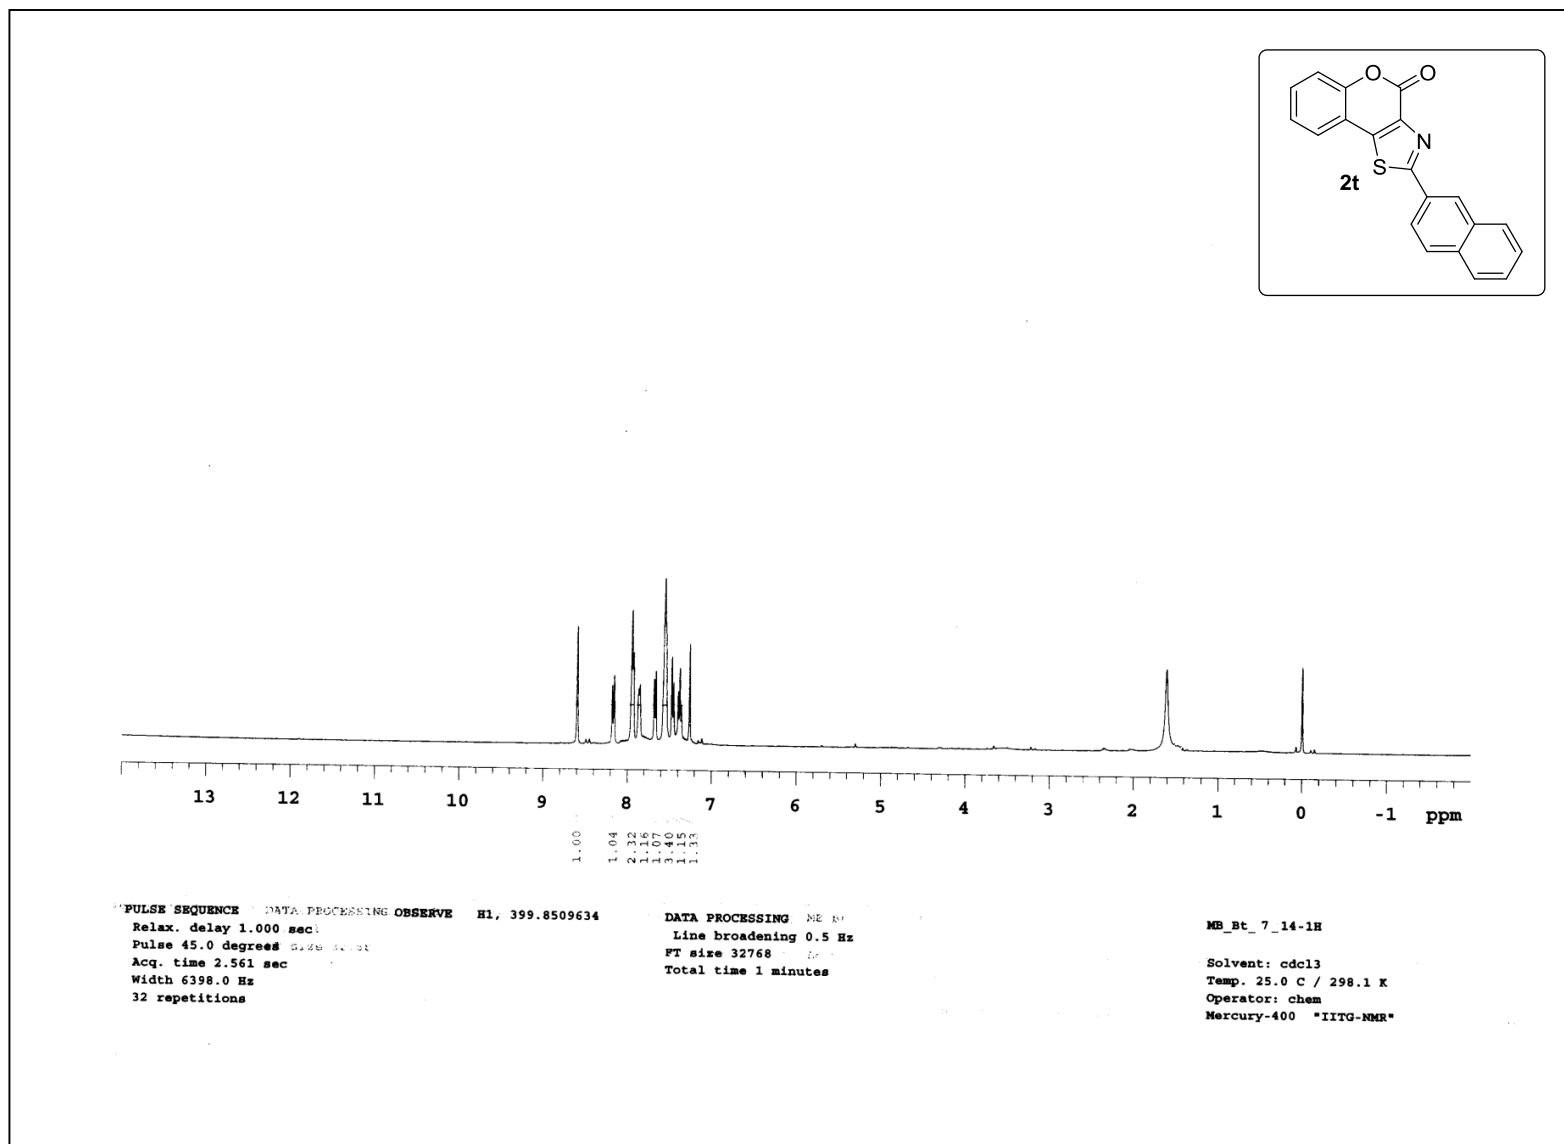

<sup>13</sup>C NMR spectra of **2t**

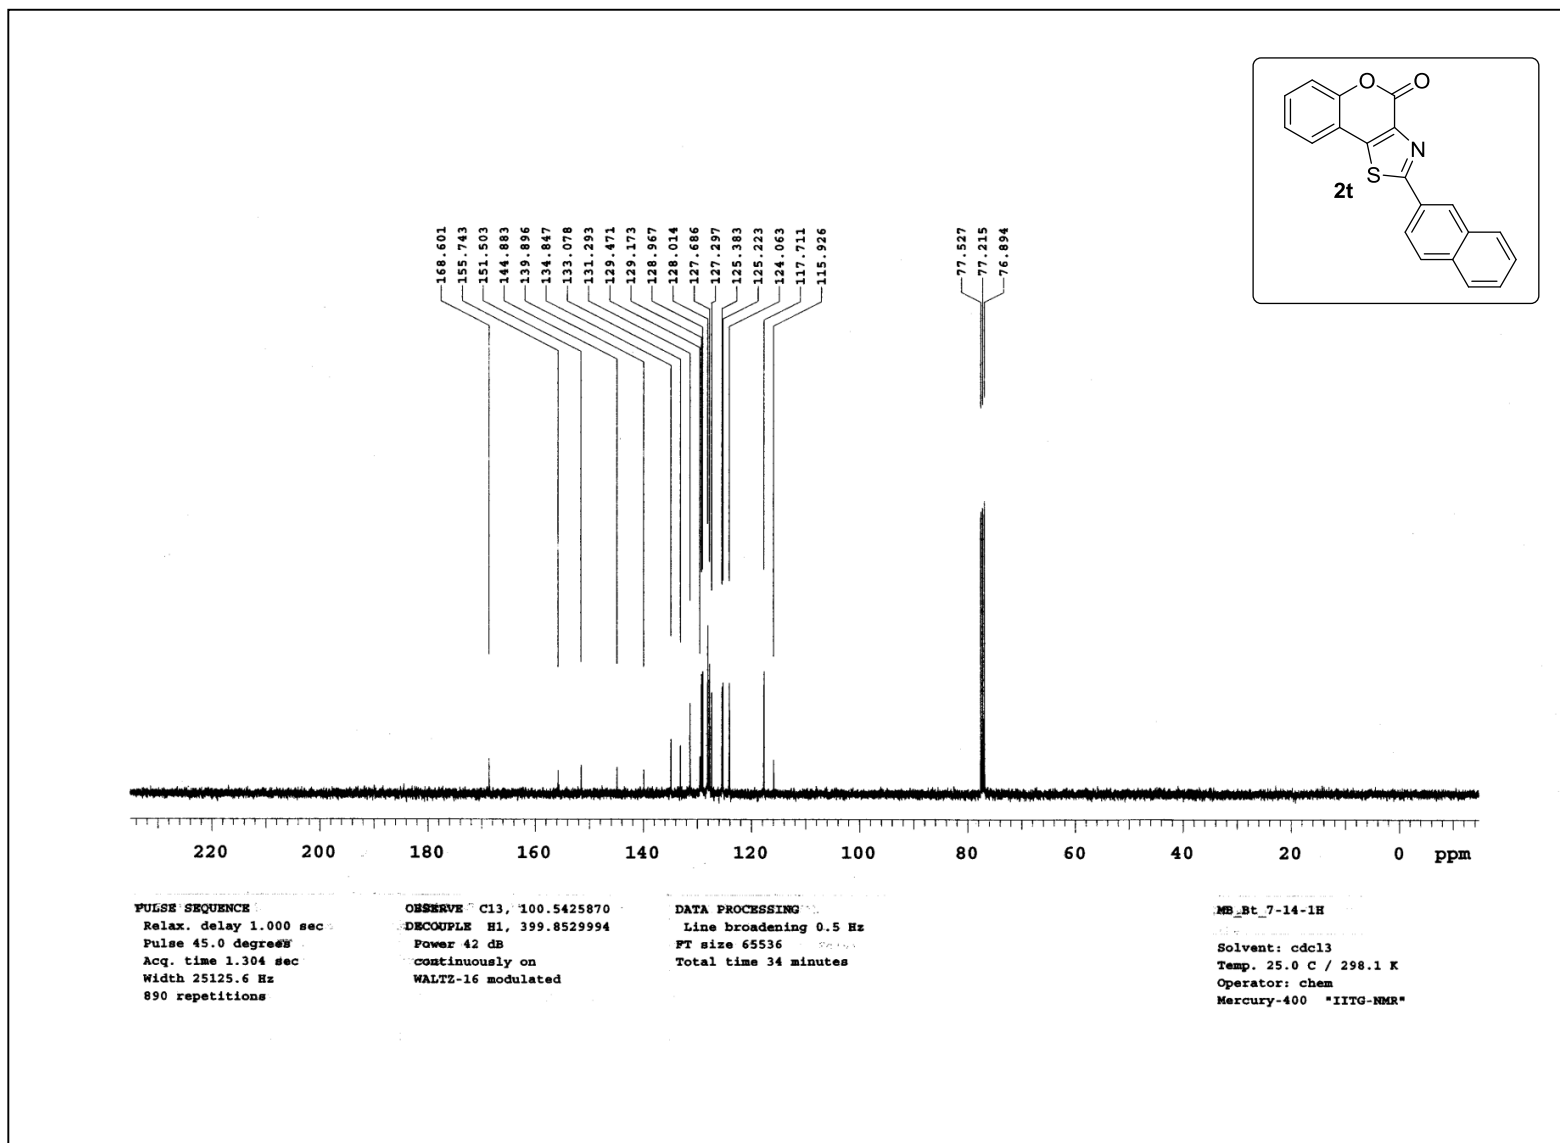

HRMS spectra of **2t**

|               |              |             |             |                 |                                   |                        |             |
|---------------|--------------|-------------|-------------|-----------------|-----------------------------------|------------------------|-------------|
| Sample Name   | Unavailable  | Position    | Unavailable | Instrument Name | Unavailable                       | User Name              | Unavailable |
| Inj Vol       | Unavailable  | InjPosition | Unavailable | SampleType      | Unavailable                       | IRM Calibration Status | Success     |
| Data Filename | MB-BT-7-14.d | ACQ Method  |             | Comment         | Sample information is unavailable | Acquired Time          | Unavailable |

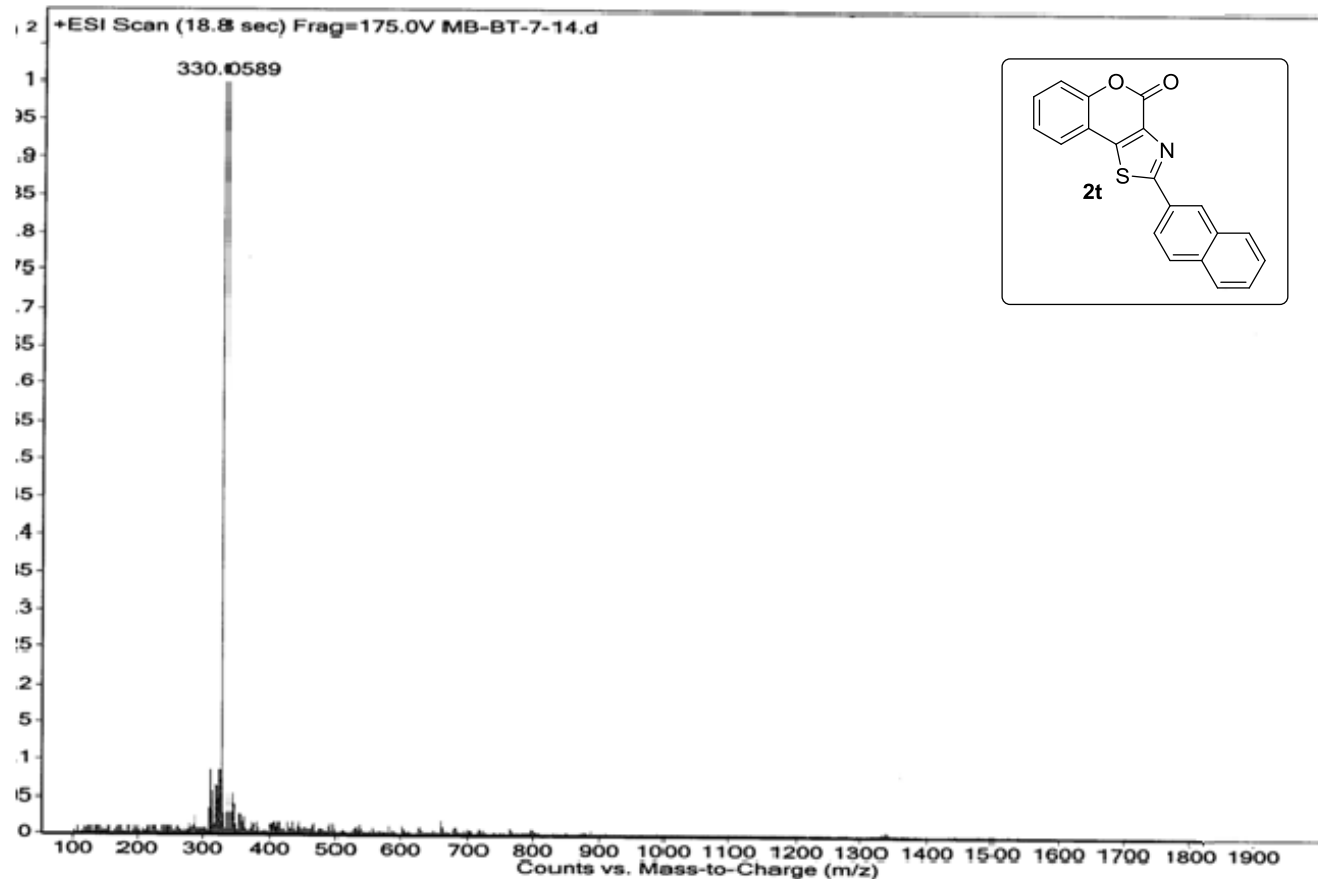

# <sup>1</sup>H NMR spectra of **2u**

MB-8MEO-BT-NAPH-14-1H

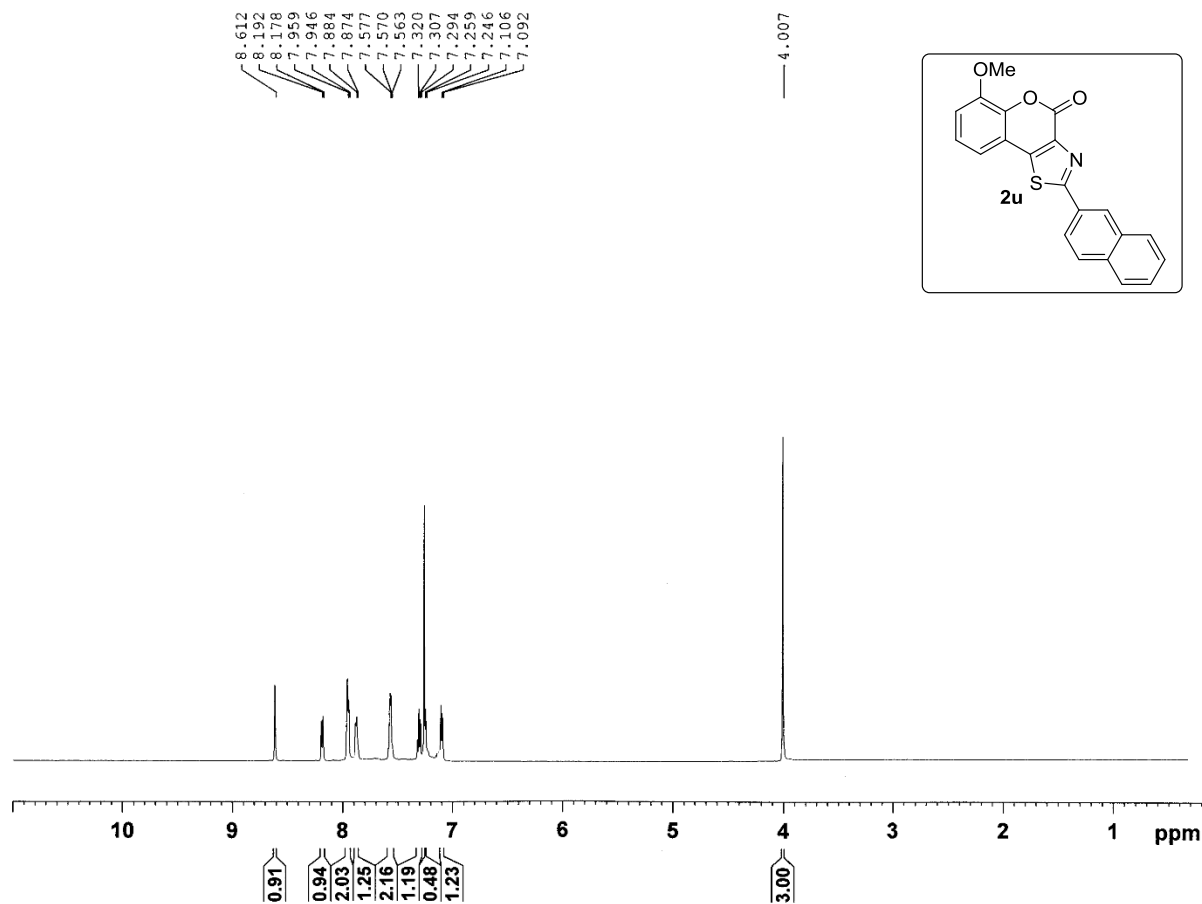

Current Data Parameters  
NAME MB-8MEO-BT-NAPH-14-1H  
EXPNO 1  
PROCNO 1

F2 - Acquisition Parameters  
Date\_ 20150706  
Time 16.58  
INSTRUM spect  
PROBHD 5 mm PABBO BB/  
PULPROG zg30  
TD 32768  
SOLVENT CDCl3  
NS 16  
DS 2  
SWH 12019.230 Hz  
FIDRES 0.366798 Hz  
AQ 1.3621488 sec  
RG 39.36  
DW 41.600 usec  
DE 6.50 usec  
TE 296.7 K  
D1 1.00000000 sec  
TDO 1

===== CHANNEL f1 =====  
SFO1 600.137063 MHz  
NUC1 1H  
P1 12.00 usec  
PLW1 21.00000000 W

F2 - Processing parameters  
SI 16384  
SF 600.1700147 MHz  
WDW EM  
SSB 0  
LB 0.30 Hz  
GB 0  
PC 1.00

<sup>13</sup>C NMR spectra of **2u**

MB-8MEO-BT-NAPTH-14-13C

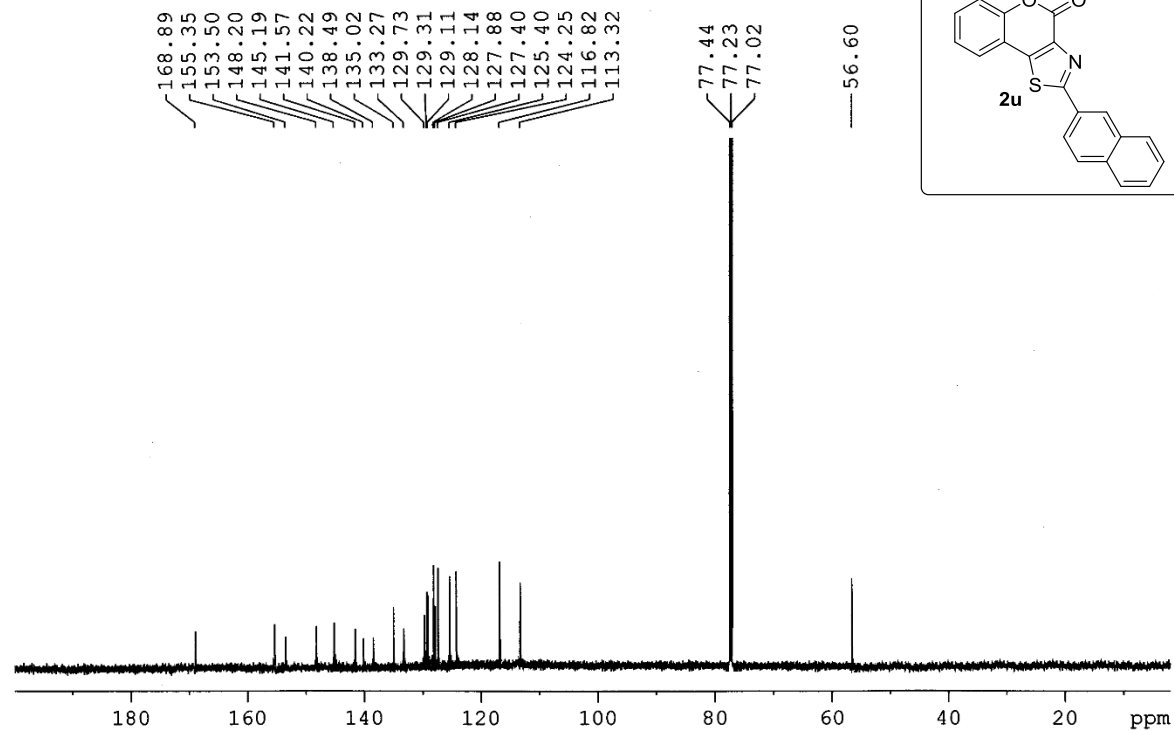

**BRUKER**

Current Data Parameters  
NAME MB-8MEO-BT-NAPTH-14-13C  
EXPNO 1  
PROCNO 1

F2 - Acquisition Parameters  
Data 20150714  
Time 8.34  
INSTRUM spect  
PROBHD 5 mm PABBO BB/  
PULPROG zgpg30  
TD 32768  
SOLVENT CDCl3  
NS 933  
DS 2  
SWH 42613.637 Hz  
FIDRES 1.300465 Hz  
AQ 0.3848779 sec  
RG 65.24  
DW 11.733 usec  
DE 6.50 usec  
TE 298.0 K  
D1 2.00000000 sec  
D11 0.03000000 sec  
TDO 1

===== CHANNEL f1 =====  
SFO1 150.9279571 MHz  
NUC1 13C  
P1 10.50 usec  
PLM1 95.00000000 W

===== CHANNEL f2 =====  
SFO2 600.1724007 MHz  
NUC2 1H  
CFDPRG2 waltz16  
PCPD2 70.00 usec  
PLM2 21.00000000 W  
PLM12 0.41714000 W  
PLM13 0.30239999 W

F2 - Processing parameters  
SI 16384  
SF 150.9126338 MHz  
WDW EM  
SSB 0  
LB 1.00 Hz  
GB 0  
PC 1.40

# HRMS spectra of **2u**

|                      |               |                    |    |                        |              |                               |                      |
|----------------------|---------------|--------------------|----|------------------------|--------------|-------------------------------|----------------------|
| <b>Sample Name</b>   | MB-BT-16-14   | <b>Position</b>    | -1 | <b>Instrument Name</b> | Instrument 1 | <b>User Name</b>              |                      |
| <b>Inj Vol</b>       | -10           | <b>InjPosition</b> |    | <b>SampleType</b>      | Sample       | <b>IRM Calibration Status</b> | Success              |
| <b>Data Filename</b> | MB-BT-16-14.d | <b>ACQ Method</b>  |    | <b>Comment</b>         |              | <b>Acquired Time</b>          | 5/13/2014 3:37:29 PM |

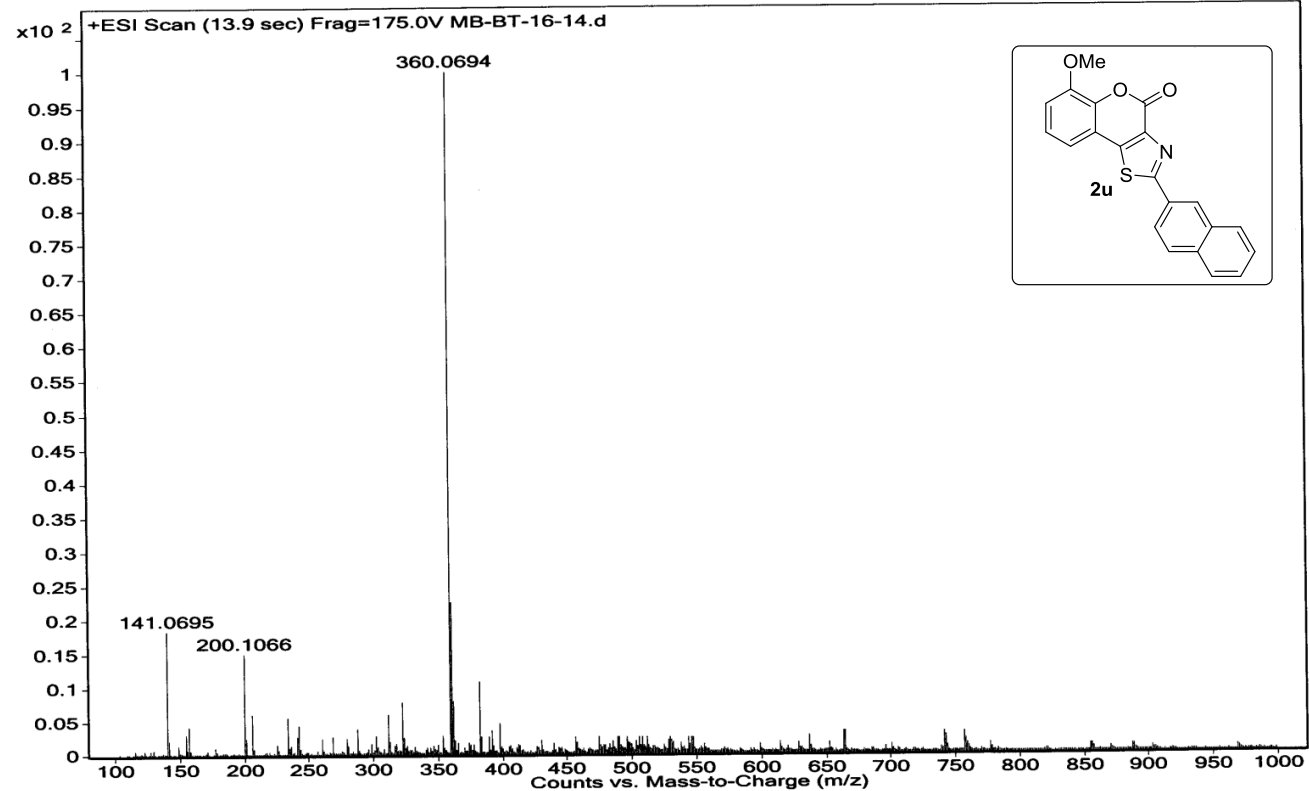

# <sup>1</sup>H NMR spectra of 2v

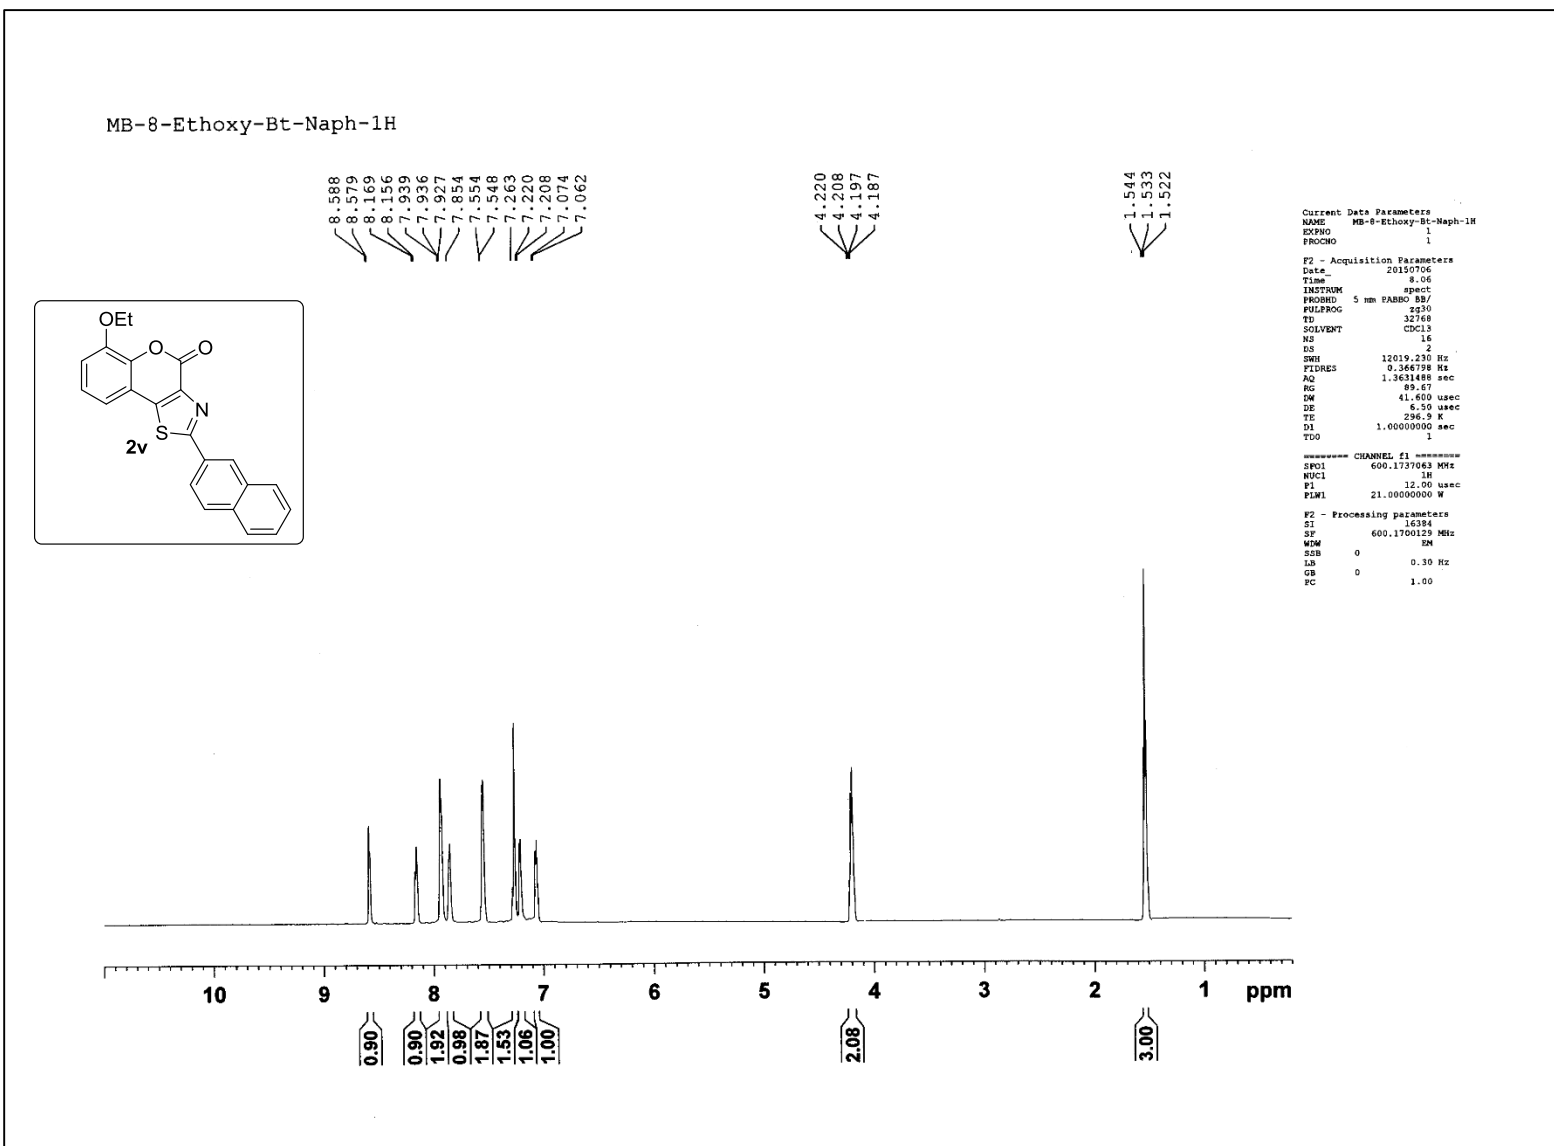



<sup>13</sup>C NMR spectra of **2v**

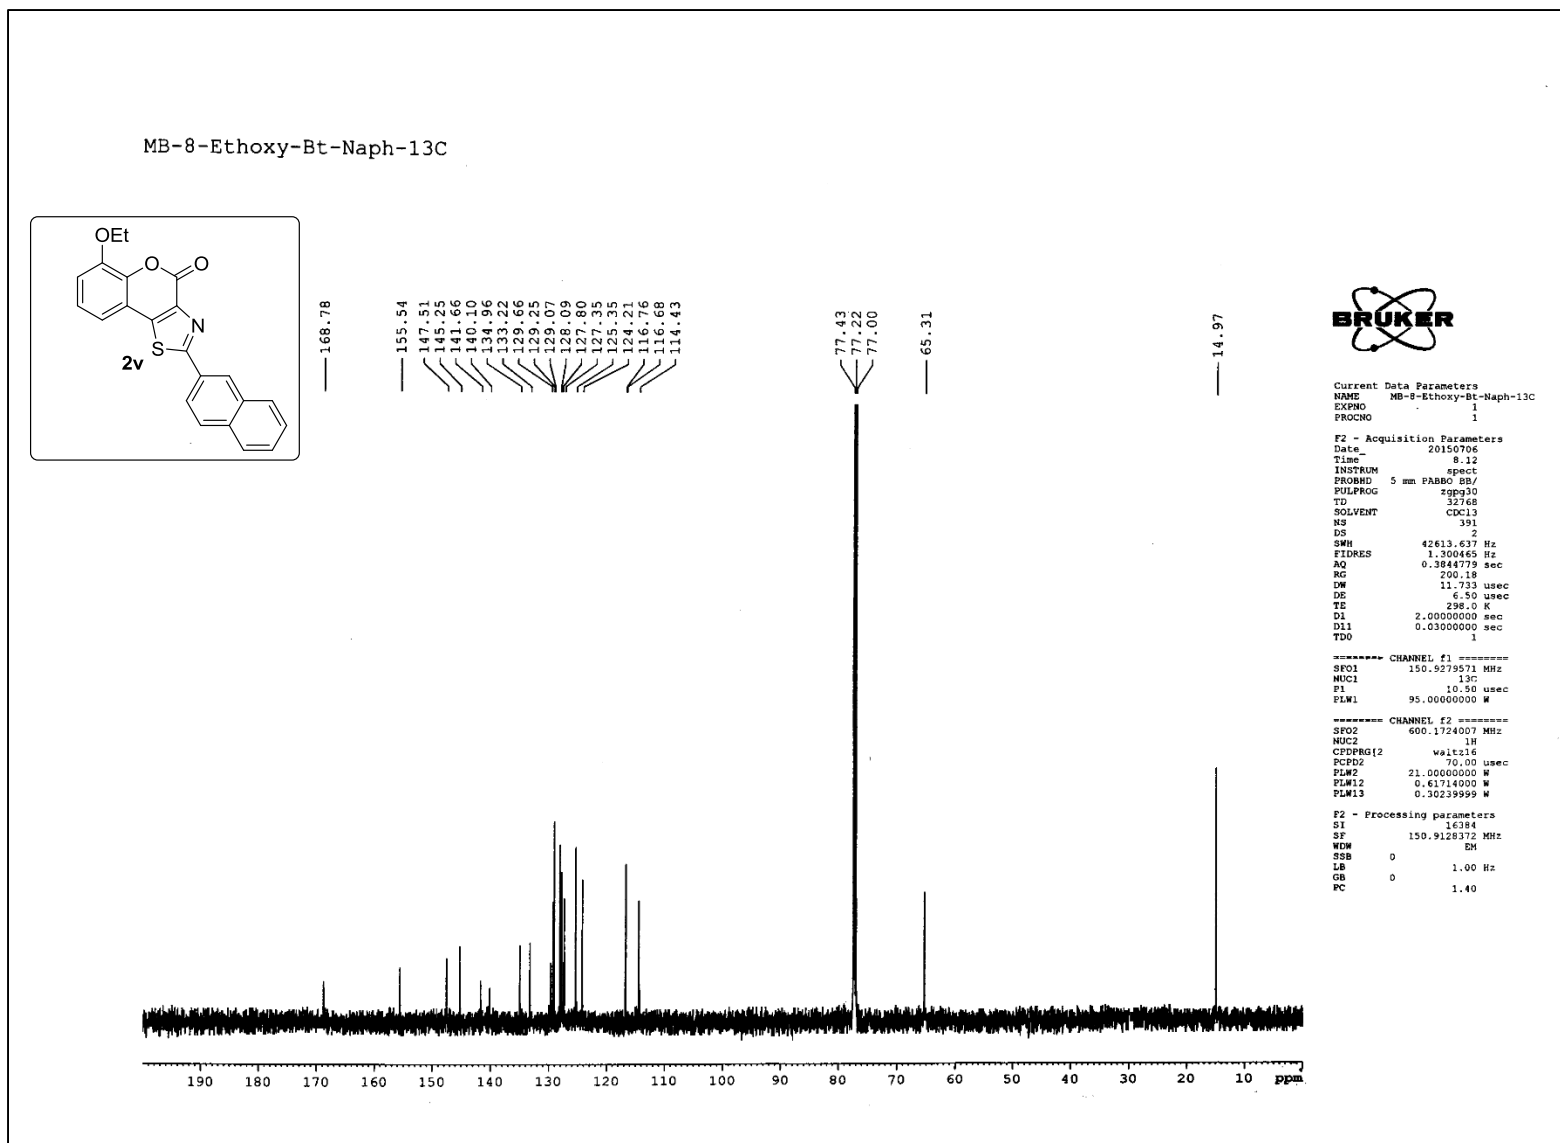

HRMS spectra of **2v**

|                      |               |                    |    |                        |              |                               |                      |
|----------------------|---------------|--------------------|----|------------------------|--------------|-------------------------------|----------------------|
| <b>Sample Name</b>   | MB-BT-15-14   | <b>Position</b>    | -1 | <b>Instrument Name</b> | Instrument 1 | <b>User Name</b>              |                      |
| <b>Inj Vol</b>       | -10           | <b>InjPosition</b> |    | <b>SampleType</b>      | Sample       | <b>IRM Calibration Status</b> | Success              |
| <b>Data Filename</b> | MB-BT-15-14.d | <b>ACQ Method</b>  |    | <b>Comment</b>         |              | <b>Acquired Time</b>          | 5/13/2014 2:40:28 PM |

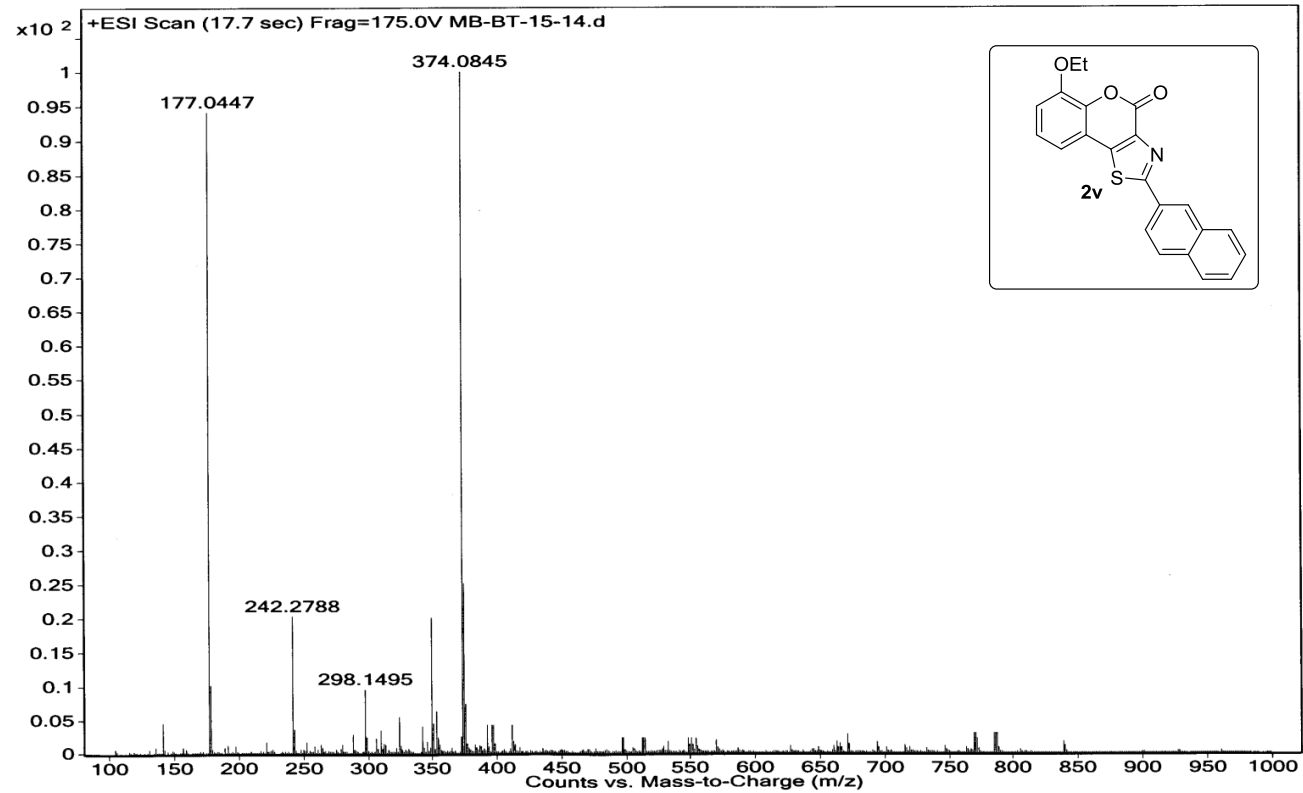

Supplement: c5ra20405d1.pdf [file c5ra20405d1.pdf]
